# Supplementary material for: A visual identification key utilizing both gestalt and analytic approaches to identification of Carices present in North America (Plantae, Cyperaceae)
Source: Biodivers Data J. 2013 Sep 16;(1):e984. doi: 10.3897/BDJ.1.e984 (PMC3964697; doi:10.3897/BDJ.1.e984)
Supplement: Supplementary file 2 — Authors: Jones, T. M. Data type: occurrences, morphological, images This file is an example of a build file for the creation of the CXML file. File: 957am fixed scirpoidea space issue.xlsx [file biodiversity_data_journal-1-e984-s002.xlsx]

## Sheet: Collection Items
Image Location	Image	LastFilename	LastFiletime	LastImage	Name	Href	Description	Genus	Item	Species	Country	Country2	Country3	U.S. State	U.S. State51	U.S. State2	U.S. State3	U.S. State4	U.S. State5	U.S. State6	U.S. State7	U.S. State8	U.S. State9	U.S. State10	U.S. State11	U.S. State12	U.S. State13	U.S. State14	U.S. State15	U.S. State16	U.S. State17	U.S. State18	U.S. State19	U.S. State20	U.S. State21	U.S. State22	U.S. State23	U.S. State24	U.S. State25	U.S. State26	U.S. State27	U.S. State28	U.S. State29	U.S. State30	U.S. State31	U.S. State32	U.S. State33	U.S. State34	U.S. State35
F:\SEPTEMBER 2010 PIVOT IMG CAREX KEY\aa ADDING 16-09-2010\carex-aboriginum-Anne-DeBolt.jpg	#0	F:\SEPTEMBER 2010 PIVOT IMG CAREX KEY\aa ADDING 16-09-2010\carex-aboriginum-Anne-DeBolt.jpg	2010-09-17 14:54:12	C:\January 2011 GLOSS PIVOT DEPLOY TESTS\JAN 04 2011\REAL A-10\A10_files\images\carex-aboriginum-Anne-DeBolt.xml	Carex aboriginum			Carex	taxon	Carex aboriginum		United States													Idaho
F:\AUGUST 2010 PIVOT IMAGES\MASTER LINES\carex-abrupta.jpg	#1	F:\AUGUST 2010 PIVOT IMAGES\MASTER LINES\carex-abrupta.jpg	2010-07-01 14:33:18	C:\January 2011 GLOSS PIVOT DEPLOY TESTS\JAN 04 2011\REAL A-10\A10_files\images\carex-abrupta.xml	Carex abrupta		Copyright New York Botanical Garden Press - used with permission	Carex	taxon	Carex abrupta		United States						California							Idaho																Nevada
F:\AUGUST 2010 PIVOT IMAGES\MASTER LINES\carex-abscondita.jpg	#2	F:\AUGUST 2010 PIVOT IMAGES\MASTER LINES\carex-abscondita.jpg	2010-07-01 14:37:33	C:\January 2011 GLOSS PIVOT DEPLOY TESTS\JAN 04 2011\REAL A-10\A10_files\images\carex-abscondita.xml	Carex abscondita		Copyright New York Botanical Garden Press - used with permission	Carex	taxon	Carex abscondita		United States		Alabama			Arkansas			Connecticut	Delaware	Florida	Georgia							Kentucky	Louisiana		Maryland	Massachusetts			Mississippi	Missouri					New Jersey		New York	North Carolina		Ohio	Oklahoma
F:\AUGUST 2010 PIVOT IMAGES\MASTER LINES\carex-adusta.jpg	#3	F:\AUGUST 2010 PIVOT IMAGES\MASTER LINES\carex-adusta.jpg	2010-07-01 14:34:57	C:\January 2011 GLOSS PIVOT DEPLOY TESTS\JAN 04 2011\REAL A-10\A10_files\images\carex-adusta.xml	Carex adusta		Copyright New York Botanical Garden Press - used with permission	Carex	taxon	Carex adusta	Canada	United States													Idaho							Maine			Michigan	Minnesota						New Hampshire	New Jersey		New York
F:\AUGUST 2010 PIVOT IMAGES\MASTER LINES\carex-aestivalis.jpg	#4	F:\AUGUST 2010 PIVOT IMAGES\MASTER LINES\carex-aestivalis.jpg	2010-07-01 14:38:47	C:\January 2011 GLOSS PIVOT DEPLOY TESTS\JAN 04 2011\REAL A-10\A10_files\images\carex-aestivalis.xml	Carex aestivalis		Copyright New York Botanical Garden Press - used with permission	Carex	taxon	Carex aestivalis		United States		Alabama									Georgia							Kentucky			Maryland												New York	North Carolina
F:\AUGUST 2010 PIVOT IMAGES\MASTER LINES\carex-aggregata (2).jpg	#5	F:\AUGUST 2010 PIVOT IMAGES\MASTER LINES\carex-aggregata (2).jpg	2010-07-01 14:31:14	C:\January 2011 GLOSS PIVOT DEPLOY TESTS\JAN 04 2011\REAL A-10\A10_files\images\carex-aggregata(2).xml	Carex aggregata		Copyright New York Botanical Garden Press - used with permission	Carex	taxon	Carex aggregata	Canada	United States		Alabama							Delaware					Illinois	Indiana	Iowa		Kentucky			Maryland			Minnesota		Missouri					New Jersey		New York	North Carolina		Ohio	Oklahoma
F:\AUGUST 2010 PIVOT IMAGES\MASTER LINES\carex-alata.jpg	#6	F:\AUGUST 2010 PIVOT IMAGES\MASTER LINES\carex-alata.jpg	2010-07-01 14:45:20	C:\January 2011 GLOSS PIVOT DEPLOY TESTS\JAN 04 2011\REAL A-10\A10_files\images\carex-alata.xml	Carex alata		Copyright New York Botanical Garden Press - used with permission	Carex	taxon	Carex alata	Canada	United States		Alabama			Arkansas			Connecticut	Delaware	Florida	Georgia			Illinois	Indiana			Kentucky	Louisiana		Maryland	Massachusetts	Michigan			Missouri				New Hampshire	New Jersey		New York	North Carolina		Ohio	Oklahoma
F:\AUGUST 2010 PIVOT IMAGES\MASTER LINES\carex-albicans.jpg	#7	F:\AUGUST 2010 PIVOT IMAGES\MASTER LINES\carex-albicans.jpg	2010-07-01 14:35:29	C:\January 2011 GLOSS PIVOT DEPLOY TESTS\JAN 04 2011\REAL A-10\A10_files\images\carex-albicans.xml	Carex albicans		Copyright New York Botanical Garden Press - used with permission	Carex	taxon	Carex albicans	Canada	United States	Mexico	Alabama			Arkansas			Connecticut	Delaware		Georgia			Illinois	Indiana	Iowa	Kansas	Kentucky	Louisiana	Maine	Maryland	Massachusetts	Michigan		Mississippi	Missouri		Nebraska		New Hampshire	New Jersey		New York	North Carolina		Ohio	Oklahoma
F:\AUGUST 2010 PIVOT IMAGES\MASTER LINES\carex-albo-nigra.jpg	#8	F:\AUGUST 2010 PIVOT IMAGES\MASTER LINES\carex-albo-nigra.jpg	2010-07-01 14:41:34	C:\January 2011 GLOSS PIVOT DEPLOY TESTS\JAN 04 2011\REAL A-10\A10_files\images\carex-albo-nigra.xml	Carex albonigra		Copyright New York Botanical Garden Press - used with permission	Carex	taxon	Carex albonigra	Canada	United States			Alaska	Arizona		California	Colorado						Idaho														Montana		Nevada
F:\AUGUST 2010 PIVOT IMAGES\MASTER LINES\carex-albursina.jpg	#9	F:\AUGUST 2010 PIVOT IMAGES\MASTER LINES\carex-albursina.jpg	2010-07-01 14:37:53	C:\January 2011 GLOSS PIVOT DEPLOY TESTS\JAN 04 2011\REAL A-10\A10_files\images\carex-albursina.xml	Carex albursina		Copyright New York Botanical Garden Press - used with permission	Carex	taxon	Carex albursina	Canada	United States		Alabama			Arkansas			Connecticut			Georgia			Illinois	Indiana	Iowa		Kentucky			Maryland	Massachusetts	Michigan	Minnesota		Missouri				New Hampshire	New Jersey		New York	North Carolina		Ohio	Oklahoma
F:\AUGUST 2010 PIVOT IMAGES\MASTER LINES\carex-alma.jpg	#10	F:\AUGUST 2010 PIVOT IMAGES\MASTER LINES\carex-alma.jpg	2010-07-01 14:31:18	C:\January 2011 GLOSS PIVOT DEPLOY TESTS\JAN 04 2011\REAL A-10\A10_files\images\carex-alma.xml	Carex alma		Copyright New York Botanical Garden Press - used with permission	Carex	taxon	Carex alma		United States	Mexico			Arizona		California																							Nevada			New Mexico
F:\AUGUST 2010 PIVOT IMAGES\MASTER LINES\carex-alopecoidea.jpg	#11	F:\AUGUST 2010 PIVOT IMAGES\MASTER LINES\carex-alopecoidea.jpg	2010-07-01 14:45:05	C:\January 2011 GLOSS PIVOT DEPLOY TESTS\JAN 04 2011\REAL A-10\A10_files\images\carex-alopecoidea.xml	Carex alopecoidea		Copyright New York Botanical Garden Press - used with permission	Carex	taxon	Carex alopecoidea	Canada	United States								Connecticut	Delaware					Illinois	Indiana	Iowa		Kentucky		Maine	Maryland	Massachusetts	Michigan	Minnesota		Missouri				New Hampshire	New Jersey		New York		North Dakota	Ohio
F:\AUGUST 2010 PIVOT IMAGES\MASTER LINES\carex-amphibola.jpg	#12	F:\AUGUST 2010 PIVOT IMAGES\MASTER LINES\carex-amphibola.jpg	2010-07-01 14:38:14	C:\January 2011 GLOSS PIVOT DEPLOY TESTS\JAN 04 2011\REAL A-10\A10_files\images\carex-amphibola.xml	Carex amphibola		Copyright New York Botanical Garden Press - used with permission	Carex	taxon	Carex amphibola	Canada	United States		Alabama			Arkansas			Connecticut	Delaware	Florida	Georgia			Illinois	Indiana	Iowa	Kansas	Kentucky	Louisiana	Maine	Maryland	Massachusetts	Michigan	Minnesota	Mississippi	Missouri		Nebraska		New Hampshire	New Jersey		New York	North Carolina		Ohio	Oklahoma
F:\AUGUST 2010 PIVOT IMAGES\MASTER LINES\carex-amplectens.jpg	#13	F:\AUGUST 2010 PIVOT IMAGES\MASTER LINES\carex-amplectens.jpg	2010-07-01 14:33:43	C:\January 2011 GLOSS PIVOT DEPLOY TESTS\JAN 04 2011\REAL A-10\A10_files\images\carex-amplectens.xml	Carex amplectens		Copyright New York Botanical Garden Press - used with permission	Carex	taxon	Carex amplectens		United States						California
F:\AUGUST 2010 PIVOT IMAGES\MASTER LINES\carex-amplifolia.jpg	#14	F:\AUGUST 2010 PIVOT IMAGES\MASTER LINES\carex-amplifolia.jpg	2010-07-01 14:40:41	C:\January 2011 GLOSS PIVOT DEPLOY TESTS\JAN 04 2011\REAL A-10\A10_files\images\carex-amplifolia.xml	Carex amplifolia		Copyright New York Botanical Garden Press - used with permission	Carex	taxon	Carex amplifolia	Canada	United States						California							Idaho														Montana					New Mexico
F:\AUGUST 2010 PIVOT IMAGES\MASTER LINES\carex-annectens.jpg	#15	F:\AUGUST 2010 PIVOT IMAGES\MASTER LINES\carex-annectens.jpg	2010-07-01 14:31:31	C:\January 2011 GLOSS PIVOT DEPLOY TESTS\JAN 04 2011\REAL A-10\A10_files\images\carex-annectens.xml	Carex annectens		Copyright New York Botanical Garden Press - used with permission	Carex	taxon	Carex annectens	Canada	United States					Arkansas			Connecticut	Delaware					Illinois	Indiana	Iowa	Kansas	Kentucky	Louisiana	Maine	Maryland	Massachusetts	Michigan	Minnesota	Mississippi	Missouri		Nebraska		New Hampshire	New Jersey		New York	North Carolina		Ohio	Oklahoma
F:\AUGUST 2010 PIVOT IMAGES\MASTER LINES\carex-anthoxanthea.jpg	#16	F:\AUGUST 2010 PIVOT IMAGES\MASTER LINES\carex-anthoxanthea.jpg	2010-07-01 14:29:57	C:\January 2011 GLOSS PIVOT DEPLOY TESTS\JAN 04 2011\REAL A-10\A10_files\images\carex-anthoxanthea.xml	Carex anthoxanthea		Copyright New York Botanical Garden Press - used with permission	Carex	taxon	Carex anthoxanthea	Canada	United States			Alaska
F:\AUGUST 2010 PIVOT IMAGES\MASTER LINES\carex-aperta.jpg	#17	F:\AUGUST 2010 PIVOT IMAGES\MASTER LINES\carex-aperta.jpg	2010-07-01 14:42:14	C:\January 2011 GLOSS PIVOT DEPLOY TESTS\JAN 04 2011\REAL A-10\A10_files\images\carex-aperta.xml	Carex aperta		Copyright New York Botanical Garden Press - used with permission	Carex	taxon	Carex aperta	Canada	United States													Idaho														Montana
F:\AUGUST 2010 PIVOT IMAGES\MASTER LINES\carex-aquatilis.jpg	#18	F:\AUGUST 2010 PIVOT IMAGES\MASTER LINES\carex-aquatilis.jpg	2010-07-01 14:42:21	C:\January 2011 GLOSS PIVOT DEPLOY TESTS\JAN 04 2011\REAL A-10\A10_files\images\carex-aquatilis.xml	Carex aquatilis		Copyright New York Botanical Garden Press - used with permission	Carex	taxon	Carex aquatilis	Canada	United States			Alaska	Arizona		California	Colorado	Connecticut					Idaho	Illinois	Indiana	Iowa	Kansas			Maine	Maryland	Massachusetts	Michigan	Minnesota		Missouri	Montana	Nebraska	Nevada	New Hampshire	New Jersey	New Mexico	New York		North Dakota	Ohio
F:\AUGUST 2010 PIVOT IMAGES\MASTER LINES\carex-arapahoensis.jpg	#19	F:\AUGUST 2010 PIVOT IMAGES\MASTER LINES\carex-arapahoensis.jpg	2010-07-01 14:34:54	C:\January 2011 GLOSS PIVOT DEPLOY TESTS\JAN 04 2011\REAL A-10\A10_files\images\carex-arapahoensis.xml	Carex arapahoensis		Copyright New York Botanical Garden Press - used with permission	Carex	taxon	Carex arapahoensis		United States							Colorado
F:\AUGUST 2010 PIVOT IMAGES\MASTER LINES\carex-arcta.jpg	#20	F:\AUGUST 2010 PIVOT IMAGES\MASTER LINES\carex-arcta.jpg	2010-07-01 14:45:10	C:\January 2011 GLOSS PIVOT DEPLOY TESTS\JAN 04 2011\REAL A-10\A10_files\images\carex-arcta.xml	Carex arcta		Copyright New York Botanical Garden Press - used with permission	Carex	taxon	Carex arcta	Canada	United States			Alaska			California							Idaho							Maine		Massachusetts	Michigan	Minnesota			Montana			New Hampshire			New York
F:\AUGUST 2010 PIVOT IMAGES\MASTER LINES\carex-arctata.jpg	#21	F:\AUGUST 2010 PIVOT IMAGES\MASTER LINES\carex-arctata.jpg	2010-07-01 14:39:08	C:\January 2011 GLOSS PIVOT DEPLOY TESTS\JAN 04 2011\REAL A-10\A10_files\images\carex-arctata.xml	Carex arctata		Copyright New York Botanical Garden Press - used with permission	Carex	taxon	Carex arctata	Canada	United States								Connecticut							Indiana					Maine		Massachusetts	Michigan	Minnesota						New Hampshire			New York			Ohio
F:\AUGUST 2010 PIVOT IMAGES\MASTER LINES\carex-arenaria.jpg	#22	F:\AUGUST 2010 PIVOT IMAGES\MASTER LINES\carex-arenaria.jpg	2010-07-01 14:30:24	C:\January 2011 GLOSS PIVOT DEPLOY TESTS\JAN 04 2011\REAL A-10\A10_files\images\carex-arenaria.xml	Carex arenaria		Copyright New York Botanical Garden Press - used with permission	Carex	taxon	Carex arenaria		United States									Delaware												Maryland
F:\AUGUST 2010 PIVOT IMAGES\MASTER LINES\carex-arkansana.jpg	#23	F:\AUGUST 2010 PIVOT IMAGES\MASTER LINES\carex-arkansana.jpg	2010-07-01 14:31:00	C:\January 2011 GLOSS PIVOT DEPLOY TESTS\JAN 04 2011\REAL A-10\A10_files\images\carex-arkansana.xml	Carex arkansana		Copyright New York Botanical Garden Press - used with permission	Carex	taxon	Carex arkansana		United States					Arkansas									Illinois			Kansas		Louisiana							Missouri											Oklahoma
F:\AUGUST 2010 PIVOT IMAGES\MASTER LINES\carex-arsenii.jpg	#24	F:\AUGUST 2010 PIVOT IMAGES\MASTER LINES\carex-arsenii.jpg	2010-07-01 14:35:11	C:\January 2011 GLOSS PIVOT DEPLOY TESTS\JAN 04 2011\REAL A-10\A10_files\images\carex-arsenii.xml	Carex arsenii		Copyright New York Botanical Garden Press - used with permission	Carex	taxon	Carex arsenii			Mexico
F:\AUGUST 2010 PIVOT IMAGES\MASTER LINES\carex-assiniboinensis.jpg	#25	F:\AUGUST 2010 PIVOT IMAGES\MASTER LINES\carex-assiniboinensis.jpg	2010-07-01 14:45:35	C:\January 2011 GLOSS PIVOT DEPLOY TESTS\JAN 04 2011\REAL A-10\A10_files\images\carex-assiniboinensis.xml	Carex assiniboinensis		Copyright New York Botanical Garden Press - used with permission	Carex	taxon	Carex assiniboinensis	Canada	United States																Iowa							Michigan	Minnesota	Mississippi										North Dakota
F:\AUGUST 2010 PIVOT IMAGES\MASTER LINES\carex-atherodes.jpg	#26	F:\AUGUST 2010 PIVOT IMAGES\MASTER LINES\carex-atherodes.jpg	2010-07-01 14:43:38	C:\January 2011 GLOSS PIVOT DEPLOY TESTS\JAN 04 2011\REAL A-10\A10_files\images\carex-atherodes.xml	Carex atherodes		Copyright New York Botanical Garden Press - used with permission	Carex	taxon	Carex atherodes	Canada	United States			Alaska	Arizona		California	Colorado						Idaho	Illinois	Indiana	Iowa	Kansas	Kentucky		Maine			Michigan	Minnesota		Missouri	Montana	Nebraska	Nevada			New Mexico	New York		North Dakota	Ohio
F:\AUGUST 2010 PIVOT IMAGES\MASTER LINES\carex-athrostachya.jpg	#27	F:\AUGUST 2010 PIVOT IMAGES\MASTER LINES\carex-athrostachya.jpg	2010-07-01 14:35:02	C:\January 2011 GLOSS PIVOT DEPLOY TESTS\JAN 04 2011\REAL A-10\A10_files\images\carex-athrostachya.xml	Carex athrostachya		Copyright New York Botanical Garden Press - used with permission	Carex	taxon	Carex athrostachya	Canada	United States	Mexico		Alaska	Arizona		California	Colorado						Idaho														Montana		Nevada						North Dakota
F:\AUGUST 2010 PIVOT IMAGES\MASTER LINES\carex-atlantica.jpg	#28	F:\AUGUST 2010 PIVOT IMAGES\MASTER LINES\carex-atlantica.jpg	2010-07-01 14:32:44	C:\January 2011 GLOSS PIVOT DEPLOY TESTS\JAN 04 2011\REAL A-10\A10_files\images\carex-atlantica.xml	Carex atlantica		Copyright New York Botanical Garden Press - used with permission	Carex	taxon	Carex atlantica	Canada	United States		Alabama			Arkansas			Connecticut	Delaware	Florida	Georgia			Illinois	Indiana			Kentucky	Louisiana	Maine	Maryland	Massachusetts	Michigan		Mississippi		Montana			New Hampshire	New Jersey		New York	North Carolina		Ohio
F:\AUGUST 2010 PIVOT IMAGES\MASTER LINES\carex-atratiformis.jpg	#29	F:\AUGUST 2010 PIVOT IMAGES\MASTER LINES\carex-atratiformis.jpg	2010-07-01 14:41:41	C:\January 2011 GLOSS PIVOT DEPLOY TESTS\JAN 04 2011\REAL A-10\A10_files\images\carex-atratiformis.xml	Carex atratiformis		Copyright New York Botanical Garden Press - used with permission	Carex	taxon	Carex atratiformis	Canada	United States			Alaska																	Maine			Michigan							New Hampshire			New York
F:\AUGUST 2010 PIVOT IMAGES\MASTER LINES\carex-atrofusca.jpg	#30	F:\AUGUST 2010 PIVOT IMAGES\MASTER LINES\carex-atrofusca.jpg	2010-07-01 14:39:43	C:\January 2011 GLOSS PIVOT DEPLOY TESTS\JAN 04 2011\REAL A-10\A10_files\images\carex-atrofusca.xml	Carex atrofusca		Copyright New York Botanical Garden Press - used with permission	Carex	taxon	Carex atrofusca	Canada	United States			Alaska
F:\AUGUST 2010 PIVOT IMAGES\MASTER LINES\carex-atrosquama.jpg	#31	F:\AUGUST 2010 PIVOT IMAGES\MASTER LINES\carex-atrosquama.jpg	2010-07-01 14:41:26	C:\January 2011 GLOSS PIVOT DEPLOY TESTS\JAN 04 2011\REAL A-10\A10_files\images\carex-atrosquama.xml	Carex atrosquama		Copyright New York Botanical Garden Press - used with permission	Carex	taxon	Carex atrosquama	Canada	United States			Alaska				Colorado						Idaho														Montana
F:\AUGUST 2010 PIVOT IMAGES\MASTER LINES\carex-aurea.jpg	#32	F:\AUGUST 2010 PIVOT IMAGES\MASTER LINES\carex-aurea.jpg	2010-07-01 14:37:06	C:\January 2011 GLOSS PIVOT DEPLOY TESTS\JAN 04 2011\REAL A-10\A10_files\images\carex-aurea.xml	Carex aurea		Copyright New York Botanical Garden Press - used with permission	Carex	taxon	Carex aurea	Canada	United States			Alaska	Arizona		California	Colorado	Connecticut					Idaho	Illinois	Indiana		Kansas			Maine		Massachusetts	Michigan	Minnesota			Montana	Nebraska		New Hampshire		New Mexico	New York		North Dakota	Ohio
F:\AUGUST 2010 PIVOT IMAGES\MASTER LINES\carex-austrina.jpg	#33	F:\AUGUST 2010 PIVOT IMAGES\MASTER LINES\carex-austrina.jpg	2010-07-01 14:31:09	C:\January 2011 GLOSS PIVOT DEPLOY TESTS\JAN 04 2011\REAL A-10\A10_files\images\carex-austrina.xml	Carex austrina		Copyright New York Botanical Garden Press - used with permission	Carex	taxon	Carex austrina		United States		Alabama			Arkansas					Florida				Illinois	Indiana	Iowa	Kansas		Louisiana						Mississippi	Missouri								North Carolina			Oklahoma
F:\AUGUST 2010 PIVOT IMAGES\MASTER LINES\carex-austro-caroliniana.jpg	#34	F:\AUGUST 2010 PIVOT IMAGES\MASTER LINES\carex-austro-caroliniana.jpg	2010-07-01 14:37:25	C:\January 2011 GLOSS PIVOT DEPLOY TESTS\JAN 04 2011\REAL A-10\A10_files\images\carex-austro-caroliniana.xml	Carex austrocaroliniana		Copyright New York Botanical Garden Press - used with permission	Carex	taxon	Carex austrocaroliniana		United States		Alabama									Georgia							Kentucky																North Carolina
F:\AUGUST 2010 PIVOT IMAGES\MASTER LINES\carex-aztecica.jpg	#35	F:\AUGUST 2010 PIVOT IMAGES\MASTER LINES\carex-aztecica.jpg	2010-07-01 14:36:56	C:\January 2011 GLOSS PIVOT DEPLOY TESTS\JAN 04 2011\REAL A-10\A10_files\images\carex-aztecica.xml	Carex aztecica		Copyright New York Botanical Garden Press - used with permission	Carex	taxon	Carex aztecica			Mexico
F:\AUGUST 2010 PIVOT IMAGES\MASTER LINES\carex-backii.jpg	#36	F:\AUGUST 2010 PIVOT IMAGES\MASTER LINES\carex-backii.jpg	2010-07-01 14:45:25	C:\January 2011 GLOSS PIVOT DEPLOY TESTS\JAN 04 2011\REAL A-10\A10_files\images\carex-backii.xml	Carex backii		Copyright New York Botanical Garden Press - used with permission	Carex	taxon	Carex backii	Canada	United States							Colorado									Iowa				Maine			Michigan	Minnesota			Montana			New Hampshire	New Jersey		New York		North Dakota
F:\AUGUST 2010 PIVOT IMAGES\MASTER LINES\carex-baileyi.jpg	#37	F:\AUGUST 2010 PIVOT IMAGES\MASTER LINES\carex-baileyi.jpg	2010-07-01 14:44:20	C:\January 2011 GLOSS PIVOT DEPLOY TESTS\JAN 04 2011\REAL A-10\A10_files\images\carex-baileyi.xml	Carex baileyi		Copyright New York Botanical Garden Press - used with permission	Carex	taxon	Carex baileyi	Canada	United States					Arkansas			Connecticut					Idaho	Illinois				Kentucky		Maine	Maryland	Massachusetts								New Hampshire			New York	North Carolina
F:\AUGUST 2010 PIVOT IMAGES\MASTER LINES\carex-baltzellii.jpg	#38	F:\AUGUST 2010 PIVOT IMAGES\MASTER LINES\carex-baltzellii.jpg	2010-07-01 14:36:26	C:\January 2011 GLOSS PIVOT DEPLOY TESTS\JAN 04 2011\REAL A-10\A10_files\images\carex-baltzellii.xml	Carex baltzellii		Copyright New York Botanical Garden Press - used with permission	Carex	taxon	Carex baltzellii		United States		Alabama								Florida	Georgia														Mississippi
F:\AUGUST 2010 PIVOT IMAGES\MASTER LINES\carex-barattii.jpg	#39	F:\AUGUST 2010 PIVOT IMAGES\MASTER LINES\carex-barattii.jpg	2010-07-01 14:40:54	C:\January 2011 GLOSS PIVOT DEPLOY TESTS\JAN 04 2011\REAL A-10\A10_files\images\carex-barattii.xml	Carex barrattii		Copyright New York Botanical Garden Press - used with permission	Carex	taxon	Carex barrattii		United States		Alabama						Connecticut	Delaware												Maryland										New Jersey		New York	North Carolina
F:\AUGUST 2010 PIVOT IMAGES\MASTER LINES\carex-barbarae.jpg	#40	F:\AUGUST 2010 PIVOT IMAGES\MASTER LINES\carex-barbarae.jpg	2010-07-01 14:42:24	C:\January 2011 GLOSS PIVOT DEPLOY TESTS\JAN 04 2011\REAL A-10\A10_files\images\carex-barbarae.xml	Carex barbarae		Copyright New York Botanical Garden Press - used with permission	Carex	taxon	Carex barbarae		United States						California
F:\AUGUST 2010 PIVOT IMAGES\MASTER LINES\carex-bebbii.jpg	#41	F:\AUGUST 2010 PIVOT IMAGES\MASTER LINES\carex-bebbii.jpg	2010-07-01 14:34:09	C:\January 2011 GLOSS PIVOT DEPLOY TESTS\JAN 04 2011\REAL A-10\A10_files\images\carex-bebbii.xml	Carex bebbii		Copyright New York Botanical Garden Press - used with permission	Carex	taxon	Carex bebbii	Canada	United States			Alaska				Colorado	Connecticut					Idaho	Illinois	Indiana	Iowa				Maine		Massachusetts	Michigan	Minnesota			Montana	Nebraska	Nevada	New Hampshire	New Jersey		New York		North Dakota	Ohio
F:\AUGUST 2010 PIVOT IMAGES\MASTER LINES\carex-becknellii.jpg	#42	F:\AUGUST 2010 PIVOT IMAGES\MASTER LINES\carex-becknellii.jpg	2010-07-01 14:34:31	C:\January 2011 GLOSS PIVOT DEPLOY TESTS\JAN 04 2011\REAL A-10\A10_files\images\carex-becknellii.xml	Carex bicknellii		Copyright New York Botanical Garden Press - used with permission	Carex	taxon	Carex bicknellii	Canada	United States					Arkansas			Connecticut						Illinois	Indiana	Iowa	Kansas					Massachusetts	Michigan	Minnesota	Mississippi	Missouri		Nebraska		New Hampshire	New Jersey		New York			Ohio	Oklahoma
F:\AUGUST 2010 PIVOT IMAGES\MASTER LINES\carex-bella (2).jpg	#43	F:\AUGUST 2010 PIVOT IMAGES\MASTER LINES\carex-bella (2).jpg	2010-07-01 14:41:33	C:\January 2011 GLOSS PIVOT DEPLOY TESTS\JAN 04 2011\REAL A-10\A10_files\images\carex-bella(2).xml	Carex bella		Copyright New York Botanical Garden Press - used with permission	Carex	taxon	Carex bella		United States	Mexico			Arizona			Colorado																						Nevada			New Mexico
F:\AUGUST 2010 PIVOT IMAGES\MASTER LINES\carex-bicolor.jpg	#44	F:\AUGUST 2010 PIVOT IMAGES\MASTER LINES\carex-bicolor.jpg	2010-07-01 14:37:01	C:\January 2011 GLOSS PIVOT DEPLOY TESTS\JAN 04 2011\REAL A-10\A10_files\images\carex-bicolor.xml	Carex bicolor		Copyright New York Botanical Garden Press - used with permission	Carex	taxon	Carex bicolor	Canada	United States			Alaska
F:\AUGUST 2010 PIVOT IMAGES\MASTER LINES\carex-biltmoreana.jpg	#45	F:\AUGUST 2010 PIVOT IMAGES\MASTER LINES\carex-biltmoreana.jpg	2010-07-01 14:37:16	C:\January 2011 GLOSS PIVOT DEPLOY TESTS\JAN 04 2011\REAL A-10\A10_files\images\carex-biltmoreana.xml	Carex biltmoreana		Copyright New York Botanical Garden Press - used with permission	Carex	taxon	Carex biltmoreana		United States											Georgia																							North Carolina
F:\AUGUST 2010 PIVOT IMAGES\MASTER LINES\carex-blanda.jpg	#46	F:\AUGUST 2010 PIVOT IMAGES\MASTER LINES\carex-blanda.jpg	2010-07-01 14:37:55	C:\January 2011 GLOSS PIVOT DEPLOY TESTS\JAN 04 2011\REAL A-10\A10_files\images\carex-blanda.xml	Carex blanda		Copyright New York Botanical Garden Press - used with permission	Carex	taxon	Carex blanda	Canada	United States		Alabama			Arkansas		Colorado	Connecticut	Delaware	Florida	Georgia			Illinois	Indiana	Iowa	Kansas	Kentucky	Louisiana	Maine	Maryland	Massachusetts	Michigan	Minnesota	Mississippi	Missouri		Nebraska		New Hampshire	New Jersey	New Mexico	New York	North Carolina	North Dakota	Ohio	Oklahoma
F:\AUGUST 2010 PIVOT IMAGES\MASTER LINES\carex-bolanderi.jpg	#47	F:\AUGUST 2010 PIVOT IMAGES\MASTER LINES\carex-bolanderi.jpg	2010-07-01 14:33:06	C:\January 2011 GLOSS PIVOT DEPLOY TESTS\JAN 04 2011\REAL A-10\A10_files\images\carex-bolanderi.xml	Carex bolanderi		Copyright New York Botanical Garden Press - used with permission	Carex	taxon	Carex bolanderi	Canada	United States	Mexico			Arizona		California							Idaho														Montana		Nevada			New Mexico
F:\AUGUST 2010 PIVOT IMAGES\MASTER LINES\carex-boliviensis.jpg	#48	F:\AUGUST 2010 PIVOT IMAGES\MASTER LINES\carex-boliviensis.jpg	2010-07-01 14:45:56	C:\January 2011 GLOSS PIVOT DEPLOY TESTS\JAN 04 2011\REAL A-10\A10_files\images\carex-boliviensis.xml	Carex boliviensis		Copyright New York Botanical Garden Press - used with permission	Carex	taxon	Carex boliviensis			Mexico
F:\AUGUST 2010 PIVOT IMAGES\MASTER LINES\carex-bonanzensis.jpg	#49	F:\AUGUST 2010 PIVOT IMAGES\MASTER LINES\carex-bonanzensis.jpg	2010-07-01 14:32:21	C:\January 2011 GLOSS PIVOT DEPLOY TESTS\JAN 04 2011\REAL A-10\A10_files\images\carex-bonanzensis.xml	Carex bonanzensis		Copyright New York Botanical Garden Press - used with permission	Carex	taxon	Carex bonanzensis	Canada	United States			Alaska
F:\AUGUST 2010 PIVOT IMAGES\MASTER LINES\carex-brainerdii.jpg	#50	F:\AUGUST 2010 PIVOT IMAGES\MASTER LINES\carex-brainerdii.jpg	2010-07-01 14:35:49	C:\January 2011 GLOSS PIVOT DEPLOY TESTS\JAN 04 2011\REAL A-10\A10_files\images\carex-brainerdii.xml	Carex brainerdii		Copyright New York Botanical Garden Press - used with permission	Carex	taxon	Carex brainerdii		United States						California
F:\AUGUST 2010 PIVOT IMAGES\MASTER LINES\carex-brevicaulis.jpg	#51	F:\AUGUST 2010 PIVOT IMAGES\MASTER LINES\carex-brevicaulis.jpg	2010-07-01 14:35:59	C:\January 2011 GLOSS PIVOT DEPLOY TESTS\JAN 04 2011\REAL A-10\A10_files\images\carex-brevicaulis.xml	Carex brevicaulis		Copyright New York Botanical Garden Press - used with permission	Carex	taxon	Carex brevicaulis	Canada	United States						California
F:\AUGUST 2010 PIVOT IMAGES\MASTER LINES\carex-brevior.jpg	#52	F:\AUGUST 2010 PIVOT IMAGES\MASTER LINES\carex-brevior.jpg	2010-07-01 14:34:20	C:\January 2011 GLOSS PIVOT DEPLOY TESTS\JAN 04 2011\REAL A-10\A10_files\images\carex-brevior.xml	Carex brevior		Copyright New York Botanical Garden Press - used with permission	Carex	taxon	Carex brevior	Canada	United States	Mexico			Arizona	Arkansas		Colorado	Connecticut	Delaware				Idaho	Illinois	Indiana	Iowa	Kansas	Kentucky		Maine	Maryland	Massachusetts	Michigan	Minnesota	Mississippi	Missouri	Montana	Nebraska		New Hampshire	New Jersey	New Mexico	New York		North Dakota	Ohio	Oklahoma
F:\AUGUST 2010 PIVOT IMAGES\MASTER LINES\carex-breweri.jpg	#53	F:\AUGUST 2010 PIVOT IMAGES\MASTER LINES\carex-breweri.jpg	2010-07-01 14:29:55	C:\January 2011 GLOSS PIVOT DEPLOY TESTS\JAN 04 2011\REAL A-10\A10_files\images\carex-breweri.xml	Carex breweri		Copyright New York Botanical Garden Press - used with permission	Carex	taxon	Carex breweri	Canada	United States						California																							Nevada
F:\AUGUST 2010 PIVOT IMAGES\MASTER LINES\carex-bromoides.jpg	#54	F:\AUGUST 2010 PIVOT IMAGES\MASTER LINES\carex-bromoides.jpg	2010-07-01 14:33:01	C:\January 2011 GLOSS PIVOT DEPLOY TESTS\JAN 04 2011\REAL A-10\A10_files\images\carex-bromoides.xml	Carex bromoides		Copyright New York Botanical Garden Press - used with permission	Carex	taxon	Carex bromoides	Canada	United States	Mexico	Alabama			Arkansas			Connecticut	Delaware	Florida	Georgia			Illinois	Indiana			Kentucky	Louisiana	Maine	Maryland	Massachusetts	Michigan	Minnesota	Mississippi	Missouri				New Hampshire	New Jersey		New York	North Carolina		Ohio
F:\AUGUST 2010 PIVOT IMAGES\MASTER LINES\carex-brunnescens.jpg	#55	F:\AUGUST 2010 PIVOT IMAGES\MASTER LINES\carex-brunnescens.jpg	2010-07-01 14:32:19	C:\January 2011 GLOSS PIVOT DEPLOY TESTS\JAN 04 2011\REAL A-10\A10_files\images\carex-brunnescens.xml	Carex brunnescens		Copyright New York Botanical Garden Press - used with permission	Carex	taxon	Carex brunnescens	Canada	United States			Alaska				Colorado	Connecticut			Georgia		Idaho	Illinois	Indiana					Maine	Maryland	Massachusetts	Michigan	Minnesota			Montana			New Hampshire	New Jersey		New York	North Carolina	North Dakota	Ohio	Oklahoma
F:\AUGUST 2010 PIVOT IMAGES\MASTER LINES\carex-bullata.jpg	#56	F:\AUGUST 2010 PIVOT IMAGES\MASTER LINES\carex-bullata.jpg	2010-07-01 14:44:10	C:\January 2011 GLOSS PIVOT DEPLOY TESTS\JAN 04 2011\REAL A-10\A10_files\images\carex-bullata.xml	Carex bullata		Copyright New York Botanical Garden Press - used with permission	Carex	taxon	Carex bullata	Canada	United States					Arkansas			Connecticut	Delaware		Georgia									Maine	Maryland	Massachusetts									New Jersey		New York	North Carolina
F:\AUGUST 2010 PIVOT IMAGES\MASTER LINES\carex-bushii.jpg	#57	F:\AUGUST 2010 PIVOT IMAGES\MASTER LINES\carex-bushii.jpg	2010-07-01 14:40:08	C:\January 2011 GLOSS PIVOT DEPLOY TESTS\JAN 04 2011\REAL A-10\A10_files\images\carex-bushii.xml	Carex bushii		Copyright New York Botanical Garden Press - used with permission	Carex	taxon	Carex bushii		United States		Alabama			Arkansas			Connecticut	Delaware		Georgia			Illinois	Indiana	Iowa	Kansas	Kentucky		Maine	Maryland	Massachusetts	Michigan	Minnesota	Mississippi	Missouri		Nebraska					New York	North Carolina		Ohio	Oklahoma
F:\AUGUST 2010 PIVOT IMAGES\MASTER LINES\carex-buxbaumii.jpg	#58	F:\AUGUST 2010 PIVOT IMAGES\MASTER LINES\carex-buxbaumii.jpg	2010-07-01 14:41:46	C:\January 2011 GLOSS PIVOT DEPLOY TESTS\JAN 04 2011\REAL A-10\A10_files\images\carex-buxbaumii.xml	Carex buxbaumii		Copyright New York Botanical Garden Press - used with permission	Carex	taxon	Carex buxbaumii	Canada	United States			Alaska		Arkansas	California	Colorado	Connecticut	Delaware		Georgia		Idaho	Illinois	Indiana	Iowa	Kansas	Kentucky		Maine	Maryland	Massachusetts	Michigan	Minnesota		Missouri	Montana	Nebraska	Nevada	New Hampshire	New Jersey		New York	North Carolina	North Dakota	Ohio
F:\AUGUST 2010 PIVOT IMAGES\MASTER LINES\carex-californica.jpg	#59	F:\AUGUST 2010 PIVOT IMAGES\MASTER LINES\carex-californica.jpg	2010-07-01 14:37:21	C:\January 2011 GLOSS PIVOT DEPLOY TESTS\JAN 04 2011\REAL A-10\A10_files\images\carex-californica.xml	Carex californica		Copyright New York Botanical Garden Press - used with permission	Carex	taxon	Carex californica		United States						California							Idaho
F:\AUGUST 2010 PIVOT IMAGES\MASTER LINES\carex-canescens.jpg	#60	F:\AUGUST 2010 PIVOT IMAGES\MASTER LINES\carex-canescens.jpg	2010-07-01 14:32:24	C:\January 2011 GLOSS PIVOT DEPLOY TESTS\JAN 04 2011\REAL A-10\A10_files\images\carex-canescens.xml	Carex canescens		Copyright New York Botanical Garden Press - used with permission	Carex	taxon	Carex canescens	Canada	United States			Alaska	Arizona		California	Colorado	Connecticut	Delaware				Idaho		Indiana					Maine	Maryland	Massachusetts	Michigan	Minnesota			Montana		Nevada	New Hampshire	New Jersey	New Mexico	New York			Ohio
F:\AUGUST 2010 PIVOT IMAGES\MASTER LINES\carex-capillaris.jpg	#61	F:\AUGUST 2010 PIVOT IMAGES\MASTER LINES\carex-capillaris.jpg	2010-07-01 14:45:51	C:\January 2011 GLOSS PIVOT DEPLOY TESTS\JAN 04 2011\REAL A-10\A10_files\images\carex-capillaris.xml	Carex capillaris		Copyright New York Botanical Garden Press - used with permission	Carex	taxon	Carex capillaris	Canada	United States			Alaska			California	Colorado						Idaho							Maine			Michigan	Minnesota			Montana		Nevada	New Hampshire		New Mexico	New York	North Carolina
F:\AUGUST 2010 PIVOT IMAGES\MASTER LINES\carex-capitata.jpg	#62	F:\AUGUST 2010 PIVOT IMAGES\MASTER LINES\carex-capitata.jpg	2010-07-01 14:29:52	C:\January 2011 GLOSS PIVOT DEPLOY TESTS\JAN 04 2011\REAL A-10\A10_files\images\carex-capitata.xml	Carex capitata		Copyright New York Botanical Garden Press - used with permission	Carex	taxon	Carex capitata	Canada	United States	Mexico		Alaska			California	Colorado																				Montana		Nevada	New Hampshire
F:\AUGUST 2010 PIVOT IMAGES\MASTER LINES\carex-careyana.jpg	#63	F:\AUGUST 2010 PIVOT IMAGES\MASTER LINES\carex-careyana.jpg	2010-07-01 14:37:28	C:\January 2011 GLOSS PIVOT DEPLOY TESTS\JAN 04 2011\REAL A-10\A10_files\images\carex-careyana.xml	Carex careyana		Copyright New York Botanical Garden Press - used with permission	Carex	taxon	Carex careyana	Canada	United States		Alabama			Arkansas						Georgia			Illinois	Indiana	Iowa		Kentucky			Maryland		Michigan	Minnesota		Missouri							New York	North Carolina		Ohio
F:\AUGUST 2010 PIVOT IMAGES\MASTER LINES\carex-caroliniana.jpg	#64	F:\AUGUST 2010 PIVOT IMAGES\MASTER LINES\carex-caroliniana.jpg	2010-07-01 14:40:06	C:\January 2011 GLOSS PIVOT DEPLOY TESTS\JAN 04 2011\REAL A-10\A10_files\images\carex-caroliniana.xml	Carex caroliniana		Copyright New York Botanical Garden Press - used with permission	Carex	taxon	Carex caroliniana		United States		Alabama			Arkansas				Delaware	Florida	Georgia			Illinois	Indiana		Kansas	Kentucky	Louisiana		Maryland				Mississippi	Missouri					New Jersey		New York	North Carolina		Ohio	Oklahoma
F:\AUGUST 2010 PIVOT IMAGES\MASTER LINES\carex-caryophyllea.jpg	#65	F:\AUGUST 2010 PIVOT IMAGES\MASTER LINES\carex-caryophyllea.jpg	2010-07-01 14:35:22	C:\January 2011 GLOSS PIVOT DEPLOY TESTS\JAN 04 2011\REAL A-10\A10_files\images\carex-caryophyllea.xml	Carex caryophyllea		Copyright New York Botanical Garden Press - used with permission	Carex	taxon	Carex caryophyllea	Canada	United States																				Maine	Maryland	Massachusetts											New York
F:\AUGUST 2010 PIVOT IMAGES\MASTER LINES\carex-castanea.jpg	#66	F:\AUGUST 2010 PIVOT IMAGES\MASTER LINES\carex-castanea.jpg	2010-07-01 14:45:34	C:\January 2011 GLOSS PIVOT DEPLOY TESTS\JAN 04 2011\REAL A-10\A10_files\images\carex-castanea.xml	Carex castanea		Copyright New York Botanical Garden Press - used with permission	Carex	taxon	Carex castanea	Canada	United States								Connecticut												Maine			Michigan	Minnesota						New Hampshire			New York
F:\AUGUST 2010 PIVOT IMAGES\MASTER LINES\carex-cephaloidea.jpg	#67	F:\AUGUST 2010 PIVOT IMAGES\MASTER LINES\carex-cephaloidea.jpg	2010-07-01 14:44:59	C:\January 2011 GLOSS PIVOT DEPLOY TESTS\JAN 04 2011\REAL A-10\A10_files\images\carex-cephaloidea.xml	Carex cephaloidea		Copyright New York Botanical Garden Press - used with permission	Carex	taxon	Carex cephaloidea	Canada	United States								Connecticut						Illinois	Indiana	Iowa				Maine	Maryland	Massachusetts	Michigan							New Hampshire	New Jersey		New York			Ohio
F:\AUGUST 2010 PIVOT IMAGES\MASTER LINES\carex-cephalophora.jpg	#68	F:\AUGUST 2010 PIVOT IMAGES\MASTER LINES\carex-cephalophora.jpg	2010-07-01 14:30:45	C:\January 2011 GLOSS PIVOT DEPLOY TESTS\JAN 04 2011\REAL A-10\A10_files\images\carex-cephalophora.xml	Carex cephalophora		Copyright New York Botanical Garden Press - used with permission	Carex	taxon	Carex cephalophora	Canada	United States		Alabama			Arkansas			Connecticut	Delaware	Florida	Georgia			Illinois	Indiana	Iowa	Kansas	Kentucky	Louisiana	Maine	Maryland	Massachusetts	Michigan	Minnesota	Mississippi	Missouri		Nebraska		New Hampshire	New Jersey	New Mexico		North Carolina		Ohio	Oklahoma
F:\AUGUST 2010 PIVOT IMAGES\MASTER LINES\carex-chalciolepis.jpg	#69	F:\AUGUST 2010 PIVOT IMAGES\MASTER LINES\carex-chalciolepis.jpg	2010-07-01 14:41:38	C:\January 2011 GLOSS PIVOT DEPLOY TESTS\JAN 04 2011\REAL A-10\A10_files\images\carex-chalciolepis.xml	Carex chalciolepis		Copyright New York Botanical Garden Press - used with permission	Carex	taxon	Carex chalciolepis		United States				Arizona			Colorado																				Montana		Nevada			New Mexico
F:\AUGUST 2010 PIVOT IMAGES\MASTER LINES\carex-chapmannii.jpg	#70	F:\AUGUST 2010 PIVOT IMAGES\MASTER LINES\carex-chapmannii.jpg	2010-07-01 14:37:23	C:\January 2011 GLOSS PIVOT DEPLOY TESTS\JAN 04 2011\REAL A-10\A10_files\images\carex-chapmannii.xml	Carex chapmanii		Copyright New York Botanical Garden Press - used with permission	Carex	taxon	Carex chapmanii		United States										Florida	Georgia																							North Carolina
F:\AUGUST 2010 PIVOT IMAGES\MASTER LINES\carex-cherokeensis.jpg	#71	F:\AUGUST 2010 PIVOT IMAGES\MASTER LINES\carex-cherokeensis.jpg	2010-07-01 14:39:18	C:\January 2011 GLOSS PIVOT DEPLOY TESTS\JAN 04 2011\REAL A-10\A10_files\images\carex-cherokeensis.xml	Carex cherokeensis		Copyright New York Botanical Garden Press - used with permission	Carex	taxon	Carex cherokeensis		United States		Alabama			Arkansas					Florida	Georgia							Kentucky	Louisiana						Mississippi	Missouri								North Carolina			Oklahoma
F:\AUGUST 2010 PIVOT IMAGES\MASTER LINES\carex-chihuahuensis.jpg	#72	F:\AUGUST 2010 PIVOT IMAGES\MASTER LINES\carex-chihuahuensis.jpg	2010-07-01 14:31:50	C:\January 2011 GLOSS PIVOT DEPLOY TESTS\JAN 04 2011\REAL A-10\A10_files\images\carex-chihuahuensis.xml	Carex chihuahuensis		Copyright New York Botanical Garden Press - used with permission	Carex	taxon	Carex chihuahuensis		United States	Mexico			Arizona
F:\AUGUST 2010 PIVOT IMAGES\MASTER LINES\carex-chordorrhiza.jpg	#73	F:\AUGUST 2010 PIVOT IMAGES\MASTER LINES\carex-chordorrhiza.jpg	2010-07-01 14:30:29	C:\January 2011 GLOSS PIVOT DEPLOY TESTS\JAN 04 2011\REAL A-10\A10_files\images\carex-chordorrhiza.xml	Carex chordorrhiza		Copyright New York Botanical Garden Press - used with permission	Carex	taxon	Carex chordorrhiza	Canada	United States			Alaska											Illinois	Indiana	Iowa				Maine			Michigan	Minnesota			Montana			New Hampshire			New York
F:\AUGUST 2010 PIVOT IMAGES\MASTER LINES\carex-circinata.jpg	#74	F:\AUGUST 2010 PIVOT IMAGES\MASTER LINES\carex-circinata.jpg	2010-07-01 14:29:59	C:\January 2011 GLOSS PIVOT DEPLOY TESTS\JAN 04 2011\REAL A-10\A10_files\images\carex-circinata.xml	Carex circinata		Copyright New York Botanical Garden Press - used with permission	Carex	taxon	Carex circinata	Canada	United States			Alaska
F:\AUGUST 2010 PIVOT IMAGES\MASTER LINES\carex-collinsii.jpg	#75	F:\AUGUST 2010 PIVOT IMAGES\MASTER LINES\carex-collinsii.jpg	2010-07-01 14:43:14	C:\January 2011 GLOSS PIVOT DEPLOY TESTS\JAN 04 2011\REAL A-10\A10_files\images\carex-collinsii.xml	Carex collinsii		Copyright New York Botanical Garden Press - used with permission	Carex	taxon	Carex collinsii		United States								Connecticut	Delaware		Georgia										Maryland										New Jersey		New York	North Carolina
F:\AUGUST 2010 PIVOT IMAGES\MASTER LINES\carex-communis.jpg	#76	F:\AUGUST 2010 PIVOT IMAGES\MASTER LINES\carex-communis.jpg	2010-07-01 14:35:39	C:\January 2011 GLOSS PIVOT DEPLOY TESTS\JAN 04 2011\REAL A-10\A10_files\images\carex-communis.xml	Carex communis		Copyright New York Botanical Garden Press - used with permission	Carex	taxon	Carex communis	Canada	United States		Alabama			Arkansas			Connecticut	Delaware		Georgia			Illinois	Indiana	Iowa		Kentucky		Maine	Maryland	Massachusetts	Michigan	Minnesota	Mississippi	Missouri				New Hampshire	New Jersey	New Mexico		North Carolina		Ohio	Oklahoma
F:\AUGUST 2010 PIVOT IMAGES\MASTER LINES\carex-comosa.jpg	#77	F:\AUGUST 2010 PIVOT IMAGES\MASTER LINES\carex-comosa.jpg	2010-07-01 14:43:26	C:\January 2011 GLOSS PIVOT DEPLOY TESTS\JAN 04 2011\REAL A-10\A10_files\images\carex-comosa.xml	Carex comosa		Copyright New York Botanical Garden Press - used with permission	Carex	taxon	Carex comosa	Canada	United States	Mexico	Alabama			Arkansas	California		Connecticut	Delaware	Florida	Georgia		Idaho	Illinois	Indiana	Iowa		Kentucky	Louisiana	Maine	Maryland	Massachusetts	Michigan	Minnesota	Mississippi	Missouri	Montana	Nebraska		New Hampshire	New Jersey		New York	North Carolina		Ohio
F:\AUGUST 2010 PIVOT IMAGES\MASTER LINES\carex-complanata.jpg	#78	F:\AUGUST 2010 PIVOT IMAGES\MASTER LINES\carex-complanata.jpg	2010-07-01 14:40:03	C:\January 2011 GLOSS PIVOT DEPLOY TESTS\JAN 04 2011\REAL A-10\A10_files\images\carex-complanata.xml	Carex complanata		Copyright New York Botanical Garden Press - used with permission	Carex	taxon	Carex complanata		United States	Mexico	Alabama			Arkansas				Delaware	Florida	Georgia					Iowa			Louisiana		Maryland				Mississippi	Missouri					New Jersey			North Carolina
F:\AUGUST 2010 PIVOT IMAGES\MASTER LINES\carex-concinna.jpg	#79	F:\AUGUST 2010 PIVOT IMAGES\MASTER LINES\carex-concinna.jpg	2010-07-01 14:36:19	C:\January 2011 GLOSS PIVOT DEPLOY TESTS\JAN 04 2011\REAL A-10\A10_files\images\carex-concinna.xml	Carex concinna		Copyright New York Botanical Garden Press - used with permission	Carex	taxon	Carex concinna	Canada	United States			Alaska				Colorado																Michigan				Montana
F:\AUGUST 2010 PIVOT IMAGES\MASTER LINES\carex-concinnoides.jpg	#80	F:\AUGUST 2010 PIVOT IMAGES\MASTER LINES\carex-concinnoides.jpg	2010-07-01 14:36:21	C:\January 2011 GLOSS PIVOT DEPLOY TESTS\JAN 04 2011\REAL A-10\A10_files\images\carex-concinnoides.xml	Carex concinnoides		Copyright New York Botanical Garden Press - used with permission	Carex	taxon	Carex concinnoides	Canada	United States						California							Idaho														Montana
F:\AUGUST 2010 PIVOT IMAGES\MASTER LINES\carex-conjuncta.jpg	#81	F:\AUGUST 2010 PIVOT IMAGES\MASTER LINES\carex-conjuncta.jpg	2010-07-01 14:32:00	C:\January 2011 GLOSS PIVOT DEPLOY TESTS\JAN 04 2011\REAL A-10\A10_files\images\carex-conjuncta.xml	Carex conjuncta		Copyright New York Botanical Garden Press - used with permission	Carex	taxon	Carex conjuncta		United States		Alabama			Arkansas				Delaware					Illinois	Indiana	Iowa	Kansas	Kentucky			Maryland		Michigan	Minnesota		Missouri		Nebraska			New Jersey		New York			Ohio
F:\AUGUST 2010 PIVOT IMAGES\MASTER LINES\carex-conoidea.jpg	#82	F:\AUGUST 2010 PIVOT IMAGES\MASTER LINES\carex-conoidea.jpg	2010-07-01 14:38:12	C:\January 2011 GLOSS PIVOT DEPLOY TESTS\JAN 04 2011\REAL A-10\A10_files\images\carex-conoidea.xml	Carex conoidea		Copyright New York Botanical Garden Press - used with permission	Carex	taxon	Carex conoidea	Canada	United States				Arizona				Connecticut	Delaware					Illinois	Indiana	Iowa				Maine		Massachusetts	Michigan	Minnesota		Missouri				New Hampshire	New Jersey		New York	North Carolina		Ohio
F:\AUGUST 2010 PIVOT IMAGES\MASTER LINES\carex-crawei.jpg	#83	F:\AUGUST 2010 PIVOT IMAGES\MASTER LINES\carex-crawei.jpg	2010-07-01 14:38:04	C:\January 2011 GLOSS PIVOT DEPLOY TESTS\JAN 04 2011\REAL A-10\A10_files\images\carex-crawei.xml	Carex crawei		Copyright New York Botanical Garden Press - used with permission	Carex	taxon	Carex crawei	Canada	United States		Alabama	Alaska		Arkansas			Connecticut			Georgia		Idaho	Illinois	Indiana	Iowa	Kansas	Kentucky		Maine			Michigan	Minnesota	Mississippi	Missouri	Montana	Nebraska			New Jersey		New York		North Dakota	Ohio	Oklahoma
F:\AUGUST 2010 PIVOT IMAGES\MASTER LINES\carex-crawfordii.jpg	#84	F:\AUGUST 2010 PIVOT IMAGES\MASTER LINES\carex-crawfordii.jpg	2010-07-01 14:34:06	C:\January 2011 GLOSS PIVOT DEPLOY TESTS\JAN 04 2011\REAL A-10\A10_files\images\carex-crawfordii.xml	Carex crawfordii		Copyright New York Botanical Garden Press - used with permission	Carex	taxon	Carex crawfordii	Canada	United States			Alaska					Connecticut					Idaho	Illinois		Iowa				Maine		Massachusetts	Michigan	Minnesota		Missouri	Montana			New Hampshire	New Jersey
F:\AUGUST 2010 PIVOT IMAGES\MASTER LINES\carex-crebriflora.jpg	#85	F:\AUGUST 2010 PIVOT IMAGES\MASTER LINES\carex-crebriflora.jpg	2010-07-01 14:37:52	C:\January 2011 GLOSS PIVOT DEPLOY TESTS\JAN 04 2011\REAL A-10\A10_files\images\carex-crebriflora.xml	Carex crebriflora		Copyright New York Botanical Garden Press - used with permission	Carex	taxon	Carex crebriflora		United States		Alabama			Arkansas					Florida	Georgia							Kentucky	Louisiana						Mississippi									North Carolina			Oklahoma
F:\AUGUST 2010 PIVOT IMAGES\MASTER LINES\carex-crinita.jpg	#86	F:\AUGUST 2010 PIVOT IMAGES\MASTER LINES\carex-crinita.jpg	2010-07-01 14:42:51	C:\January 2011 GLOSS PIVOT DEPLOY TESTS\JAN 04 2011\REAL A-10\A10_files\images\carex-crinita.xml	Carex crinita		Copyright New York Botanical Garden Press - used with permission	Carex	taxon	Carex crinita		United States		Alabama			Arkansas			Connecticut	Delaware		Georgia							Kentucky	Louisiana		Maryland	Massachusetts			Mississippi	Missouri		Nebraska			New Jersey		New York	North Carolina		Ohio	Oklahoma
F:\AUGUST 2010 PIVOT IMAGES\MASTER LINES\carex-cristatella.jpg	#87	F:\AUGUST 2010 PIVOT IMAGES\MASTER LINES\carex-cristatella.jpg	2010-07-01 14:34:50	C:\January 2011 GLOSS PIVOT DEPLOY TESTS\JAN 04 2011\REAL A-10\A10_files\images\carex-cristatella.xml	Carex cristatella		Copyright New York Botanical Garden Press - used with permission	Carex	taxon	Carex cristatella	Canada	United States								Connecticut	Delaware					Illinois	Indiana	Iowa	Kansas	Kentucky			Maryland	Massachusetts	Michigan	Minnesota		Missouri		Nebraska		New Hampshire	New Jersey		New York	North Carolina		Ohio
F:\AUGUST 2010 PIVOT IMAGES\MASTER LINES\carex-crus-corvi.jpg	#88	F:\AUGUST 2010 PIVOT IMAGES\MASTER LINES\carex-crus-corvi.jpg	2010-07-01 14:31:59	C:\January 2011 GLOSS PIVOT DEPLOY TESTS\JAN 04 2011\REAL A-10\A10_files\images\carex-crus-corvi.xml	Carex crus-corvi		Copyright New York Botanical Garden Press - used with permission	Carex	taxon	Carex crus-corvi	Canada	United States		Alabama			Arkansas					Florida	Georgia			Illinois	Indiana	Iowa	Kansas	Kentucky	Louisiana				Michigan	Minnesota		Missouri		Nebraska						North Carolina		Ohio	Oklahoma
F:\AUGUST 2010 PIVOT IMAGES\MASTER LINES\carex-cryptolepis.jpg	#89	F:\AUGUST 2010 PIVOT IMAGES\MASTER LINES\carex-cryptolepis.jpg	2010-07-01 14:39:30	C:\January 2011 GLOSS PIVOT DEPLOY TESTS\JAN 04 2011\REAL A-10\A10_files\images\carex-cryptolepis.xml	Carex cryptolepis		Copyright New York Botanical Garden Press - used with permission	Carex	taxon	Carex cryptolepis	Canada	United States								Connecticut						Illinois	Indiana					Maine		Massachusetts	Michigan	Minnesota						New Hampshire	New Jersey		New York			Ohio
F:\AUGUST 2010 PIVOT IMAGES\MASTER LINES\carex-cumulata.jpg	#90	F:\AUGUST 2010 PIVOT IMAGES\MASTER LINES\carex-cumulata.jpg	2010-07-01 14:34:42	C:\January 2011 GLOSS PIVOT DEPLOY TESTS\JAN 04 2011\REAL A-10\A10_files\images\carex-cumulata.xml	Carex cumulata		Copyright New York Botanical Garden Press - used with permission	Carex	taxon	Carex cumulata	Canada	United States								Connecticut						Illinois	Indiana					Maine		Massachusetts	Michigan							New Hampshire	New Jersey		New York
F:\AUGUST 2010 PIVOT IMAGES\MASTER LINES\carex-cusickii.jpg	#91	F:\AUGUST 2010 PIVOT IMAGES\MASTER LINES\carex-cusickii.jpg	2010-07-01 14:31:43	C:\January 2011 GLOSS PIVOT DEPLOY TESTS\JAN 04 2011\REAL A-10\A10_files\images\carex-cusickii.xml	Carex cusickii		Copyright New York Botanical Garden Press - used with permission	Carex	taxon	Carex cusickii	Canada	United States						California							Idaho														Montana
F:\AUGUST 2010 PIVOT IMAGES\MASTER LINES\carex-dasycarpa.jpg	#92	F:\AUGUST 2010 PIVOT IMAGES\MASTER LINES\carex-dasycarpa.jpg	2010-07-01 14:36:29	C:\January 2011 GLOSS PIVOT DEPLOY TESTS\JAN 04 2011\REAL A-10\A10_files\images\carex-dasycarpa.xml	Carex dasycarpa		Copyright New York Botanical Garden Press - used with permission	Carex	taxon	Carex dasycarpa		United States		Alabama								Florida	Georgia														Mississippi
F:\AUGUST 2010 PIVOT IMAGES\MASTER LINES\carex-davisii.jpg	#93	F:\AUGUST 2010 PIVOT IMAGES\MASTER LINES\carex-davisii.jpg	2010-07-01 14:38:44	C:\January 2011 GLOSS PIVOT DEPLOY TESTS\JAN 04 2011\REAL A-10\A10_files\images\carex-davisii.xml	Carex davisii		Copyright New York Botanical Garden Press - used with permission	Carex	taxon	Carex davisii	Canada	United States					Arkansas			Connecticut	Delaware					Illinois	Indiana	Iowa	Kansas	Kentucky			Maryland	Massachusetts	Michigan	Minnesota		Missouri		Nebraska			New Jersey		New York			Ohio	Oklahoma
F:\AUGUST 2010 PIVOT IMAGES\MASTER LINES\carex-davyi.jpg	#94	F:\AUGUST 2010 PIVOT IMAGES\MASTER LINES\carex-davyi.jpg	2010-07-01 14:34:00	C:\January 2011 GLOSS PIVOT DEPLOY TESTS\JAN 04 2011\REAL A-10\A10_files\images\carex-davyi.xml	Carex davyi		Copyright New York Botanical Garden Press - used with permission	Carex	taxon	Carex davyi		United States						California
F:\AUGUST 2010 PIVOT IMAGES\MASTER LINES\carex-debilis.jpg	#95	F:\AUGUST 2010 PIVOT IMAGES\MASTER LINES\carex-debilis.jpg	2010-07-01 14:45:39	C:\January 2011 GLOSS PIVOT DEPLOY TESTS\JAN 04 2011\REAL A-10\A10_files\images\carex-debilis.xml	Carex debilis		Copyright New York Botanical Garden Press - used with permission	Carex	taxon	Carex debilis	Canada	United States		Alabama			Arkansas			Connecticut	Delaware	Florida	Georgia			Illinois	Indiana			Kentucky	Louisiana	Maine	Maryland	Massachusetts	Michigan	Minnesota	Mississippi	Missouri				New Hampshire	New Jersey		New York	North Carolina		Ohio	Oklahoma
F:\AUGUST 2010 PIVOT IMAGES\MASTER LINES\carex-decomposita.jpg	#96	F:\AUGUST 2010 PIVOT IMAGES\MASTER LINES\carex-decomposita.jpg	2010-07-01 14:31:38	C:\January 2011 GLOSS PIVOT DEPLOY TESTS\JAN 04 2011\REAL A-10\A10_files\images\carex-decomposita.xml	Carex decomposita		Copyright New York Botanical Garden Press - used with permission	Carex	taxon	Carex decomposita		United States		Alabama			Arkansas					Florida	Georgia			Illinois	Indiana			Kentucky	Louisiana		Maryland		Michigan		Mississippi	Missouri							New York	North Carolina		Ohio	Oklahoma
F:\AUGUST 2010 PIVOT IMAGES\MASTER LINES\carex-deflexa.jpg	#97	F:\AUGUST 2010 PIVOT IMAGES\MASTER LINES\carex-deflexa.jpg	2010-07-01 14:35:51	C:\January 2011 GLOSS PIVOT DEPLOY TESTS\JAN 04 2011\REAL A-10\A10_files\images\carex-deflexa.xml	Carex deflexa		Copyright New York Botanical Garden Press - used with permission	Carex	taxon	Carex deflexa	Canada	United States			Alaska			California	Colorado	Connecticut					Idaho							Maine		Massachusetts	Michigan	Minnesota			Montana			New Hampshire			New York	North Carolina	North Dakota
F:\AUGUST 2010 PIVOT IMAGES\MASTER LINES\carex-densa.jpg	#98	F:\AUGUST 2010 PIVOT IMAGES\MASTER LINES\carex-densa.jpg	2010-07-01 14:31:23	C:\January 2011 GLOSS PIVOT DEPLOY TESTS\JAN 04 2011\REAL A-10\A10_files\images\carex-densa.xml	Carex densa		Copyright New York Botanical Garden Press - used with permission	Carex	taxon	Carex densa		United States	Mexico					California
F:\AUGUST 2010 PIVOT IMAGES\MASTER LINES\carex-deweyana.jpg	#99	F:\AUGUST 2010 PIVOT IMAGES\MASTER LINES\carex-deweyana.jpg	2010-07-01 14:33:02	C:\January 2011 GLOSS PIVOT DEPLOY TESTS\JAN 04 2011\REAL A-10\A10_files\images\carex-deweyana.xml	Carex deweyana		Copyright New York Botanical Garden Press - used with permission	Carex	taxon	Carex deweyana	Canada	United States			Alaska				Colorado	Connecticut						Illinois		Iowa				Maine		Massachusetts	Michigan	Minnesota			Montana			New Hampshire	New Jersey	New Mexico	New York		North Dakota	Ohio
F:\AUGUST 2010 PIVOT IMAGES\MASTER LINES\carex-diandra.jpg	#100	F:\AUGUST 2010 PIVOT IMAGES\MASTER LINES\carex-diandra.jpg	2010-07-01 14:31:40	C:\January 2011 GLOSS PIVOT DEPLOY TESTS\JAN 04 2011\REAL A-10\A10_files\images\carex-diandra.xml	Carex diandra		Copyright New York Botanical Garden Press - used with permission	Carex	taxon	Carex diandra	Canada	United States			Alaska			California	Colorado	Connecticut						Illinois	Indiana	Iowa				Maine	Maryland	Massachusetts	Michigan	Minnesota	Mississippi	Missouri	Montana	Nebraska	Nevada	New Hampshire	New Jersey		New York		North Dakota	Ohio
F:\AUGUST 2010 PIVOT IMAGES\MASTER LINES\carex-digitalis.jpg	#101	F:\AUGUST 2010 PIVOT IMAGES\MASTER LINES\carex-digitalis.jpg	2010-07-01 14:37:35	C:\January 2011 GLOSS PIVOT DEPLOY TESTS\JAN 04 2011\REAL A-10\A10_files\images\carex-digitalis.xml	Carex digitalis		Copyright New York Botanical Garden Press - used with permission	Carex	taxon	Carex digitalis	Canada	United States		Alabama			Arkansas			Connecticut		Florida	Georgia			Illinois	Indiana			Kentucky	Louisiana	Maine	Maryland	Massachusetts	Michigan	Minnesota	Mississippi	Missouri				New Hampshire	New Jersey		New York	North Carolina		Ohio	Oklahoma
F:\AUGUST 2010 PIVOT IMAGES\MASTER LINES\carex-disperma.jpg	#102	F:\AUGUST 2010 PIVOT IMAGES\MASTER LINES\carex-disperma.jpg	2010-07-01 14:32:04	C:\January 2011 GLOSS PIVOT DEPLOY TESTS\JAN 04 2011\REAL A-10\A10_files\images\carex-disperma.xml	Carex disperma		Copyright New York Botanical Garden Press - used with permission	Carex	taxon	Carex disperma	Canada	United States			Alaska	Arizona		California	Colorado	Connecticut					Idaho	Illinois	Indiana					Maine		Massachusetts	Michigan	Minnesota			Montana		Nevada	New Hampshire	New Jersey	New Mexico	New York		North Dakota	Ohio
F:\AUGUST 2010 PIVOT IMAGES\MASTER LINES\carex-donnell-smithii.jpg	#103	F:\AUGUST 2010 PIVOT IMAGES\MASTER LINES\carex-donnell-smithii.jpg	2010-07-01 14:40:36	C:\January 2011 GLOSS PIVOT DEPLOY TESTS\JAN 04 2011\REAL A-10\A10_files\images\carex-donnell-smithii.xml	Carex donnell-smithii		Copyright New York Botanical Garden Press - used with permission	Carex	taxon	Carex donnell-smithii			Mexico
F:\AUGUST 2010 PIVOT IMAGES\MASTER LINES\carex-douglasii.jpg	#104	F:\AUGUST 2010 PIVOT IMAGES\MASTER LINES\carex-douglasii.jpg	2010-07-01 14:30:14	C:\January 2011 GLOSS PIVOT DEPLOY TESTS\JAN 04 2011\REAL A-10\A10_files\images\carex-douglasii.xml	Carex douglasii		Copyright New York Botanical Garden Press - used with permission	Carex	taxon	Carex douglasii	Canada	United States	Mexico			Arizona		California	Colorado						Idaho													Missouri	Montana	Nebraska	Nevada			New Mexico			North Dakota
F:\AUGUST 2010 PIVOT IMAGES\MASTER LINES\carex-ebenea.jpg	#105	F:\AUGUST 2010 PIVOT IMAGES\MASTER LINES\carex-ebenea.jpg	2010-07-01 14:33:11	C:\January 2011 GLOSS PIVOT DEPLOY TESTS\JAN 04 2011\REAL A-10\A10_files\images\carex-ebenea.xml	Carex ebenea		Copyright New York Botanical Garden Press - used with permission	Carex	taxon	Carex ebenea		United States				Arizona			Colorado																									New Mexico
F:\AUGUST 2010 PIVOT IMAGES\MASTER LINES\carex-eburnea.jpg	#106	F:\AUGUST 2010 PIVOT IMAGES\MASTER LINES\carex-eburnea.jpg	2010-07-01 14:36:44	C:\January 2011 GLOSS PIVOT DEPLOY TESTS\JAN 04 2011\REAL A-10\A10_files\images\carex-eburnea.xml	Carex eburnea		Copyright New York Botanical Garden Press - used with permission	Carex	taxon	Carex eburnea	Canada	United States	Mexico	Alabama	Alaska		Arkansas			Connecticut			Georgia			Illinois	Indiana	Iowa		Kentucky		Maine	Maryland	Massachusetts	Michigan	Minnesota		Missouri	Montana	Nebraska		New Hampshire	New Jersey		New York	North Carolina	North Dakota	Ohio
F:\AUGUST 2010 PIVOT IMAGES\MASTER LINES\carex-eggelstonii.jpg	#107	F:\AUGUST 2010 PIVOT IMAGES\MASTER LINES\carex-eggelstonii.jpg	2010-07-01 14:34:26	C:\January 2011 GLOSS PIVOT DEPLOY TESTS\JAN 04 2011\REAL A-10\A10_files\images\carex-eggelstonii.xml	Carex egglestonii		Copyright New York Botanical Garden Press - used with permission	Carex	taxon	Carex egglestonii		United States							Colorado
F:\AUGUST 2010 PIVOT IMAGES\MASTER LINES\carex-elliotii.jpg	#108	F:\AUGUST 2010 PIVOT IMAGES\MASTER LINES\carex-elliotii.jpg	2010-07-01 14:44:15	C:\January 2011 GLOSS PIVOT DEPLOY TESTS\JAN 04 2011\REAL A-10\A10_files\images\carex-elliotii.xml	Carex elliottii		Copyright New York Botanical Garden Press - used with permission	Carex	taxon	Carex elliottii		United States		Alabama								Florida	Georgia																							North Carolina
F:\AUGUST 2010 PIVOT IMAGES\MASTER LINES\carex-elynoides.jpg	#109	F:\AUGUST 2010 PIVOT IMAGES\MASTER LINES\carex-elynoides.jpg	2010-07-01 14:35:16	C:\January 2011 GLOSS PIVOT DEPLOY TESTS\JAN 04 2011\REAL A-10\A10_files\images\carex-elynoides.xml	Carex elynoides		Copyright New York Botanical Garden Press - used with permission	Carex	taxon	Carex elynoides		United States							Colorado						Idaho														Montana		Nevada			New Mexico
F:\AUGUST 2010 PIVOT IMAGES\MASTER LINES\carex-emoryi.jpg	#110	F:\AUGUST 2010 PIVOT IMAGES\MASTER LINES\carex-emoryi.jpg	2010-07-01 14:42:33	C:\January 2011 GLOSS PIVOT DEPLOY TESTS\JAN 04 2011\REAL A-10\A10_files\images\carex-emoryi.xml	Carex emoryi		Copyright New York Botanical Garden Press - used with permission	Carex	taxon	Carex emoryi	Canada	United States	Mexico				Arkansas		Colorado	Connecticut	Delaware					Illinois	Indiana	Iowa	Kansas				Maryland		Michigan	Minnesota		Missouri		Nebraska			New Jersey	New Mexico	New York		North Dakota	Ohio	Oklahoma
F:\AUGUST 2010 PIVOT IMAGES\MASTER LINES\carex-engelmannii.jpg	#111	F:\AUGUST 2010 PIVOT IMAGES\MASTER LINES\carex-engelmannii.jpg	2010-07-01 14:29:53	C:\January 2011 GLOSS PIVOT DEPLOY TESTS\JAN 04 2011\REAL A-10\A10_files\images\carex-engelmannii.xml	Carex engelmannii		Copyright New York Botanical Garden Press - used with permission	Carex	taxon	Carex engelmannii	Canada	United States							Colorado						Idaho														Montana		Nevada
F:\AUGUST 2010 PIVOT IMAGES\MASTER LINES\carex-epapillosa.jpg	#112	F:\AUGUST 2010 PIVOT IMAGES\MASTER LINES\carex-epapillosa.jpg	2010-07-01 14:45:58	C:\January 2011 GLOSS PIVOT DEPLOY TESTS\JAN 04 2011\REAL A-10\A10_files\images\carex-epapillosa.xml	Carex epapillosa		Copyright New York Botanical Garden Press - used with permission	Carex	taxon	Carex epapillosa	Canada	United States						California	Colorado						Idaho														Montana		Nevada
F:\AUGUST 2010 PIVOT IMAGES\MASTER LINES\carex-exilis.jpg	#113	F:\AUGUST 2010 PIVOT IMAGES\MASTER LINES\carex-exilis.jpg	2010-07-01 14:32:29	C:\January 2011 GLOSS PIVOT DEPLOY TESTS\JAN 04 2011\REAL A-10\A10_files\images\carex-exilis.xml	Carex exilis		Copyright New York Botanical Garden Press - used with permission	Carex	taxon	Carex exilis	Canada	United States		Alabama							Delaware											Maine	Maryland	Massachusetts	Michigan	Minnesota	Mississippi					New Hampshire	New Jersey		New York	North Carolina
F:\AUGUST 2010 PIVOT IMAGES\MASTER LINES\carex-exsiccata.jpg	#114	F:\AUGUST 2010 PIVOT IMAGES\MASTER LINES\carex-exsiccata.jpg	2010-07-01 14:44:02	C:\January 2011 GLOSS PIVOT DEPLOY TESTS\JAN 04 2011\REAL A-10\A10_files\images\carex-exsiccata.xml	Carex exsiccata		Copyright New York Botanical Garden Press - used with permission	Carex	taxon	Carex exsiccata	Canada	United States			Alaska			California							Idaho														Montana
F:\AUGUST 2010 PIVOT IMAGES\MASTER LINES\carex-extensa.jpg	#115	F:\AUGUST 2010 PIVOT IMAGES\MASTER LINES\carex-extensa.jpg	2010-07-01 14:39:23	C:\January 2011 GLOSS PIVOT DEPLOY TESTS\JAN 04 2011\REAL A-10\A10_files\images\carex-extensa.xml	Carex extensa		Copyright New York Botanical Garden Press - used with permission	Carex	taxon	Carex extensa		United States																					Maryland												New York
F:\AUGUST 2010 PIVOT IMAGES\MASTER LINES\carex-festucacea.jpg	#116	F:\AUGUST 2010 PIVOT IMAGES\MASTER LINES\carex-festucacea.jpg	2010-07-01 14:34:16	C:\January 2011 GLOSS PIVOT DEPLOY TESTS\JAN 04 2011\REAL A-10\A10_files\images\carex-festucacea.xml	Carex festucacea		Copyright New York Botanical Garden Press - used with permission	Carex	taxon	Carex festucacea	Canada	United States	Mexico	Alabama			Arkansas			Connecticut	Delaware		Georgia			Illinois	Indiana	Iowa	Kansas	Kentucky	Louisiana		Maryland	Massachusetts		Minnesota	Mississippi		Montana				New Jersey		New York	North Carolina		Ohio	Oklahoma
F:\AUGUST 2010 PIVOT IMAGES\MASTER LINES\carex-feta.jpg	#117	F:\AUGUST 2010 PIVOT IMAGES\MASTER LINES\carex-feta.jpg	2010-07-01 14:34:36	C:\January 2011 GLOSS PIVOT DEPLOY TESTS\JAN 04 2011\REAL A-10\A10_files\images\carex-feta.xml	Carex feta		Copyright New York Botanical Garden Press - used with permission	Carex	taxon	Carex feta	Canada	United States						California
F:\AUGUST 2010 PIVOT IMAGES\MASTER LINES\carex-filifolia.jpg	#118	F:\AUGUST 2010 PIVOT IMAGES\MASTER LINES\carex-filifolia.jpg	2010-07-01 14:35:14	C:\January 2011 GLOSS PIVOT DEPLOY TESTS\JAN 04 2011\REAL A-10\A10_files\images\carex-filifolia.xml	Carex filifolia		Copyright New York Botanical Garden Press - used with permission	Carex	taxon	Carex filifolia	Canada	United States			Alaska	Arizona		California	Colorado						Idaho				Kansas							Minnesota			Montana	Nebraska	Nevada			New Mexico			North Dakota
F:\AUGUST 2010 PIVOT IMAGES\MASTER LINES\carex-fissa.jpg	#119	F:\AUGUST 2010 PIVOT IMAGES\MASTER LINES\carex-fissa.jpg	2010-07-01 14:31:21	C:\January 2011 GLOSS PIVOT DEPLOY TESTS\JAN 04 2011\REAL A-10\A10_files\images\carex-fissa.xml	Carex fissa		Copyright New York Botanical Garden Press - used with permission	Carex	taxon	Carex fissa		United States					Arkansas					Florida	Georgia						Kansas		Louisiana						Mississippi	Missouri											Oklahoma
F:\AUGUST 2010 PIVOT IMAGES\MASTER LINES\carex-flacca.jpg	#120	F:\AUGUST 2010 PIVOT IMAGES\MASTER LINES\carex-flacca.jpg	2010-07-01 14:40:44	C:\January 2011 GLOSS PIVOT DEPLOY TESTS\JAN 04 2011\REAL A-10\A10_files\images\carex-flacca.xml	Carex flacca		Copyright New York Botanical Garden Press - used with permission	Carex	taxon	Carex flacca	Canada	United States																							Michigan										New York
F:\AUGUST 2010 PIVOT IMAGES\MASTER LINES\carex-flaccosperma.jpg	#121	F:\AUGUST 2010 PIVOT IMAGES\MASTER LINES\carex-flaccosperma.jpg	2010-07-01 14:38:21	C:\January 2011 GLOSS PIVOT DEPLOY TESTS\JAN 04 2011\REAL A-10\A10_files\images\carex-flaccosperma.xml	Carex flaccosperma		Copyright New York Botanical Garden Press - used with permission	Carex	taxon	Carex flaccosperma		United States		Alabama			Arkansas					Florida	Georgia			Illinois			Kansas	Kentucky	Louisiana						Mississippi	Missouri								North Carolina			Oklahoma
F:\AUGUST 2010 PIVOT IMAGES\MASTER LINES\carex-flava.jpg	#122	F:\AUGUST 2010 PIVOT IMAGES\MASTER LINES\carex-flava.jpg	2010-07-01 14:39:33	C:\January 2011 GLOSS PIVOT DEPLOY TESTS\JAN 04 2011\REAL A-10\A10_files\images\carex-flava.xml	Carex flava		Copyright New York Botanical Garden Press - used with permission	Carex	taxon	Carex flava	Canada	United States			Alaska					Connecticut					Idaho		Indiana					Maine		Massachusetts	Michigan	Minnesota			Montana			New Hampshire	New Jersey		New York			Ohio
F:\AUGUST 2010 PIVOT IMAGES\MASTER LINES\carex-floridana.jpg	#123	F:\AUGUST 2010 PIVOT IMAGES\MASTER LINES\carex-floridana.jpg	2010-07-01 14:35:34	C:\January 2011 GLOSS PIVOT DEPLOY TESTS\JAN 04 2011\REAL A-10\A10_files\images\carex-floridana.xml	Carex floridana		Copyright New York Botanical Garden Press - used with permission	Carex	taxon	Carex floridana		United States		Alabama			Arkansas					Florida	Georgia								Louisiana						Mississippi	Missouri								North Carolina
F:\AUGUST 2010 PIVOT IMAGES\MASTER LINES\carex-foena.jpg	#124	F:\AUGUST 2010 PIVOT IMAGES\MASTER LINES\carex-foena.jpg	2010-07-01 14:35:00	C:\January 2011 GLOSS PIVOT DEPLOY TESTS\JAN 04 2011\REAL A-10\A10_files\images\carex-foena.xml	Carex foenea		Copyright New York Botanical Garden Press - used with permission	Carex	taxon	Carex foenea	Canada	United States			Alaska	Arizona			Colorado	Connecticut	Delaware				Idaho	Illinois	Indiana	Iowa				Maine	Maryland	Massachusetts	Michigan	Minnesota			Montana			New Hampshire	New Jersey	New Mexico	New York	North Carolina	North Dakota
F:\AUGUST 2010 PIVOT IMAGES\MASTER LINES\carex-folliculata.jpg	#125	F:\AUGUST 2010 PIVOT IMAGES\MASTER LINES\carex-folliculata.jpg	2010-07-01 14:43:17	C:\January 2011 GLOSS PIVOT DEPLOY TESTS\JAN 04 2011\REAL A-10\A10_files\images\carex-folliculata.xml	Carex folliculata		Copyright New York Botanical Garden Press - used with permission	Carex	taxon	Carex folliculata	Canada	United States								Connecticut	Delaware		Georgia				Indiana					Maine	Maryland	Massachusetts	Michigan							New Hampshire	New Jersey		New York	North Carolina		Ohio
F:\AUGUST 2010 PIVOT IMAGES\MASTER LINES\carex-formosa.jpg	#126	F:\AUGUST 2010 PIVOT IMAGES\MASTER LINES\carex-formosa.jpg	2010-07-01 14:38:41	C:\January 2011 GLOSS PIVOT DEPLOY TESTS\JAN 04 2011\REAL A-10\A10_files\images\carex-formosa.xml	Carex formosa		Copyright New York Botanical Garden Press - used with permission	Carex	taxon	Carex formosa	Canada	United States								Connecticut						Illinois		Iowa						Massachusetts	Michigan	Minnesota									New York		North Dakota	Ohio
F:\AUGUST 2010 PIVOT IMAGES\MASTER LINES\carex-fracta.jpg	#127	F:\AUGUST 2010 PIVOT IMAGES\MASTER LINES\carex-fracta.jpg	2010-07-01 14:33:45	C:\January 2011 GLOSS PIVOT DEPLOY TESTS\JAN 04 2011\REAL A-10\A10_files\images\carex-fracta.xml	Carex fracta		Copyright New York Botanical Garden Press - used with permission	Carex	taxon	Carex fracta		United States						California
F:\AUGUST 2010 PIVOT IMAGES\MASTER LINES\carex-frankii.jpg	#128	F:\AUGUST 2010 PIVOT IMAGES\MASTER LINES\carex-frankii.jpg	2010-07-01 14:43:46	C:\January 2011 GLOSS PIVOT DEPLOY TESTS\JAN 04 2011\REAL A-10\A10_files\images\carex-frankii.xml	Carex frankii		Copyright New York Botanical Garden Press - used with permission	Carex	taxon	Carex frankii	Canada	United States		Alabama			Arkansas				Delaware	Florida	Georgia			Illinois	Indiana	Iowa	Kansas	Kentucky	Louisiana		Maryland		Michigan		Mississippi	Missouri		Nebraska			New Jersey	New Mexico	New York	North Carolina		Ohio	Oklahoma
F:\AUGUST 2010 PIVOT IMAGES\MASTER LINES\carex-geophila.jpg	#129	F:\AUGUST 2010 PIVOT IMAGES\MASTER LINES\carex-geophila.jpg	2010-07-01 14:35:57	C:\January 2011 GLOSS PIVOT DEPLOY TESTS\JAN 04 2011\REAL A-10\A10_files\images\carex-geophila.xml	Carex geophila		Copyright New York Botanical Garden Press - used with permission	Carex	taxon	Carex geophila		United States	Mexico			Arizona		California	Colorado
F:\AUGUST 2010 PIVOT IMAGES\MASTER LINES\carex-geyeri.jpg	#130	F:\AUGUST 2010 PIVOT IMAGES\MASTER LINES\carex-geyeri.jpg	2010-07-01 14:36:43	C:\January 2011 GLOSS PIVOT DEPLOY TESTS\JAN 04 2011\REAL A-10\A10_files\images\carex-geyeri.xml	Carex geyeri		Copyright New York Botanical Garden Press - used with permission	Carex	taxon	Carex geyeri	Canada	United States						California	Colorado						Idaho														Montana		Nevada			New Mexico
F:\AUGUST 2010 PIVOT IMAGES\MASTER LINES\carex-gigantea.jpg	#131	F:\AUGUST 2010 PIVOT IMAGES\MASTER LINES\carex-gigantea.jpg	2010-07-01 14:46:10	C:\January 2011 GLOSS PIVOT DEPLOY TESTS\JAN 04 2011\REAL A-10\A10_files\images\carex-gigantea.xml	Carex gholsonii		Copyright New York Botanical Garden Press - used with permission	Carex	taxon	Carex gholsonii		United States		Alabama								Florida	Georgia																							North Carolina
F:\AUGUST 2010 PIVOT IMAGES\MASTER LINES\carex-gigantea2.jpg	#132	F:\AUGUST 2010 PIVOT IMAGES\MASTER LINES\carex-gigantea2.jpg	2010-07-01 14:44:31	C:\January 2011 GLOSS PIVOT DEPLOY TESTS\JAN 04 2011\REAL A-10\A10_files\images\carex-gigantea2.xml	Carex gigantea		Copyright New York Botanical Garden Press - used with permission	Carex	taxon	Carex gigantea		United States		Alabama			Arkansas				Delaware	Florida	Georgia			Illinois	Indiana			Kentucky	Louisiana							Missouri								North Carolina			Oklahoma
F:\AUGUST 2010 PIVOT IMAGES\MASTER LINES\carex-glacialis.jpg	#133	F:\AUGUST 2010 PIVOT IMAGES\MASTER LINES\carex-glacialis.jpg	2010-07-01 14:36:39	C:\January 2011 GLOSS PIVOT DEPLOY TESTS\JAN 04 2011\REAL A-10\A10_files\images\carex-glacialis.xml	Carex glacialis		Copyright New York Botanical Garden Press - used with permission	Carex	taxon	Carex glacialis	Canada	United States			Alaska
F:\AUGUST 2010 PIVOT IMAGES\MASTER LINES\carex-glareosa.jpg	#134	F:\AUGUST 2010 PIVOT IMAGES\MASTER LINES\carex-glareosa.jpg	2010-07-01 14:32:16	C:\January 2011 GLOSS PIVOT DEPLOY TESTS\JAN 04 2011\REAL A-10\A10_files\images\carex-glareosa.xml	Carex glareosa		Copyright New York Botanical Garden Press - used with permission	Carex	taxon	Carex glareosa	Canada	United States			Alaska
F:\AUGUST 2010 PIVOT IMAGES\MASTER LINES\carex-glaucescens.jpg	#135	F:\AUGUST 2010 PIVOT IMAGES\MASTER LINES\carex-glaucescens.jpg	2010-07-01 14:40:49	C:\January 2011 GLOSS PIVOT DEPLOY TESTS\JAN 04 2011\REAL A-10\A10_files\images\carex-glaucescens.xml	Carex glaucescens		Copyright New York Botanical Garden Press - used with permission	Carex	taxon	Carex glaucescens		United States		Alabama								Florida	Georgia								Louisiana						Mississippi									North Carolina
F:\AUGUST 2010 PIVOT IMAGES\MASTER LINES\carex-glaucodea.jpg	#136	F:\AUGUST 2010 PIVOT IMAGES\MASTER LINES\carex-glaucodea.jpg	2010-07-01 14:38:19	C:\January 2011 GLOSS PIVOT DEPLOY TESTS\JAN 04 2011\REAL A-10\A10_files\images\carex-glaucodea.xml	Carex glaucodea		Copyright New York Botanical Garden Press - used with permission	Carex	taxon	Carex glaucodea	Canada	United States		Alabama			Arkansas			Connecticut	Delaware					Illinois	Indiana			Kentucky	Louisiana		Maryland	Massachusetts			Mississippi	Missouri				New Hampshire	New Jersey		New York	North Carolina		Ohio	Oklahoma
F:\AUGUST 2010 PIVOT IMAGES\MASTER LINES\carex-globosa.jpg	#137	F:\AUGUST 2010 PIVOT IMAGES\MASTER LINES\carex-globosa.jpg	2010-07-01 14:35:47	C:\January 2011 GLOSS PIVOT DEPLOY TESTS\JAN 04 2011\REAL A-10\A10_files\images\carex-globosa.xml	Carex globosa		Copyright New York Botanical Garden Press - used with permission	Carex	taxon	Carex globosa		United States						California
F:\AUGUST 2010 PIVOT IMAGES\MASTER LINES\carex-gmelini.jpg	#138	F:\AUGUST 2010 PIVOT IMAGES\MASTER LINES\carex-gmelini.jpg	2010-07-01 14:41:21	C:\January 2011 GLOSS PIVOT DEPLOY TESTS\JAN 04 2011\REAL A-10\A10_files\images\carex-gmelini.xml	Carex gmelinii		Copyright New York Botanical Garden Press - used with permission	Carex	taxon	Carex gmelinii	Canada	United States			Alaska
F:\AUGUST 2010 PIVOT IMAGES\MASTER LINES\carex-gracilescens.jpg	#139	F:\AUGUST 2010 PIVOT IMAGES\MASTER LINES\carex-gracilescens.jpg	2010-07-01 14:37:57	C:\January 2011 GLOSS PIVOT DEPLOY TESTS\JAN 04 2011\REAL A-10\A10_files\images\carex-gracilescens.xml	Carex gracilescens		Copyright New York Botanical Garden Press - used with permission	Carex	taxon	Carex gracilescens	Canada	United States		Alabama			Arkansas			Connecticut	Delaware	Florida	Georgia			Illinois	Indiana	Iowa		Kentucky			Maryland	Massachusetts	Michigan		Mississippi	Missouri				New Hampshire	New Jersey		New York	North Carolina		Ohio	Oklahoma
F:\AUGUST 2010 PIVOT IMAGES\MASTER LINES\carex-gracilior.jpg	#140	F:\AUGUST 2010 PIVOT IMAGES\MASTER LINES\carex-gracilior.jpg	2010-07-01 14:33:38	C:\January 2011 GLOSS PIVOT DEPLOY TESTS\JAN 04 2011\REAL A-10\A10_files\images\carex-gracilior.xml	Carex gracilior		Copyright New York Botanical Garden Press - used with permission	Carex	taxon	Carex gracilior		United States						California
F:\AUGUST 2010 PIVOT IMAGES\MASTER LINES\carex-gracillima.jpg	#141	F:\AUGUST 2010 PIVOT IMAGES\MASTER LINES\carex-gracillima.jpg	2010-07-01 14:38:36	C:\January 2011 GLOSS PIVOT DEPLOY TESTS\JAN 04 2011\REAL A-10\A10_files\images\carex-gracillima.xml	Carex gracillima		Copyright New York Botanical Garden Press - used with permission	Carex	taxon	Carex gracillima	Canada	United States		Alabama			Arkansas			Connecticut	Delaware		Georgia			Illinois	Indiana	Iowa		Kentucky		Maine	Maryland	Massachusetts	Michigan	Minnesota		Missouri				New Hampshire	New Jersey		New York	North Carolina	North Dakota	Ohio
F:\AUGUST 2010 PIVOT IMAGES\MASTER LINES\carex-granularis.jpg	#142	F:\AUGUST 2010 PIVOT IMAGES\MASTER LINES\carex-granularis.jpg	2010-07-01 14:38:02	C:\January 2011 GLOSS PIVOT DEPLOY TESTS\JAN 04 2011\REAL A-10\A10_files\images\carex-granularis.xml	Carex granularis		Copyright New York Botanical Garden Press - used with permission	Carex	taxon	Carex granularis	Canada	United States		Alabama			Arkansas			Connecticut	Delaware		Georgia			Illinois	Indiana	Iowa	Kansas	Kentucky	Louisiana	Maine	Maryland	Massachusetts	Michigan	Minnesota	Mississippi	Missouri		Nebraska		New Hampshire	New Jersey		New York	North Carolina	North Dakota	Ohio	Oklahoma
F:\AUGUST 2010 PIVOT IMAGES\MASTER LINES\carex-grayii.jpg	#143	F:\AUGUST 2010 PIVOT IMAGES\MASTER LINES\carex-grayii.jpg	2010-07-01 14:44:22	C:\January 2011 GLOSS PIVOT DEPLOY TESTS\JAN 04 2011\REAL A-10\A10_files\images\carex-grayii.xml	Carex grayi		Copyright New York Botanical Garden Press - used with permission	Carex	taxon	Carex grayi	Canada	United States		Alabama			Arkansas			Connecticut	Delaware	Florida	Georgia			Illinois	Indiana	Iowa	Kansas	Kentucky			Maryland	Massachusetts	Michigan	Minnesota	Mississippi	Missouri					New Jersey		New York	North Carolina		Ohio	Oklahoma
F:\AUGUST 2010 PIVOT IMAGES\MASTER LINES\carex-grisea.jpg	#144	F:\AUGUST 2010 PIVOT IMAGES\MASTER LINES\carex-grisea.jpg	2010-07-01 14:38:16	C:\January 2011 GLOSS PIVOT DEPLOY TESTS\JAN 04 2011\REAL A-10\A10_files\images\carex-grisea.xml	Carex grisea		Copyright New York Botanical Garden Press - used with permission	Carex	taxon	Carex grisea	Canada	United States		Alabama			Arkansas			Connecticut	Delaware	Florida	Georgia			Illinois	Indiana	Iowa	Kansas	Kentucky	Louisiana	Maine	Maryland	Massachusetts	Michigan	Minnesota	Mississippi	Missouri		Nebraska		New Hampshire	New Jersey		New York	North Carolina		Ohio	Oklahoma
F:\AUGUST 2010 PIVOT IMAGES\MASTER LINES\carex-gynandra.jpg	#145	F:\AUGUST 2010 PIVOT IMAGES\MASTER LINES\carex-gynandra.jpg	2010-07-01 14:42:50	C:\January 2011 GLOSS PIVOT DEPLOY TESTS\JAN 04 2011\REAL A-10\A10_files\images\carex-gynandra.xml	Carex gynandra		Copyright New York Botanical Garden Press - used with permission	Carex	taxon	Carex gynandra	Canada	United States								Connecticut			Georgia							Kentucky		Maine	Maryland	Massachusetts	Michigan	Minnesota						New Hampshire	New Jersey		New York	North Carolina		Ohio
F:\AUGUST 2010 PIVOT IMAGES\MASTER LINES\carex-gynocrates.jpg	#146	F:\AUGUST 2010 PIVOT IMAGES\MASTER LINES\carex-gynocrates.jpg	2010-07-01 14:32:27	C:\January 2011 GLOSS PIVOT DEPLOY TESTS\JAN 04 2011\REAL A-10\A10_files\images\carex-gynocrates.xml	Carex gynocrates		Copyright New York Botanical Garden Press - used with permission	Carex	taxon	Carex gynocrates	Canada	United States			Alaska				Colorado						Idaho							Maine			Michigan	Minnesota			Montana		Nevada		New Jersey		New York		North Dakota
F:\AUGUST 2010 PIVOT IMAGES\MASTER LINES\carex-gynodynama.jpg	#147	F:\AUGUST 2010 PIVOT IMAGES\MASTER LINES\carex-gynodynama.jpg	2010-07-01 14:38:51	C:\January 2011 GLOSS PIVOT DEPLOY TESTS\JAN 04 2011\REAL A-10\A10_files\images\carex-gynodynama.xml	Carex gynodynama		Copyright New York Botanical Garden Press - used with permission	Carex	taxon	Carex gynodynama		United States						California
F:\AUGUST 2010 PIVOT IMAGES\MASTER LINES\carex-halliana.jpg	#148	F:\AUGUST 2010 PIVOT IMAGES\MASTER LINES\carex-halliana.jpg	2010-07-01 14:40:13	C:\January 2011 GLOSS PIVOT DEPLOY TESTS\JAN 04 2011\REAL A-10\A10_files\images\carex-halliana.xml	Carex halliana		Copyright New York Botanical Garden Press - used with permission	Carex	taxon	Carex halliana		United States						California
F:\AUGUST 2010 PIVOT IMAGES\MASTER LINES\carex-hallii.jpg	#149	F:\AUGUST 2010 PIVOT IMAGES\MASTER LINES\carex-hallii.jpg	2010-07-01 14:41:03	C:\January 2011 GLOSS PIVOT DEPLOY TESTS\JAN 04 2011\REAL A-10\A10_files\images\carex-hallii.xml	Carex hallii		Copyright New York Botanical Garden Press - used with permission	Carex	taxon	Carex hallii	Canada	United States							Colorado																	Minnesota				Nebraska							North Dakota
F:\AUGUST 2010 PIVOT IMAGES\MASTER LINES\carex-harfordii.jpg	#150	F:\AUGUST 2010 PIVOT IMAGES\MASTER LINES\carex-harfordii.jpg	2010-07-01 14:33:21	C:\January 2011 GLOSS PIVOT DEPLOY TESTS\JAN 04 2011\REAL A-10\A10_files\images\carex-harfordii.xml	Carex harfordii		Copyright New York Botanical Garden Press - used with permission	Carex	taxon	Carex harfordii		United States						California
F:\AUGUST 2010 PIVOT IMAGES\MASTER LINES\carex-hassei.jpg	#151	F:\AUGUST 2010 PIVOT IMAGES\MASTER LINES\carex-hassei.jpg	2010-07-01 14:37:04	C:\January 2011 GLOSS PIVOT DEPLOY TESTS\JAN 04 2011\REAL A-10\A10_files\images\carex-hassei.xml	Carex hassei		Copyright New York Botanical Garden Press - used with permission	Carex	taxon	Carex hassei	Canada	United States	Mexico			Arizona		California																							Nevada
F:\AUGUST 2010 PIVOT IMAGES\MASTER LINES\carex-haydenii.jpg	#152	F:\AUGUST 2010 PIVOT IMAGES\MASTER LINES\carex-haydenii.jpg	2010-07-01 14:42:31	C:\January 2011 GLOSS PIVOT DEPLOY TESTS\JAN 04 2011\REAL A-10\A10_files\images\carex-haydenii.xml	Carex haydenii		Copyright New York Botanical Garden Press - used with permission	Carex	taxon	Carex haydenii	Canada	United States								Connecticut	Delaware					Illinois	Indiana	Iowa				Maine		Massachusetts	Michigan	Minnesota		Missouri		Nebraska		New Hampshire	New Jersey		New York		North Dakota	Ohio
F:\AUGUST 2010 PIVOT IMAGES\MASTER LINES\carex-heleonastes.jpg	#153	F:\AUGUST 2010 PIVOT IMAGES\MASTER LINES\carex-heleonastes.jpg	2010-07-01 14:45:08	C:\January 2011 GLOSS PIVOT DEPLOY TESTS\JAN 04 2011\REAL A-10\A10_files\images\carex-heleonastes.xml	Carex heleonastes		Copyright New York Botanical Garden Press - used with permission	Carex	taxon	Carex heleonastes	Canada	United States			Alaska																				Michigan
F:\AUGUST 2010 PIVOT IMAGES\MASTER LINES\carex-helleri.jpg	#154	F:\AUGUST 2010 PIVOT IMAGES\MASTER LINES\carex-helleri.jpg	2010-07-01 14:41:27	C:\January 2011 GLOSS PIVOT DEPLOY TESTS\JAN 04 2011\REAL A-10\A10_files\images\carex-helleri.xml	Carex helleri		Copyright New York Botanical Garden Press - used with permission	Carex	taxon	Carex helleri		United States						California																							Nevada
F:\AUGUST 2010 PIVOT IMAGES\MASTER LINES\carex-hendersonii.jpg	#155	F:\AUGUST 2010 PIVOT IMAGES\MASTER LINES\carex-hendersonii.jpg	2010-07-01 14:37:42	C:\January 2011 GLOSS PIVOT DEPLOY TESTS\JAN 04 2011\REAL A-10\A10_files\images\carex-hendersonii.xml	Carex hendersonii		Copyright New York Botanical Garden Press - used with permission	Carex	taxon	Carex hendersonii	Canada	United States						California							Idaho
F:\AUGUST 2010 PIVOT IMAGES\MASTER LINES\carex-heteroneura (2).jpg	#156	F:\AUGUST 2010 PIVOT IMAGES\MASTER LINES\carex-heteroneura (2).jpg	2010-07-01 14:41:31	C:\January 2011 GLOSS PIVOT DEPLOY TESTS\JAN 04 2011\REAL A-10\A10_files\images\carex-heteroneura(2).xml	Carex heteroneura		Copyright New York Botanical Garden Press - used with permission	Carex	taxon	Carex heteroneura	Canada	United States						California																							Nevada
F:\AUGUST 2010 PIVOT IMAGES\MASTER LINES\carex-hirsutella.jpg	#157	F:\AUGUST 2010 PIVOT IMAGES\MASTER LINES\carex-hirsutella.jpg	2010-07-01 14:40:05	C:\January 2011 GLOSS PIVOT DEPLOY TESTS\JAN 04 2011\REAL A-10\A10_files\images\carex-hirsutella.xml	Carex hirsutella		Copyright New York Botanical Garden Press - used with permission	Carex	taxon	Carex hirsutella	Canada	United States		Alabama			Arkansas			Connecticut	Delaware		Georgia			Illinois	Indiana	Iowa	Kansas	Kentucky	Louisiana	Maine	Maryland	Massachusetts	Michigan	Minnesota	Mississippi	Missouri				New Hampshire	New Jersey		New York	North Carolina		Ohio	Oklahoma
F:\AUGUST 2010 PIVOT IMAGES\MASTER LINES\carex-hirta.jpg	#158	F:\AUGUST 2010 PIVOT IMAGES\MASTER LINES\carex-hirta.jpg	2010-07-01 14:40:20	C:\January 2011 GLOSS PIVOT DEPLOY TESTS\JAN 04 2011\REAL A-10\A10_files\images\carex-hirta.xml	Carex hirta		Copyright New York Botanical Garden Press - used with permission	Carex	taxon	Carex hirta	Canada	United States								Connecticut												Maine	Maryland	Massachusetts	Michigan								New Jersey		New York
F:\AUGUST 2010 PIVOT IMAGES\MASTER LINES\carex-hirtifolia.jpg	#159	F:\AUGUST 2010 PIVOT IMAGES\MASTER LINES\carex-hirtifolia.jpg	2010-07-01 14:36:27	C:\January 2011 GLOSS PIVOT DEPLOY TESTS\JAN 04 2011\REAL A-10\A10_files\images\carex-hirtifolia.xml	Carex hirtifolia		Copyright New York Botanical Garden Press - used with permission	Carex	taxon	Carex hirtifolia	Canada	United States					Arkansas			Connecticut	Delaware					Illinois	Indiana	Iowa				Maine	Maryland	Massachusetts	Michigan	Minnesota		Missouri				New Hampshire	New Jersey		New York			Ohio
F:\AUGUST 2010 PIVOT IMAGES\MASTER LINES\carex-hirtissima.jpg	#160	F:\AUGUST 2010 PIVOT IMAGES\MASTER LINES\carex-hirtissima.jpg	2010-07-01 14:45:32	C:\January 2011 GLOSS PIVOT DEPLOY TESTS\JAN 04 2011\REAL A-10\A10_files\images\carex-hirtissima.xml	Carex hirtissima		Copyright New York Botanical Garden Press - used with permission	Carex	taxon	Carex hirtissima		United States						California
F:\AUGUST 2010 PIVOT IMAGES\MASTER LINES\carex-hitchcockiana.jpg	#161	F:\AUGUST 2010 PIVOT IMAGES\MASTER LINES\carex-hitchcockiana.jpg	2010-07-01 14:38:09	C:\January 2011 GLOSS PIVOT DEPLOY TESTS\JAN 04 2011\REAL A-10\A10_files\images\carex-hitchcockiana.xml	Carex hitchcockiana		Copyright New York Botanical Garden Press - used with permission	Carex	taxon	Carex hitchcockiana	Canada	United States		Alabama			Arkansas			Connecticut						Illinois	Indiana	Iowa	Kansas	Kentucky			Maryland	Massachusetts	Michigan	Minnesota		Missouri					New Jersey		New York			Ohio	Oklahoma
F:\AUGUST 2010 PIVOT IMAGES\MASTER LINES\carex-holostoma.jpg	#162	F:\AUGUST 2010 PIVOT IMAGES\MASTER LINES\carex-holostoma.jpg	2010-07-01 14:41:08	C:\January 2011 GLOSS PIVOT DEPLOY TESTS\JAN 04 2011\REAL A-10\A10_files\images\carex-holostoma.xml	Carex holostoma		Copyright New York Botanical Garden Press - used with permission	Carex	taxon	Carex holostoma	Canada	United States			Alaska
F:\AUGUST 2010 PIVOT IMAGES\MASTER LINES\carex-hoodii.jpg	#163	F:\AUGUST 2010 PIVOT IMAGES\MASTER LINES\carex-hoodii.jpg	2010-07-01 14:30:43	C:\January 2011 GLOSS PIVOT DEPLOY TESTS\JAN 04 2011\REAL A-10\A10_files\images\carex-hoodii.xml	Carex hoodii		Copyright New York Botanical Garden Press - used with permission	Carex	taxon	Carex hoodii	Canada	United States			Alaska			California	Colorado						Idaho														Montana		Nevada
F:\AUGUST 2010 PIVOT IMAGES\MASTER LINES\carex-hookerana.jpg	#164	F:\AUGUST 2010 PIVOT IMAGES\MASTER LINES\carex-hookerana.jpg	2010-07-01 14:30:56	C:\January 2011 GLOSS PIVOT DEPLOY TESTS\JAN 04 2011\REAL A-10\A10_files\images\carex-hookerana.xml	Carex hookeriana		Copyright New York Botanical Garden Press - used with permission	Carex	taxon	Carex hookeriana	Canada	United States																																			North Dakota
F:\AUGUST 2010 PIVOT IMAGES\MASTER LINES\carex-hormathodes.jpg	#165	F:\AUGUST 2010 PIVOT IMAGES\MASTER LINES\carex-hormathodes.jpg	2010-07-01 14:45:16	C:\January 2011 GLOSS PIVOT DEPLOY TESTS\JAN 04 2011\REAL A-10\A10_files\images\carex-hormathodes.xml	Carex hormathodes		Copyright New York Botanical Garden Press - used with permission	Carex	taxon	Carex hormathodes	Canada	United States								Connecticut	Delaware											Maine	Maryland	Massachusetts								New Hampshire	New Jersey		New York	North Carolina
F:\AUGUST 2010 PIVOT IMAGES\MASTER LINES\carex-houghtoniana.jpg	#166	F:\AUGUST 2010 PIVOT IMAGES\MASTER LINES\carex-houghtoniana.jpg	2010-07-01 14:40:15	C:\January 2011 GLOSS PIVOT DEPLOY TESTS\JAN 04 2011\REAL A-10\A10_files\images\carex-houghtoniana.xml	Carex houghtoniana		Copyright New York Botanical Garden Press - used with permission	Carex	taxon	Carex houghtoniana	Canada	United States														Illinois						Maine			Michigan	Minnesota						New Hampshire			New York
F:\AUGUST 2010 PIVOT IMAGES\MASTER LINES\carex-hyalina.jpg	#167	F:\AUGUST 2010 PIVOT IMAGES\MASTER LINES\carex-hyalina.jpg	2010-07-01 14:34:28	C:\January 2011 GLOSS PIVOT DEPLOY TESTS\JAN 04 2011\REAL A-10\A10_files\images\carex-hyalina.xml	Carex hyalina		Copyright New York Botanical Garden Press - used with permission	Carex	taxon	Carex hyalina		United States					Arkansas														Louisiana						Mississippi												Oklahoma
F:\AUGUST 2010 PIVOT IMAGES\MASTER LINES\carex-hyalinolepis.jpg	#168	F:\AUGUST 2010 PIVOT IMAGES\MASTER LINES\carex-hyalinolepis.jpg	2010-07-01 14:43:34	C:\January 2011 GLOSS PIVOT DEPLOY TESTS\JAN 04 2011\REAL A-10\A10_files\images\carex-hyalinolepis.xml	Carex hyalinolepis		Copyright New York Botanical Garden Press - used with permission	Carex	taxon	Carex hyalinolepis	Canada	United States		Alabama			Arkansas					Florida	Georgia			Illinois	Indiana	Iowa	Kansas	Kentucky	Louisiana		Maryland		Michigan		Mississippi	Missouri		Nebraska						North Carolina		Ohio	Oklahoma
F:\AUGUST 2010 PIVOT IMAGES\MASTER LINES\carex-hystericina.jpg	#169	F:\AUGUST 2010 PIVOT IMAGES\MASTER LINES\carex-hystericina.jpg	2010-07-01 14:43:22	C:\January 2011 GLOSS PIVOT DEPLOY TESTS\JAN 04 2011\REAL A-10\A10_files\images\carex-hystericina.xml	Carex hystericina		Copyright New York Botanical Garden Press - used with permission	Carex	taxon	Carex hystericina	Canada	United States				Arizona	Arkansas	California		Connecticut			Georgia		Idaho	Illinois	Indiana	Iowa	Kansas	Kentucky		Maine	Maryland	Massachusetts	Michigan	Minnesota		Missouri	Montana	Nebraska		New Hampshire	New Jersey	New Mexico	New York		North Dakota	Ohio
F:\AUGUST 2010 PIVOT IMAGES\MASTER LINES\carex-idahoa.jpg	#170	F:\AUGUST 2010 PIVOT IMAGES\MASTER LINES\carex-idahoa.jpg	2010-07-01 14:41:01	C:\January 2011 GLOSS PIVOT DEPLOY TESTS\JAN 04 2011\REAL A-10\A10_files\images\carex-idahoa.xml	Carex idahoa		Copyright New York Botanical Garden Press - used with permission	Carex	taxon	Carex idahoa		United States						California							Idaho														Montana
F:\AUGUST 2010 PIVOT IMAGES\MASTER LINES\carex-illota.jpg	#171	F:\AUGUST 2010 PIVOT IMAGES\MASTER LINES\carex-illota.jpg	2010-07-01 14:33:28	C:\January 2011 GLOSS PIVOT DEPLOY TESTS\JAN 04 2011\REAL A-10\A10_files\images\carex-illota.xml	Carex illota		Copyright New York Botanical Garden Press - used with permission	Carex	taxon	Carex illota	Canada	United States						California	Colorado						Idaho														Montana		Nevada
F:\AUGUST 2010 PIVOT IMAGES\MASTER LINES\carex-incurviformis.jpg	#172	F:\AUGUST 2010 PIVOT IMAGES\MASTER LINES\carex-incurviformis.jpg	2010-07-01 14:30:10	C:\January 2011 GLOSS PIVOT DEPLOY TESTS\JAN 04 2011\REAL A-10\A10_files\images\carex-incurviformis.xml	Carex incurviformis		Copyright New York Botanical Garden Press - used with permission	Carex	taxon	Carex incurviformis	Canada	United States			Alaska			California	Colorado																				Montana
F:\AUGUST 2010 PIVOT IMAGES\MASTER LINES\carex-inops.jpg	#173	F:\AUGUST 2010 PIVOT IMAGES\MASTER LINES\carex-inops.jpg	2010-07-01 14:35:41	C:\January 2011 GLOSS PIVOT DEPLOY TESTS\JAN 04 2011\REAL A-10\A10_files\images\carex-inops.xml	Carex inops		Copyright New York Botanical Garden Press - used with permission	Carex	taxon	Carex inops	Canada	United States						California	Colorado							Illinois	Indiana	Iowa	Kansas						Michigan	Minnesota		Missouri	Montana	Nebraska				New Mexico			North Dakota		Oklahoma
F:\AUGUST 2010 PIVOT IMAGES\MASTER LINES\carex-integra.jpg	#174	F:\AUGUST 2010 PIVOT IMAGES\MASTER LINES\carex-integra.jpg	2010-07-01 14:33:29	C:\January 2011 GLOSS PIVOT DEPLOY TESTS\JAN 04 2011\REAL A-10\A10_files\images\carex-integra.xml	Carex integra		Copyright New York Botanical Garden Press - used with permission	Carex	taxon	Carex integra		United States						California
F:\AUGUST 2010 PIVOT IMAGES\MASTER LINES\carex-interior.jpg	#175	F:\AUGUST 2010 PIVOT IMAGES\MASTER LINES\carex-interior.jpg	2010-07-01 14:32:37	C:\January 2011 GLOSS PIVOT DEPLOY TESTS\JAN 04 2011\REAL A-10\A10_files\images\carex-interior.xml	Carex interior		Copyright New York Botanical Garden Press - used with permission	Carex	taxon	Carex interior	Canada	United States	Mexico			Arizona		California	Colorado	Connecticut	Delaware				Idaho	Illinois	Indiana	Iowa	Kansas			Maine	Maryland	Massachusetts	Michigan	Minnesota		Missouri	Montana	Nebraska	Nevada	New Hampshire	New Jersey	New Mexico	New York		North Dakota	Ohio
F:\AUGUST 2010 PIVOT IMAGES\MASTER LINES\carex-interrupta.jpg	#176	F:\AUGUST 2010 PIVOT IMAGES\MASTER LINES\carex-interrupta.jpg	2010-07-01 14:42:16	C:\January 2011 GLOSS PIVOT DEPLOY TESTS\JAN 04 2011\REAL A-10\A10_files\images\carex-interrupta.xml	Carex interrupta		Copyright New York Botanical Garden Press - used with permission	Carex	taxon	Carex interrupta	Canada	United States
F:\AUGUST 2010 PIVOT IMAGES\MASTER LINES\carex-intumescens.jpg	#177	F:\AUGUST 2010 PIVOT IMAGES\MASTER LINES\carex-intumescens.jpg	2010-07-01 14:44:24	C:\January 2011 GLOSS PIVOT DEPLOY TESTS\JAN 04 2011\REAL A-10\A10_files\images\carex-intumescens.xml	Carex intumescens		Copyright New York Botanical Garden Press - used with permission	Carex	taxon	Carex intumescens	Canada	United States		Alabama			Arkansas			Connecticut	Delaware	Florida	Georgia			Illinois	Indiana	Iowa		Kentucky	Louisiana	Maine	Maryland	Massachusetts	Michigan	Minnesota	Mississippi	Missouri				New Hampshire	New Jersey		New York	North Carolina		Ohio	Oklahoma
F:\AUGUST 2010 PIVOT IMAGES\MASTER LINES\carex-jamesii.jpg	#178	F:\AUGUST 2010 PIVOT IMAGES\MASTER LINES\carex-jamesii.jpg	2010-07-01 14:35:07	C:\January 2011 GLOSS PIVOT DEPLOY TESTS\JAN 04 2011\REAL A-10\A10_files\images\carex-jamesii.xml	Carex jamesii		Copyright New York Botanical Garden Press - used with permission	Carex	taxon	Carex jamesii	Canada	United States	Mexico	Alabama			Arkansas						Georgia			Illinois	Indiana	Iowa	Kansas	Kentucky			Maryland		Michigan	Minnesota	Mississippi	Missouri		Nebraska			New Jersey		New York	North Carolina		Ohio	Oklahoma
F:\AUGUST 2010 PIVOT IMAGES\MASTER LINES\carex-jonesii.jpg	#179	F:\AUGUST 2010 PIVOT IMAGES\MASTER LINES\carex-jonesii.jpg	2010-07-01 14:31:45	C:\January 2011 GLOSS PIVOT DEPLOY TESTS\JAN 04 2011\REAL A-10\A10_files\images\carex-jonesii.xml	Carex jonesii		Copyright New York Botanical Garden Press - used with permission	Carex	taxon	Carex jonesii		United States						California	Colorado						Idaho														Montana		Nevada
F:\AUGUST 2010 PIVOT IMAGES\MASTER LINES\carex-joorii.jpg	#180	F:\AUGUST 2010 PIVOT IMAGES\MASTER LINES\carex-joorii.jpg	2010-07-01 14:40:46	C:\January 2011 GLOSS PIVOT DEPLOY TESTS\JAN 04 2011\REAL A-10\A10_files\images\carex-joorii.xml	Carex joorii		Copyright New York Botanical Garden Press - used with permission	Carex	taxon	Carex joorii		United States		Alabama			Arkansas					Florida	Georgia							Kentucky	Louisiana		Maryland				Mississippi	Missouri								North Carolina
F:\AUGUST 2010 PIVOT IMAGES\MASTER LINES\carex-lacustris.jpg	#181	F:\AUGUST 2010 PIVOT IMAGES\MASTER LINES\carex-lacustris.jpg	2010-07-01 14:43:32	C:\January 2011 GLOSS PIVOT DEPLOY TESTS\JAN 04 2011\REAL A-10\A10_files\images\carex-lacustris.xml	Carex lacustris		Copyright New York Botanical Garden Press - used with permission	Carex	taxon	Carex lacustris	Canada	United States								Connecticut	Delaware				Idaho	Illinois	Indiana	Iowa	Kansas			Maine	Maryland	Massachusetts	Michigan	Minnesota		Missouri		Nebraska		New Hampshire	New Jersey		New York		North Dakota	Ohio
F:\AUGUST 2010 PIVOT IMAGES\MASTER LINES\carex-laeveconica.jpg	#182	F:\AUGUST 2010 PIVOT IMAGES\MASTER LINES\carex-laeveconica.jpg	2010-07-01 14:43:36	C:\January 2011 GLOSS PIVOT DEPLOY TESTS\JAN 04 2011\REAL A-10\A10_files\images\carex-laeveconica.xml	Carex laeviconica		Copyright New York Botanical Garden Press - used with permission	Carex	taxon	Carex laeviconica	Canada	United States													Idaho	Illinois		Iowa	Kansas									Missouri	Montana	Nebraska							North Dakota
F:\AUGUST 2010 PIVOT IMAGES\MASTER LINES\carex-laeviculmis.jpg	#183	F:\AUGUST 2010 PIVOT IMAGES\MASTER LINES\carex-laeviculmis.jpg	2010-07-01 14:32:31	C:\January 2011 GLOSS PIVOT DEPLOY TESTS\JAN 04 2011\REAL A-10\A10_files\images\carex-laeviculmis.xml	Carex laeviculmis		Copyright New York Botanical Garden Press - used with permission	Carex	taxon	Carex laeviculmis	Canada	United States			Alaska			California							Idaho														Montana
F:\AUGUST 2010 PIVOT IMAGES\MASTER LINES\carex-laevivaginata.jpg	#184	F:\AUGUST 2010 PIVOT IMAGES\MASTER LINES\carex-laevivaginata.jpg	2010-07-01 14:31:57	C:\January 2011 GLOSS PIVOT DEPLOY TESTS\JAN 04 2011\REAL A-10\A10_files\images\carex-laevivaginata.xml	Carex laevivaginata		Copyright New York Botanical Garden Press - used with permission	Carex	taxon	Carex laevivaginata	Canada	United States		Alabama			Arkansas			Connecticut	Delaware	Florida	Georgia			Illinois	Indiana	Iowa		Kentucky		Maine	Maryland	Massachusetts	Michigan	Minnesota	Mississippi	Missouri					New Jersey		New York	North Carolina		Ohio	Oklahoma
F:\AUGUST 2010 PIVOT IMAGES\MASTER LINES\carex-lasicoarpa.jpg	#185	F:\AUGUST 2010 PIVOT IMAGES\MASTER LINES\carex-lasicoarpa.jpg	2010-07-01 14:40:18	C:\January 2011 GLOSS PIVOT DEPLOY TESTS\JAN 04 2011\REAL A-10\A10_files\images\carex-lasicoarpa.xml	Carex lasiocarpa		Copyright New York Botanical Garden Press - used with permission	Carex	taxon	Carex lasiocarpa	Canada	United States			Alaska			California		Connecticut					Idaho	Illinois	Indiana	Iowa				Maine		Massachusetts	Michigan	Minnesota			Montana			New Hampshire	New Jersey		New York			Ohio
F:\AUGUST 2010 PIVOT IMAGES\MASTER LINES\carex-laxiculmis.jpg	#186	F:\AUGUST 2010 PIVOT IMAGES\MASTER LINES\carex-laxiculmis.jpg	2010-07-01 14:37:37	C:\January 2011 GLOSS PIVOT DEPLOY TESTS\JAN 04 2011\REAL A-10\A10_files\images\carex-laxiculmis.xml	Carex laxiculmis		Copyright New York Botanical Garden Press - used with permission	Carex	taxon	Carex laxiculmis	Canada	United States		Alabama			Arkansas			Connecticut	Delaware	Florida	Georgia			Illinois	Indiana	Iowa		Kentucky		Maine	Maryland	Massachusetts	Michigan	Minnesota		Missouri				New Hampshire	New Jersey		New York	North Carolina		Ohio	Oklahoma
F:\AUGUST 2010 PIVOT IMAGES\MASTER LINES\carex-laxiflora.jpg	#187	F:\AUGUST 2010 PIVOT IMAGES\MASTER LINES\carex-laxiflora.jpg	2010-07-01 14:37:47	C:\January 2011 GLOSS PIVOT DEPLOY TESTS\JAN 04 2011\REAL A-10\A10_files\images\carex-laxiflora.xml	Carex laxiflora		Copyright New York Botanical Garden Press - used with permission	Carex	taxon	Carex laxiflora	Canada	United States	Mexico	Alabama			Arkansas			Connecticut		Florida	Georgia			Illinois	Indiana			Kentucky	Louisiana	Maine	Maryland	Massachusetts	Michigan	Minnesota	Mississippi					New Hampshire	New Jersey		New York	North Carolina		Ohio	Oklahoma
F:\AUGUST 2010 PIVOT IMAGES\MASTER LINES\carex-leavenworthii.jpg	#188	F:\AUGUST 2010 PIVOT IMAGES\MASTER LINES\carex-leavenworthii.jpg	2010-07-01 14:30:46	C:\January 2011 GLOSS PIVOT DEPLOY TESTS\JAN 04 2011\REAL A-10\A10_files\images\carex-leavenworthii.xml	Carex leavenworthii		Copyright New York Botanical Garden Press - used with permission	Carex	taxon	Carex leavenworthii	Canada	United States		Alabama			Arkansas	California		Connecticut	Delaware	Florida	Georgia				Indiana	Iowa	Kansas	Kentucky	Louisiana		Maryland		Michigan		Mississippi	Missouri		Nebraska			New Jersey		New York	North Carolina		Ohio	Oklahoma
F:\AUGUST 2010 PIVOT IMAGES\MASTER LINES\carex-lemmoni.jpg	#189	F:\AUGUST 2010 PIVOT IMAGES\MASTER LINES\carex-lemmoni.jpg	2010-07-01 14:39:45	C:\January 2011 GLOSS PIVOT DEPLOY TESTS\JAN 04 2011\REAL A-10\A10_files\images\carex-lemmoni.xml	Carex lemmonii		Copyright New York Botanical Garden Press - used with permission	Carex	taxon	Carex lemmonii		United States						California
F:\AUGUST 2010 PIVOT IMAGES\MASTER LINES\carex-lenticularis.jpg	#190	F:\AUGUST 2010 PIVOT IMAGES\MASTER LINES\carex-lenticularis.jpg	2010-07-01 14:42:04	C:\January 2011 GLOSS PIVOT DEPLOY TESTS\JAN 04 2011\REAL A-10\A10_files\images\carex-lenticularis.xml	Carex lenticularis		Copyright New York Botanical Garden Press - used with permission	Carex	taxon	Carex lenticularis	Canada	United States			Alaska	Arizona		California	Colorado						Idaho							Maine		Massachusetts	Michigan	Minnesota			Montana		Nevada	New Hampshire		New Mexico	New York
F:\AUGUST 2010 PIVOT IMAGES\MASTER LINES\carex-leporinella.jpg	#191	F:\AUGUST 2010 PIVOT IMAGES\MASTER LINES\carex-leporinella.jpg	2010-07-01 14:33:52	C:\January 2011 GLOSS PIVOT DEPLOY TESTS\JAN 04 2011\REAL A-10\A10_files\images\carex-leporinella.xml	Carex leporinella		Copyright New York Botanical Garden Press - used with permission	Carex	taxon	Carex leporinella	Canada	United States						California							Idaho														Montana		Nevada
F:\AUGUST 2010 PIVOT IMAGES\MASTER LINES\carex-leptalea.jpg	#192	F:\AUGUST 2010 PIVOT IMAGES\MASTER LINES\carex-leptalea.jpg	2010-07-01 14:45:21	C:\January 2011 GLOSS PIVOT DEPLOY TESTS\JAN 04 2011\REAL A-10\A10_files\images\carex-leptalea.xml	Carex leptalea		Copyright New York Botanical Garden Press - used with permission	Carex	taxon	Carex leptalea	Canada	United States	Mexico	Alabama	Alaska		Arkansas	California	Colorado	Connecticut	Delaware	Florida	Georgia		Idaho	Illinois	Indiana	Iowa		Kentucky	Louisiana	Maine	Maryland	Massachusetts	Michigan	Minnesota	Mississippi	Missouri	Montana			New Hampshire	New Jersey	New Mexico	New York	North Carolina	North Dakota	Ohio	Oklahoma
F:\AUGUST 2010 PIVOT IMAGES\MASTER LINES\carex-leptonervia.jpg	#193	F:\AUGUST 2010 PIVOT IMAGES\MASTER LINES\carex-leptonervia.jpg	2010-07-01 14:37:50	C:\January 2011 GLOSS PIVOT DEPLOY TESTS\JAN 04 2011\REAL A-10\A10_files\images\carex-leptonervia.xml	Carex leptonervia		Copyright New York Botanical Garden Press - used with permission	Carex	taxon	Carex leptonervia	Canada	United States								Connecticut							Indiana			Kentucky		Maine	Maryland	Massachusetts	Michigan	Minnesota						New Hampshire	New Jersey		New York	North Carolina		Ohio
F:\AUGUST 2010 PIVOT IMAGES\MASTER LINES\carex-leptopoda.jpg	#194	F:\AUGUST 2010 PIVOT IMAGES\MASTER LINES\carex-leptopoda.jpg	2010-07-01 14:33:04	C:\January 2011 GLOSS PIVOT DEPLOY TESTS\JAN 04 2011\REAL A-10\A10_files\images\carex-leptopoda.xml	Carex leptopoda		Copyright New York Botanical Garden Press - used with permission	Carex	taxon	Carex leptopoda	Canada	United States						California							Idaho														Montana
F:\AUGUST 2010 PIVOT IMAGES\MASTER LINES\carex-limosa.jpg	#195	F:\AUGUST 2010 PIVOT IMAGES\MASTER LINES\carex-limosa.jpg	2010-07-01 14:40:56	C:\January 2011 GLOSS PIVOT DEPLOY TESTS\JAN 04 2011\REAL A-10\A10_files\images\carex-limosa.xml	Carex limosa		Copyright New York Botanical Garden Press - used with permission	Carex	taxon	Carex limosa	Canada	United States			Alaska			California	Colorado	Connecticut	Delaware				Idaho	Illinois	Indiana	Iowa				Maine		Massachusetts	Michigan	Minnesota			Montana	Nebraska	Nevada	New Hampshire	New Jersey	New Mexico	New York		North Dakota	Ohio
F:\AUGUST 2010 PIVOT IMAGES\MASTER LINES\carex-livida.jpg	#196	F:\AUGUST 2010 PIVOT IMAGES\MASTER LINES\carex-livida.jpg	2010-07-01 14:37:08	C:\January 2011 GLOSS PIVOT DEPLOY TESTS\JAN 04 2011\REAL A-10\A10_files\images\carex-livida.xml	Carex livida		Copyright New York Botanical Garden Press - used with permission	Carex	taxon	Carex livida	Canada	United States			Alaska			California									Indiana					Maine		Massachusetts	Michigan	Minnesota			Montana			New Hampshire	New Jersey		New York
F:\AUGUST 2010 PIVOT IMAGES\MASTER LINES\carex-loliacea.jpg	#197	F:\AUGUST 2010 PIVOT IMAGES\MASTER LINES\carex-loliacea.jpg	2010-07-01 14:32:09	C:\January 2011 GLOSS PIVOT DEPLOY TESTS\JAN 04 2011\REAL A-10\A10_files\images\carex-loliacea.xml	Carex loliacea		Copyright New York Botanical Garden Press - used with permission	Carex	taxon	Carex loliacea	Canada	United States			Alaska
F:\AUGUST 2010 PIVOT IMAGES\MASTER LINES\carex-lonchocarpa.jpg	#198	F:\AUGUST 2010 PIVOT IMAGES\MASTER LINES\carex-lonchocarpa.jpg	2010-07-01 14:43:19	C:\January 2011 GLOSS PIVOT DEPLOY TESTS\JAN 04 2011\REAL A-10\A10_files\images\carex-lonchocarpa.xml	Carex lonchocarpa		Copyright New York Botanical Garden Press - used with permission	Carex	taxon	Carex lonchocarpa		United States			Alaska						Delaware	Florida	Georgia								Louisiana		Maryland				Mississippi									North Carolina
F:\AUGUST 2010 PIVOT IMAGES\MASTER LINES\carex-longii.jpg	#199	F:\AUGUST 2010 PIVOT IMAGES\MASTER LINES\carex-longii.jpg	2010-07-01 14:45:18	C:\January 2011 GLOSS PIVOT DEPLOY TESTS\JAN 04 2011\REAL A-10\A10_files\images\carex-longii.xml	Carex longii		Copyright New York Botanical Garden Press - used with permission	Carex	taxon	Carex longii	Canada	United States	Mexico	Alabama			Arkansas				Delaware	Florida	Georgia	Hawaii		Illinois	Indiana			Kentucky	Louisiana		Maryland	Massachusetts	Michigan		Mississippi						New Jersey		New York	North Carolina		Ohio	Oklahoma
F:\AUGUST 2010 PIVOT IMAGES\MASTER LINES\carex-louisianica.jpg	#200	F:\AUGUST 2010 PIVOT IMAGES\MASTER LINES\carex-louisianica.jpg	2010-07-01 14:44:26	C:\January 2011 GLOSS PIVOT DEPLOY TESTS\JAN 04 2011\REAL A-10\A10_files\images\carex-louisianica.xml	Carex louisianica		Copyright New York Botanical Garden Press - used with permission	Carex	taxon	Carex louisianica		United States		Alabama			Arkansas				Delaware	Florida	Georgia			Illinois	Indiana			Kentucky	Louisiana		Maryland				Mississippi		Montana				New Jersey					Ohio	Oklahoma
F:\AUGUST 2010 PIVOT IMAGES\MASTER LINES\carex-lucorum.jpg	#201	F:\AUGUST 2010 PIVOT IMAGES\MASTER LINES\carex-lucorum.jpg	2010-07-01 14:35:46	C:\January 2011 GLOSS PIVOT DEPLOY TESTS\JAN 04 2011\REAL A-10\A10_files\images\carex-lucorum.xml	Carex lucorum		Copyright New York Botanical Garden Press - used with permission	Carex	taxon	Carex lucorum	Canada	United States								Connecticut			Georgia			Illinois				Kentucky		Maine	Maryland	Massachusetts	Michigan	Minnesota						New Hampshire	New Jersey		New York	North Carolina		Ohio
F:\AUGUST 2010 PIVOT IMAGES\MASTER LINES\carex-lupuliformis.jpg	#202	F:\AUGUST 2010 PIVOT IMAGES\MASTER LINES\carex-lupuliformis.jpg	2010-07-01 14:44:29	C:\January 2011 GLOSS PIVOT DEPLOY TESTS\JAN 04 2011\REAL A-10\A10_files\images\carex-lupuliformis.xml	Carex lupuliformis		Copyright New York Botanical Garden Press - used with permission	Carex	taxon	Carex lupuliformis	Canada	United States					Arkansas			Connecticut	Delaware	Florida	Georgia			Illinois	Indiana	Iowa		Kentucky	Louisiana	Maine	Maryland		Michigan	Minnesota		Missouri					New Jersey		New York	North Carolina		Ohio
F:\AUGUST 2010 PIVOT IMAGES\MASTER LINES\carex-lupulina.jpg	#203	F:\AUGUST 2010 PIVOT IMAGES\MASTER LINES\carex-lupulina.jpg	2010-07-01 14:46:08	C:\January 2011 GLOSS PIVOT DEPLOY TESTS\JAN 04 2011\REAL A-10\A10_files\images\carex-lupulina.xml	Carex lupulina		Copyright New York Botanical Garden Press - used with permission	Carex	taxon	Carex lupulina	Canada	United States		Alabama			Arkansas			Connecticut		Florida	Georgia			Illinois	Indiana	Iowa	Kansas	Kentucky	Louisiana	Maine	Maryland	Massachusetts	Michigan	Minnesota	Mississippi	Missouri		Nebraska		New Hampshire	New Jersey		New York	North Carolina		Ohio	Oklahoma
F:\AUGUST 2010 PIVOT IMAGES\MASTER LINES\carex-lurida.jpg	#204	F:\AUGUST 2010 PIVOT IMAGES\MASTER LINES\carex-lurida.jpg	2010-07-01 14:44:19	C:\January 2011 GLOSS PIVOT DEPLOY TESTS\JAN 04 2011\REAL A-10\A10_files\images\carex-lurida.xml	Carex lurida		Copyright New York Botanical Garden Press - used with permission	Carex	taxon	Carex lurida	Canada	United States	Mexico	Alabama			Arkansas			Connecticut	Delaware	Florida	Georgia			Illinois	Indiana	Iowa		Kentucky	Louisiana	Maine	Maryland	Massachusetts	Michigan	Minnesota	Mississippi	Missouri				New Hampshire	New Jersey		New York	North Carolina		Ohio	Oklahoma
F:\AUGUST 2010 PIVOT IMAGES\MASTER LINES\carex-luzulina.jpg	#205	F:\AUGUST 2010 PIVOT IMAGES\MASTER LINES\carex-luzulina.jpg	2010-07-01 14:39:48	C:\January 2011 GLOSS PIVOT DEPLOY TESTS\JAN 04 2011\REAL A-10\A10_files\images\carex-luzulina.xml	Carex luzulina		Copyright New York Botanical Garden Press - used with permission	Carex	taxon	Carex luzulina	Canada	United States						California							Idaho														Montana		Nevada
F:\AUGUST 2010 PIVOT IMAGES\MASTER LINES\carex-lyngbyei.jpg	#206	F:\AUGUST 2010 PIVOT IMAGES\MASTER LINES\carex-lyngbyei.jpg	2010-07-01 14:42:55	C:\January 2011 GLOSS PIVOT DEPLOY TESTS\JAN 04 2011\REAL A-10\A10_files\images\carex-lyngbyei.xml	Carex lyngbyei		Copyright New York Botanical Garden Press - used with permission	Carex	taxon	Carex lyngbyei	Canada	United States			Alaska			California
F:\AUGUST 2010 PIVOT IMAGES\MASTER LINES\carex-macloviana.jpg	#207	F:\AUGUST 2010 PIVOT IMAGES\MASTER LINES\carex-macloviana.jpg	2010-07-01 14:33:16	C:\January 2011 GLOSS PIVOT DEPLOY TESTS\JAN 04 2011\REAL A-10\A10_files\images\carex-macloviana.xml	Carex macloviana		Copyright New York Botanical Garden Press - used with permission	Carex	taxon	Carex macloviana	Canada	United States	Mexico		Alaska				Colorado													Maine							Montana
F:\AUGUST 2010 PIVOT IMAGES\MASTER LINES\carex-macrocephala.jpg	#208	F:\AUGUST 2010 PIVOT IMAGES\MASTER LINES\carex-macrocephala.jpg	2010-07-01 14:32:02	C:\January 2011 GLOSS PIVOT DEPLOY TESTS\JAN 04 2011\REAL A-10\A10_files\images\carex-macrocephala.xml	Carex macrocephala		Copyright New York Botanical Garden Press - used with permission	Carex	taxon	Carex macrocephala	Canada	United States			Alaska
F:\AUGUST 2010 PIVOT IMAGES\MASTER LINES\carex-macrochaeta.jpg	#209	F:\AUGUST 2010 PIVOT IMAGES\MASTER LINES\carex-macrochaeta.jpg	2010-07-01 14:40:59	C:\January 2011 GLOSS PIVOT DEPLOY TESTS\JAN 04 2011\REAL A-10\A10_files\images\carex-macrochaeta.xml	Carex macrochaeta		Copyright New York Botanical Garden Press - used with permission	Carex	taxon	Carex macrochaeta	Canada	United States			Alaska
F:\AUGUST 2010 PIVOT IMAGES\MASTER LINES\carex-marina.jpg	#210	F:\AUGUST 2010 PIVOT IMAGES\MASTER LINES\carex-marina.jpg	2010-07-01 14:32:12	C:\January 2011 GLOSS PIVOT DEPLOY TESTS\JAN 04 2011\REAL A-10\A10_files\images\carex-marina.xml	Carex marina		Copyright New York Botanical Garden Press - used with permission	Carex	taxon	Carex marina	Canada	United States			Alaska
F:\AUGUST 2010 PIVOT IMAGES\MASTER LINES\carex-mariposana.jpg	#211	F:\AUGUST 2010 PIVOT IMAGES\MASTER LINES\carex-mariposana.jpg	2010-07-01 14:33:19	C:\January 2011 GLOSS PIVOT DEPLOY TESTS\JAN 04 2011\REAL A-10\A10_files\images\carex-mariposana.xml	Carex mariposana		Copyright New York Botanical Garden Press - used with permission	Carex	taxon	Carex mariposana		United States						California																							Nevada
F:\AUGUST 2010 PIVOT IMAGES\MASTER LINES\carex-meadii.jpg	#212	F:\AUGUST 2010 PIVOT IMAGES\MASTER LINES\carex-meadii.jpg	2010-07-01 14:37:13	C:\January 2011 GLOSS PIVOT DEPLOY TESTS\JAN 04 2011\REAL A-10\A10_files\images\carex-meadii.xml	Carex meadii		Copyright New York Botanical Garden Press - used with permission	Carex	taxon	Carex meadii	Canada	United States	Mexico	Alabama		Arizona	Arkansas				Delaware		Georgia			Illinois	Indiana	Iowa	Kansas	Kentucky	Louisiana		Maryland		Michigan	Minnesota	Mississippi	Missouri		Nebraska			New Jersey		New York	North Carolina	North Dakota	Ohio	Oklahoma
F:\AUGUST 2010 PIVOT IMAGES\MASTER LINES\carex-membranacea.jpg	#213	F:\AUGUST 2010 PIVOT IMAGES\MASTER LINES\carex-membranacea.jpg	2010-07-01 14:44:03	C:\January 2011 GLOSS PIVOT DEPLOY TESTS\JAN 04 2011\REAL A-10\A10_files\images\carex-membranacea.xml	Carex membranacea		Copyright New York Botanical Garden Press - used with permission	Carex	taxon	Carex membranacea	Canada	United States			Alaska
F:\AUGUST 2010 PIVOT IMAGES\MASTER LINES\carex-mendocinensis.jpg	#214	F:\AUGUST 2010 PIVOT IMAGES\MASTER LINES\carex-mendocinensis.jpg	2010-07-01 14:38:52	C:\January 2011 GLOSS PIVOT DEPLOY TESTS\JAN 04 2011\REAL A-10\A10_files\images\carex-mendocinensis.xml	Carex mendocinensis		Copyright New York Botanical Garden Press - used with permission	Carex	taxon	Carex mendocinensis		United States						California
F:\AUGUST 2010 PIVOT IMAGES\MASTER LINES\carex-merritt-fernaldii.jpg	#215	F:\AUGUST 2010 PIVOT IMAGES\MASTER LINES\carex-merritt-fernaldii.jpg	2010-07-01 14:34:30	C:\January 2011 GLOSS PIVOT DEPLOY TESTS\JAN 04 2011\REAL A-10\A10_files\images\carex-merritt-fernaldii.xml	Carex merritt-fernaldii		Copyright New York Botanical Garden Press - used with permission	Carex	taxon	Carex merritt-fernaldii	Canada	United States								Connecticut									Kansas			Maine		Massachusetts	Michigan	Minnesota						New Hampshire			New York
F:\AUGUST 2010 PIVOT IMAGES\MASTER LINES\carex-mertensii.jpg	#216	F:\AUGUST 2010 PIVOT IMAGES\MASTER LINES\carex-mertensii.jpg	2010-07-01 14:41:43	C:\January 2011 GLOSS PIVOT DEPLOY TESTS\JAN 04 2011\REAL A-10\A10_files\images\carex-mertensii.xml	Carex mertensii		Copyright New York Botanical Garden Press - used with permission	Carex	taxon	Carex mertensii	Canada	United States			Alaska			California							Idaho														Montana
F:\AUGUST 2010 PIVOT IMAGES\MASTER LINES\carex-mesochorea.jpg	#217	F:\AUGUST 2010 PIVOT IMAGES\MASTER LINES\carex-mesochorea.jpg	2010-07-01 14:30:52	C:\January 2011 GLOSS PIVOT DEPLOY TESTS\JAN 04 2011\REAL A-10\A10_files\images\carex-mesochorea.xml	Carex mesochorea		Copyright New York Botanical Garden Press - used with permission	Carex	taxon	Carex mesochorea	Canada	United States		Alabama				California		Connecticut			Georgia			Illinois	Indiana		Kansas	Kentucky			Maryland	Massachusetts	Michigan			Missouri		Nebraska			New Jersey		New York	North Carolina		Ohio
F:\AUGUST 2010 PIVOT IMAGES\MASTER LINES\carex-michauxiana.jpg	#218	F:\AUGUST 2010 PIVOT IMAGES\MASTER LINES\carex-michauxiana.jpg	2010-07-01 14:43:15	C:\January 2011 GLOSS PIVOT DEPLOY TESTS\JAN 04 2011\REAL A-10\A10_files\images\carex-michauxiana.xml	Carex michauxiana		Copyright New York Botanical Garden Press - used with permission	Carex	taxon	Carex michauxiana	Canada	United States																				Maine	Maryland	Massachusetts	Michigan	Minnesota						New Hampshire			New York
F:\AUGUST 2010 PIVOT IMAGES\MASTER LINES\carex-microdonta.jpg	#219	F:\AUGUST 2010 PIVOT IMAGES\MASTER LINES\carex-microdonta.jpg	2010-07-01 14:38:05	C:\January 2011 GLOSS PIVOT DEPLOY TESTS\JAN 04 2011\REAL A-10\A10_files\images\carex-microdonta.xml	Carex microdonta		Copyright New York Botanical Garden Press - used with permission	Carex	taxon	Carex microdonta		United States		Alabama		Arizona	Arkansas					Florida							Kansas		Louisiana						Mississippi	Missouri						New Mexico					Oklahoma
F:\AUGUST 2010 PIVOT IMAGES\MASTER LINES\carex-microglochin.jpg	#220	F:\AUGUST 2010 PIVOT IMAGES\MASTER LINES\carex-microglochin.jpg	2010-07-01 14:43:10	C:\January 2011 GLOSS PIVOT DEPLOY TESTS\JAN 04 2011\REAL A-10\A10_files\images\carex-microglochin.xml	Carex microglochin		Copyright New York Botanical Garden Press - used with permission	Carex	taxon	Carex microglochin	Canada	United States			Alaska				Colorado
F:\AUGUST 2010 PIVOT IMAGES\MASTER LINES\carex-micropoda.jpg	#221	F:\AUGUST 2010 PIVOT IMAGES\MASTER LINES\carex-micropoda.jpg	2010-07-01 14:30:05	C:\January 2011 GLOSS PIVOT DEPLOY TESTS\JAN 04 2011\REAL A-10\A10_files\images\carex-micropoda.xml	Carex micropoda		Copyright New York Botanical Garden Press - used with permission	Carex	taxon	Carex micropoda	Canada	United States			Alaska			California	Colorado						Idaho														Montana		Nevada
F:\AUGUST 2010 PIVOT IMAGES\MASTER LINES\carex-microptera.jpg	#222	F:\AUGUST 2010 PIVOT IMAGES\MASTER LINES\carex-microptera.jpg	2010-07-01 14:33:09	C:\January 2011 GLOSS PIVOT DEPLOY TESTS\JAN 04 2011\REAL A-10\A10_files\images\carex-microptera.xml	Carex microptera		Copyright New York Botanical Garden Press - used with permission	Carex	taxon	Carex microptera	Canada	United States	Mexico			Arizona		California	Colorado						Idaho														Montana		Nevada			New Mexico
F:\AUGUST 2010 PIVOT IMAGES\MASTER LINES\carex-misera.jpg	#223	F:\AUGUST 2010 PIVOT IMAGES\MASTER LINES\carex-misera.jpg	2010-07-01 14:38:49	C:\January 2011 GLOSS PIVOT DEPLOY TESTS\JAN 04 2011\REAL A-10\A10_files\images\carex-misera.xml	Carex misera		Copyright New York Botanical Garden Press - used with permission	Carex	taxon	Carex misera		United States											Georgia																							North Carolina
F:\AUGUST 2010 PIVOT IMAGES\MASTER LINES\carex-mitchelliana.jpg	#224	F:\AUGUST 2010 PIVOT IMAGES\MASTER LINES\carex-mitchelliana.jpg	2010-07-01 14:42:48	C:\January 2011 GLOSS PIVOT DEPLOY TESTS\JAN 04 2011\REAL A-10\A10_files\images\carex-mitchelliana.xml	Carex mitchelliana		Copyright New York Botanical Garden Press - used with permission	Carex	taxon	Carex mitchelliana		United States		Alabama							Delaware	Florida	Georgia							Kentucky			Maryland	Massachusetts			Mississippi						New Jersey		New York	North Carolina		Ohio
F:\AUGUST 2010 PIVOT IMAGES\MASTER LINES\carex-molesta.jpg	#225	F:\AUGUST 2010 PIVOT IMAGES\MASTER LINES\carex-molesta.jpg	2010-07-01 14:34:18	C:\January 2011 GLOSS PIVOT DEPLOY TESTS\JAN 04 2011\REAL A-10\A10_files\images\carex-molesta.xml	Carex molesta		Copyright New York Botanical Garden Press - used with permission	Carex	taxon	Carex molesta	Canada	United States		Alabama			Arkansas	California		Connecticut						Illinois	Indiana	Iowa	Kansas	Kentucky			Maryland	Massachusetts	Michigan	Minnesota	Mississippi	Missouri		Nebraska		New Hampshire			New York		North Dakota	Ohio	Oklahoma
F:\AUGUST 2010 PIVOT IMAGES\MASTER LINES\carex-muhlenbergii.jpg	#226	F:\AUGUST 2010 PIVOT IMAGES\MASTER LINES\carex-muhlenbergii.jpg	2010-07-01 14:31:05	C:\January 2011 GLOSS PIVOT DEPLOY TESTS\JAN 04 2011\REAL A-10\A10_files\images\carex-muhlenbergii.xml	Carex muehlenbergii		Copyright New York Botanical Garden Press - used with permission	Carex	taxon	Carex muehlenbergii	Canada	United States		Alabama			Arkansas			Connecticut	Delaware	Florida	Georgia			Illinois	Indiana	Iowa	Kansas	Kentucky	Louisiana	Maine	Maryland	Massachusetts	Michigan	Minnesota	Mississippi	Missouri				New Hampshire	New Jersey		New York	North Carolina		Ohio	Oklahoma
F:\AUGUST 2010 PIVOT IMAGES\MASTER LINES\carex-multicaulis.jpg	#227	F:\AUGUST 2010 PIVOT IMAGES\MASTER LINES\carex-multicaulis.jpg	2010-07-01 14:36:41	C:\January 2011 GLOSS PIVOT DEPLOY TESTS\JAN 04 2011\REAL A-10\A10_files\images\carex-multicaulis.xml	Carex multicaulis		Copyright New York Botanical Garden Press - used with permission	Carex	taxon	Carex multicaulis		United States						California																							Nevada
F:\AUGUST 2010 PIVOT IMAGES\MASTER LINES\carex-multicostata.jpg	#228	F:\AUGUST 2010 PIVOT IMAGES\MASTER LINES\carex-multicostata.jpg	2010-07-01 14:34:23	C:\January 2011 GLOSS PIVOT DEPLOY TESTS\JAN 04 2011\REAL A-10\A10_files\images\carex-multicostata.xml	Carex multicostata		Copyright New York Botanical Garden Press - used with permission	Carex	taxon	Carex multicostata		United States						California							Idaho														Montana		Nevada
F:\AUGUST 2010 PIVOT IMAGES\MASTER LINES\carex-muricata.jpg	#229	F:\AUGUST 2010 PIVOT IMAGES\MASTER LINES\carex-muricata.jpg	2010-07-01 14:32:49	C:\January 2011 GLOSS PIVOT DEPLOY TESTS\JAN 04 2011\REAL A-10\A10_files\images\carex-muricata.xml	Carex muricata		Copyright New York Botanical Garden Press - used with permission	Carex	taxon	Carex muricata	Canada	United States																							Michigan
F:\AUGUST 2010 PIVOT IMAGES\MASTER LINES\carex-muskingumensis.jpg	#230	F:\AUGUST 2010 PIVOT IMAGES\MASTER LINES\carex-muskingumensis.jpg	2010-07-01 14:34:52	C:\January 2011 GLOSS PIVOT DEPLOY TESTS\JAN 04 2011\REAL A-10\A10_files\images\carex-muskingumensis.xml	Carex muskingumensis		Copyright New York Botanical Garden Press - used with permission	Carex	taxon	Carex muskingumensis	Canada	United States					Arkansas									Illinois	Indiana	Iowa	Kansas	Kentucky					Michigan	Minnesota		Missouri										Ohio	Oklahoma
F:\AUGUST 2010 PIVOT IMAGES\MASTER LINES\carex-nardina.jpg	#231	F:\AUGUST 2010 PIVOT IMAGES\MASTER LINES\carex-nardina.jpg	2010-07-01 14:29:50	C:\January 2011 GLOSS PIVOT DEPLOY TESTS\JAN 04 2011\REAL A-10\A10_files\images\carex-nardina.xml	Carex nardina		Copyright New York Botanical Garden Press - used with permission	Carex	taxon	Carex nardina	Canada	United States			Alaska				Colorado						Idaho														Montana		Nevada
F:\AUGUST 2010 PIVOT IMAGES\MASTER LINES\carex-nebraskensis.jpg	#232	F:\AUGUST 2010 PIVOT IMAGES\MASTER LINES\carex-nebraskensis.jpg	2010-07-01 14:42:12	C:\January 2011 GLOSS PIVOT DEPLOY TESTS\JAN 04 2011\REAL A-10\A10_files\images\carex-nebraskensis.xml	Carex nebrascensis		Copyright New York Botanical Garden Press - used with permission	Carex	taxon	Carex nebrascensis	Canada	United States				Arizona		California	Colorado						Idaho	Illinois			Kansas									Missouri	Montana	Nebraska	Nevada			New Mexico			North Dakota
F:\AUGUST 2010 PIVOT IMAGES\MASTER LINES\carex-nelsonii.jpg	#233	F:\AUGUST 2010 PIVOT IMAGES\MASTER LINES\carex-nelsonii.jpg	2010-07-01 14:41:24	C:\January 2011 GLOSS PIVOT DEPLOY TESTS\JAN 04 2011\REAL A-10\A10_files\images\carex-nelsonii.xml	Carex nelsonii		Copyright New York Botanical Garden Press - used with permission	Carex	taxon	Carex nelsonii		United States							Colorado																				Montana
F:\AUGUST 2010 PIVOT IMAGES\MASTER LINES\carex-nervina.jpg	#234	F:\AUGUST 2010 PIVOT IMAGES\MASTER LINES\carex-nervina.jpg	2010-07-01 14:31:48	C:\January 2011 GLOSS PIVOT DEPLOY TESTS\JAN 04 2011\REAL A-10\A10_files\images\carex-nervina.xml	Carex nervina		Copyright New York Botanical Garden Press - used with permission	Carex	taxon	Carex nervina		United States						California																							Nevada
F:\AUGUST 2010 PIVOT IMAGES\MASTER LINES\carex-neurophora.jpg	#235	F:\AUGUST 2010 PIVOT IMAGES\MASTER LINES\carex-neurophora.jpg	2010-07-01 14:31:47	C:\January 2011 GLOSS PIVOT DEPLOY TESTS\JAN 04 2011\REAL A-10\A10_files\images\carex-neurophora.xml	Carex neurophora		Copyright New York Botanical Garden Press - used with permission	Carex	taxon	Carex neurophora		United States						California	Colorado						Idaho														Montana		Nevada
F:\AUGUST 2010 PIVOT IMAGES\MASTER LINES\carex-nigricans.jpg	#236	F:\AUGUST 2010 PIVOT IMAGES\MASTER LINES\carex-nigricans.jpg	2010-07-01 14:30:03	C:\January 2011 GLOSS PIVOT DEPLOY TESTS\JAN 04 2011\REAL A-10\A10_files\images\carex-nigricans.xml	Carex nigricans		Copyright New York Botanical Garden Press - used with permission	Carex	taxon	Carex nigricans	Canada	United States			Alaska			California	Colorado																				Montana
F:\AUGUST 2010 PIVOT IMAGES\MASTER LINES\carex-nigromarginata.jpg	#237	F:\AUGUST 2010 PIVOT IMAGES\MASTER LINES\carex-nigromarginata.jpg	2010-07-01 14:35:30	C:\January 2011 GLOSS PIVOT DEPLOY TESTS\JAN 04 2011\REAL A-10\A10_files\images\carex-nigromarginata.xml	Carex nigromarginata		Copyright New York Botanical Garden Press - used with permission	Carex	taxon	Carex nigromarginata	Canada	United States	Mexico	Alabama			Arkansas			Connecticut	Delaware		Georgia			Illinois	Indiana			Kentucky	Louisiana		Maryland				Mississippi	Missouri					New Jersey		New York	North Carolina		Ohio	Oklahoma
F:\AUGUST 2010 PIVOT IMAGES\MASTER LINES\carex-normalis.jpg	#238	F:\AUGUST 2010 PIVOT IMAGES\MASTER LINES\carex-normalis.jpg	2010-07-01 14:34:14	C:\January 2011 GLOSS PIVOT DEPLOY TESTS\JAN 04 2011\REAL A-10\A10_files\images\carex-normalis.xml	Carex normalis		Copyright New York Botanical Garden Press - used with permission	Carex	taxon	Carex normalis	Canada	United States		Alabama			Arkansas			Connecticut	Delaware		Georgia			Illinois	Indiana	Iowa	Kansas	Kentucky		Maine	Maryland	Massachusetts	Michigan	Minnesota		Missouri				New Hampshire	New Jersey		New York	North Carolina		Ohio
F:\AUGUST 2010 PIVOT IMAGES\MASTER LINES\carex-nova.jpg	#239	F:\AUGUST 2010 PIVOT IMAGES\MASTER LINES\carex-nova.jpg	2010-07-01 14:41:36	C:\January 2011 GLOSS PIVOT DEPLOY TESTS\JAN 04 2011\REAL A-10\A10_files\images\carex-nova.xml	Carex nova		Copyright New York Botanical Garden Press - used with permission	Carex	taxon	Carex nova		United States							Colorado																						Nevada			New Mexico
F:\AUGUST 2010 PIVOT IMAGES\MASTER LINES\carex-novegica.jpg	#240	F:\AUGUST 2010 PIVOT IMAGES\MASTER LINES\carex-novegica.jpg	2010-07-01 14:32:17	C:\January 2011 GLOSS PIVOT DEPLOY TESTS\JAN 04 2011\REAL A-10\A10_files\images\carex-novegica.xml	Carex norvegica		Copyright New York Botanical Garden Press - used with permission	Carex	taxon	Carex norvegica	Canada	United States						California	Colorado						Idaho										Michigan				Montana	Nebraska	Nevada			New Mexico
F:\AUGUST 2010 PIVOT IMAGES\MASTER LINES\carex-nudata.jpg	#241	F:\AUGUST 2010 PIVOT IMAGES\MASTER LINES\carex-nudata.jpg	2010-07-01 14:42:39	C:\January 2011 GLOSS PIVOT DEPLOY TESTS\JAN 04 2011\REAL A-10\A10_files\images\carex-nudata.xml	Carex nudata		Copyright New York Botanical Garden Press - used with permission	Carex	taxon	Carex nudata		United States						California
F:\AUGUST 2010 PIVOT IMAGES\MASTER LINES\carex-obnupta.jpg	#242	F:\AUGUST 2010 PIVOT IMAGES\MASTER LINES\carex-obnupta.jpg	2010-07-01 14:43:02	C:\January 2011 GLOSS PIVOT DEPLOY TESTS\JAN 04 2011\REAL A-10\A10_files\images\carex-obnupta.xml	Carex obnupta		Copyright New York Botanical Garden Press - used with permission	Carex	taxon	Carex obnupta	Canada	United States						California
F:\AUGUST 2010 PIVOT IMAGES\MASTER LINES\carex-obtusata.jpg	#243	F:\AUGUST 2010 PIVOT IMAGES\MASTER LINES\carex-obtusata.jpg	2010-07-01 14:35:19	C:\January 2011 GLOSS PIVOT DEPLOY TESTS\JAN 04 2011\REAL A-10\A10_files\images\carex-obtusata.xml	Carex obtusata		Copyright New York Botanical Garden Press - used with permission	Carex	taxon	Carex obtusata	Canada	United States			Alaska				Colorado																	Minnesota			Montana					New Mexico			North Dakota
F:\AUGUST 2010 PIVOT IMAGES\MASTER LINES\carex-occidentalis.jpg	#244	F:\AUGUST 2010 PIVOT IMAGES\MASTER LINES\carex-occidentalis.jpg	2010-07-01 14:30:54	C:\January 2011 GLOSS PIVOT DEPLOY TESTS\JAN 04 2011\REAL A-10\A10_files\images\carex-occidentalis.xml	Carex occidentalis		Copyright New York Botanical Garden Press - used with permission	Carex	taxon	Carex occidentalis		United States	Mexico			Arizona		California	Colorado																				Montana		Nevada			New Mexico			North Dakota
F:\AUGUST 2010 PIVOT IMAGES\MASTER LINES\carex-oklahomensis.jpg	#245	F:\AUGUST 2010 PIVOT IMAGES\MASTER LINES\carex-oklahomensis.jpg	2010-07-01 14:31:52	C:\January 2011 GLOSS PIVOT DEPLOY TESTS\JAN 04 2011\REAL A-10\A10_files\images\carex-oklahomensis.xml	Carex oklahomensis		Copyright New York Botanical Garden Press - used with permission	Carex	taxon	Carex oklahomensis		United States					Arkansas												Kansas								Mississippi	Missouri								North Carolina			Oklahoma
F:\AUGUST 2010 PIVOT IMAGES\MASTER LINES\carex-oligocarpa.jpg	#246	F:\AUGUST 2010 PIVOT IMAGES\MASTER LINES\carex-oligocarpa.jpg	2010-07-01 14:38:07	C:\January 2011 GLOSS PIVOT DEPLOY TESTS\JAN 04 2011\REAL A-10\A10_files\images\carex-oligocarpa.xml	Carex oligocarpa		Copyright New York Botanical Garden Press - used with permission	Carex	taxon	Carex oligocarpa	Canada	United States		Alabama			Arkansas			Connecticut	Delaware	Florida	Georgia			Illinois	Indiana	Iowa	Kansas	Kentucky			Maryland	Massachusetts	Michigan	Minnesota	Mississippi	Missouri		Nebraska			New Jersey		New York	North Carolina		Ohio	Oklahoma
F:\AUGUST 2010 PIVOT IMAGES\MASTER LINES\carex-oligosperma.jpg	#247	F:\AUGUST 2010 PIVOT IMAGES\MASTER LINES\carex-oligosperma.jpg	2010-07-01 14:44:17	C:\January 2011 GLOSS PIVOT DEPLOY TESTS\JAN 04 2011\REAL A-10\A10_files\images\carex-oligosperma.xml	Carex oligosperma		Copyright New York Botanical Garden Press - used with permission	Carex	taxon	Carex oligosperma	Canada	United States								Connecticut						Illinois	Indiana					Maine		Massachusetts	Michigan	Minnesota						New Hampshire			New York	North Carolina		Ohio
F:\AUGUST 2010 PIVOT IMAGES\MASTER LINES\carex-oreocharis.jpg	#248	F:\AUGUST 2010 PIVOT IMAGES\MASTER LINES\carex-oreocharis.jpg	2010-07-01 14:35:12	C:\January 2011 GLOSS PIVOT DEPLOY TESTS\JAN 04 2011\REAL A-10\A10_files\images\carex-oreocharis.xml	Carex oreocharis		Copyright New York Botanical Garden Press - used with permission	Carex	taxon	Carex oreocharis		United States				Arizona			Colorado																									New Mexico
F:\AUGUST 2010 PIVOT IMAGES\MASTER LINES\carex-ormostachya.jpg	#249	F:\AUGUST 2010 PIVOT IMAGES\MASTER LINES\carex-ormostachya.jpg	2010-07-01 14:37:45	C:\January 2011 GLOSS PIVOT DEPLOY TESTS\JAN 04 2011\REAL A-10\A10_files\images\carex-ormostachya.xml	Carex ormostachya		Copyright New York Botanical Garden Press - used with permission	Carex	taxon	Carex ormostachya	Canada	United States								Connecticut												Maine		Massachusetts	Michigan	Minnesota						New Hampshire			New York
F:\AUGUST 2010 PIVOT IMAGES\MASTER LINES\carex-oronensis.jpg	#250	F:\AUGUST 2010 PIVOT IMAGES\MASTER LINES\carex-oronensis.jpg	2010-07-01 14:34:04	C:\January 2011 GLOSS PIVOT DEPLOY TESTS\JAN 04 2011\REAL A-10\A10_files\images\carex-oronensis.xml	Carex orenensis		Copyright New York Botanical Garden Press - used with permission	Carex	taxon	Carex orenensis	Canada	United States																				Maine
F:\AUGUST 2010 PIVOT IMAGES\MASTER LINES\carex-oxylepis.jpg	#251	F:\AUGUST 2010 PIVOT IMAGES\MASTER LINES\carex-oxylepis.jpg	2010-07-01 14:38:42	C:\January 2011 GLOSS PIVOT DEPLOY TESTS\JAN 04 2011\REAL A-10\A10_files\images\carex-oxylepis.xml	Carex oxylepis		Copyright New York Botanical Garden Press - used with permission	Carex	taxon	Carex oxylepis		United States		Alabama			Arkansas					Florida	Georgia			Illinois				Kentucky	Louisiana						Mississippi	Missouri								North Carolina			Oklahoma
F:\AUGUST 2010 PIVOT IMAGES\MASTER LINES\carex-pacystachya.jpg	#252	F:\AUGUST 2010 PIVOT IMAGES\MASTER LINES\carex-pacystachya.jpg	2010-07-01 14:33:42	C:\January 2011 GLOSS PIVOT DEPLOY TESTS\JAN 04 2011\REAL A-10\A10_files\images\carex-pacystachya.xml	Carex pachystachya		Copyright New York Botanical Garden Press - used with permission	Carex	taxon	Carex pachystachya	Canada	United States			Alaska			California	Colorado						Idaho														Montana		Nevada
F:\AUGUST 2010 PIVOT IMAGES\MASTER LINES\carex-paleacea.jpg	#253	F:\AUGUST 2010 PIVOT IMAGES\MASTER LINES\carex-paleacea.jpg	2010-07-01 14:42:53	C:\January 2011 GLOSS PIVOT DEPLOY TESTS\JAN 04 2011\REAL A-10\A10_files\images\carex-paleacea.xml	Carex paleacea		Copyright New York Botanical Garden Press - used with permission	Carex	taxon	Carex paleacea	Canada	United States																				Maine		Massachusetts
F:\AUGUST 2010 PIVOT IMAGES\MASTER LINES\carex-pallescens.jpg	#254	F:\AUGUST 2010 PIVOT IMAGES\MASTER LINES\carex-pallescens.jpg	2010-07-01 14:45:52	C:\January 2011 GLOSS PIVOT DEPLOY TESTS\JAN 04 2011\REAL A-10\A10_files\images\carex-pallescens.xml	Carex pallescens		Copyright New York Botanical Garden Press - used with permission	Carex	taxon	Carex pallescens	Canada	United States		Alabama						Connecticut						Illinois	Indiana					Maine		Massachusetts	Michigan	Minnesota						New Hampshire	New Jersey		New York			Ohio
F:\AUGUST 2010 PIVOT IMAGES\MASTER LINES\carex-panicea.jpg	#255	F:\AUGUST 2010 PIVOT IMAGES\MASTER LINES\carex-panicea.jpg	2010-07-01 14:37:10	C:\January 2011 GLOSS PIVOT DEPLOY TESTS\JAN 04 2011\REAL A-10\A10_files\images\carex-panicea.xml	Carex panicea		Copyright New York Botanical Garden Press - used with permission	Carex	taxon	Carex panicea	Canada	United States								Connecticut												Maine		Massachusetts								New Hampshire			New York
F:\AUGUST 2010 PIVOT IMAGES\MASTER LINES\carex-pansa.jpg	#256	F:\AUGUST 2010 PIVOT IMAGES\MASTER LINES\carex-pansa.jpg	2010-07-01 14:30:19	C:\January 2011 GLOSS PIVOT DEPLOY TESTS\JAN 04 2011\REAL A-10\A10_files\images\carex-pansa.xml	Carex pansa		Copyright New York Botanical Garden Press - used with permission	Carex	taxon	Carex pansa	Canada	United States						California
F:\AUGUST 2010 PIVOT IMAGES\MASTER LINES\carex-pauciflora.jpg	#257	F:\AUGUST 2010 PIVOT IMAGES\MASTER LINES\carex-pauciflora.jpg	2010-07-01 14:43:12	C:\January 2011 GLOSS PIVOT DEPLOY TESTS\JAN 04 2011\REAL A-10\A10_files\images\carex-pauciflora.xml	Carex pauciflora		Copyright New York Botanical Garden Press - used with permission	Carex	taxon	Carex pauciflora	Canada	United States			Alaska					Connecticut												Maine		Massachusetts	Michigan	Minnesota						New Hampshire			New York
F:\AUGUST 2010 PIVOT IMAGES\MASTER LINES\carex-peckii.jpg	#258	F:\AUGUST 2010 PIVOT IMAGES\MASTER LINES\carex-peckii.jpg	2010-07-01 14:35:24	C:\January 2011 GLOSS PIVOT DEPLOY TESTS\JAN 04 2011\REAL A-10\A10_files\images\carex-peckii.xml	Carex peckii		Copyright New York Botanical Garden Press - used with permission	Carex	taxon	Carex peckii	Canada	United States			Alaska				Colorado									Iowa				Maine		Massachusetts	Michigan	Minnesota				Nebraska		New Hampshire	New Jersey		New York		North Dakota	Ohio
F:\AUGUST 2010 PIVOT IMAGES\MASTER LINES\carex-pedunculata.jpg	#259	F:\AUGUST 2010 PIVOT IMAGES\MASTER LINES\carex-pedunculata.jpg	2010-07-01 14:36:17	C:\January 2011 GLOSS PIVOT DEPLOY TESTS\JAN 04 2011\REAL A-10\A10_files\images\carex-pedunculata.xml	Carex pedunculata		Copyright New York Botanical Garden Press - used with permission	Carex	taxon	Carex pedunculata	Canada	United States		Alabama						Connecticut	Delaware		Georgia			Illinois	Indiana	Iowa		Kentucky		Maine	Maryland	Massachusetts	Michigan	Minnesota						New Hampshire	New Jersey		New York	North Carolina	North Dakota	Ohio
F:\AUGUST 2010 PIVOT IMAGES\MASTER LINES\carex-pensylvanica.jpg	#260	F:\AUGUST 2010 PIVOT IMAGES\MASTER LINES\carex-pensylvanica.jpg	2010-07-01 14:35:44	C:\January 2011 GLOSS PIVOT DEPLOY TESTS\JAN 04 2011\REAL A-10\A10_files\images\carex-pensylvanica.xml	Carex pensylvanica		Copyright New York Botanical Garden Press - used with permission	Carex	taxon	Carex pensylvanica	Canada	United States		Alabama			Arkansas			Connecticut	Delaware		Georgia			Illinois	Indiana	Iowa		Kentucky			Maryland	Massachusetts	Michigan	Minnesota			Montana			New Hampshire	New Jersey		New York	North Carolina	North Dakota	Ohio
F:\AUGUST 2010 PIVOT IMAGES\MASTER LINES\carex-perglobosa.jpg	#261	F:\AUGUST 2010 PIVOT IMAGES\MASTER LINES\carex-perglobosa.jpg	2010-07-01 14:30:09	C:\January 2011 GLOSS PIVOT DEPLOY TESTS\JAN 04 2011\REAL A-10\A10_files\images\carex-perglobosa.xml	Carex perglobosa		Copyright New York Botanical Garden Press - used with permission	Carex	taxon	Carex perglobosa		United States							Colorado
F:\AUGUST 2010 PIVOT IMAGES\MASTER LINES\carex-petasata.jpg	#262	F:\AUGUST 2010 PIVOT IMAGES\MASTER LINES\carex-petasata.jpg	2010-07-01 14:33:59	C:\January 2011 GLOSS PIVOT DEPLOY TESTS\JAN 04 2011\REAL A-10\A10_files\images\carex-petasata.xml	Carex petasata		Copyright New York Botanical Garden Press - used with permission	Carex	taxon	Carex petasata	Canada	United States			Alaska	Arizona		California	Colorado						Idaho														Montana		Nevada
F:\AUGUST 2010 PIVOT IMAGES\MASTER LINES\carex-petricosa.jpg	#263	F:\AUGUST 2010 PIVOT IMAGES\MASTER LINES\carex-petricosa.jpg	2010-07-01 14:39:38	C:\January 2011 GLOSS PIVOT DEPLOY TESTS\JAN 04 2011\REAL A-10\A10_files\images\carex-petricosa.xml	Carex petricosa		Copyright New York Botanical Garden Press - used with permission	Carex	taxon	Carex petricosa	Canada	United States			Alaska																								Montana
F:\AUGUST 2010 PIVOT IMAGES\MASTER LINES\carex-phaeocephala.jpg	#264	F:\AUGUST 2010 PIVOT IMAGES\MASTER LINES\carex-phaeocephala.jpg	2010-07-01 14:33:50	C:\January 2011 GLOSS PIVOT DEPLOY TESTS\JAN 04 2011\REAL A-10\A10_files\images\carex-phaeocephala.xml	Carex phaeocephala		Copyright New York Botanical Garden Press - used with permission	Carex	taxon	Carex phaeocephala	Canada	United States			Alaska			California	Colorado						Idaho														Montana		Nevada
F:\AUGUST 2010 PIVOT IMAGES\MASTER LINES\carex-picta.jpg	#265	F:\AUGUST 2010 PIVOT IMAGES\MASTER LINES\carex-picta.jpg	2010-07-01 14:36:24	C:\January 2011 GLOSS PIVOT DEPLOY TESTS\JAN 04 2011\REAL A-10\A10_files\images\carex-picta.xml	Carex picta		Copyright New York Botanical Garden Press - used with permission	Carex	taxon	Carex picta		United States		Alabama									Georgia				Indiana			Kentucky	Louisiana						Mississippi
F:\AUGUST 2010 PIVOT IMAGES\MASTER LINES\carex-pityophila.jpg	#266	F:\AUGUST 2010 PIVOT IMAGES\MASTER LINES\carex-pityophila.jpg	2010-07-01 14:35:56	C:\January 2011 GLOSS PIVOT DEPLOY TESTS\JAN 04 2011\REAL A-10\A10_files\images\carex-pityophila.xml	Carex pityophila		Copyright New York Botanical Garden Press - used with permission	Carex	taxon	Carex pityophila		United States							Colorado																									New Mexico
F:\AUGUST 2010 PIVOT IMAGES\MASTER LINES\carex-planostachys.jpg	#267	F:\AUGUST 2010 PIVOT IMAGES\MASTER LINES\carex-planostachys.jpg	2010-07-01 14:36:34	C:\January 2011 GLOSS PIVOT DEPLOY TESTS\JAN 04 2011\REAL A-10\A10_files\images\carex-planostachys.xml	Carex planostachys		Copyright New York Botanical Garden Press - used with permission	Carex	taxon	Carex planostachys		United States				Arizona	Arkansas																											New Mexico					Oklahoma
F:\AUGUST 2010 PIVOT IMAGES\MASTER LINES\carex-plantaginea.jpg	#268	F:\AUGUST 2010 PIVOT IMAGES\MASTER LINES\carex-plantaginea.jpg	2010-07-01 14:37:26	C:\January 2011 GLOSS PIVOT DEPLOY TESTS\JAN 04 2011\REAL A-10\A10_files\images\carex-plantaginea.xml	Carex plantaginea		Copyright New York Botanical Garden Press - used with permission	Carex	taxon	Carex plantaginea	Canada	United States		Alabama						Connecticut			Georgia			Illinois	Indiana	Iowa		Kentucky		Maine	Maryland	Massachusetts	Michigan	Minnesota						New Hampshire	New Jersey		New York	North Carolina		Ohio
F:\AUGUST 2010 PIVOT IMAGES\MASTER LINES\carex-platyphylla.jpg	#269	F:\AUGUST 2010 PIVOT IMAGES\MASTER LINES\carex-platyphylla.jpg	2010-07-01 14:37:30	C:\January 2011 GLOSS PIVOT DEPLOY TESTS\JAN 04 2011\REAL A-10\A10_files\images\carex-platyphylla.xml	Carex platyphylla		Copyright New York Botanical Garden Press - used with permission	Carex	taxon	Carex platyphylla	Canada	United States		Alabama						Connecticut	Delaware		Georgia			Illinois	Indiana			Kentucky		Maine	Maryland	Massachusetts	Michigan			Missouri				New Hampshire	New Jersey		New York	North Carolina		Ohio
F:\AUGUST 2010 PIVOT IMAGES\MASTER LINES\carex-podocarpa.jpg	#270	F:\AUGUST 2010 PIVOT IMAGES\MASTER LINES\carex-podocarpa.jpg	2010-07-01 14:41:16	C:\January 2011 GLOSS PIVOT DEPLOY TESTS\JAN 04 2011\REAL A-10\A10_files\images\carex-podocarpa.xml	Carex podocarpa		Copyright New York Botanical Garden Press - used with permission	Carex	taxon	Carex podocarpa	Canada	United States			Alaska										Idaho														Montana		Nevada
F:\AUGUST 2010 PIVOT IMAGES\MASTER LINES\carex-polystachya.jpg	#271	F:\AUGUST 2010 PIVOT IMAGES\MASTER LINES\carex-polystachya.jpg	2010-07-01 14:36:54	C:\January 2011 GLOSS PIVOT DEPLOY TESTS\JAN 04 2011\REAL A-10\A10_files\images\carex-polystachya.xml	Carex polystachya		Copyright New York Botanical Garden Press - used with permission	Carex	taxon	Carex polystachya			Mexico
F:\AUGUST 2010 PIVOT IMAGES\MASTER LINES\carex-praeceptorum.jpg	#272	F:\AUGUST 2010 PIVOT IMAGES\MASTER LINES\carex-praeceptorum.jpg	2010-07-01 14:32:22	C:\January 2011 GLOSS PIVOT DEPLOY TESTS\JAN 04 2011\REAL A-10\A10_files\images\carex-praeceptorum.xml	Carex praeceptorum		Copyright New York Botanical Garden Press - used with permission	Carex	taxon	Carex praeceptorum	Canada	United States						California	Colorado						Idaho														Montana		Nevada
F:\AUGUST 2010 PIVOT IMAGES\MASTER LINES\carex-praegracilis.jpg	#273	F:\AUGUST 2010 PIVOT IMAGES\MASTER LINES\carex-praegracilis.jpg	2010-07-01 14:30:20	C:\January 2011 GLOSS PIVOT DEPLOY TESTS\JAN 04 2011\REAL A-10\A10_files\images\carex-praegracilis.xml	Carex praegracilis		Copyright New York Botanical Garden Press - used with permission	Carex	taxon	Carex praegracilis	Canada	United States	Mexico		Alaska	Arizona		California	Colorado	Connecticut	Delaware				Idaho	Illinois	Indiana	Iowa	Kansas	Kentucky		Maine			Michigan	Minnesota		Missouri	Montana	Nebraska	Nevada			New Mexico	New York		North Dakota	Ohio	Oklahoma
F:\AUGUST 2010 PIVOT IMAGES\MASTER LINES\carex-prairea.jpg	#274	F:\AUGUST 2010 PIVOT IMAGES\MASTER LINES\carex-prairea.jpg	2010-07-01 14:31:41	C:\January 2011 GLOSS PIVOT DEPLOY TESTS\JAN 04 2011\REAL A-10\A10_files\images\carex-prairea.xml	Carex prairea		Copyright New York Botanical Garden Press - used with permission	Carex	taxon	Carex prairea	Canada	United States								Connecticut					Idaho	Illinois	Indiana	Iowa				Maine		Massachusetts	Michigan	Minnesota			Montana	Nebraska			New Jersey		New York		North Dakota	Ohio
F:\AUGUST 2010 PIVOT IMAGES\MASTER LINES\carex-prasina.jpg	#275	F:\AUGUST 2010 PIVOT IMAGES\MASTER LINES\carex-prasina.jpg	2010-07-01 14:38:38	C:\January 2011 GLOSS PIVOT DEPLOY TESTS\JAN 04 2011\REAL A-10\A10_files\images\carex-prasina.xml	Carex prasina		Copyright New York Botanical Garden Press - used with permission	Carex	taxon	Carex prasina	Canada	United States		Alabama			Arkansas			Connecticut	Delaware		Georgia			Illinois	Indiana			Kentucky		Maine	Maryland	Massachusetts	Michigan		Mississippi					New Hampshire	New Jersey		New York	North Carolina		Ohio
F:\AUGUST 2010 PIVOT IMAGES\MASTER LINES\carex-praticola.jpg	#276	F:\AUGUST 2010 PIVOT IMAGES\MASTER LINES\carex-praticola.jpg	2010-07-01 14:33:54	C:\January 2011 GLOSS PIVOT DEPLOY TESTS\JAN 04 2011\REAL A-10\A10_files\images\carex-praticola.xml	Carex praticola		Copyright New York Botanical Garden Press - used with permission	Carex	taxon	Carex praticola	Canada	United States			Alaska			California	Colorado						Idaho	Illinois						Maine			Michigan	Minnesota			Montana					New Mexico			North Dakota
F:\AUGUST 2010 PIVOT IMAGES\MASTER LINES\carex-preslii.jpg	#277	F:\AUGUST 2010 PIVOT IMAGES\MASTER LINES\carex-preslii.jpg	2010-07-01 14:33:35	C:\January 2011 GLOSS PIVOT DEPLOY TESTS\JAN 04 2011\REAL A-10\A10_files\images\carex-preslii.xml	Carex preslii		Copyright New York Botanical Garden Press - used with permission	Carex	taxon	Carex preslii	Canada	United States			Alaska			California							Idaho														Montana		Nevada
F:\AUGUST 2010 PIVOT IMAGES\MASTER LINES\carex-projecta.jpg	#278	F:\AUGUST 2010 PIVOT IMAGES\MASTER LINES\carex-projecta.jpg	2010-07-01 14:34:49	C:\January 2011 GLOSS PIVOT DEPLOY TESTS\JAN 04 2011\REAL A-10\A10_files\images\carex-projecta.xml	Carex projecta		Copyright New York Botanical Garden Press - used with permission	Carex	taxon	Carex projecta	Canada	United States								Connecticut						Illinois	Indiana	Iowa				Maine	Maryland	Massachusetts	Michigan	Minnesota						New Hampshire	New Jersey		New York	North Carolina		Ohio
F:\AUGUST 2010 PIVOT IMAGES\MASTER LINES\carex-proposita.jpg	#279	F:\AUGUST 2010 PIVOT IMAGES\MASTER LINES\carex-proposita.jpg	2010-07-01 14:33:14	C:\January 2011 GLOSS PIVOT DEPLOY TESTS\JAN 04 2011\REAL A-10\A10_files\images\carex-proposita.xml	Carex proposita		Copyright New York Botanical Garden Press - used with permission	Carex	taxon	Carex proposita		United States						California							Idaho
F:\AUGUST 2010 PIVOT IMAGES\MASTER LINES\carex-psuedo-cyperus.jpg	#280	F:\AUGUST 2010 PIVOT IMAGES\MASTER LINES\carex-psuedo-cyperus.jpg	2010-07-01 14:43:27	C:\January 2011 GLOSS PIVOT DEPLOY TESTS\JAN 04 2011\REAL A-10\A10_files\images\carex-psuedo-cyperus.xml	Carex pseudocyperus		Copyright New York Botanical Garden Press - used with permission	Carex	taxon	Carex pseudocyperus	Canada	United States	Mexico							Connecticut							Indiana							Massachusetts	Michigan	Minnesota							New Jersey		New York		North Dakota	Ohio
F:\AUGUST 2010 PIVOT IMAGES\MASTER LINES\carex-purpurifera.jpg	#281	F:\AUGUST 2010 PIVOT IMAGES\MASTER LINES\carex-purpurifera.jpg	2010-07-01 14:37:43	C:\January 2011 GLOSS PIVOT DEPLOY TESTS\JAN 04 2011\REAL A-10\A10_files\images\carex-purpurifera.xml	Carex purpurifera		Copyright New York Botanical Garden Press - used with permission	Carex	taxon	Carex purpurifera		United States		Alabama									Georgia							Kentucky																North Carolina		Ohio
F:\AUGUST 2010 PIVOT IMAGES\MASTER LINES\carex-radiata.jpg	#282	F:\AUGUST 2010 PIVOT IMAGES\MASTER LINES\carex-radiata.jpg	2010-07-01 14:30:38	C:\January 2011 GLOSS PIVOT DEPLOY TESTS\JAN 04 2011\REAL A-10\A10_files\images\carex-radiata.xml	Carex radiata		Copyright New York Botanical Garden Press - used with permission	Carex	taxon	Carex radiata	Canada	United States		Alabama			Arkansas			Connecticut	Delaware		Georgia			Illinois	Indiana		Kansas	Kentucky		Maine	Maryland	Massachusetts	Michigan	Minnesota		Missouri		Nebraska		New Hampshire	New Jersey		New York	North Carolina	North Dakota	Ohio
F:\AUGUST 2010 PIVOT IMAGES\MASTER LINES\carex-rariflora.jpg	#283	F:\AUGUST 2010 PIVOT IMAGES\MASTER LINES\carex-rariflora.jpg	2010-07-01 14:40:51	C:\January 2011 GLOSS PIVOT DEPLOY TESTS\JAN 04 2011\REAL A-10\A10_files\images\carex-rariflora.xml	Carex rariflora		Copyright New York Botanical Garden Press - used with permission	Carex	taxon	Carex rariflora	Canada	United States		Alabama																		Maine
F:\AUGUST 2010 PIVOT IMAGES\MASTER LINES\carex-raynoldsii.jpg	#284	F:\AUGUST 2010 PIVOT IMAGES\MASTER LINES\carex-raynoldsii.jpg	2010-07-01 14:41:18	C:\January 2011 GLOSS PIVOT DEPLOY TESTS\JAN 04 2011\REAL A-10\A10_files\images\carex-raynoldsii.xml	Carex raynoldsii		Copyright New York Botanical Garden Press - used with permission	Carex	taxon	Carex raynoldsii	Canada	United States						California	Colorado						Idaho														Montana		Nevada
F:\AUGUST 2010 PIVOT IMAGES\MASTER LINES\carex-recta.jpg	#285	F:\AUGUST 2010 PIVOT IMAGES\MASTER LINES\carex-recta.jpg	2010-07-01 14:43:00	C:\January 2011 GLOSS PIVOT DEPLOY TESTS\JAN 04 2011\REAL A-10\A10_files\images\carex-recta.xml	Carex recta		Copyright New York Botanical Garden Press - used with permission	Carex	taxon	Carex recta	Canada	United States																														New Hampshire
F:\AUGUST 2010 PIVOT IMAGES\MASTER LINES\carex-reniformis.jpg	#286	F:\AUGUST 2010 PIVOT IMAGES\MASTER LINES\carex-reniformis.jpg	2010-07-01 14:34:35	C:\January 2011 GLOSS PIVOT DEPLOY TESTS\JAN 04 2011\REAL A-10\A10_files\images\carex-reniformis.xml	Carex reniformis		Copyright New York Botanical Garden Press - used with permission	Carex	taxon	Carex reniformis		United States		Alabama			Arkansas					Florida	Georgia			Illinois				Kentucky	Louisiana						Mississippi	Missouri								North Carolina			Oklahoma
F:\AUGUST 2010 PIVOT IMAGES\MASTER LINES\carex-retroflexa.jpg	#287	F:\AUGUST 2010 PIVOT IMAGES\MASTER LINES\carex-retroflexa.jpg	2010-07-01 14:30:31	C:\January 2011 GLOSS PIVOT DEPLOY TESTS\JAN 04 2011\REAL A-10\A10_files\images\carex-retroflexa.xml	Carex retroflexa		Copyright New York Botanical Garden Press - used with permission	Carex	taxon	Carex retroflexa	Canada	United States		Alabama			Arkansas			Connecticut	Delaware	Florida	Georgia			Illinois	Indiana	Iowa	Kansas	Kentucky	Louisiana	Maine	Maryland	Massachusetts	Michigan		Mississippi	Missouri				New Hampshire	New Jersey		New York	North Carolina		Ohio
F:\AUGUST 2010 PIVOT IMAGES\MASTER LINES\carex-retrorsa.jpg	#288	F:\AUGUST 2010 PIVOT IMAGES\MASTER LINES\carex-retrorsa.jpg	2010-07-01 14:44:14	C:\January 2011 GLOSS PIVOT DEPLOY TESTS\JAN 04 2011\REAL A-10\A10_files\images\carex-retrorsa.xml	Carex retrorsa		Copyright New York Botanical Garden Press - used with permission	Carex	taxon	Carex retrorsa	Canada	United States							Colorado	Connecticut					Idaho	Illinois	Indiana	Iowa				Maine	Maryland	Massachusetts	Michigan	Minnesota			Montana		Nevada	New Hampshire	New Jersey		New York		North Dakota	Ohio
F:\AUGUST 2010 PIVOT IMAGES\MASTER LINES\carex-richardsonii.jpg	#289	F:\AUGUST 2010 PIVOT IMAGES\MASTER LINES\carex-richardsonii.jpg	2010-07-01 14:36:22	C:\January 2011 GLOSS PIVOT DEPLOY TESTS\JAN 04 2011\REAL A-10\A10_files\images\carex-richardsonii.xml	Carex richardsonii		Copyright New York Botanical Garden Press - used with permission	Carex	taxon	Carex richardsonii	Canada	United States														Illinois	Indiana	Iowa					Maryland		Michigan	Minnesota									New York		North Dakota	Ohio
F:\AUGUST 2010 PIVOT IMAGES\MASTER LINES\carex-rosea.jpg	#290	F:\AUGUST 2010 PIVOT IMAGES\MASTER LINES\carex-rosea.jpg	2010-07-01 14:30:34	C:\January 2011 GLOSS PIVOT DEPLOY TESTS\JAN 04 2011\REAL A-10\A10_files\images\carex-rosea.xml	Carex rosea		Copyright New York Botanical Garden Press - used with permission	Carex	taxon	Carex rosea	Canada	United States		Alabama			Arkansas			Connecticut	Delaware	Florida	Georgia			Illinois	Indiana	Iowa	Kansas	Kentucky		Maine	Maryland	Massachusetts	Michigan	Minnesota	Mississippi	Missouri		Nebraska		New Hampshire	New Jersey		New York	North Carolina	North Dakota	Ohio	Oklahoma
F:\AUGUST 2010 PIVOT IMAGES\MASTER LINES\carex-rossii.jpg	#291	F:\AUGUST 2010 PIVOT IMAGES\MASTER LINES\carex-rossii.jpg	2010-07-01 14:35:54	C:\January 2011 GLOSS PIVOT DEPLOY TESTS\JAN 04 2011\REAL A-10\A10_files\images\carex-rossii.xml	Carex rossii		Copyright New York Botanical Garden Press - used with permission	Carex	taxon	Carex rossii	Canada	United States			Alaska	Arizona		California	Colorado						Idaho										Michigan	Minnesota			Montana	Nebraska	Nevada			New Mexico			North Dakota
F:\AUGUST 2010 PIVOT IMAGES\MASTER LINES\carex-rostrata.jpg	#292	F:\AUGUST 2010 PIVOT IMAGES\MASTER LINES\carex-rostrata.jpg	2010-07-01 14:44:08	C:\January 2011 GLOSS PIVOT DEPLOY TESTS\JAN 04 2011\REAL A-10\A10_files\images\carex-rostrata.xml	Carex rostrata		Copyright New York Botanical Garden Press - used with permission	Carex	taxon	Carex rostrata	Canada	United States			Alaska																				Michigan	Minnesota			Montana
F:\AUGUST 2010 PIVOT IMAGES\MASTER LINES\carex-rotundata.jpg	#293	F:\AUGUST 2010 PIVOT IMAGES\MASTER LINES\carex-rotundata.jpg	2010-07-01 14:44:05	C:\January 2011 GLOSS PIVOT DEPLOY TESTS\JAN 04 2011\REAL A-10\A10_files\images\carex-rotundata.xml	Carex rotundata		Copyright New York Botanical Garden Press - used with permission	Carex	taxon	Carex rotundata	Canada	United States			Alaska
F:\AUGUST 2010 PIVOT IMAGES\MASTER LINES\carex-rufina.jpg	#294	F:\AUGUST 2010 PIVOT IMAGES\MASTER LINES\carex-rufina.jpg	2010-07-01 14:37:00	C:\January 2011 GLOSS PIVOT DEPLOY TESTS\JAN 04 2011\REAL A-10\A10_files\images\carex-rufina.xml	Carex rufina		Copyright New York Botanical Garden Press - used with permission	Carex	taxon	Carex rufina	Canada
F:\AUGUST 2010 PIVOT IMAGES\MASTER LINES\carex-rupestris.jpg	#295	F:\AUGUST 2010 PIVOT IMAGES\MASTER LINES\carex-rupestris.jpg	2010-07-01 14:36:38	C:\January 2011 GLOSS PIVOT DEPLOY TESTS\JAN 04 2011\REAL A-10\A10_files\images\carex-rupestris.xml	Carex rupestris		Copyright New York Botanical Garden Press - used with permission	Carex	taxon	Carex rupestris	Canada	United States			Alaska				Colorado																				Montana
F:\AUGUST 2010 PIVOT IMAGES\MASTER LINES\carex-sartwelliana.jpg	#296	F:\AUGUST 2010 PIVOT IMAGES\MASTER LINES\carex-sartwelliana.jpg	2010-07-01 14:40:22	C:\January 2011 GLOSS PIVOT DEPLOY TESTS\JAN 04 2011\REAL A-10\A10_files\images\carex-sartwelliana.xml	Carex sartwelliana		Copyright New York Botanical Garden Press - used with permission	Carex	taxon	Carex sartwelliana		United States						California
F:\AUGUST 2010 PIVOT IMAGES\MASTER LINES\carex-sartwellii.jpg	#297	F:\AUGUST 2010 PIVOT IMAGES\MASTER LINES\carex-sartwellii.jpg	2010-07-01 14:30:22	C:\January 2011 GLOSS PIVOT DEPLOY TESTS\JAN 04 2011\REAL A-10\A10_files\images\carex-sartwellii.xml	Carex sartwellii		Copyright New York Botanical Garden Press - used with permission	Carex	taxon	Carex sartwellii	Canada	United States					Arkansas		Colorado							Illinois	Indiana	Iowa	Kansas				Maryland		Michigan	Minnesota		Missouri	Montana	Nebraska					New York		North Dakota	Ohio
F:\AUGUST 2010 PIVOT IMAGES\MASTER LINES\carex-saximontana.jpg	#298	F:\AUGUST 2010 PIVOT IMAGES\MASTER LINES\carex-saximontana.jpg	2010-07-01 14:35:09	C:\January 2011 GLOSS PIVOT DEPLOY TESTS\JAN 04 2011\REAL A-10\A10_files\images\carex-saximontana.xml	Carex saximontana		Copyright New York Botanical Garden Press - used with permission	Carex	taxon	Carex saximontana	Canada	United States							Colorado																	Minnesota			Montana	Nebraska							North Dakota
F:\AUGUST 2010 PIVOT IMAGES\MASTER LINES\carex-saxitalis.jpg	#299	F:\AUGUST 2010 PIVOT IMAGES\MASTER LINES\carex-saxitalis.jpg	2010-07-01 14:43:55	C:\January 2011 GLOSS PIVOT DEPLOY TESTS\JAN 04 2011\REAL A-10\A10_files\images\carex-saxitalis.xml	Carex saxatilis		Copyright New York Botanical Garden Press - used with permission	Carex	taxon	Carex saxatilis	Canada	United States			Alaska				Colorado						Idaho							Maine							Montana
F:\AUGUST 2010 PIVOT IMAGES\MASTER LINES\carex-scabrata.jpg	#300	F:\AUGUST 2010 PIVOT IMAGES\MASTER LINES\carex-scabrata.jpg	2010-07-01 14:40:39	C:\January 2011 GLOSS PIVOT DEPLOY TESTS\JAN 04 2011\REAL A-10\A10_files\images\carex-scabrata.xml	Carex scabrata		Copyright New York Botanical Garden Press - used with permission	Carex	taxon	Carex scabrata	Canada	United States		Alabama						Connecticut	Delaware		Georgia				Indiana			Kentucky		Maine	Maryland	Massachusetts	Michigan	Minnesota		Missouri				New Hampshire	New Jersey		New York	North Carolina		Ohio
F:\AUGUST 2010 PIVOT IMAGES\MASTER LINES\carex-scabriuscula.jpg	#301	F:\AUGUST 2010 PIVOT IMAGES\MASTER LINES\carex-scabriuscula.jpg	2010-07-01 14:36:16	C:\January 2011 GLOSS PIVOT DEPLOY TESTS\JAN 04 2011\REAL A-10\A10_files\images\carex-scabriuscula.xml	Carex scabriuscula		Copyright New York Botanical Garden Press - used with permission	Carex	taxon	Carex scabriuscula		United States						California
F:\AUGUST 2010 PIVOT IMAGES\MASTER LINES\carex-schweinitzii.jpg	#302	F:\AUGUST 2010 PIVOT IMAGES\MASTER LINES\carex-schweinitzii.jpg	2010-07-01 14:43:20	C:\January 2011 GLOSS PIVOT DEPLOY TESTS\JAN 04 2011\REAL A-10\A10_files\images\carex-schweinitzii.xml	Carex schweinitzii		Copyright New York Botanical Garden Press - used with permission	Carex	taxon	Carex schweinitzii	Canada	United States								Connecticut														Massachusetts	Michigan			Missouri					New Jersey		New York	North Carolina
F:\AUGUST 2010 PIVOT IMAGES\MASTER LINES\carex-scirpoidea.jpg	#303	F:\AUGUST 2010 PIVOT IMAGES\MASTER LINES\carex-scirpoidea.jpg	2010-07-01 14:36:07	C:\January 2011 GLOSS PIVOT DEPLOY TESTS\JAN 04 2011\REAL A-10\A10_files\images\carex-scirpoidea.xml	Carex scirpoidea		Copyright New York Botanical Garden Press - used with permission	Carex	taxon	Carex scirpoidea	Canada	United States			Alaska			California	Colorado						Idaho							Maine			Michigan	Minnesota			Montana		Nevada	New Hampshire			New York		North Dakota
F:\AUGUST 2010 PIVOT IMAGES\MASTER LINES\carex-scoparia.jpg	#304	F:\AUGUST 2010 PIVOT IMAGES\MASTER LINES\carex-scoparia.jpg	2010-07-01 14:34:07	C:\January 2011 GLOSS PIVOT DEPLOY TESTS\JAN 04 2011\REAL A-10\A10_files\images\carex-scoparia.xml	Carex scoparia		Copyright New York Botanical Garden Press - used with permission	Carex	taxon	Carex scoparia	Canada	United States		Alabama		Arizona	Arkansas	California	Colorado	Connecticut	Delaware		Georgia		Idaho	Illinois	Indiana	Iowa	Kansas	Kentucky	Louisiana	Maine	Maryland	Massachusetts	Michigan	Minnesota	Mississippi	Missouri	Montana	Nebraska		New Hampshire	New Jersey	New Mexico	New York	North Carolina	North Dakota	Ohio	Oklahoma
F:\AUGUST 2010 PIVOT IMAGES\MASTER LINES\carex-scopulorum.jpg	#305	F:\AUGUST 2010 PIVOT IMAGES\MASTER LINES\carex-scopulorum.jpg	2010-07-01 14:41:51	C:\January 2011 GLOSS PIVOT DEPLOY TESTS\JAN 04 2011\REAL A-10\A10_files\images\carex-scopulorum.xml	Carex scopulorum		Copyright New York Botanical Garden Press - used with permission	Carex	taxon	Carex scopulorum	Canada	United States				Arizona		California	Colorado						Idaho														Montana		Nevada
F:\AUGUST 2010 PIVOT IMAGES\MASTER LINES\carex-senta.jpg	#306	F:\AUGUST 2010 PIVOT IMAGES\MASTER LINES\carex-senta.jpg	2010-07-01 14:42:28	C:\January 2011 GLOSS PIVOT DEPLOY TESTS\JAN 04 2011\REAL A-10\A10_files\images\carex-senta.xml	Carex senta		Copyright New York Botanical Garden Press - used with permission	Carex	taxon	Carex senta		United States	Mexico			Arizona		California																										New Mexico
F:\AUGUST 2010 PIVOT IMAGES\MASTER LINES\carex-seorsa.jpg	#307	F:\AUGUST 2010 PIVOT IMAGES\MASTER LINES\carex-seorsa.jpg	2010-07-01 14:32:32	C:\January 2011 GLOSS PIVOT DEPLOY TESTS\JAN 04 2011\REAL A-10\A10_files\images\carex-seorsa.xml	Carex seorsa		Copyright New York Botanical Garden Press - used with permission	Carex	taxon	Carex seorsa	Canada	United States					Arkansas			Connecticut	Delaware	Florida	Georgia				Indiana			Kentucky			Maryland	Massachusetts	Michigan		Mississippi					New Hampshire	New Jersey		New York	North Carolina		Ohio
F:\AUGUST 2010 PIVOT IMAGES\MASTER LINES\carex-serratodens.jpg	#308	F:\AUGUST 2010 PIVOT IMAGES\MASTER LINES\carex-serratodens.jpg	2010-07-01 14:41:44	C:\January 2011 GLOSS PIVOT DEPLOY TESTS\JAN 04 2011\REAL A-10\A10_files\images\carex-serratodens.xml	Carex serratodens		Copyright New York Botanical Garden Press - used with permission	Carex	taxon	Carex serratodens		United States				Arizona		California
F:\AUGUST 2010 PIVOT IMAGES\MASTER LINES\carex-sheldonii.jpg	#309	F:\AUGUST 2010 PIVOT IMAGES\MASTER LINES\carex-sheldonii.jpg	2010-07-01 14:43:45	C:\January 2011 GLOSS PIVOT DEPLOY TESTS\JAN 04 2011\REAL A-10\A10_files\images\carex-sheldonii.xml	Carex sheldonii		Copyright New York Botanical Garden Press - used with permission	Carex	taxon	Carex sheldonii		United States						California							Idaho																Nevada
F:\AUGUST 2010 PIVOT IMAGES\MASTER LINES\carex-shortiana.jpg	#310	F:\AUGUST 2010 PIVOT IMAGES\MASTER LINES\carex-shortiana.jpg	2010-07-01 14:40:42	C:\January 2011 GLOSS PIVOT DEPLOY TESTS\JAN 04 2011\REAL A-10\A10_files\images\carex-shortiana.xml	Carex shortiana		Copyright New York Botanical Garden Press - used with permission	Carex	taxon	Carex shortiana	Canada	United States					Arkansas									Illinois	Indiana	Iowa	Kansas	Kentucky			Maryland					Missouri							New York			Ohio	Oklahoma
F:\AUGUST 2010 PIVOT IMAGES\MASTER LINES\carex-siccata.jpg	#311	F:\AUGUST 2010 PIVOT IMAGES\MASTER LINES\carex-siccata.jpg	2010-07-01 14:30:26	C:\January 2011 GLOSS PIVOT DEPLOY TESTS\JAN 04 2011\REAL A-10\A10_files\images\carex-siccata.xml	Carex siccata		Copyright New York Botanical Garden Press - used with permission	Carex	taxon	Carex siccata	Canada	United States	Mexico		Alaska	Arizona			Colorado	Connecticut						Illinois	Indiana					Maine		Massachusetts	Michigan	Minnesota						New Hampshire	New Jersey	New Mexico	New York			Ohio
F:\AUGUST 2010 PIVOT IMAGES\MASTER LINES\carex-silicea.jpg	#312	F:\AUGUST 2010 PIVOT IMAGES\MASTER LINES\carex-silicea.jpg	2010-07-01 14:34:43	C:\January 2011 GLOSS PIVOT DEPLOY TESTS\JAN 04 2011\REAL A-10\A10_files\images\carex-silicea.xml	Carex silicea		Copyright New York Botanical Garden Press - used with permission	Carex	taxon	Carex silicea	Canada	United States								Connecticut	Delaware											Maine	Maryland	Massachusetts								New Hampshire	New Jersey		New York
F:\AUGUST 2010 PIVOT IMAGES\MASTER LINES\carex-simulata.jpg	#313	F:\AUGUST 2010 PIVOT IMAGES\MASTER LINES\carex-simulata.jpg	2010-07-01 14:30:17	C:\January 2011 GLOSS PIVOT DEPLOY TESTS\JAN 04 2011\REAL A-10\A10_files\images\carex-simulata.xml	Carex simulata		Copyright New York Botanical Garden Press - used with permission	Carex	taxon	Carex simulata	Canada	United States						California	Colorado						Idaho														Montana					New Mexico
F:\AUGUST 2010 PIVOT IMAGES\MASTER LINES\carex-sparganoides (2).jpg	#314	F:\AUGUST 2010 PIVOT IMAGES\MASTER LINES\carex-sparganoides (2).jpg	2010-07-01 14:31:16	C:\January 2011 GLOSS PIVOT DEPLOY TESTS\JAN 04 2011\REAL A-10\A10_files\images\carex-sparganoides(2).xml	Carex sparganioides		Copyright New York Botanical Garden Press - used with permission	Carex	taxon	Carex sparganioides	Canada	United States		Alabama			Arkansas			Connecticut	Delaware		Georgia			Illinois	Indiana	Iowa	Kansas	Kentucky		Maine	Maryland	Massachusetts	Michigan	Minnesota		Missouri		Nebraska		New Hampshire	New Jersey		New York	North Carolina		Ohio
F:\AUGUST 2010 PIVOT IMAGES\MASTER LINES\carex-specifica.jpg	#315	F:\AUGUST 2010 PIVOT IMAGES\MASTER LINES\carex-specifica.jpg	2010-07-01 14:34:02	C:\January 2011 GLOSS PIVOT DEPLOY TESTS\JAN 04 2011\REAL A-10\A10_files\images\carex-specifica.xml	Carex specifica		Copyright New York Botanical Garden Press - used with permission	Carex	taxon	Carex specifica		United States						California																							Nevada
F:\AUGUST 2010 PIVOT IMAGES\MASTER LINES\carex-spectabilis.jpg	#316	F:\AUGUST 2010 PIVOT IMAGES\MASTER LINES\carex-spectabilis.jpg	2010-07-01 14:41:13	C:\January 2011 GLOSS PIVOT DEPLOY TESTS\JAN 04 2011\REAL A-10\A10_files\images\carex-spectabilis.xml	Carex spectabilis		Copyright New York Botanical Garden Press - used with permission	Carex	taxon	Carex spectabilis	Canada	United States			Alaska			California							Idaho														Montana
F:\AUGUST 2010 PIVOT IMAGES\MASTER LINES\carex-spicata.jpg	#317	F:\AUGUST 2010 PIVOT IMAGES\MASTER LINES\carex-spicata.jpg	2010-07-01 14:31:03	C:\January 2011 GLOSS PIVOT DEPLOY TESTS\JAN 04 2011\REAL A-10\A10_files\images\carex-spicata.xml	Carex spicata		Copyright New York Botanical Garden Press - used with permission	Carex	taxon	Carex spicata	Canada	United States								Connecticut	Delaware					Illinois						Maine	Maryland	Massachusetts	Michigan							New Hampshire	New Jersey		New York			Ohio
F:\AUGUST 2010 PIVOT IMAGES\MASTER LINES\carex-spissa.jpg	#318	F:\AUGUST 2010 PIVOT IMAGES\MASTER LINES\carex-spissa.jpg	2010-07-01 14:43:03	C:\January 2011 GLOSS PIVOT DEPLOY TESTS\JAN 04 2011\REAL A-10\A10_files\images\carex-spissa.xml	Carex spissa		Copyright New York Botanical Garden Press - used with permission	Carex	taxon	Carex spissa		United States	Mexico			Arizona		California																										New Mexico
F:\AUGUST 2010 PIVOT IMAGES\MASTER LINES\carex-sprengelii.jpg	#319	F:\AUGUST 2010 PIVOT IMAGES\MASTER LINES\carex-sprengelii.jpg	2010-07-01 14:39:20	C:\January 2011 GLOSS PIVOT DEPLOY TESTS\JAN 04 2011\REAL A-10\A10_files\images\carex-sprengelii.xml	Carex sprengelii		Copyright New York Botanical Garden Press - used with permission	Carex	taxon	Carex sprengelii	Canada	United States							Colorado	Connecticut	Delaware					Illinois	Indiana	Iowa				Maine		Massachusetts	Michigan	Minnesota		Missouri	Montana	Nebraska		New Hampshire	New Jersey		New York		North Dakota	Ohio
F:\AUGUST 2010 PIVOT IMAGES\MASTER LINES\carex-squarrosa.jpg	#320	F:\AUGUST 2010 PIVOT IMAGES\MASTER LINES\carex-squarrosa.jpg	2010-07-01 14:43:48	C:\January 2011 GLOSS PIVOT DEPLOY TESTS\JAN 04 2011\REAL A-10\A10_files\images\carex-squarrosa.xml	Carex squarrosa		Copyright New York Botanical Garden Press - used with permission	Carex	taxon	Carex squarrosa	Canada	United States		Alabama			Arkansas			Connecticut	Delaware		Georgia			Illinois	Indiana	Iowa	Kansas	Kentucky	Louisiana		Maryland		Michigan	Minnesota	Mississippi	Missouri		Nebraska			New Jersey		New York	North Carolina		Ohio	Oklahoma
F:\AUGUST 2010 PIVOT IMAGES\MASTER LINES\carex-sterilis.jpg	#321	F:\AUGUST 2010 PIVOT IMAGES\MASTER LINES\carex-sterilis.jpg	2010-07-01 14:32:46	C:\January 2011 GLOSS PIVOT DEPLOY TESTS\JAN 04 2011\REAL A-10\A10_files\images\carex-sterilis.xml	Carex sterilis		Copyright New York Botanical Garden Press - used with permission	Carex	taxon	Carex sterilis	Canada	United States		Alabama						Connecticut						Illinois	Indiana	Iowa				Maine		Massachusetts	Michigan	Minnesota		Missouri	Montana				New Jersey		New York		North Dakota	Ohio
F:\AUGUST 2010 PIVOT IMAGES\MASTER LINES\carex-stipata.jpg	#322	F:\AUGUST 2010 PIVOT IMAGES\MASTER LINES\carex-stipata.jpg	2010-07-01 14:31:54	C:\January 2011 GLOSS PIVOT DEPLOY TESTS\JAN 04 2011\REAL A-10\A10_files\images\carex-stipata.xml	Carex stipata		Copyright New York Botanical Garden Press - used with permission	Carex	taxon	Carex stipata	Canada	United States		Alabama	Alaska	Arizona	Arkansas	California	Colorado	Connecticut	Delaware	Florida	Georgia		Idaho	Illinois	Indiana	Iowa	Kansas	Kentucky	Louisiana	Maine	Maryland	Massachusetts	Michigan	Minnesota	Mississippi	Missouri	Montana	Nebraska		New Hampshire	New Jersey	New Mexico	New York	North Carolina	North Dakota	Ohio	Oklahoma
F:\AUGUST 2010 PIVOT IMAGES\MASTER LINES\carex-straminea.jpg	#323	F:\AUGUST 2010 PIVOT IMAGES\MASTER LINES\carex-straminea.jpg	2010-07-01 14:34:45	C:\January 2011 GLOSS PIVOT DEPLOY TESTS\JAN 04 2011\REAL A-10\A10_files\images\carex-straminea.xml	Carex straminea		Copyright New York Botanical Garden Press - used with permission	Carex	taxon	Carex straminea		United States								Connecticut	Delaware					Illinois	Indiana			Kentucky			Maryland	Massachusetts	Michigan			Missouri					New Jersey		New York	North Carolina		Ohio
F:\AUGUST 2010 PIVOT IMAGES\MASTER LINES\carex-straminoformis.jpg	#324	F:\AUGUST 2010 PIVOT IMAGES\MASTER LINES\carex-straminoformis.jpg	2010-07-01 14:34:25	C:\January 2011 GLOSS PIVOT DEPLOY TESTS\JAN 04 2011\REAL A-10\A10_files\images\carex-straminoformis.xml	Carex straminiformis		Copyright New York Botanical Garden Press - used with permission	Carex	taxon	Carex straminiformis		United States						California							Idaho														Montana		Nevada
F:\AUGUST 2010 PIVOT IMAGES\MASTER LINES\carex-striatula.jpg	#325	F:\AUGUST 2010 PIVOT IMAGES\MASTER LINES\carex-striatula.jpg	2010-07-01 14:37:48	C:\January 2011 GLOSS PIVOT DEPLOY TESTS\JAN 04 2011\REAL A-10\A10_files\images\carex-striatula.xml	Carex striatula		Copyright New York Botanical Garden Press - used with permission	Carex	taxon	Carex striatula	Canada	United States		Alabama			Arkansas			Connecticut	Delaware	Florida	Georgia			Illinois				Kentucky	Louisiana		Maryland		Michigan		Mississippi						New Jersey		New York	North Carolina		Ohio	Oklahoma
F:\AUGUST 2010 PIVOT IMAGES\MASTER LINES\carex-stricta.jpg	#326	F:\AUGUST 2010 PIVOT IMAGES\MASTER LINES\carex-stricta.jpg	2010-07-01 14:42:36	C:\January 2011 GLOSS PIVOT DEPLOY TESTS\JAN 04 2011\REAL A-10\A10_files\images\carex-stricta.xml	Carex stricta		Copyright New York Botanical Garden Press - used with permission	Carex	taxon	Carex stricta	Canada	United States					Arkansas			Connecticut	Delaware		Georgia			Illinois	Indiana	Iowa	Kansas	Kentucky		Maine	Maryland	Massachusetts	Michigan	Minnesota	Mississippi	Missouri		Nebraska		New Hampshire	New Jersey		New York	North Carolina	North Dakota	Ohio
F:\AUGUST 2010 PIVOT IMAGES\MASTER LINES\carex-styloflexa.jpg	#327	F:\AUGUST 2010 PIVOT IMAGES\MASTER LINES\carex-styloflexa.jpg	2010-07-01 14:37:40	C:\January 2011 GLOSS PIVOT DEPLOY TESTS\JAN 04 2011\REAL A-10\A10_files\images\carex-styloflexa.xml	Carex styloflexa		Copyright New York Botanical Garden Press - used with permission	Carex	taxon	Carex styloflexa		United States		Alabama						Connecticut	Delaware	Florida	Georgia			Illinois	Indiana			Kentucky	Louisiana		Maryland				Mississippi						New Jersey		New York	North Carolina		Ohio
F:\AUGUST 2010 PIVOT IMAGES\MASTER LINES\carex-stylosa.jpg	#328	F:\AUGUST 2010 PIVOT IMAGES\MASTER LINES\carex-stylosa.jpg	2010-07-01 14:41:09	C:\January 2011 GLOSS PIVOT DEPLOY TESTS\JAN 04 2011\REAL A-10\A10_files\images\carex-stylosa.xml	Carex stylosa		Copyright New York Botanical Garden Press - used with permission	Carex	taxon	Carex stylosa	Canada	United States			Alaska
F:\AUGUST 2010 PIVOT IMAGES\MASTER LINES\carex-subbracteata.jpg	#329	F:\AUGUST 2010 PIVOT IMAGES\MASTER LINES\carex-subbracteata.jpg	2010-07-01 14:33:40	C:\January 2011 GLOSS PIVOT DEPLOY TESTS\JAN 04 2011\REAL A-10\A10_files\images\carex-subbracteata.xml	Carex subbracteata		Copyright New York Botanical Garden Press - used with permission	Carex	taxon	Carex subbracteata		United States						California
F:\AUGUST 2010 PIVOT IMAGES\MASTER LINES\carex-suberecta.jpg	#330	F:\AUGUST 2010 PIVOT IMAGES\MASTER LINES\carex-suberecta.jpg	2010-07-01 14:34:38	C:\January 2011 GLOSS PIVOT DEPLOY TESTS\JAN 04 2011\REAL A-10\A10_files\images\carex-suberecta.xml	Carex suberecta		Copyright New York Botanical Garden Press - used with permission	Carex	taxon	Carex suberecta	Canada	United States					Arkansas									Illinois	Indiana	Iowa							Michigan	Minnesota		Missouri										Ohio
F:\AUGUST 2010 PIVOT IMAGES\MASTER LINES\carex-subfusca.jpg	#331	F:\AUGUST 2010 PIVOT IMAGES\MASTER LINES\carex-subfusca.jpg	2010-07-01 14:33:33	C:\January 2011 GLOSS PIVOT DEPLOY TESTS\JAN 04 2011\REAL A-10\A10_files\images\carex-subfusca.xml	Carex subfusca		Copyright New York Botanical Garden Press - used with permission	Carex	taxon	Carex subfusca	Canada	United States	Mexico			Arizona		California						Hawaii	Idaho																			New Mexico
F:\AUGUST 2010 PIVOT IMAGES\MASTER LINES\carex-subspathacea (2).jpg	#332	F:\AUGUST 2010 PIVOT IMAGES\MASTER LINES\carex-subspathacea (2).jpg	2010-07-01 14:42:58	C:\January 2011 GLOSS PIVOT DEPLOY TESTS\JAN 04 2011\REAL A-10\A10_files\images\carex-subspathacea(2).xml	Carex subspathacea		Copyright New York Botanical Garden Press - used with permission	Carex	taxon	Carex subspathacea	Canada	United States			Alaska
F:\AUGUST 2010 PIVOT IMAGES\MASTER LINES\carex-supina.jpg	#333	F:\AUGUST 2010 PIVOT IMAGES\MASTER LINES\carex-supina.jpg	2010-07-01 14:35:21	C:\January 2011 GLOSS PIVOT DEPLOY TESTS\JAN 04 2011\REAL A-10\A10_files\images\carex-supina.xml	Carex supina		Copyright New York Botanical Garden Press - used with permission	Carex	taxon	Carex supina	Canada	United States			Alaska																					Minnesota
F:\AUGUST 2010 PIVOT IMAGES\MASTER LINES\carex-swanii.jpg	#334	F:\AUGUST 2010 PIVOT IMAGES\MASTER LINES\carex-swanii.jpg	2010-07-01 14:45:55	C:\January 2011 GLOSS PIVOT DEPLOY TESTS\JAN 04 2011\REAL A-10\A10_files\images\carex-swanii.xml	Carex swanii		Copyright New York Botanical Garden Press - used with permission	Carex	taxon	Carex swanii	Canada	United States					Arkansas			Connecticut	Delaware		Georgia			Illinois	Indiana			Kentucky		Maine	Maryland	Massachusetts	Michigan		Mississippi	Missouri				New Hampshire	New Jersey		New York	North Carolina		Ohio	Oklahoma
F:\AUGUST 2010 PIVOT IMAGES\MASTER LINES\carex-sylvatica.jpg	#335	F:\AUGUST 2010 PIVOT IMAGES\MASTER LINES\carex-sylvatica.jpg	2010-07-01 14:39:11	C:\January 2011 GLOSS PIVOT DEPLOY TESTS\JAN 04 2011\REAL A-10\A10_files\images\carex-sylvatica.xml	Carex sylvatica		Copyright New York Botanical Garden Press - used with permission	Carex	taxon	Carex sylvatica	Canada	United States																																	New York	North Carolina
F:\AUGUST 2010 PIVOT IMAGES\MASTER LINES\carex-synchocephala.jpg	#336	F:\AUGUST 2010 PIVOT IMAGES\MASTER LINES\carex-synchocephala.jpg	2010-07-01 14:35:05	C:\January 2011 GLOSS PIVOT DEPLOY TESTS\JAN 04 2011\REAL A-10\A10_files\images\carex-synchocephala.xml	Carex sychnocephala		Copyright New York Botanical Garden Press - used with permission	Carex	taxon	Carex sychnocephala	Canada	United States			Alaska				Colorado									Iowa							Michigan	Minnesota		Missouri	Montana						New York		North Dakota
F:\AUGUST 2010 PIVOT IMAGES\MASTER LINES\carex-tenax.jpg	#337	F:\AUGUST 2010 PIVOT IMAGES\MASTER LINES\carex-tenax.jpg	2010-07-01 14:36:31	C:\January 2011 GLOSS PIVOT DEPLOY TESTS\JAN 04 2011\REAL A-10\A10_files\images\carex-tenax.xml	Carex tenax		Copyright New York Botanical Garden Press - used with permission	Carex	taxon	Carex tenax		United States		Alabama								Florida	Georgia								Louisiana						Mississippi									North Carolina
F:\AUGUST 2010 PIVOT IMAGES\MASTER LINES\carex-tenera.jpg	#338	F:\AUGUST 2010 PIVOT IMAGES\MASTER LINES\carex-tenera.jpg	2010-07-01 14:34:11	C:\January 2011 GLOSS PIVOT DEPLOY TESTS\JAN 04 2011\REAL A-10\A10_files\images\carex-tenera.xml	Carex tenera		Copyright New York Botanical Garden Press - used with permission	Carex	taxon	Carex tenera	Canada	United States		Alabama			Arkansas			Connecticut			Georgia			Illinois	Indiana	Iowa		Kentucky		Maine	Maryland	Massachusetts	Michigan	Minnesota		Missouri	Montana	Nebraska		New Hampshire	New Jersey		New York	North Carolina	North Dakota	Ohio
F:\AUGUST 2010 PIVOT IMAGES\MASTER LINES\carex-tenuiflora.jpg	#339	F:\AUGUST 2010 PIVOT IMAGES\MASTER LINES\carex-tenuiflora.jpg	2010-07-01 14:32:07	C:\January 2011 GLOSS PIVOT DEPLOY TESTS\JAN 04 2011\REAL A-10\A10_files\images\carex-tenuiflora.xml	Carex tenuiflora		Copyright New York Botanical Garden Press - used with permission	Carex	taxon	Carex tenuiflora	Canada	United States			Alaska				Colorado													Maine	Maryland	Massachusetts	Michigan	Minnesota			Montana						New York			Ohio
F:\AUGUST 2010 PIVOT IMAGES\MASTER LINES\carex-tetanica.jpg	#340	F:\AUGUST 2010 PIVOT IMAGES\MASTER LINES\carex-tetanica.jpg	2010-07-01 14:37:11	C:\January 2011 GLOSS PIVOT DEPLOY TESTS\JAN 04 2011\REAL A-10\A10_files\images\carex-tetanica.xml	Carex tetanica		Copyright New York Botanical Garden Press - used with permission	Carex	taxon	Carex tetanica	Canada	United States								Connecticut	Delaware					Illinois	Indiana	Iowa		Kentucky		Maine	Maryland	Massachusetts	Michigan	Minnesota		Missouri		Nebraska		New Hampshire	New Jersey		New York	North Carolina	North Dakota	Ohio
F:\AUGUST 2010 PIVOT IMAGES\MASTER LINES\carex-texensis.jpg	#341	F:\AUGUST 2010 PIVOT IMAGES\MASTER LINES\carex-texensis.jpg	2010-07-01 14:30:33	C:\January 2011 GLOSS PIVOT DEPLOY TESTS\JAN 04 2011\REAL A-10\A10_files\images\carex-texensis.xml	Carex texensis		Copyright New York Botanical Garden Press - used with permission	Carex	taxon	Carex texensis		United States		Alabama			Arkansas	California				Florida	Georgia						Kansas	Kentucky	Louisiana		Maryland				Mississippi	Missouri		Nebraska			New Jersey		New York	North Carolina		Ohio
F:\AUGUST 2010 PIVOT IMAGES\MASTER LINES\carex-tincta.jpg	#342	F:\AUGUST 2010 PIVOT IMAGES\MASTER LINES\carex-tincta.jpg	2010-07-01 14:34:13	C:\January 2011 GLOSS PIVOT DEPLOY TESTS\JAN 04 2011\REAL A-10\A10_files\images\carex-tincta.xml	Carex tincta		Copyright New York Botanical Garden Press - used with permission	Carex	taxon	Carex tincta	Canada	United States								Connecticut												Maine		Massachusetts	Michigan							New Hampshire		New Mexico
F:\AUGUST 2010 PIVOT IMAGES\MASTER LINES\carex-tonsa.jpg	#343	F:\AUGUST 2010 PIVOT IMAGES\MASTER LINES\carex-tonsa.jpg	2010-07-01 14:36:06	C:\January 2011 GLOSS PIVOT DEPLOY TESTS\JAN 04 2011\REAL A-10\A10_files\images\carex-tonsa.xml	Carex tonsa		Copyright New York Botanical Garden Press - used with permission	Carex	taxon	Carex tonsa	Canada	United States								Connecticut	Delaware		Georgia			Illinois	Indiana	Iowa		Kentucky		Maine	Maryland	Massachusetts	Michigan	Minnesota		Missouri				New Hampshire	New Jersey		New York			Ohio
F:\AUGUST 2010 PIVOT IMAGES\MASTER LINES\carex-torreyi.jpg	#344	F:\AUGUST 2010 PIVOT IMAGES\MASTER LINES\carex-torreyi.jpg	2010-07-01 14:39:56	C:\January 2011 GLOSS PIVOT DEPLOY TESTS\JAN 04 2011\REAL A-10\A10_files\images\carex-torreyi.xml	Carex torreyi		Copyright New York Botanical Garden Press - used with permission	Carex	taxon	Carex torreyi	Canada	United States							Colorado																	Minnesota			Montana								North Dakota
F:\AUGUST 2010 PIVOT IMAGES\MASTER LINES\carex-torta.jpg	#345	F:\AUGUST 2010 PIVOT IMAGES\MASTER LINES\carex-torta.jpg	2010-07-01 14:42:46	C:\January 2011 GLOSS PIVOT DEPLOY TESTS\JAN 04 2011\REAL A-10\A10_files\images\carex-torta.xml	Carex torta		Copyright New York Botanical Garden Press - used with permission	Carex	taxon	Carex torta	Canada	United States		Alabama			Arkansas			Connecticut	Delaware		Georgia			Illinois	Indiana			Kentucky		Maine	Maryland	Massachusetts		Minnesota	Mississippi	Missouri				New Hampshire	New Jersey		New York	North Carolina		Ohio	Oklahoma
F:\AUGUST 2010 PIVOT IMAGES\MASTER LINES\carex-triangularis.jpg	#346	F:\AUGUST 2010 PIVOT IMAGES\MASTER LINES\carex-triangularis.jpg	2010-07-01 14:31:29	C:\January 2011 GLOSS PIVOT DEPLOY TESTS\JAN 04 2011\REAL A-10\A10_files\images\carex-triangularis.xml	Carex triangularis		Copyright New York Botanical Garden Press - used with permission	Carex	taxon	Carex triangularis		United States					Arkansas												Kansas		Louisiana						Mississippi	Missouri											Oklahoma
F:\AUGUST 2010 PIVOT IMAGES\MASTER LINES\carex-tribuloides.jpg	#347	F:\AUGUST 2010 PIVOT IMAGES\MASTER LINES\carex-tribuloides.jpg	2010-07-01 14:34:47	C:\January 2011 GLOSS PIVOT DEPLOY TESTS\JAN 04 2011\REAL A-10\A10_files\images\carex-tribuloides.xml	Carex tribuloides		Copyright New York Botanical Garden Press - used with permission	Carex	taxon	Carex tribuloides	Canada	United States	Mexico	Alabama			Arkansas			Connecticut	Delaware	Florida	Georgia			Illinois	Indiana	Iowa	Kansas	Kentucky	Louisiana	Maine	Maryland	Massachusetts	Michigan	Minnesota	Mississippi	Missouri		Nebraska		New Hampshire	New Jersey		New York	North Carolina		Ohio	Oklahoma
F:\AUGUST 2010 PIVOT IMAGES\MASTER LINES\carex-trichocarpa.jpg	#348	F:\AUGUST 2010 PIVOT IMAGES\MASTER LINES\carex-trichocarpa.jpg	2010-07-01 14:43:41	C:\January 2011 GLOSS PIVOT DEPLOY TESTS\JAN 04 2011\REAL A-10\A10_files\images\carex-trichocarpa.xml	Carex trichocarpa		Copyright New York Botanical Garden Press - used with permission	Carex	taxon	Carex trichocarpa	Canada	United States								Connecticut	Delaware					Illinois	Indiana	Iowa					Maryland	Massachusetts	Michigan	Minnesota		Missouri				New Hampshire	New Jersey		New York	North Carolina		Ohio
F:\AUGUST 2010 PIVOT IMAGES\MASTER LINES\carex-trisperma.jpg	#349	F:\AUGUST 2010 PIVOT IMAGES\MASTER LINES\carex-trisperma.jpg	2010-07-01 14:32:06	C:\January 2011 GLOSS PIVOT DEPLOY TESTS\JAN 04 2011\REAL A-10\A10_files\images\carex-trisperma.xml	Carex trisperma		Copyright New York Botanical Garden Press - used with permission	Carex	taxon	Carex trisperma	Canada	United States								Connecticut	Delaware					Illinois	Indiana					Maine	Maryland	Massachusetts	Michigan	Minnesota						New Hampshire	New Jersey		New York	North Carolina		Ohio
F:\AUGUST 2010 PIVOT IMAGES\MASTER LINES\carex-tuckermanii.jpg	#350	F:\AUGUST 2010 PIVOT IMAGES\MASTER LINES\carex-tuckermanii.jpg	2010-07-01 14:44:12	C:\January 2011 GLOSS PIVOT DEPLOY TESTS\JAN 04 2011\REAL A-10\A10_files\images\carex-tuckermanii.xml	Carex tuckermanii		Copyright New York Botanical Garden Press - used with permission	Carex	taxon	Carex tuckermanii	Canada	United States								Connecticut						Illinois	Indiana	Iowa				Maine	Maryland	Massachusetts	Michigan		Mississippi					New Hampshire	New Jersey		New York			Ohio
F:\AUGUST 2010 PIVOT IMAGES\MASTER LINES\carex-tumulicola.jpg	#351	F:\AUGUST 2010 PIVOT IMAGES\MASTER LINES\carex-tumulicola.jpg	2010-07-01 14:30:58	C:\January 2011 GLOSS PIVOT DEPLOY TESTS\JAN 04 2011\REAL A-10\A10_files\images\carex-tumulicola.xml	Carex tumulicola		Copyright New York Botanical Garden Press - used with permission	Carex	taxon	Carex tumulicola	Canada	United States						California							Idaho
F:\AUGUST 2010 PIVOT IMAGES\MASTER LINES\carex-turbinata.jpg	#352	F:\AUGUST 2010 PIVOT IMAGES\MASTER LINES\carex-turbinata.jpg	2010-07-01 14:35:36	C:\January 2011 GLOSS PIVOT DEPLOY TESTS\JAN 04 2011\REAL A-10\A10_files\images\carex-turbinata.xml	Carex turbinata		Copyright New York Botanical Garden Press - used with permission	Carex	taxon	Carex turbinata		United States	Mexico			Arizona
F:\AUGUST 2010 PIVOT IMAGES\MASTER LINES\carex-turgescens.jpg	#353	F:\AUGUST 2010 PIVOT IMAGES\MASTER LINES\carex-turgescens.jpg	2010-07-01 14:40:10	C:\January 2011 GLOSS PIVOT DEPLOY TESTS\JAN 04 2011\REAL A-10\A10_files\images\carex-turgescens.xml	Carex turgescens		Copyright New York Botanical Garden Press - used with permission	Carex	taxon	Carex turgescens		United States		Alabama								Florida	Georgia								Louisiana						Mississippi									North Carolina
F:\AUGUST 2010 PIVOT IMAGES\MASTER LINES\carex-typhina.jpg	#354	F:\AUGUST 2010 PIVOT IMAGES\MASTER LINES\carex-typhina.jpg	2010-07-01 14:43:50	C:\January 2011 GLOSS PIVOT DEPLOY TESTS\JAN 04 2011\REAL A-10\A10_files\images\carex-typhina.xml	Carex typhina		Copyright New York Botanical Garden Press - used with permission	Carex	taxon	Carex typhina	Canada	United States		Alabama			Arkansas			Connecticut	Delaware	Florida	Georgia			Illinois	Indiana	Iowa		Kentucky	Louisiana	Maine	Maryland	Massachusetts	Michigan	Minnesota	Mississippi	Missouri					New Jersey		New York	North Carolina		Ohio	Oklahoma
F:\AUGUST 2010 PIVOT IMAGES\MASTER LINES\carex-umbellata.jpg	#355	F:\AUGUST 2010 PIVOT IMAGES\MASTER LINES\carex-umbellata.jpg	2010-07-01 14:36:02	C:\January 2011 GLOSS PIVOT DEPLOY TESTS\JAN 04 2011\REAL A-10\A10_files\images\carex-umbellata.xml	Carex umbellata		Copyright New York Botanical Garden Press - used with permission	Carex	taxon	Carex umbellata	Canada	United States		Alabama			Arkansas			Connecticut	Delaware		Georgia			Illinois	Indiana	Iowa	Kansas	Kentucky	Louisiana	Maine	Maryland	Massachusetts	Michigan	Minnesota	Mississippi	Missouri		Nebraska		New Hampshire	New Jersey		New York	North Carolina		Ohio
F:\AUGUST 2010 PIVOT IMAGES\MASTER LINES\carex-unilateralis.jpg	#356	F:\AUGUST 2010 PIVOT IMAGES\MASTER LINES\carex-unilateralis.jpg	2010-07-01 14:35:04	C:\January 2011 GLOSS PIVOT DEPLOY TESTS\JAN 04 2011\REAL A-10\A10_files\images\carex-unilateralis.xml	Carex unilateralis		Copyright New York Botanical Garden Press - used with permission	Carex	taxon	Carex unilateralis	Canada	United States						California							Idaho
F:\AUGUST 2010 PIVOT IMAGES\MASTER LINES\carex-ursina.jpg	#357	F:\AUGUST 2010 PIVOT IMAGES\MASTER LINES\carex-ursina.jpg	2010-07-01 14:32:11	C:\January 2011 GLOSS PIVOT DEPLOY TESTS\JAN 04 2011\REAL A-10\A10_files\images\carex-ursina.xml	Carex ursina		Copyright New York Botanical Garden Press - used with permission	Carex	taxon	Carex ursina	Canada	United States			Alaska
F:\AUGUST 2010 PIVOT IMAGES\MASTER LINES\carex-vallicola.jpg	#358	F:\AUGUST 2010 PIVOT IMAGES\MASTER LINES\carex-vallicola.jpg	2010-07-01 14:30:41	C:\January 2011 GLOSS PIVOT DEPLOY TESTS\JAN 04 2011\REAL A-10\A10_files\images\carex-vallicola.xml	Carex vallicola		Copyright New York Botanical Garden Press - used with permission	Carex	taxon	Carex vallicola	Canada	United States	Mexico			Arizona		California	Colorado						Idaho														Montana		Nevada			New Mexico
F:\AUGUST 2010 PIVOT IMAGES\MASTER LINES\carex-venusta.jpg	#359	F:\AUGUST 2010 PIVOT IMAGES\MASTER LINES\carex-venusta.jpg	2010-07-01 14:45:37	C:\January 2011 GLOSS PIVOT DEPLOY TESTS\JAN 04 2011\REAL A-10\A10_files\images\carex-venusta.xml	Carex venusta		Copyright New York Botanical Garden Press - used with permission	Carex	taxon	Carex venusta		United States		Alabama							Delaware	Florida	Georgia							Kentucky	Louisiana		Maryland				Mississippi						New Jersey		New York	North Carolina
F:\AUGUST 2010 PIVOT IMAGES\MASTER LINES\carex-vernacula.jpg	#360	F:\AUGUST 2010 PIVOT IMAGES\MASTER LINES\carex-vernacula.jpg	2010-07-01 14:30:07	C:\January 2011 GLOSS PIVOT DEPLOY TESTS\JAN 04 2011\REAL A-10\A10_files\images\carex-vernacula.xml	Carex vernacula		Copyright New York Botanical Garden Press - used with permission	Carex	taxon	Carex vernacula		United States						California	Colorado						Idaho
F:\AUGUST 2010 PIVOT IMAGES\MASTER LINES\carex-vesicaria.jpg	#361	F:\AUGUST 2010 PIVOT IMAGES\MASTER LINES\carex-vesicaria.jpg	2010-07-01 14:44:00	C:\January 2011 GLOSS PIVOT DEPLOY TESTS\JAN 04 2011\REAL A-10\A10_files\images\carex-vesicaria.xml	Carex vesicaria		Copyright New York Botanical Garden Press - used with permission	Carex	taxon	Carex vesicaria	Canada	United States				Arizona		California	Colorado	Connecticut	Delaware				Idaho	Illinois	Indiana	Iowa		Kentucky		Maine	Maryland	Massachusetts	Michigan	Minnesota		Missouri	Montana		Nevada	New Hampshire	New Jersey	New Mexico	New York		North Dakota	Ohio
F:\AUGUST 2010 PIVOT IMAGES\MASTER LINES\carex-vestita.jpg	#362	F:\AUGUST 2010 PIVOT IMAGES\MASTER LINES\carex-vestita.jpg	2010-07-01 14:40:23	C:\January 2011 GLOSS PIVOT DEPLOY TESTS\JAN 04 2011\REAL A-10\A10_files\images\carex-vestita.xml	Carex vestita		Copyright New York Botanical Garden Press - used with permission	Carex	taxon	Carex vestita		United States		Alabama						Connecticut	Delaware											Maine	Maryland	Massachusetts								New Hampshire	New Jersey		New York	North Carolina
F:\AUGUST 2010 PIVOT IMAGES\MASTER LINES\carex-virescens.jpg	#363	F:\AUGUST 2010 PIVOT IMAGES\MASTER LINES\carex-virescens.jpg	2010-07-01 14:40:00	C:\January 2011 GLOSS PIVOT DEPLOY TESTS\JAN 04 2011\REAL A-10\A10_files\images\carex-virescens.xml	Carex virescens		Copyright New York Botanical Garden Press - used with permission	Carex	taxon	Carex virescens	Canada	United States		Alabama			Arkansas			Connecticut	Delaware		Georgia			Illinois	Indiana			Kentucky		Maine	Maryland	Massachusetts	Michigan	Minnesota	Mississippi	Missouri				New Hampshire	New Jersey		New York	North Carolina		Ohio
F:\AUGUST 2010 PIVOT IMAGES\MASTER LINES\carex-viridula.jpg	#364	F:\AUGUST 2010 PIVOT IMAGES\MASTER LINES\carex-viridula.jpg	2010-07-01 14:39:26	C:\January 2011 GLOSS PIVOT DEPLOY TESTS\JAN 04 2011\REAL A-10\A10_files\images\carex-viridula.xml	Carex viridula		Copyright New York Botanical Garden Press - used with permission	Carex	taxon	Carex viridula	Canada	United States			Alaska			California	Colorado	Connecticut					Idaho	Illinois	Indiana					Maine		Massachusetts	Michigan	Minnesota			Montana		Nevada	New Hampshire	New Jersey	New Mexico	New York		North Dakota	Ohio
F:\AUGUST 2010 PIVOT IMAGES\MASTER LINES\carex-vulpinoidea.jpg	#365	F:\AUGUST 2010 PIVOT IMAGES\MASTER LINES\carex-vulpinoidea.jpg	2010-07-01 14:31:34	C:\January 2011 GLOSS PIVOT DEPLOY TESTS\JAN 04 2011\REAL A-10\A10_files\images\carex-vulpinoidea.xml	Carex vulpinoidea		Copyright New York Botanical Garden Press - used with permission	Carex	taxon	Carex vulpinoidea	Canada	United States	Mexico	Alabama		Arizona	Arkansas	California	Colorado	Connecticut	Delaware	Florida	Georgia		Idaho	Illinois	Indiana	Iowa	Kansas	Kentucky	Louisiana	Maine	Maryland	Massachusetts	Michigan	Minnesota	Mississippi	Missouri	Montana	Nebraska		New Hampshire	New Jersey	New Mexico	New York	North Carolina	North Dakota	Ohio	Oklahoma
F:\AUGUST 2010 PIVOT IMAGES\MASTER LINES\carex-weigandii.jpg	#366	F:\AUGUST 2010 PIVOT IMAGES\MASTER LINES\carex-weigandii.jpg	2010-07-01 14:32:47	C:\January 2011 GLOSS PIVOT DEPLOY TESTS\JAN 04 2011\REAL A-10\A10_files\images\carex-weigandii.xml	Carex wiegandii		Copyright New York Botanical Garden Press - used with permission	Carex	taxon	Carex wiegandii	Canada	United States																				Maine		Massachusetts	Michigan							New Hampshire			New York
F:\AUGUST 2010 PIVOT IMAGES\MASTER LINES\carex-whitneyi.jpg	#367	F:\AUGUST 2010 PIVOT IMAGES\MASTER LINES\carex-whitneyi.jpg	2010-07-01 14:45:30	C:\January 2011 GLOSS PIVOT DEPLOY TESTS\JAN 04 2011\REAL A-10\A10_files\images\carex-whitneyi.xml	Carex whitneyi		Copyright New York Botanical Garden Press - used with permission	Carex	taxon	Carex whitneyi		United States						California																							Nevada
F:\AUGUST 2010 PIVOT IMAGES\MASTER LINES\carex-willdenowii.jpg	#368	F:\AUGUST 2010 PIVOT IMAGES\MASTER LINES\carex-willdenowii.jpg	2010-07-01 14:45:23	C:\January 2011 GLOSS PIVOT DEPLOY TESTS\JAN 04 2011\REAL A-10\A10_files\images\carex-willdenowii.xml	Carex willdenowii		Copyright New York Botanical Garden Press - used with permission	Carex	taxon	Carex willdenowii	Canada	United States		Alabama			Arkansas			Connecticut	Delaware	Florida	Georgia			Illinois	Indiana			Kentucky	Louisiana		Maryland	Massachusetts		Minnesota	Mississippi						New Jersey		New York	North Carolina		Ohio
F:\AUGUST 2010 PIVOT IMAGES\MASTER LINES\carex-woodii.jpg	#369	F:\AUGUST 2010 PIVOT IMAGES\MASTER LINES\carex-woodii.jpg	2010-07-01 14:45:27	C:\January 2011 GLOSS PIVOT DEPLOY TESTS\JAN 04 2011\REAL A-10\A10_files\images\carex-woodii.xml	Carex woodii		Copyright New York Botanical Garden Press - used with permission	Carex	taxon	Carex woodii	Canada	United States								Connecticut			Georgia			Illinois	Indiana	Iowa		Kentucky			Maryland	Massachusetts		Minnesota									New York	North Carolina		Ohio
F:\AUGUST 2010 PIVOT IMAGES\MASTER LINES\carex-wootonii.jpg	#370	F:\AUGUST 2010 PIVOT IMAGES\MASTER LINES\carex-wootonii.jpg	2010-07-01 14:45:13	C:\January 2011 GLOSS PIVOT DEPLOY TESTS\JAN 04 2011\REAL A-10\A10_files\images\carex-wootonii.xml	Carex wootonii		Copyright New York Botanical Garden Press - used with permission	Carex	taxon	Carex wootonii		United States	Mexico			Arizona																												New Mexico
F:\AUGUST 2010 PIVOT IMAGES\MASTER LINES\carex-xerantica.jpg	#371	F:\AUGUST 2010 PIVOT IMAGES\MASTER LINES\carex-xerantica.jpg	2010-07-01 14:34:55	C:\January 2011 GLOSS PIVOT DEPLOY TESTS\JAN 04 2011\REAL A-10\A10_files\images\carex-xerantica.xml	Carex xerantica		Copyright New York Botanical Garden Press - used with permission	Carex	taxon	Carex xerantica	Canada	United States																											Montana	Nebraska							North Dakota
F:\AUGUST 2010 PIVOT IMAGES\MASTER LINES\cymophyllus-fraseri.jpg	#372	F:\AUGUST 2010 PIVOT IMAGES\MASTER LINES\cymophyllus-fraseri.jpg	2010-07-01 14:44:41	C:\January 2011 GLOSS PIVOT DEPLOY TESTS\JAN 04 2011\REAL A-10\A10_files\images\cymophyllus-fraseri.xml	Cymophyllus fraserianus		Copyright New York Botanical Garden Press - used with permission	Cymophyllus	taxon	Cymophyllus fraserianus		United States											Georgia							Kentucky			Maryland													North Carolina
F:\AUGUST 2010 PIVOT IMAGES\MASTER LINES\kobresia-simpliciuscula.jpg	#373	F:\AUGUST 2010 PIVOT IMAGES\MASTER LINES\kobresia-simpliciuscula.jpg	2010-07-01 14:46:13	C:\January 2011 GLOSS PIVOT DEPLOY TESTS\JAN 04 2011\REAL A-10\A10_files\images\kobresia-simpliciuscula.xml	Kobresia simpliciuscula		Copyright New York Botanical Garden Press - used with permission	Kobresia	taxon	Kobresia simpliciuscula	Canada	United States			Alaska				Colorado						Idaho
F:\AUGUST 2010 PIVOT IMAGES\MASTER LINES\legend for KKM illustrations.jpg	#374	F:\AUGUST 2010 PIVOT IMAGES\MASTER LINES\legend for KKM illustrations.jpg	2010-07-01 14:29:48	C:\January 2011 GLOSS PIVOT DEPLOY TESTS\JAN 04 2011\REAL A-10\A10_files\images\legendforKKMillustrations.xml	Legend for K. K. Mackenzie line drawings		Copyright New York Botanical Garden Press - used with permission		taxon
F:\AUGUST 2010 PIVOT IMAGES\MASTER TMJ\carex-abscondita (1).JPG	#375	F:\AUGUST 2010 PIVOT IMAGES\MASTER TMJ\carex-abscondita (1).JPG	2010-08-02 17:11:45	C:\January 2011 GLOSS PIVOT DEPLOY TESTS\JAN 04 2011\REAL A-10\A10_files\images\carex-abscondita(1).xml	Carex abscondita			Carex	taxon	Carex abscondita		United States		Alabama			Arkansas			Connecticut	Delaware	Florida	Georgia							Kentucky	Louisiana		Maryland	Massachusetts			Mississippi	Missouri					New Jersey		New York	North Carolina		Ohio	Oklahoma
F:\AUGUST 2010 PIVOT IMAGES\MASTER TMJ\carex-abscondita (4).JPG	#376	F:\AUGUST 2010 PIVOT IMAGES\MASTER TMJ\carex-abscondita (4).JPG	2010-08-02 17:11:45	C:\January 2011 GLOSS PIVOT DEPLOY TESTS\JAN 04 2011\REAL A-10\A10_files\images\carex-abscondita(4).xml	Carex abscondita			Carex	taxon	Carex abscondita		United States		Alabama			Arkansas			Connecticut	Delaware	Florida	Georgia							Kentucky	Louisiana		Maryland	Massachusetts			Mississippi	Missouri					New Jersey		New York	North Carolina		Ohio	Oklahoma
F:\AUGUST 2010 PIVOT IMAGES\MASTER TMJ\carex-abscondita (5).JPG	#377	F:\AUGUST 2010 PIVOT IMAGES\MASTER TMJ\carex-abscondita (5).JPG	2010-08-02 17:11:45	C:\January 2011 GLOSS PIVOT DEPLOY TESTS\JAN 04 2011\REAL A-10\A10_files\images\carex-abscondita(5).xml	Carex abscondita			Carex	taxon	Carex abscondita		United States		Alabama			Arkansas			Connecticut	Delaware	Florida	Georgia							Kentucky	Louisiana		Maryland	Massachusetts			Mississippi	Missouri					New Jersey		New York	North Carolina		Ohio	Oklahoma
F:\AUGUST 2010 PIVOT IMAGES\MASTER TMJ\carex-abscondita-55.JPG	#378	F:\AUGUST 2010 PIVOT IMAGES\MASTER TMJ\carex-abscondita-55.JPG	2010-08-02 17:11:45	C:\January 2011 GLOSS PIVOT DEPLOY TESTS\JAN 04 2011\REAL A-10\A10_files\images\carex-abscondita-55.xml	Carex abscondita			Carex	taxon	Carex abscondita		United States		Alabama			Arkansas			Connecticut	Delaware	Florida	Georgia							Kentucky	Louisiana		Maryland	Massachusetts			Mississippi	Missouri					New Jersey		New York	North Carolina		Ohio	Oklahoma
F:\AUGUST 2010 PIVOT IMAGES\MASTER TMJ\carex-albolutescens-habit.jpg	#379	F:\AUGUST 2010 PIVOT IMAGES\MASTER TMJ\carex-albolutescens-habit.jpg	2010-05-18 20:26:05	C:\January 2011 GLOSS PIVOT DEPLOY TESTS\JAN 04 2011\REAL A-10\A10_files\images\carex-albolutescens-habit.xml	Carex albolutescens			Carex	taxon	Carex albolutescens		United States		Alabama			Arkansas			Connecticut	Delaware	Florida	Georgia			Illinois	Indiana			Kentucky	Louisiana		Maryland	Massachusetts	Michigan		Mississippi	Missouri					New Jersey		New York	North Carolina		Ohio	Oklahoma
F:\AUGUST 2010 PIVOT IMAGES\MASTER TMJ\carex-albolutescens-habit-2.jpg	#380	F:\AUGUST 2010 PIVOT IMAGES\MASTER TMJ\carex-albolutescens-habit-2.jpg	2010-05-18 20:26:35	C:\January 2011 GLOSS PIVOT DEPLOY TESTS\JAN 04 2011\REAL A-10\A10_files\images\carex-albolutescens-habit-2.xml	Carex albolutescens			Carex	taxon	Carex albolutescens		United States		Alabama			Arkansas			Connecticut	Delaware	Florida	Georgia			Illinois	Indiana			Kentucky	Louisiana		Maryland	Massachusetts	Michigan		Mississippi	Missouri					New Jersey		New York	North Carolina		Ohio	Oklahoma
F:\AUGUST 2010 PIVOT IMAGES\MASTER TMJ\carex-albolutescens-habitat.jpg	#381	F:\AUGUST 2010 PIVOT IMAGES\MASTER TMJ\carex-albolutescens-habitat.jpg	2010-05-18 20:25:25	C:\January 2011 GLOSS PIVOT DEPLOY TESTS\JAN 04 2011\REAL A-10\A10_files\images\carex-albolutescens-habitat.xml	Carex albolutescens			Carex	taxon	Carex albolutescens		United States		Alabama			Arkansas			Connecticut	Delaware	Florida	Georgia			Illinois	Indiana			Kentucky	Louisiana		Maryland	Massachusetts	Michigan		Mississippi	Missouri					New Jersey		New York	North Carolina		Ohio	Oklahoma
F:\AUGUST 2010 PIVOT IMAGES\MASTER TMJ\carex-albolutescens-habitat-dog.jpg	#382	F:\AUGUST 2010 PIVOT IMAGES\MASTER TMJ\carex-albolutescens-habitat-dog.jpg	2010-05-18 20:25:45	C:\January 2011 GLOSS PIVOT DEPLOY TESTS\JAN 04 2011\REAL A-10\A10_files\images\carex-albolutescens-habitat-dog.xml	Carex albolutescens			Carex	taxon	Carex albolutescens		United States		Alabama			Arkansas			Connecticut	Delaware	Florida	Georgia			Illinois	Indiana			Kentucky	Louisiana		Maryland	Massachusetts	Michigan		Mississippi	Missouri					New Jersey		New York	North Carolina		Ohio	Oklahoma
F:\AUGUST 2010 PIVOT IMAGES\MASTER TMJ\carex-albolutescens-inflorescence.jpg	#383	F:\AUGUST 2010 PIVOT IMAGES\MASTER TMJ\carex-albolutescens-inflorescence.jpg	2010-05-18 20:27:10	C:\January 2011 GLOSS PIVOT DEPLOY TESTS\JAN 04 2011\REAL A-10\A10_files\images\carex-albolutescens-inflorescence.xml	Carex albolutescens			Carex	taxon	Carex albolutescens		United States		Alabama			Arkansas			Connecticut	Delaware	Florida	Georgia			Illinois	Indiana			Kentucky	Louisiana		Maryland	Massachusetts	Michigan		Mississippi	Missouri					New Jersey		New York	North Carolina		Ohio	Oklahoma
F:\AUGUST 2010 PIVOT IMAGES\MASTER TMJ\carex-albolutescens-inflorescence-2.jpg	#384	F:\AUGUST 2010 PIVOT IMAGES\MASTER TMJ\carex-albolutescens-inflorescence-2.jpg	2010-05-18 20:27:49	C:\January 2011 GLOSS PIVOT DEPLOY TESTS\JAN 04 2011\REAL A-10\A10_files\images\carex-albolutescens-inflorescence-2.xml	Carex albolutescens			Carex	taxon	Carex albolutescens		United States		Alabama			Arkansas			Connecticut	Delaware	Florida	Georgia			Illinois	Indiana			Kentucky	Louisiana		Maryland	Massachusetts	Michigan		Mississippi	Missouri					New Jersey		New York	North Carolina		Ohio	Oklahoma
F:\AUGUST 2010 PIVOT IMAGES\MASTER TMJ\carex-albursina-broad-terminal-bract.JPG	#385	F:\AUGUST 2010 PIVOT IMAGES\MASTER TMJ\carex-albursina-broad-terminal-bract.JPG	2010-08-02 17:11:45	C:\January 2011 GLOSS PIVOT DEPLOY TESTS\JAN 04 2011\REAL A-10\A10_files\images\carex-albursina-broad-terminal-bract.xml	Carex albursina			Carex	taxon	Carex albursina	Canada	United States		Alabama			Arkansas			Connecticut			Georgia			Illinois	Indiana	Iowa		Kentucky			Maryland	Massachusetts	Michigan	Minnesota		Missouri				New Hampshire	New Jersey		New York	North Carolina		Ohio	Oklahoma
F:\AUGUST 2010 PIVOT IMAGES\MASTER TMJ\carex-albursina-habit.JPG	#386	F:\AUGUST 2010 PIVOT IMAGES\MASTER TMJ\carex-albursina-habit.JPG	2010-08-02 17:11:45	C:\January 2011 GLOSS PIVOT DEPLOY TESTS\JAN 04 2011\REAL A-10\A10_files\images\carex-albursina-habit.xml	Carex albursina			Carex	taxon	Carex albursina	Canada	United States		Alabama			Arkansas			Connecticut			Georgia			Illinois	Indiana	Iowa		Kentucky			Maryland	Massachusetts	Michigan	Minnesota		Missouri				New Hampshire	New Jersey		New York	North Carolina		Ohio	Oklahoma
F:\AUGUST 2010 PIVOT IMAGES\MASTER TMJ\carex-albursina-habit-2.JPG	#387	F:\AUGUST 2010 PIVOT IMAGES\MASTER TMJ\carex-albursina-habit-2.JPG	2010-08-02 17:11:45	C:\January 2011 GLOSS PIVOT DEPLOY TESTS\JAN 04 2011\REAL A-10\A10_files\images\carex-albursina-habit-2.xml	Carex albursina			Carex	taxon	Carex albursina	Canada	United States		Alabama			Arkansas			Connecticut			Georgia			Illinois	Indiana	Iowa		Kentucky			Maryland	Massachusetts	Michigan	Minnesota		Missouri				New Hampshire	New Jersey		New York	North Carolina		Ohio	Oklahoma
F:\AUGUST 2010 PIVOT IMAGES\MASTER TMJ\carex-albursina-pistillate-spike-anthesis.JPG	#388	F:\AUGUST 2010 PIVOT IMAGES\MASTER TMJ\carex-albursina-pistillate-spike-anthesis.JPG	2010-08-02 17:11:45	C:\January 2011 GLOSS PIVOT DEPLOY TESTS\JAN 04 2011\REAL A-10\A10_files\images\carex-albursina-pistillate-spike-anthesis.xml	Carex albursina			Carex	taxon	Carex albursina	Canada	United States		Alabama			Arkansas			Connecticut			Georgia			Illinois	Indiana	Iowa		Kentucky			Maryland	Massachusetts	Michigan	Minnesota		Missouri				New Hampshire	New Jersey		New York	North Carolina		Ohio	Oklahoma
F:\AUGUST 2010 PIVOT IMAGES\MASTER TMJ\carex-albursina-staminate-terminal-spike.JPG	#389	F:\AUGUST 2010 PIVOT IMAGES\MASTER TMJ\carex-albursina-staminate-terminal-spike.JPG	2010-08-02 17:11:45	C:\January 2011 GLOSS PIVOT DEPLOY TESTS\JAN 04 2011\REAL A-10\A10_files\images\carex-albursina-staminate-terminal-spike.xml	Carex albursina			Carex	taxon	Carex albursina	Canada	United States		Alabama			Arkansas			Connecticut			Georgia			Illinois	Indiana	Iowa		Kentucky			Maryland	Massachusetts	Michigan	Minnesota		Missouri				New Hampshire	New Jersey		New York	North Carolina		Ohio	Oklahoma
F:\AUGUST 2010 PIVOT IMAGES\MASTER TMJ\carex-atlantica20070624_0042.JPG	#390	F:\AUGUST 2010 PIVOT IMAGES\MASTER TMJ\carex-atlantica20070624_0042.JPG	2010-08-02 17:11:45	C:\January 2011 GLOSS PIVOT DEPLOY TESTS\JAN 04 2011\REAL A-10\A10_files\images\carex-atlantica20070624_0042.xml	Carex atlantica			Carex	taxon	Carex atlantica	Canada	United States		Alabama			Arkansas			Connecticut	Delaware	Florida	Georgia			Illinois	Indiana			Kentucky	Louisiana	Maine	Maryland	Massachusetts	Michigan		Mississippi		Montana			New Hampshire	New Jersey		New York	North Carolina		Ohio
F:\AUGUST 2010 PIVOT IMAGES\MASTER TMJ\carex-atlantica20070625_0039.JPG	#391	F:\AUGUST 2010 PIVOT IMAGES\MASTER TMJ\carex-atlantica20070625_0039.JPG	2010-08-02 17:11:44	C:\January 2011 GLOSS PIVOT DEPLOY TESTS\JAN 04 2011\REAL A-10\A10_files\images\carex-atlantica20070625_0039.xml	Carex atlantica			Carex	taxon	Carex atlantica	Canada	United States		Alabama			Arkansas			Connecticut	Delaware	Florida	Georgia			Illinois	Indiana			Kentucky	Louisiana	Maine	Maryland	Massachusetts	Michigan		Mississippi		Montana			New Hampshire	New Jersey		New York	North Carolina		Ohio
F:\AUGUST 2010 PIVOT IMAGES\MASTER TMJ\carex-atlantica-habit.jpg	#392	F:\AUGUST 2010 PIVOT IMAGES\MASTER TMJ\carex-atlantica-habit.jpg	2010-08-02 17:11:45	C:\January 2011 GLOSS PIVOT DEPLOY TESTS\JAN 04 2011\REAL A-10\A10_files\images\carex-atlantica-habit.xml	Carex atlantica			Carex	taxon	Carex atlantica	Canada	United States		Alabama			Arkansas			Connecticut	Delaware	Florida	Georgia			Illinois	Indiana			Kentucky	Louisiana	Maine	Maryland	Massachusetts	Michigan		Mississippi		Montana			New Hampshire	New Jersey		New York	North Carolina		Ohio
F:\AUGUST 2010 PIVOT IMAGES\MASTER TMJ\carex-atlantica-inflorescence.jpg	#393	F:\AUGUST 2010 PIVOT IMAGES\MASTER TMJ\carex-atlantica-inflorescence.jpg	2010-08-02 17:11:45	C:\January 2011 GLOSS PIVOT DEPLOY TESTS\JAN 04 2011\REAL A-10\A10_files\images\carex-atlantica-inflorescence.xml	Carex atlantica			Carex	taxon	Carex atlantica	Canada	United States		Alabama			Arkansas			Connecticut	Delaware	Florida	Georgia			Illinois	Indiana			Kentucky	Louisiana	Maine	Maryland	Massachusetts	Michigan		Mississippi		Montana			New Hampshire	New Jersey		New York	North Carolina		Ohio
F:\AUGUST 2010 PIVOT IMAGES\MASTER TMJ\carex-atrosquama-habitat.jpg	#394	F:\AUGUST 2010 PIVOT IMAGES\MASTER TMJ\carex-atrosquama-habitat.jpg	2010-08-02 17:11:44	C:\January 2011 GLOSS PIVOT DEPLOY TESTS\JAN 04 2011\REAL A-10\A10_files\images\carex-atrosquama-habitat.xml	Carex atrosquama			Carex	taxon	Carex atrosquama	Canada	United States			Alaska				Colorado						Idaho														Montana
F:\AUGUST 2010 PIVOT IMAGES\MASTER TMJ\carex-atrosquama-habitat-2.jpg	#395	F:\AUGUST 2010 PIVOT IMAGES\MASTER TMJ\carex-atrosquama-habitat-2.jpg	2010-08-02 17:11:44	C:\January 2011 GLOSS PIVOT DEPLOY TESTS\JAN 04 2011\REAL A-10\A10_files\images\carex-atrosquama-habitat-2.xml	Carex atrosquama			Carex	taxon	Carex atrosquama	Canada	United States			Alaska				Colorado						Idaho														Montana
F:\AUGUST 2010 PIVOT IMAGES\MASTER TMJ\carex-atrosquama-inflorescence.jpg	#396	F:\AUGUST 2010 PIVOT IMAGES\MASTER TMJ\carex-atrosquama-inflorescence.jpg	2010-08-04 12:56:57	C:\January 2011 GLOSS PIVOT DEPLOY TESTS\JAN 04 2011\REAL A-10\A10_files\images\carex-atrosquama-inflorescence.xml	Carex atrosquama			Carex	taxon	Carex atrosquama	Canada	United States			Alaska				Colorado						Idaho														Montana
F:\AUGUST 2010 PIVOT IMAGES\MASTER TMJ\carex-atrosquama-inflorescence-2.jpg	#397	F:\AUGUST 2010 PIVOT IMAGES\MASTER TMJ\carex-atrosquama-inflorescence-2.jpg	2010-08-04 12:56:56	C:\January 2011 GLOSS PIVOT DEPLOY TESTS\JAN 04 2011\REAL A-10\A10_files\images\carex-atrosquama-inflorescence-2.xml	Carex atrosquama			Carex	taxon	Carex atrosquama	Canada	United States			Alaska				Colorado						Idaho														Montana
F:\AUGUST 2010 PIVOT IMAGES\MASTER TMJ\carex-aurea-habit.jpg	#398	F:\AUGUST 2010 PIVOT IMAGES\MASTER TMJ\carex-aurea-habit.jpg	2010-08-02 17:11:44	C:\January 2011 GLOSS PIVOT DEPLOY TESTS\JAN 04 2011\REAL A-10\A10_files\images\carex-aurea-habit.xml	Carex aurea			Carex	taxon	Carex aurea	Canada	United States			Alaska	Arizona		California	Colorado	Connecticut					Idaho	Illinois	Indiana		Kansas			Maine		Massachusetts	Michigan	Minnesota			Montana	Nebraska		New Hampshire		New Mexico	New York		North Dakota	Ohio
F:\AUGUST 2010 PIVOT IMAGES\MASTER TMJ\carex-aurea-inflorescence.jpg	#399	F:\AUGUST 2010 PIVOT IMAGES\MASTER TMJ\carex-aurea-inflorescence.jpg	2010-08-02 17:11:44	C:\January 2011 GLOSS PIVOT DEPLOY TESTS\JAN 04 2011\REAL A-10\A10_files\images\carex-aurea-inflorescence.xml	Carex aurea			Carex	taxon	Carex aurea	Canada	United States			Alaska	Arizona		California	Colorado	Connecticut					Idaho	Illinois	Indiana		Kansas			Maine		Massachusetts	Michigan	Minnesota			Montana	Nebraska		New Hampshire		New Mexico	New York		North Dakota	Ohio
F:\AUGUST 2010 PIVOT IMAGES\MASTER TMJ\carex-aurea-maturity.jpg	#400	F:\AUGUST 2010 PIVOT IMAGES\MASTER TMJ\carex-aurea-maturity.jpg	2010-08-02 17:11:44	C:\January 2011 GLOSS PIVOT DEPLOY TESTS\JAN 04 2011\REAL A-10\A10_files\images\carex-aurea-maturity.xml	Carex aurea			Carex	taxon	Carex aurea	Canada	United States			Alaska	Arizona		California	Colorado	Connecticut					Idaho	Illinois	Indiana		Kansas			Maine		Massachusetts	Michigan	Minnesota			Montana	Nebraska		New Hampshire		New Mexico	New York		North Dakota	Ohio
F:\AUGUST 2010 PIVOT IMAGES\MASTER TMJ\carex-aurea-zz-rachis.jpg	#401	F:\AUGUST 2010 PIVOT IMAGES\MASTER TMJ\carex-aurea-zz-rachis.jpg	2010-08-02 17:11:44	C:\January 2011 GLOSS PIVOT DEPLOY TESTS\JAN 04 2011\REAL A-10\A10_files\images\carex-aurea-zz-rachis.xml	Carex aurea			Carex	taxon	Carex aurea	Canada	United States			Alaska	Arizona		California	Colorado	Connecticut					Idaho	Illinois	Indiana		Kansas			Maine		Massachusetts	Michigan	Minnesota			Montana	Nebraska		New Hampshire		New Mexico	New York		North Dakota	Ohio
F:\AUGUST 2010 PIVOT IMAGES\MASTER TMJ\carex-aureolensis-habit.jpg	#402	F:\AUGUST 2010 PIVOT IMAGES\MASTER TMJ\carex-aureolensis-habit.jpg	2010-08-02 17:11:44	C:\January 2011 GLOSS PIVOT DEPLOY TESTS\JAN 04 2011\REAL A-10\A10_files\images\carex-aureolensis-habit.xml	Carex aureolensis			Carex	taxon	Carex aureolensis		United States	Mexico	Alabama			Arkansas					Florida	Georgia			Illinois			Kansas	Kentucky	Louisiana						Mississippi	Missouri		Nebraska				New Mexico		North Carolina			Oklahoma
F:\AUGUST 2010 PIVOT IMAGES\MASTER TMJ\carex-aureolensis-inflroescence.jpg	#403	F:\AUGUST 2010 PIVOT IMAGES\MASTER TMJ\carex-aureolensis-inflroescence.jpg	2010-08-02 17:11:44	C:\January 2011 GLOSS PIVOT DEPLOY TESTS\JAN 04 2011\REAL A-10\A10_files\images\carex-aureolensis-inflroescence.xml	Carex aureolensis			Carex	taxon	Carex aureolensis		United States	Mexico	Alabama			Arkansas					Florida	Georgia			Illinois			Kansas	Kentucky	Louisiana						Mississippi	Missouri		Nebraska				New Mexico		North Carolina			Oklahoma
F:\AUGUST 2010 PIVOT IMAGES\MASTER TMJ\carex-aureolensis-lateral-pistillate-spike.jpg	#404	F:\AUGUST 2010 PIVOT IMAGES\MASTER TMJ\carex-aureolensis-lateral-pistillate-spike.jpg	2010-08-02 17:11:44	C:\January 2011 GLOSS PIVOT DEPLOY TESTS\JAN 04 2011\REAL A-10\A10_files\images\carex-aureolensis-lateral-pistillate-spike.xml	Carex aureolensis			Carex	taxon	Carex aureolensis		United States	Mexico	Alabama			Arkansas					Florida	Georgia			Illinois			Kansas	Kentucky	Louisiana						Mississippi	Missouri		Nebraska				New Mexico		North Carolina			Oklahoma
F:\AUGUST 2010 PIVOT IMAGES\MASTER TMJ\carex-baileyi-mohlenbrock.jpg	#405	F:\AUGUST 2010 PIVOT IMAGES\MASTER TMJ\carex-baileyi-mohlenbrock.jpg	2010-08-02 17:11:44	C:\January 2011 GLOSS PIVOT DEPLOY TESTS\JAN 04 2011\REAL A-10\A10_files\images\carex-baileyi-mohlenbrock.xml	Carex baileyi			Carex	taxon	Carex baileyi	Canada	United States					Arkansas			Connecticut					Idaho	Illinois				Kentucky		Maine	Maryland	Massachusetts								New Hampshire			New York	North Carolina
F:\AUGUST 2010 PIVOT IMAGES\MASTER TMJ\carex-basiantha-habit.jpg	#406	F:\AUGUST 2010 PIVOT IMAGES\MASTER TMJ\carex-basiantha-habit.jpg	2010-08-02 17:11:44	C:\January 2011 GLOSS PIVOT DEPLOY TESTS\JAN 04 2011\REAL A-10\A10_files\images\carex-basiantha-habit.xml	Carex basiantha			Carex	taxon	Carex basiantha		United States		Alabama			Arkansas					Florida	Georgia								Louisiana						Mississippi									North Carolina
F:\AUGUST 2010 PIVOT IMAGES\MASTER TMJ\carex-basiantha-inflorescence.jpg	#407	F:\AUGUST 2010 PIVOT IMAGES\MASTER TMJ\carex-basiantha-inflorescence.jpg	2010-08-02 17:11:44	C:\January 2011 GLOSS PIVOT DEPLOY TESTS\JAN 04 2011\REAL A-10\A10_files\images\carex-basiantha-inflorescence.xml	Carex basiantha			Carex	taxon	Carex basiantha		United States		Alabama			Arkansas					Florida	Georgia								Louisiana						Mississippi									North Carolina
F:\AUGUST 2010 PIVOT IMAGES\MASTER TMJ\carex-basiantha-inflorescence-terminal-spike-staminate.jpg	#408	F:\AUGUST 2010 PIVOT IMAGES\MASTER TMJ\carex-basiantha-inflorescence-terminal-spike-staminate.jpg	2010-08-02 17:11:44	C:\January 2011 GLOSS PIVOT DEPLOY TESTS\JAN 04 2011\REAL A-10\A10_files\images\carex-basiantha-inflorescence-terminal-spike-staminate.xml	Carex basiantha			Carex	taxon	Carex basiantha		United States		Alabama			Arkansas					Florida	Georgia								Louisiana						Mississippi									North Carolina
F:\AUGUST 2010 PIVOT IMAGES\MASTER TMJ\carex-basiantha-inflorescence-with-leaves.jpg	#409	F:\AUGUST 2010 PIVOT IMAGES\MASTER TMJ\carex-basiantha-inflorescence-with-leaves.jpg	2010-08-02 17:11:44	C:\January 2011 GLOSS PIVOT DEPLOY TESTS\JAN 04 2011\REAL A-10\A10_files\images\carex-basiantha-inflorescence-with-leaves.xml	Carex basiantha			Carex	taxon	Carex basiantha		United States		Alabama			Arkansas					Florida	Georgia								Louisiana						Mississippi									North Carolina
F:\AUGUST 2010 PIVOT IMAGES\MASTER TMJ\carex-blanda-anthesis.jpg	#410	F:\AUGUST 2010 PIVOT IMAGES\MASTER TMJ\carex-blanda-anthesis.jpg	2010-08-02 17:11:44	C:\January 2011 GLOSS PIVOT DEPLOY TESTS\JAN 04 2011\REAL A-10\A10_files\images\carex-blanda-anthesis.xml	Carex blanda			Carex	taxon	Carex blanda	Canada	United States		Alabama			Arkansas		Colorado	Connecticut	Delaware	Florida	Georgia			Illinois	Indiana	Iowa	Kansas	Kentucky	Louisiana	Maine	Maryland	Massachusetts	Michigan	Minnesota	Mississippi	Missouri		Nebraska		New Hampshire	New Jersey	New Mexico	New York	North Carolina	North Dakota	Ohio	Oklahoma
F:\AUGUST 2010 PIVOT IMAGES\MASTER TMJ\carex-blanda-lateral-spike-post-anthesis.jpg	#411	F:\AUGUST 2010 PIVOT IMAGES\MASTER TMJ\carex-blanda-lateral-spike-post-anthesis.jpg	2010-08-02 17:11:44	C:\January 2011 GLOSS PIVOT DEPLOY TESTS\JAN 04 2011\REAL A-10\A10_files\images\carex-blanda-lateral-spike-post-anthesis.xml	Carex blanda			Carex	taxon	Carex blanda	Canada	United States		Alabama			Arkansas		Colorado	Connecticut	Delaware	Florida	Georgia			Illinois	Indiana	Iowa	Kansas	Kentucky	Louisiana	Maine	Maryland	Massachusetts	Michigan	Minnesota	Mississippi	Missouri		Nebraska		New Hampshire	New Jersey	New Mexico	New York	North Carolina	North Dakota	Ohio	Oklahoma
F:\AUGUST 2010 PIVOT IMAGES\MASTER TMJ\carex-blanda-terminal-spike-anthesis.jpg	#412	F:\AUGUST 2010 PIVOT IMAGES\MASTER TMJ\carex-blanda-terminal-spike-anthesis.jpg	2010-08-02 17:11:44	C:\January 2011 GLOSS PIVOT DEPLOY TESTS\JAN 04 2011\REAL A-10\A10_files\images\carex-blanda-terminal-spike-anthesis.xml	Carex blanda			Carex	taxon	Carex blanda	Canada	United States		Alabama			Arkansas		Colorado	Connecticut	Delaware	Florida	Georgia			Illinois	Indiana	Iowa	Kansas	Kentucky	Louisiana	Maine	Maryland	Massachusetts	Michigan	Minnesota	Mississippi	Missouri		Nebraska		New Hampshire	New Jersey	New Mexico	New York	North Carolina	North Dakota	Ohio	Oklahoma
F:\AUGUST 2010 PIVOT IMAGES\MASTER TMJ\carex-bromoides-habitat.jpg	#413	F:\AUGUST 2010 PIVOT IMAGES\MASTER TMJ\carex-bromoides-habitat.jpg	2010-08-02 17:11:44	C:\January 2011 GLOSS PIVOT DEPLOY TESTS\JAN 04 2011\REAL A-10\A10_files\images\carex-bromoides-habitat.xml	Carex bromoides			Carex	taxon	Carex bromoides	Canada	United States	Mexico	Alabama			Arkansas			Connecticut	Delaware	Florida	Georgia			Illinois	Indiana			Kentucky	Louisiana	Maine	Maryland	Massachusetts	Michigan	Minnesota	Mississippi	Missouri				New Hampshire	New Jersey		New York	North Carolina		Ohio
F:\AUGUST 2010 PIVOT IMAGES\MASTER TMJ\carex-bromoides-habitat-3.JPG	#414	F:\AUGUST 2010 PIVOT IMAGES\MASTER TMJ\carex-bromoides-habitat-3.JPG	2010-08-02 17:11:44	C:\January 2011 GLOSS PIVOT DEPLOY TESTS\JAN 04 2011\REAL A-10\A10_files\images\carex-bromoides-habitat-3.xml	Carex bromoides			Carex	taxon	Carex bromoides	Canada	United States	Mexico	Alabama			Arkansas			Connecticut	Delaware	Florida	Georgia			Illinois	Indiana			Kentucky	Louisiana	Maine	Maryland	Massachusetts	Michigan	Minnesota	Mississippi	Missouri				New Hampshire	New Jersey		New York	North Carolina		Ohio
F:\AUGUST 2010 PIVOT IMAGES\MASTER TMJ\carex-buxbaumii-anthesis.jpg	#415	F:\AUGUST 2010 PIVOT IMAGES\MASTER TMJ\carex-buxbaumii-anthesis.jpg	2010-08-02 17:11:44	C:\January 2011 GLOSS PIVOT DEPLOY TESTS\JAN 04 2011\REAL A-10\A10_files\images\carex-buxbaumii-anthesis.xml	Carex buxbaumii			Carex	taxon	Carex buxbaumii	Canada	United States			Alaska		Arkansas	California	Colorado	Connecticut	Delaware		Georgia		Idaho	Illinois	Indiana	Iowa	Kansas	Kentucky		Maine	Maryland	Massachusetts	Michigan	Minnesota		Missouri	Montana	Nebraska	Nevada	New Hampshire	New Jersey		New York	North Carolina	North Dakota	Ohio
F:\AUGUST 2010 PIVOT IMAGES\MASTER TMJ\carex-buxbaumii-habitat.jpg	#416	F:\AUGUST 2010 PIVOT IMAGES\MASTER TMJ\carex-buxbaumii-habitat.jpg	2010-08-02 17:11:44	C:\January 2011 GLOSS PIVOT DEPLOY TESTS\JAN 04 2011\REAL A-10\A10_files\images\carex-buxbaumii-habitat.xml	Carex buxbaumii			Carex	taxon	Carex buxbaumii	Canada	United States			Alaska		Arkansas	California	Colorado	Connecticut	Delaware		Georgia		Idaho	Illinois	Indiana	Iowa	Kansas	Kentucky		Maine	Maryland	Massachusetts	Michigan	Minnesota		Missouri	Montana	Nebraska	Nevada	New Hampshire	New Jersey		New York	North Carolina	North Dakota	Ohio
F:\AUGUST 2010 PIVOT IMAGES\MASTER TMJ\carex-buxbaumii-inflorescence.jpg	#417	F:\AUGUST 2010 PIVOT IMAGES\MASTER TMJ\carex-buxbaumii-inflorescence.jpg	2010-08-02 17:11:44	C:\January 2011 GLOSS PIVOT DEPLOY TESTS\JAN 04 2011\REAL A-10\A10_files\images\carex-buxbaumii-inflorescence.xml	Carex buxbaumii			Carex	taxon	Carex buxbaumii	Canada	United States			Alaska		Arkansas	California	Colorado	Connecticut	Delaware		Georgia		Idaho	Illinois	Indiana	Iowa	Kansas	Kentucky		Maine	Maryland	Massachusetts	Michigan	Minnesota		Missouri	Montana	Nebraska	Nevada	New Hampshire	New Jersey		New York	North Carolina	North Dakota	Ohio
F:\AUGUST 2010 PIVOT IMAGES\MASTER TMJ\carex-buxbaumii-inflorescence2.jpg	#418	F:\AUGUST 2010 PIVOT IMAGES\MASTER TMJ\carex-buxbaumii-inflorescence2.jpg	2010-08-02 17:11:44	C:\January 2011 GLOSS PIVOT DEPLOY TESTS\JAN 04 2011\REAL A-10\A10_files\images\carex-buxbaumii-inflorescence2.xml	Carex buxbaumii			Carex	taxon	Carex buxbaumii	Canada	United States			Alaska		Arkansas	California	Colorado	Connecticut	Delaware		Georgia		Idaho	Illinois	Indiana	Iowa	Kansas	Kentucky		Maine	Maryland	Massachusetts	Michigan	Minnesota		Missouri	Montana	Nebraska	Nevada	New Hampshire	New Jersey		New York	North Carolina	North Dakota	Ohio
F:\AUGUST 2010 PIVOT IMAGES\MASTER TMJ\carex-buxbaumii-lateral-pistillate-spike.jpg	#419	F:\AUGUST 2010 PIVOT IMAGES\MASTER TMJ\carex-buxbaumii-lateral-pistillate-spike.jpg	2010-08-02 17:11:44	C:\January 2011 GLOSS PIVOT DEPLOY TESTS\JAN 04 2011\REAL A-10\A10_files\images\carex-buxbaumii-lateral-pistillate-spike.xml	Carex buxbaumii			Carex	taxon	Carex buxbaumii	Canada	United States			Alaska		Arkansas	California	Colorado	Connecticut	Delaware		Georgia		Idaho	Illinois	Indiana	Iowa	Kansas	Kentucky		Maine	Maryland	Massachusetts	Michigan	Minnesota		Missouri	Montana	Nebraska	Nevada	New Hampshire	New Jersey		New York	North Carolina	North Dakota	Ohio
F:\AUGUST 2010 PIVOT IMAGES\MASTER TMJ\carex-buxbaumii-post-anthesis-inflorescence.jpg	#420	F:\AUGUST 2010 PIVOT IMAGES\MASTER TMJ\carex-buxbaumii-post-anthesis-inflorescence.jpg	2010-08-02 17:11:44	C:\January 2011 GLOSS PIVOT DEPLOY TESTS\JAN 04 2011\REAL A-10\A10_files\images\carex-buxbaumii-post-anthesis-inflorescence.xml	Carex buxbaumii			Carex	taxon	Carex buxbaumii	Canada	United States			Alaska		Arkansas	California	Colorado	Connecticut	Delaware		Georgia		Idaho	Illinois	Indiana	Iowa	Kansas	Kentucky		Maine	Maryland	Massachusetts	Michigan	Minnesota		Missouri	Montana	Nebraska	Nevada	New Hampshire	New Jersey		New York	North Carolina	North Dakota	Ohio
F:\AUGUST 2010 PIVOT IMAGES\MASTER TMJ\carex-canescens-inflorescence.jpg	#421	F:\AUGUST 2010 PIVOT IMAGES\MASTER TMJ\carex-canescens-inflorescence.jpg	2010-08-02 17:11:44	C:\January 2011 GLOSS PIVOT DEPLOY TESTS\JAN 04 2011\REAL A-10\A10_files\images\carex-canescens-inflorescence.xml	Carex canescens			Carex	taxon	Carex canescens	Canada	United States			Alaska	Arizona		California	Colorado	Connecticut	Delaware				Idaho		Indiana					Maine	Maryland	Massachusetts	Michigan	Minnesota			Montana		Nevada	New Hampshire	New Jersey	New Mexico	New York			Ohio
F:\AUGUST 2010 PIVOT IMAGES\MASTER TMJ\carex-canescens-post-anthesis.jpg	#422	F:\AUGUST 2010 PIVOT IMAGES\MASTER TMJ\carex-canescens-post-anthesis.jpg	2010-08-02 17:11:44	C:\January 2011 GLOSS PIVOT DEPLOY TESTS\JAN 04 2011\REAL A-10\A10_files\images\carex-canescens-post-anthesis.xml	Carex canescens			Carex	taxon	Carex canescens	Canada	United States			Alaska	Arizona		California	Colorado	Connecticut	Delaware				Idaho		Indiana					Maine	Maryland	Massachusetts	Michigan	Minnesota			Montana		Nevada	New Hampshire	New Jersey	New Mexico	New York			Ohio
F:\AUGUST 2010 PIVOT IMAGES\MASTER TMJ\carex-canescens-post-anthesis-2.jpg	#423	F:\AUGUST 2010 PIVOT IMAGES\MASTER TMJ\carex-canescens-post-anthesis-2.jpg	2010-08-02 17:11:44	C:\January 2011 GLOSS PIVOT DEPLOY TESTS\JAN 04 2011\REAL A-10\A10_files\images\carex-canescens-post-anthesis-2.xml	Carex canescens			Carex	taxon	Carex canescens	Canada	United States			Alaska	Arizona		California	Colorado	Connecticut	Delaware				Idaho		Indiana					Maine	Maryland	Massachusetts	Michigan	Minnesota			Montana		Nevada	New Hampshire	New Jersey	New Mexico	New York			Ohio
F:\AUGUST 2010 PIVOT IMAGES\MASTER TMJ\carex-cephalophora20070602_0045.JPG	#424	F:\AUGUST 2010 PIVOT IMAGES\MASTER TMJ\carex-cephalophora20070602_0045.JPG	2010-08-02 17:11:43	C:\January 2011 GLOSS PIVOT DEPLOY TESTS\JAN 04 2011\REAL A-10\A10_files\images\carex-cephalophora20070602_0045.xml	Carex cephalophora			Carex	taxon	Carex cephalophora	Canada	United States		Alabama			Arkansas			Connecticut	Delaware	Florida	Georgia			Illinois	Indiana	Iowa	Kansas	Kentucky	Louisiana	Maine	Maryland	Massachusetts	Michigan	Minnesota	Mississippi	Missouri		Nebraska		New Hampshire	New Jersey	New Mexico		North Carolina		Ohio	Oklahoma
F:\AUGUST 2010 PIVOT IMAGES\MASTER TMJ\carex-cephalophora20070602_0050.jpg	#425	F:\AUGUST 2010 PIVOT IMAGES\MASTER TMJ\carex-cephalophora20070602_0050.jpg	2010-08-02 17:11:43	C:\January 2011 GLOSS PIVOT DEPLOY TESTS\JAN 04 2011\REAL A-10\A10_files\images\carex-cephalophora20070602_0050.xml	Carex cephalophora			Carex	taxon	Carex cephalophora	Canada	United States		Alabama			Arkansas			Connecticut	Delaware	Florida	Georgia			Illinois	Indiana	Iowa	Kansas	Kentucky	Louisiana	Maine	Maryland	Massachusetts	Michigan	Minnesota	Mississippi	Missouri		Nebraska		New Hampshire	New Jersey	New Mexico		North Carolina		Ohio	Oklahoma
F:\AUGUST 2010 PIVOT IMAGES\MASTER TMJ\carex-cephalophora20070602_0051.jpg	#426	F:\AUGUST 2010 PIVOT IMAGES\MASTER TMJ\carex-cephalophora20070602_0051.jpg	2010-08-02 17:11:43	C:\January 2011 GLOSS PIVOT DEPLOY TESTS\JAN 04 2011\REAL A-10\A10_files\images\carex-cephalophora20070602_0051.xml	Carex cephalophora			Carex	taxon	Carex cephalophora	Canada	United States		Alabama			Arkansas			Connecticut	Delaware	Florida	Georgia			Illinois	Indiana	Iowa	Kansas	Kentucky	Louisiana	Maine	Maryland	Massachusetts	Michigan	Minnesota	Mississippi	Missouri		Nebraska		New Hampshire	New Jersey	New Mexico		North Carolina		Ohio	Oklahoma
F:\AUGUST 2010 PIVOT IMAGES\MASTER TMJ\carex-cephalophora20070610_0062.JPG	#427	F:\AUGUST 2010 PIVOT IMAGES\MASTER TMJ\carex-cephalophora20070610_0062.JPG	2010-08-02 17:11:43	C:\January 2011 GLOSS PIVOT DEPLOY TESTS\JAN 04 2011\REAL A-10\A10_files\images\carex-cephalophora20070610_0062.xml	Carex cephalophora			Carex	taxon	Carex cephalophora	Canada	United States		Alabama			Arkansas			Connecticut	Delaware	Florida	Georgia			Illinois	Indiana	Iowa	Kansas	Kentucky	Louisiana	Maine	Maryland	Massachusetts	Michigan	Minnesota	Mississippi	Missouri		Nebraska		New Hampshire	New Jersey	New Mexico		North Carolina		Ohio	Oklahoma
F:\AUGUST 2010 PIVOT IMAGES\MASTER TMJ\carex-cherokeensis-habit-(2).jpg	#428	F:\AUGUST 2010 PIVOT IMAGES\MASTER TMJ\carex-cherokeensis-habit-(2).jpg	2010-08-02 17:11:43	C:\January 2011 GLOSS PIVOT DEPLOY TESTS\JAN 04 2011\REAL A-10\A10_files\images\carex-cherokeensis-habit-(2).xml	Carex cherokeensis			Carex	taxon	Carex cherokeensis		United States		Alabama			Arkansas					Florida	Georgia							Kentucky	Louisiana						Mississippi	Missouri								North Carolina			Oklahoma
F:\AUGUST 2010 PIVOT IMAGES\MASTER TMJ\carex-cherokeensis-habit-3.jpg	#429	F:\AUGUST 2010 PIVOT IMAGES\MASTER TMJ\carex-cherokeensis-habit-3.jpg	2010-08-02 17:11:43	C:\January 2011 GLOSS PIVOT DEPLOY TESTS\JAN 04 2011\REAL A-10\A10_files\images\carex-cherokeensis-habit-3.xml	Carex cherokeensis			Carex	taxon	Carex cherokeensis		United States		Alabama			Arkansas					Florida	Georgia							Kentucky	Louisiana						Mississippi	Missouri								North Carolina			Oklahoma
F:\AUGUST 2010 PIVOT IMAGES\MASTER TMJ\carex-cherokeensis-habit-4.jpg	#430	F:\AUGUST 2010 PIVOT IMAGES\MASTER TMJ\carex-cherokeensis-habit-4.jpg	2010-08-02 17:11:43	C:\January 2011 GLOSS PIVOT DEPLOY TESTS\JAN 04 2011\REAL A-10\A10_files\images\carex-cherokeensis-habit-4.xml	Carex cherokeensis			Carex	taxon	Carex cherokeensis		United States		Alabama			Arkansas					Florida	Georgia							Kentucky	Louisiana						Mississippi	Missouri								North Carolina			Oklahoma
F:\AUGUST 2010 PIVOT IMAGES\MASTER TMJ\carex-cherokeensis-habit-5.jpg	#431	F:\AUGUST 2010 PIVOT IMAGES\MASTER TMJ\carex-cherokeensis-habit-5.jpg	2010-08-02 17:11:43	C:\January 2011 GLOSS PIVOT DEPLOY TESTS\JAN 04 2011\REAL A-10\A10_files\images\carex-cherokeensis-habit-5.xml	Carex cherokeensis			Carex	taxon	Carex cherokeensis		United States		Alabama			Arkansas					Florida	Georgia							Kentucky	Louisiana						Mississippi	Missouri								North Carolina			Oklahoma
F:\AUGUST 2010 PIVOT IMAGES\MASTER TMJ\carex-cherokeensis-habit-7.jpg	#432	F:\AUGUST 2010 PIVOT IMAGES\MASTER TMJ\carex-cherokeensis-habit-7.jpg	2010-08-02 17:11:43	C:\January 2011 GLOSS PIVOT DEPLOY TESTS\JAN 04 2011\REAL A-10\A10_files\images\carex-cherokeensis-habit-7.xml	Carex cherokeensis			Carex	taxon	Carex cherokeensis		United States		Alabama			Arkansas					Florida	Georgia							Kentucky	Louisiana						Mississippi	Missouri								North Carolina			Oklahoma
F:\AUGUST 2010 PIVOT IMAGES\MASTER TMJ\carex-cherokeensis-habit-8.jpg	#433	F:\AUGUST 2010 PIVOT IMAGES\MASTER TMJ\carex-cherokeensis-habit-8.jpg	2010-08-02 17:11:43	C:\January 2011 GLOSS PIVOT DEPLOY TESTS\JAN 04 2011\REAL A-10\A10_files\images\carex-cherokeensis-habit-8.xml	Carex cherokeensis			Carex	taxon	Carex cherokeensis		United States		Alabama			Arkansas					Florida	Georgia							Kentucky	Louisiana						Mississippi	Missouri								North Carolina			Oklahoma
F:\AUGUST 2010 PIVOT IMAGES\MASTER TMJ\carex-cherokeensis-habitat-1.jpg	#434	F:\AUGUST 2010 PIVOT IMAGES\MASTER TMJ\carex-cherokeensis-habitat-1.jpg	2010-08-02 17:11:43	C:\January 2011 GLOSS PIVOT DEPLOY TESTS\JAN 04 2011\REAL A-10\A10_files\images\carex-cherokeensis-habitat-1.xml	Carex cherokeensis			Carex	taxon	Carex cherokeensis		United States		Alabama			Arkansas					Florida	Georgia							Kentucky	Louisiana						Mississippi	Missouri								North Carolina			Oklahoma
F:\AUGUST 2010 PIVOT IMAGES\MASTER TMJ\carex-cherokeensis-habit-rhizomatous.jpg	#435	F:\AUGUST 2010 PIVOT IMAGES\MASTER TMJ\carex-cherokeensis-habit-rhizomatous.jpg	2010-08-02 17:11:43	C:\January 2011 GLOSS PIVOT DEPLOY TESTS\JAN 04 2011\REAL A-10\A10_files\images\carex-cherokeensis-habit-rhizomatous.xml	Carex cherokeensis			Carex	taxon	Carex cherokeensis		United States		Alabama			Arkansas					Florida	Georgia							Kentucky	Louisiana						Mississippi	Missouri								North Carolina			Oklahoma
F:\AUGUST 2010 PIVOT IMAGES\MASTER TMJ\carex-cherokeensis-lateral-spike-anthesis.jpg	#436	F:\AUGUST 2010 PIVOT IMAGES\MASTER TMJ\carex-cherokeensis-lateral-spike-anthesis.jpg	2010-08-02 17:11:43	C:\January 2011 GLOSS PIVOT DEPLOY TESTS\JAN 04 2011\REAL A-10\A10_files\images\carex-cherokeensis-lateral-spike-anthesis.xml	Carex cherokeensis			Carex	taxon	Carex cherokeensis		United States		Alabama			Arkansas					Florida	Georgia							Kentucky	Louisiana						Mississippi	Missouri								North Carolina			Oklahoma
F:\AUGUST 2010 PIVOT IMAGES\MASTER TMJ\carex-cherokeensis-lateral-spikes.jpg	#437	F:\AUGUST 2010 PIVOT IMAGES\MASTER TMJ\carex-cherokeensis-lateral-spikes.jpg	2010-08-02 17:11:43	C:\January 2011 GLOSS PIVOT DEPLOY TESTS\JAN 04 2011\REAL A-10\A10_files\images\carex-cherokeensis-lateral-spikes.xml	Carex cherokeensis			Carex	taxon	Carex cherokeensis		United States		Alabama			Arkansas					Florida	Georgia							Kentucky	Louisiana						Mississippi	Missouri								North Carolina			Oklahoma
F:\AUGUST 2010 PIVOT IMAGES\MASTER TMJ\carex-cherokeensis-terminal-staminate-spike.jpg	#438	F:\AUGUST 2010 PIVOT IMAGES\MASTER TMJ\carex-cherokeensis-terminal-staminate-spike.jpg	2010-08-02 17:11:43	C:\January 2011 GLOSS PIVOT DEPLOY TESTS\JAN 04 2011\REAL A-10\A10_files\images\carex-cherokeensis-terminal-staminate-spike.xml	Carex cherokeensis			Carex	taxon	Carex cherokeensis		United States		Alabama			Arkansas					Florida	Georgia							Kentucky	Louisiana						Mississippi	Missouri								North Carolina			Oklahoma
F:\AUGUST 2010 PIVOT IMAGES\MASTER TMJ\carex-communis20070607_0070.JPG	#439	F:\AUGUST 2010 PIVOT IMAGES\MASTER TMJ\carex-communis20070607_0070.JPG	2010-08-02 17:11:43	C:\January 2011 GLOSS PIVOT DEPLOY TESTS\JAN 04 2011\REAL A-10\A10_files\images\carex-communis20070607_0070.xml	Carex communis			Carex	taxon	Carex communis	Canada	United States		Alabama			Arkansas			Connecticut	Delaware		Georgia			Illinois	Indiana	Iowa		Kentucky		Maine	Maryland	Massachusetts	Michigan	Minnesota	Mississippi	Missouri				New Hampshire	New Jersey	New Mexico		North Carolina		Ohio	Oklahoma
F:\AUGUST 2010 PIVOT IMAGES\MASTER TMJ\carex-communis20070607_0072.JPG	#440	F:\AUGUST 2010 PIVOT IMAGES\MASTER TMJ\carex-communis20070607_0072.JPG	2010-08-02 17:11:43	C:\January 2011 GLOSS PIVOT DEPLOY TESTS\JAN 04 2011\REAL A-10\A10_files\images\carex-communis20070607_0072.xml	Carex communis			Carex	taxon	Carex communis	Canada	United States		Alabama			Arkansas			Connecticut	Delaware		Georgia			Illinois	Indiana	Iowa		Kentucky		Maine	Maryland	Massachusetts	Michigan	Minnesota	Mississippi	Missouri				New Hampshire	New Jersey	New Mexico		North Carolina		Ohio	Oklahoma
F:\AUGUST 2010 PIVOT IMAGES\MASTER TMJ\carex-communis20070607_0075.JPG	#441	F:\AUGUST 2010 PIVOT IMAGES\MASTER TMJ\carex-communis20070607_0075.JPG	2010-08-04 12:57:19	C:\January 2011 GLOSS PIVOT DEPLOY TESTS\JAN 04 2011\REAL A-10\A10_files\images\carex-communis20070607_0075.xml	Carex communis			Carex	taxon	Carex communis	Canada	United States		Alabama			Arkansas			Connecticut	Delaware		Georgia			Illinois	Indiana	Iowa		Kentucky		Maine	Maryland	Massachusetts	Michigan	Minnesota	Mississippi	Missouri				New Hampshire	New Jersey	New Mexico		North Carolina		Ohio	Oklahoma
F:\AUGUST 2010 PIVOT IMAGES\MASTER TMJ\carex-communis20070607_0078.JPG	#442	F:\AUGUST 2010 PIVOT IMAGES\MASTER TMJ\carex-communis20070607_0078.JPG	2010-08-02 17:11:43	C:\January 2011 GLOSS PIVOT DEPLOY TESTS\JAN 04 2011\REAL A-10\A10_files\images\carex-communis20070607_0078.xml	Carex communis			Carex	taxon	Carex communis	Canada	United States		Alabama			Arkansas			Connecticut	Delaware		Georgia			Illinois	Indiana	Iowa		Kentucky		Maine	Maryland	Massachusetts	Michigan	Minnesota	Mississippi	Missouri				New Hampshire	New Jersey	New Mexico		North Carolina		Ohio	Oklahoma
F:\AUGUST 2010 PIVOT IMAGES\MASTER TMJ\carex-communis20070607_0088.JPG	#443	F:\AUGUST 2010 PIVOT IMAGES\MASTER TMJ\carex-communis20070607_0088.JPG	2010-08-04 12:57:19	C:\January 2011 GLOSS PIVOT DEPLOY TESTS\JAN 04 2011\REAL A-10\A10_files\images\carex-communis20070607_0088.xml	Carex communis			Carex	taxon	Carex communis	Canada	United States		Alabama			Arkansas			Connecticut	Delaware		Georgia			Illinois	Indiana	Iowa		Kentucky		Maine	Maryland	Massachusetts	Michigan	Minnesota	Mississippi	Missouri				New Hampshire	New Jersey	New Mexico		North Carolina		Ohio	Oklahoma
F:\AUGUST 2010 PIVOT IMAGES\MASTER TMJ\carex-comosa20040723_0098.JPG	#444	F:\AUGUST 2010 PIVOT IMAGES\MASTER TMJ\carex-comosa20040723_0098.JPG	2010-08-02 17:11:43	C:\January 2011 GLOSS PIVOT DEPLOY TESTS\JAN 04 2011\REAL A-10\A10_files\images\carex-comosa20040723_0098.xml	Carex comosa			Carex	taxon	Carex comosa	Canada	United States	Mexico	Alabama			Arkansas	California		Connecticut	Delaware	Florida	Georgia		Idaho	Illinois	Indiana	Iowa		Kentucky	Louisiana	Maine	Maryland	Massachusetts	Michigan	Minnesota	Mississippi	Missouri	Montana	Nebraska		New Hampshire	New Jersey		New York	North Carolina		Ohio
F:\AUGUST 2010 PIVOT IMAGES\MASTER TMJ\carex-comosa20040723_0099.JPG	#445	F:\AUGUST 2010 PIVOT IMAGES\MASTER TMJ\carex-comosa20040723_0099.JPG	2010-08-02 17:11:43	C:\January 2011 GLOSS PIVOT DEPLOY TESTS\JAN 04 2011\REAL A-10\A10_files\images\carex-comosa20040723_0099.xml	Carex comosa			Carex	taxon	Carex comosa	Canada	United States	Mexico	Alabama			Arkansas	California		Connecticut	Delaware	Florida	Georgia		Idaho	Illinois	Indiana	Iowa		Kentucky	Louisiana	Maine	Maryland	Massachusetts	Michigan	Minnesota	Mississippi	Missouri	Montana	Nebraska		New Hampshire	New Jersey		New York	North Carolina		Ohio
F:\AUGUST 2010 PIVOT IMAGES\MASTER TMJ\carex-comosa20040915_0093.JPG	#446	F:\AUGUST 2010 PIVOT IMAGES\MASTER TMJ\carex-comosa20040915_0093.JPG	2010-08-02 17:11:43	C:\January 2011 GLOSS PIVOT DEPLOY TESTS\JAN 04 2011\REAL A-10\A10_files\images\carex-comosa20040915_0093.xml	Carex comosa			Carex	taxon	Carex comosa	Canada	United States	Mexico	Alabama			Arkansas	California		Connecticut	Delaware	Florida	Georgia		Idaho	Illinois	Indiana	Iowa		Kentucky	Louisiana	Maine	Maryland	Massachusetts	Michigan	Minnesota	Mississippi	Missouri	Montana	Nebraska		New Hampshire	New Jersey		New York	North Carolina		Ohio
F:\AUGUST 2010 PIVOT IMAGES\MASTER TMJ\carex-comosa20040915_0094.JPG	#447	F:\AUGUST 2010 PIVOT IMAGES\MASTER TMJ\carex-comosa20040915_0094.JPG	2010-08-02 17:11:43	C:\January 2011 GLOSS PIVOT DEPLOY TESTS\JAN 04 2011\REAL A-10\A10_files\images\carex-comosa20040915_0094.xml	Carex comosa			Carex	taxon	Carex comosa	Canada	United States	Mexico	Alabama			Arkansas	California		Connecticut	Delaware	Florida	Georgia		Idaho	Illinois	Indiana	Iowa		Kentucky	Louisiana	Maine	Maryland	Massachusetts	Michigan	Minnesota	Mississippi	Missouri	Montana	Nebraska		New Hampshire	New Jersey		New York	North Carolina		Ohio
F:\AUGUST 2010 PIVOT IMAGES\MASTER TMJ\carex-comosa20070531_0090.JPG	#448	F:\AUGUST 2010 PIVOT IMAGES\MASTER TMJ\carex-comosa20070531_0090.JPG	2010-08-02 17:11:43	C:\January 2011 GLOSS PIVOT DEPLOY TESTS\JAN 04 2011\REAL A-10\A10_files\images\carex-comosa20070531_0090.xml	Carex comosa			Carex	taxon	Carex comosa	Canada	United States	Mexico	Alabama			Arkansas	California		Connecticut	Delaware	Florida	Georgia		Idaho	Illinois	Indiana	Iowa		Kentucky	Louisiana	Maine	Maryland	Massachusetts	Michigan	Minnesota	Mississippi	Missouri	Montana	Nebraska		New Hampshire	New Jersey		New York	North Carolina		Ohio
F:\AUGUST 2010 PIVOT IMAGES\MASTER TMJ\carex-comosa20070531_0091.JPG	#449	F:\AUGUST 2010 PIVOT IMAGES\MASTER TMJ\carex-comosa20070531_0091.JPG	2010-08-02 17:11:43	C:\January 2011 GLOSS PIVOT DEPLOY TESTS\JAN 04 2011\REAL A-10\A10_files\images\carex-comosa20070531_0091.xml	Carex comosa			Carex	taxon	Carex comosa	Canada	United States	Mexico	Alabama			Arkansas	California		Connecticut	Delaware	Florida	Georgia		Idaho	Illinois	Indiana	Iowa		Kentucky	Louisiana	Maine	Maryland	Massachusetts	Michigan	Minnesota	Mississippi	Missouri	Montana	Nebraska		New Hampshire	New Jersey		New York	North Carolina		Ohio
F:\AUGUST 2010 PIVOT IMAGES\MASTER TMJ\carex-comosa-inflorescence.JPG	#450	F:\AUGUST 2010 PIVOT IMAGES\MASTER TMJ\carex-comosa-inflorescence.JPG	2010-08-02 17:11:43	C:\January 2011 GLOSS PIVOT DEPLOY TESTS\JAN 04 2011\REAL A-10\A10_files\images\carex-comosa-inflorescence.xml	Carex comosa			Carex	taxon	Carex comosa	Canada	United States	Mexico	Alabama			Arkansas	California		Connecticut	Delaware	Florida	Georgia		Idaho	Illinois	Indiana	Iowa		Kentucky	Louisiana	Maine	Maryland	Massachusetts	Michigan	Minnesota	Mississippi	Missouri	Montana	Nebraska		New Hampshire	New Jersey		New York	North Carolina		Ohio
F:\AUGUST 2010 PIVOT IMAGES\MASTER TMJ\carex-complanata-anthesis.jpg	#451	F:\AUGUST 2010 PIVOT IMAGES\MASTER TMJ\carex-complanata-anthesis.jpg	2010-08-02 17:11:44	C:\January 2011 GLOSS PIVOT DEPLOY TESTS\JAN 04 2011\REAL A-10\A10_files\images\carex-complanata-anthesis.xml	Carex complanata			Carex	taxon	Carex complanata		United States	Mexico	Alabama			Arkansas				Delaware	Florida	Georgia					Iowa			Louisiana		Maryland				Mississippi	Missouri					New Jersey			North Carolina
F:\AUGUST 2010 PIVOT IMAGES\MASTER TMJ\carex-complanata-maturity.jpg	#452	F:\AUGUST 2010 PIVOT IMAGES\MASTER TMJ\carex-complanata-maturity.jpg	2010-08-02 17:11:44	C:\January 2011 GLOSS PIVOT DEPLOY TESTS\JAN 04 2011\REAL A-10\A10_files\images\carex-complanata-maturity.xml	Carex complanata			Carex	taxon	Carex complanata		United States	Mexico	Alabama			Arkansas				Delaware	Florida	Georgia					Iowa			Louisiana		Maryland				Mississippi	Missouri					New Jersey			North Carolina
F:\AUGUST 2010 PIVOT IMAGES\MASTER TMJ\carex-conoidea-anthesis.jpg	#453	F:\AUGUST 2010 PIVOT IMAGES\MASTER TMJ\carex-conoidea-anthesis.jpg	2010-08-02 17:11:43	C:\January 2011 GLOSS PIVOT DEPLOY TESTS\JAN 04 2011\REAL A-10\A10_files\images\carex-conoidea-anthesis.xml	Carex conoidea			Carex	taxon	Carex conoidea	Canada	United States				Arizona				Connecticut	Delaware					Illinois	Indiana	Iowa				Maine		Massachusetts	Michigan	Minnesota		Missouri				New Hampshire	New Jersey		New York	North Carolina		Ohio
F:\AUGUST 2010 PIVOT IMAGES\MASTER TMJ\carex-conoidea-habit.jpg	#454	F:\AUGUST 2010 PIVOT IMAGES\MASTER TMJ\carex-conoidea-habit.jpg	2010-08-02 17:11:43	C:\January 2011 GLOSS PIVOT DEPLOY TESTS\JAN 04 2011\REAL A-10\A10_files\images\carex-conoidea-habit.xml	Carex conoidea			Carex	taxon	Carex conoidea	Canada	United States				Arizona				Connecticut	Delaware					Illinois	Indiana	Iowa				Maine		Massachusetts	Michigan	Minnesota		Missouri				New Hampshire	New Jersey		New York	North Carolina		Ohio
F:\AUGUST 2010 PIVOT IMAGES\MASTER TMJ\carex-conoidea-HDR.jpg	#455	F:\AUGUST 2010 PIVOT IMAGES\MASTER TMJ\carex-conoidea-HDR.jpg	2010-08-02 17:11:43	C:\January 2011 GLOSS PIVOT DEPLOY TESTS\JAN 04 2011\REAL A-10\A10_files\images\carex-conoidea-HDR.xml	Carex conoidea			Carex	taxon	Carex conoidea	Canada	United States				Arizona				Connecticut	Delaware					Illinois	Indiana	Iowa				Maine		Massachusetts	Michigan	Minnesota		Missouri				New Hampshire	New Jersey		New York	North Carolina		Ohio
F:\AUGUST 2010 PIVOT IMAGES\MASTER TMJ\carex-conoidea-infloresence.jpg	#456	F:\AUGUST 2010 PIVOT IMAGES\MASTER TMJ\carex-conoidea-infloresence.jpg	2010-08-02 17:11:43	C:\January 2011 GLOSS PIVOT DEPLOY TESTS\JAN 04 2011\REAL A-10\A10_files\images\carex-conoidea-infloresence.xml	Carex conoidea			Carex	taxon	Carex conoidea	Canada	United States				Arizona				Connecticut	Delaware					Illinois	Indiana	Iowa				Maine		Massachusetts	Michigan	Minnesota		Missouri				New Hampshire	New Jersey		New York	North Carolina		Ohio
F:\AUGUST 2010 PIVOT IMAGES\MASTER TMJ\carex-conoidea-lateral-pistillate-spike.jpg	#457	F:\AUGUST 2010 PIVOT IMAGES\MASTER TMJ\carex-conoidea-lateral-pistillate-spike.jpg	2010-08-02 17:11:43	C:\January 2011 GLOSS PIVOT DEPLOY TESTS\JAN 04 2011\REAL A-10\A10_files\images\carex-conoidea-lateral-pistillate-spike.xml	Carex conoidea			Carex	taxon	Carex conoidea	Canada	United States				Arizona				Connecticut	Delaware					Illinois	Indiana	Iowa				Maine		Massachusetts	Michigan	Minnesota		Missouri				New Hampshire	New Jersey		New York	North Carolina		Ohio
F:\AUGUST 2010 PIVOT IMAGES\MASTER TMJ\carex-crinata 20070502_0107.JPG	#458	F:\AUGUST 2010 PIVOT IMAGES\MASTER TMJ\carex-crinata 20070502_0107.JPG	2010-08-02 17:11:42	C:\January 2011 GLOSS PIVOT DEPLOY TESTS\JAN 04 2011\REAL A-10\A10_files\images\carex-crinata20070502_0107.xml	Carex crinita			Carex	taxon	Carex crinita		United States		Alabama			Arkansas			Connecticut	Delaware		Georgia							Kentucky	Louisiana		Maryland	Massachusetts			Mississippi	Missouri		Nebraska			New Jersey		New York	North Carolina		Ohio	Oklahoma
F:\AUGUST 2010 PIVOT IMAGES\MASTER TMJ\carex-crinata 20070502_0109.JPG	#459	F:\AUGUST 2010 PIVOT IMAGES\MASTER TMJ\carex-crinata 20070502_0109.JPG	2010-08-02 17:11:42	C:\January 2011 GLOSS PIVOT DEPLOY TESTS\JAN 04 2011\REAL A-10\A10_files\images\carex-crinata20070502_0109.xml	Carex crinita			Carex	taxon	Carex crinita		United States		Alabama			Arkansas			Connecticut	Delaware		Georgia							Kentucky	Louisiana		Maryland	Massachusetts			Mississippi	Missouri		Nebraska			New Jersey		New York	North Carolina		Ohio	Oklahoma
F:\AUGUST 2010 PIVOT IMAGES\MASTER TMJ\carex-crinata 20070811_0101.JPG	#460	F:\AUGUST 2010 PIVOT IMAGES\MASTER TMJ\carex-crinata 20070811_0101.JPG	2010-08-02 17:11:42	C:\January 2011 GLOSS PIVOT DEPLOY TESTS\JAN 04 2011\REAL A-10\A10_files\images\carex-crinata20070811_0101.xml	Carex crinita			Carex	taxon	Carex crinita		United States		Alabama			Arkansas			Connecticut	Delaware		Georgia							Kentucky	Louisiana		Maryland	Massachusetts			Mississippi	Missouri		Nebraska			New Jersey		New York	North Carolina		Ohio	Oklahoma
F:\AUGUST 2010 PIVOT IMAGES\MASTER TMJ\carex-crinata 20070811_0103.JPG	#461	F:\AUGUST 2010 PIVOT IMAGES\MASTER TMJ\carex-crinata 20070811_0103.JPG	2010-08-02 17:11:42	C:\January 2011 GLOSS PIVOT DEPLOY TESTS\JAN 04 2011\REAL A-10\A10_files\images\carex-crinata20070811_0103.xml	Carex crinita			Carex	taxon	Carex crinita		United States		Alabama			Arkansas			Connecticut	Delaware		Georgia							Kentucky	Louisiana		Maryland	Massachusetts			Mississippi	Missouri		Nebraska			New Jersey		New York	North Carolina		Ohio	Oklahoma
F:\AUGUST 2010 PIVOT IMAGES\MASTER TMJ\carex-crinata-lateral-spike.JPG	#462	F:\AUGUST 2010 PIVOT IMAGES\MASTER TMJ\carex-crinata-lateral-spike.JPG	2010-08-02 17:11:42	C:\January 2011 GLOSS PIVOT DEPLOY TESTS\JAN 04 2011\REAL A-10\A10_files\images\carex-crinata-lateral-spike.xml	Carex crinita			Carex	taxon	Carex crinita		United States		Alabama			Arkansas			Connecticut	Delaware		Georgia							Kentucky	Louisiana		Maryland	Massachusetts			Mississippi	Missouri		Nebraska			New Jersey		New York	North Carolina		Ohio	Oklahoma
F:\AUGUST 2010 PIVOT IMAGES\MASTER TMJ\carex-crinita-habit.jpg	#463	F:\AUGUST 2010 PIVOT IMAGES\MASTER TMJ\carex-crinita-habit.jpg	2010-08-02 17:11:41	C:\January 2011 GLOSS PIVOT DEPLOY TESTS\JAN 04 2011\REAL A-10\A10_files\images\carex-crinita-habit.xml	Carex crinita			Carex	taxon	Carex crinita		United States		Alabama			Arkansas			Connecticut	Delaware		Georgia							Kentucky	Louisiana		Maryland	Massachusetts			Mississippi	Missouri		Nebraska			New Jersey		New York	North Carolina		Ohio	Oklahoma
F:\AUGUST 2010 PIVOT IMAGES\MASTER TMJ\carex-crinita-inflorescence.jpg	#464	F:\AUGUST 2010 PIVOT IMAGES\MASTER TMJ\carex-crinita-inflorescence.jpg	2010-08-02 17:11:39	C:\January 2011 GLOSS PIVOT DEPLOY TESTS\JAN 04 2011\REAL A-10\A10_files\images\carex-crinita-inflorescence.xml	Carex crinita			Carex	taxon	Carex crinita		United States		Alabama			Arkansas			Connecticut	Delaware		Georgia							Kentucky	Louisiana		Maryland	Massachusetts			Mississippi	Missouri		Nebraska			New Jersey		New York	North Carolina		Ohio	Oklahoma
F:\AUGUST 2010 PIVOT IMAGES\MASTER TMJ\carex-crinita-inflorescence-2.jpg	#465	F:\AUGUST 2010 PIVOT IMAGES\MASTER TMJ\carex-crinita-inflorescence-2.jpg	2010-08-02 17:11:40	C:\January 2011 GLOSS PIVOT DEPLOY TESTS\JAN 04 2011\REAL A-10\A10_files\images\carex-crinita-inflorescence-2.xml	Carex crinita			Carex	taxon	Carex crinita		United States		Alabama			Arkansas			Connecticut	Delaware		Georgia							Kentucky	Louisiana		Maryland	Massachusetts			Mississippi	Missouri		Nebraska			New Jersey		New York	North Carolina		Ohio	Oklahoma
F:\AUGUST 2010 PIVOT IMAGES\MASTER TMJ\carex-cristatella-inflorescence.jpg	#466	F:\AUGUST 2010 PIVOT IMAGES\MASTER TMJ\carex-cristatella-inflorescence.jpg	2010-08-02 17:11:38	C:\January 2011 GLOSS PIVOT DEPLOY TESTS\JAN 04 2011\REAL A-10\A10_files\images\carex-cristatella-inflorescence.xml	Carex cristatella			Carex	taxon	Carex cristatella	Canada	United States								Connecticut	Delaware					Illinois	Indiana	Iowa	Kansas	Kentucky			Maryland	Massachusetts	Michigan	Minnesota		Missouri		Nebraska		New Hampshire	New Jersey		New York	North Carolina		Ohio
F:\AUGUST 2010 PIVOT IMAGES\MASTER TMJ\carex-cristatella-inflorescence-3.jpg	#467	F:\AUGUST 2010 PIVOT IMAGES\MASTER TMJ\carex-cristatella-inflorescence-3.jpg	2010-08-02 17:11:38	C:\January 2011 GLOSS PIVOT DEPLOY TESTS\JAN 04 2011\REAL A-10\A10_files\images\carex-cristatella-inflorescence-3.xml	Carex cristatella			Carex	taxon	Carex cristatella	Canada	United States								Connecticut	Delaware					Illinois	Indiana	Iowa	Kansas	Kentucky			Maryland	Massachusetts	Michigan	Minnesota		Missouri		Nebraska		New Hampshire	New Jersey		New York	North Carolina		Ohio
F:\AUGUST 2010 PIVOT IMAGES\MASTER TMJ\carex-crus-corvi-inflorescence2.jpg	#468	F:\AUGUST 2010 PIVOT IMAGES\MASTER TMJ\carex-crus-corvi-inflorescence2.jpg	2010-08-02 17:11:38	C:\January 2011 GLOSS PIVOT DEPLOY TESTS\JAN 04 2011\REAL A-10\A10_files\images\carex-crus-corvi-inflorescence2.xml	Carex crus-corvi			Carex	taxon	Carex crus-corvi	Canada	United States		Alabama			Arkansas					Florida	Georgia			Illinois	Indiana	Iowa	Kansas	Kentucky	Louisiana				Michigan	Minnesota		Missouri		Nebraska						North Carolina		Ohio	Oklahoma
F:\AUGUST 2010 PIVOT IMAGES\MASTER TMJ\carex-davisii-lateral-spikes.jpg	#469	F:\AUGUST 2010 PIVOT IMAGES\MASTER TMJ\carex-davisii-lateral-spikes.jpg	2010-08-02 17:11:38	C:\January 2011 GLOSS PIVOT DEPLOY TESTS\JAN 04 2011\REAL A-10\A10_files\images\carex-davisii-lateral-spikes.xml	Carex davisii			Carex	taxon	Carex davisii	Canada	United States					Arkansas			Connecticut	Delaware					Illinois	Indiana	Iowa	Kansas	Kentucky			Maryland	Massachusetts	Michigan	Minnesota		Missouri		Nebraska			New Jersey		New York			Ohio	Oklahoma
F:\AUGUST 2010 PIVOT IMAGES\MASTER TMJ\carex-davisii-terminal-spike-gynecandrous.jpg	#470	F:\AUGUST 2010 PIVOT IMAGES\MASTER TMJ\carex-davisii-terminal-spike-gynecandrous.jpg	2010-08-02 17:11:38	C:\January 2011 GLOSS PIVOT DEPLOY TESTS\JAN 04 2011\REAL A-10\A10_files\images\carex-davisii-terminal-spike-gynecandrous.xml	Carex davisii			Carex	taxon	Carex davisii	Canada	United States					Arkansas			Connecticut	Delaware					Illinois	Indiana	Iowa	Kansas	Kentucky			Maryland	Massachusetts	Michigan	Minnesota		Missouri		Nebraska			New Jersey		New York			Ohio	Oklahoma
F:\AUGUST 2010 PIVOT IMAGES\MASTER TMJ\carex-davisii-terminal-spike-gynecandrous2.jpg	#471	F:\AUGUST 2010 PIVOT IMAGES\MASTER TMJ\carex-davisii-terminal-spike-gynecandrous2.jpg	2010-08-02 17:11:38	C:\January 2011 GLOSS PIVOT DEPLOY TESTS\JAN 04 2011\REAL A-10\A10_files\images\carex-davisii-terminal-spike-gynecandrous2.xml	Carex davisii			Carex	taxon	Carex davisii	Canada	United States					Arkansas			Connecticut	Delaware					Illinois	Indiana	Iowa	Kansas	Kentucky			Maryland	Massachusetts	Michigan	Minnesota		Missouri		Nebraska			New Jersey		New York			Ohio	Oklahoma
F:\AUGUST 2010 PIVOT IMAGES\MASTER TMJ\carex-debilis-habit.jpg	#472	F:\AUGUST 2010 PIVOT IMAGES\MASTER TMJ\carex-debilis-habit.jpg	2010-08-02 17:11:38	C:\January 2011 GLOSS PIVOT DEPLOY TESTS\JAN 04 2011\REAL A-10\A10_files\images\carex-debilis-habit.xml	Carex debilis			Carex	taxon	Carex debilis	Canada	United States		Alabama			Arkansas			Connecticut	Delaware	Florida	Georgia			Illinois	Indiana			Kentucky	Louisiana	Maine	Maryland	Massachusetts	Michigan	Minnesota	Mississippi	Missouri				New Hampshire	New Jersey		New York	North Carolina		Ohio	Oklahoma
F:\AUGUST 2010 PIVOT IMAGES\MASTER TMJ\carex-debilis-habit-1.jpg	#473	F:\AUGUST 2010 PIVOT IMAGES\MASTER TMJ\carex-debilis-habit-1.jpg	2010-08-02 17:11:38	C:\January 2011 GLOSS PIVOT DEPLOY TESTS\JAN 04 2011\REAL A-10\A10_files\images\carex-debilis-habit-1.xml	Carex debilis			Carex	taxon	Carex debilis	Canada	United States		Alabama			Arkansas			Connecticut	Delaware	Florida	Georgia			Illinois	Indiana			Kentucky	Louisiana	Maine	Maryland	Massachusetts	Michigan	Minnesota	Mississippi	Missouri				New Hampshire	New Jersey		New York	North Carolina		Ohio	Oklahoma
F:\AUGUST 2010 PIVOT IMAGES\MASTER TMJ\carex-eburnea-habit.jpg	#474	F:\AUGUST 2010 PIVOT IMAGES\MASTER TMJ\carex-eburnea-habit.jpg	2010-08-02 17:11:38	C:\January 2011 GLOSS PIVOT DEPLOY TESTS\JAN 04 2011\REAL A-10\A10_files\images\carex-eburnea-habit.xml	Carex eburnea	http://photosynth.net/view.aspx?cid=4f2a49f4-c127-4af2-8dcd-79074bbf2ec8		Carex	taxon	Carex eburnea	Canada	United States	Mexico	Alabama	Alaska		Arkansas			Connecticut			Georgia			Illinois	Indiana	Iowa		Kentucky		Maine	Maryland	Massachusetts	Michigan	Minnesota		Missouri	Montana	Nebraska		New Hampshire	New Jersey		New York	North Carolina	North Dakota	Ohio
F:\AUGUST 2010 PIVOT IMAGES\MASTER TMJ\carex-eburnea-inflorescence.jpg	#475	F:\AUGUST 2010 PIVOT IMAGES\MASTER TMJ\carex-eburnea-inflorescence.jpg	2010-08-02 17:11:38	C:\January 2011 GLOSS PIVOT DEPLOY TESTS\JAN 04 2011\REAL A-10\A10_files\images\carex-eburnea-inflorescence.xml	Carex eburnea	http://photosynth.net/view.aspx?cid=4f2a49f4-c127-4af2-8dcd-79074bbf2ec8		Carex	taxon	Carex eburnea	Canada	United States	Mexico	Alabama	Alaska		Arkansas			Connecticut			Georgia			Illinois	Indiana	Iowa		Kentucky		Maine	Maryland	Massachusetts	Michigan	Minnesota		Missouri	Montana	Nebraska		New Hampshire	New Jersey		New York	North Carolina	North Dakota	Ohio
F:\AUGUST 2010 PIVOT IMAGES\MASTER TMJ\carex-eburnea-inflorescence-2.jpg	#476	F:\AUGUST 2010 PIVOT IMAGES\MASTER TMJ\carex-eburnea-inflorescence-2.jpg	2010-08-02 17:11:38	C:\January 2011 GLOSS PIVOT DEPLOY TESTS\JAN 04 2011\REAL A-10\A10_files\images\carex-eburnea-inflorescence-2.xml	Carex eburnea			Carex	taxon	Carex eburnea	Canada	United States	Mexico	Alabama	Alaska		Arkansas			Connecticut			Georgia			Illinois	Indiana	Iowa		Kentucky		Maine	Maryland	Massachusetts	Michigan	Minnesota		Missouri	Montana	Nebraska		New Hampshire	New Jersey		New York	North Carolina	North Dakota	Ohio
F:\AUGUST 2010 PIVOT IMAGES\MASTER TMJ\carex-festucacea-anthesis-HDR.jpg	#477	F:\AUGUST 2010 PIVOT IMAGES\MASTER TMJ\carex-festucacea-anthesis-HDR.jpg	2010-08-02 17:11:38	C:\January 2011 GLOSS PIVOT DEPLOY TESTS\JAN 04 2011\REAL A-10\A10_files\images\carex-festucacea-anthesis-HDR.xml	Carex molesta			Carex	taxon	Carex molesta	Canada	United States		Alabama			Arkansas	California		Connecticut						Illinois	Indiana	Iowa	Kansas	Kentucky			Maryland	Massachusetts	Michigan	Minnesota	Mississippi	Missouri		Nebraska		New Hampshire			New York		North Dakota	Ohio	Oklahoma
F:\AUGUST 2010 PIVOT IMAGES\MASTER TMJ\carex-festucacea-habit.jpg	#478	F:\AUGUST 2010 PIVOT IMAGES\MASTER TMJ\carex-festucacea-habit.jpg	2010-08-02 17:11:38	C:\January 2011 GLOSS PIVOT DEPLOY TESTS\JAN 04 2011\REAL A-10\A10_files\images\carex-festucacea-habit.xml	Carex molesta			Carex	taxon	Carex molesta	Canada	United States		Alabama			Arkansas	California		Connecticut						Illinois	Indiana	Iowa	Kansas	Kentucky			Maryland	Massachusetts	Michigan	Minnesota	Mississippi	Missouri		Nebraska		New Hampshire			New York		North Dakota	Ohio	Oklahoma
F:\AUGUST 2010 PIVOT IMAGES\MASTER TMJ\carex-festucacea-inflorescencejpg.jpg	#479	F:\AUGUST 2010 PIVOT IMAGES\MASTER TMJ\carex-festucacea-inflorescencejpg.jpg	2010-08-02 17:11:38	C:\January 2011 GLOSS PIVOT DEPLOY TESTS\JAN 04 2011\REAL A-10\A10_files\images\carex-festucacea-inflorescencejpg.xml	Carex molesta			Carex	taxon	Carex molesta	Canada	United States		Alabama			Arkansas	California		Connecticut						Illinois	Indiana	Iowa	Kansas	Kentucky			Maryland	Massachusetts	Michigan	Minnesota	Mississippi	Missouri		Nebraska		New Hampshire			New York		North Dakota	Ohio	Oklahoma
F:\AUGUST 2010 PIVOT IMAGES\MASTER TMJ\carex-festucacea-pre-anthesis.jpg	#480	F:\AUGUST 2010 PIVOT IMAGES\MASTER TMJ\carex-festucacea-pre-anthesis.jpg	2010-08-02 17:11:38	C:\January 2011 GLOSS PIVOT DEPLOY TESTS\JAN 04 2011\REAL A-10\A10_files\images\carex-festucacea-pre-anthesis.xml	Carex molesta			Carex	taxon	Carex molesta	Canada	United States		Alabama			Arkansas	California		Connecticut						Illinois	Indiana	Iowa	Kansas	Kentucky			Maryland	Massachusetts	Michigan	Minnesota	Mississippi	Missouri		Nebraska		New Hampshire			New York		North Dakota	Ohio	Oklahoma
F:\AUGUST 2010 PIVOT IMAGES\MASTER TMJ\carex-festucacea-terminal-gynecandrous-spike.jpg	#481	F:\AUGUST 2010 PIVOT IMAGES\MASTER TMJ\carex-festucacea-terminal-gynecandrous-spike.jpg	2010-08-02 17:11:38	C:\January 2011 GLOSS PIVOT DEPLOY TESTS\JAN 04 2011\REAL A-10\A10_files\images\carex-festucacea-terminal-gynecandrous-spike.xml	Carex molesta			Carex	taxon	Carex molesta	Canada	United States		Alabama			Arkansas	California		Connecticut						Illinois	Indiana	Iowa	Kansas	Kentucky			Maryland	Massachusetts	Michigan	Minnesota	Mississippi	Missouri		Nebraska		New Hampshire			New York		North Dakota	Ohio	Oklahoma
F:\AUGUST 2010 PIVOT IMAGES\MASTER TMJ\carex-fissa-habit.jpg	#482	F:\AUGUST 2010 PIVOT IMAGES\MASTER TMJ\carex-fissa-habit.jpg	2010-08-02 17:11:37	C:\January 2011 GLOSS PIVOT DEPLOY TESTS\JAN 04 2011\REAL A-10\A10_files\images\carex-fissa-habit.xml	Carex fissa			Carex	taxon	Carex fissa		United States					Arkansas					Florida	Georgia						Kansas		Louisiana						Mississippi	Missouri											Oklahoma
F:\AUGUST 2010 PIVOT IMAGES\MASTER TMJ\carex-fissa-inflorescence.jpg	#483	F:\AUGUST 2010 PIVOT IMAGES\MASTER TMJ\carex-fissa-inflorescence.jpg	2010-08-02 17:11:37	C:\January 2011 GLOSS PIVOT DEPLOY TESTS\JAN 04 2011\REAL A-10\A10_files\images\carex-fissa-inflorescence.xml	Carex fissa			Carex	taxon	Carex fissa		United States					Arkansas					Florida	Georgia						Kansas		Louisiana						Mississippi	Missouri											Oklahoma
F:\AUGUST 2010 PIVOT IMAGES\MASTER TMJ\carex-fissa-inflorescence-3.jpg	#484	F:\AUGUST 2010 PIVOT IMAGES\MASTER TMJ\carex-fissa-inflorescence-3.jpg	2010-08-02 17:11:37	C:\January 2011 GLOSS PIVOT DEPLOY TESTS\JAN 04 2011\REAL A-10\A10_files\images\carex-fissa-inflorescence-3.xml	Carex fissa			Carex	taxon	Carex fissa		United States					Arkansas					Florida	Georgia						Kansas		Louisiana						Mississippi	Missouri											Oklahoma
F:\AUGUST 2010 PIVOT IMAGES\MASTER TMJ\carex-flaccosperma-inflorescence.jpg	#485	F:\AUGUST 2010 PIVOT IMAGES\MASTER TMJ\carex-flaccosperma-inflorescence.jpg	2010-08-02 17:11:37	C:\January 2011 GLOSS PIVOT DEPLOY TESTS\JAN 04 2011\REAL A-10\A10_files\images\carex-flaccosperma-inflorescence.xml	Carex flaccosperma			Carex	taxon	Carex flaccosperma		United States		Alabama			Arkansas					Florida	Georgia			Illinois			Kansas	Kentucky	Louisiana						Mississippi	Missouri								North Carolina			Oklahoma
F:\AUGUST 2010 PIVOT IMAGES\MASTER TMJ\carex-flaccosperma-inflorescence-2.jpg	#486	F:\AUGUST 2010 PIVOT IMAGES\MASTER TMJ\carex-flaccosperma-inflorescence-2.jpg	2010-08-02 17:11:37	C:\January 2011 GLOSS PIVOT DEPLOY TESTS\JAN 04 2011\REAL A-10\A10_files\images\carex-flaccosperma-inflorescence-2.xml	Carex flaccosperma			Carex	taxon	Carex flaccosperma		United States		Alabama			Arkansas					Florida	Georgia			Illinois			Kansas	Kentucky	Louisiana						Mississippi	Missouri								North Carolina			Oklahoma
F:\AUGUST 2010 PIVOT IMAGES\MASTER TMJ\carex-flaccosperma-maturity.jpg	#487	F:\AUGUST 2010 PIVOT IMAGES\MASTER TMJ\carex-flaccosperma-maturity.jpg	2010-05-18 20:44:11	C:\January 2011 GLOSS PIVOT DEPLOY TESTS\JAN 04 2011\REAL A-10\A10_files\images\carex-flaccosperma-maturity.xml	Carex flaccosperma			Carex	taxon	Carex flaccosperma		United States		Alabama			Arkansas					Florida	Georgia			Illinois			Kansas	Kentucky	Louisiana						Mississippi	Missouri								North Carolina			Oklahoma
F:\AUGUST 2010 PIVOT IMAGES\MASTER TMJ\carex-flaccosperma-maturity-habit.jpg	#488	F:\AUGUST 2010 PIVOT IMAGES\MASTER TMJ\carex-flaccosperma-maturity-habit.jpg	2010-05-18 20:44:34	C:\January 2011 GLOSS PIVOT DEPLOY TESTS\JAN 04 2011\REAL A-10\A10_files\images\carex-flaccosperma-maturity-habit.xml	Carex flaccosperma			Carex	taxon	Carex flaccosperma		United States		Alabama			Arkansas					Florida	Georgia			Illinois			Kansas	Kentucky	Louisiana						Mississippi	Missouri								North Carolina			Oklahoma
F:\AUGUST 2010 PIVOT IMAGES\MASTER TMJ\carex-flava20070825_0117.JPG	#489	F:\AUGUST 2010 PIVOT IMAGES\MASTER TMJ\carex-flava20070825_0117.JPG	2010-08-04 12:57:38	C:\January 2011 GLOSS PIVOT DEPLOY TESTS\JAN 04 2011\REAL A-10\A10_files\images\carex-flava20070825_0117.xml	Carex flava			Carex	taxon	Carex flava	Canada	United States			Alaska					Connecticut					Idaho		Indiana					Maine		Massachusetts	Michigan	Minnesota			Montana			New Hampshire	New Jersey		New York			Ohio
F:\AUGUST 2010 PIVOT IMAGES\MASTER TMJ\carex-flava20070825_0121.JPG	#490	F:\AUGUST 2010 PIVOT IMAGES\MASTER TMJ\carex-flava20070825_0121.JPG	2010-08-02 17:11:37	C:\January 2011 GLOSS PIVOT DEPLOY TESTS\JAN 04 2011\REAL A-10\A10_files\images\carex-flava20070825_0121.xml	Carex flava			Carex	taxon	Carex flava	Canada	United States			Alaska					Connecticut					Idaho		Indiana					Maine		Massachusetts	Michigan	Minnesota			Montana			New Hampshire	New Jersey		New York			Ohio
F:\AUGUST 2010 PIVOT IMAGES\MASTER TMJ\carex-flava-habit.jpg	#491	F:\AUGUST 2010 PIVOT IMAGES\MASTER TMJ\carex-flava-habit.jpg	2010-08-02 17:11:37	C:\January 2011 GLOSS PIVOT DEPLOY TESTS\JAN 04 2011\REAL A-10\A10_files\images\carex-flava-habit.xml	Carex flava			Carex	taxon	Carex flava	Canada	United States			Alaska					Connecticut					Idaho		Indiana					Maine		Massachusetts	Michigan	Minnesota			Montana			New Hampshire	New Jersey		New York			Ohio
F:\AUGUST 2010 PIVOT IMAGES\MASTER TMJ\carex-flava-inflorescence.jpg	#492	F:\AUGUST 2010 PIVOT IMAGES\MASTER TMJ\carex-flava-inflorescence.jpg	2010-08-02 17:11:37	C:\January 2011 GLOSS PIVOT DEPLOY TESTS\JAN 04 2011\REAL A-10\A10_files\images\carex-flava-inflorescence.xml	Carex flava			Carex	taxon	Carex flava	Canada	United States			Alaska					Connecticut					Idaho		Indiana					Maine		Massachusetts	Michigan	Minnesota			Montana			New Hampshire	New Jersey		New York			Ohio
F:\AUGUST 2010 PIVOT IMAGES\MASTER TMJ\carex-flava-inflorescence-mature.jpg	#493	F:\AUGUST 2010 PIVOT IMAGES\MASTER TMJ\carex-flava-inflorescence-mature.jpg	2010-08-02 17:11:37	C:\January 2011 GLOSS PIVOT DEPLOY TESTS\JAN 04 2011\REAL A-10\A10_files\images\carex-flava-inflorescence-mature.xml	Carex flava			Carex	taxon	Carex flava	Canada	United States			Alaska					Connecticut					Idaho		Indiana					Maine		Massachusetts	Michigan	Minnesota			Montana			New Hampshire	New Jersey		New York			Ohio
F:\AUGUST 2010 PIVOT IMAGES\MASTER TMJ\carex-folliculata-dissection-7.jpg	#494	F:\AUGUST 2010 PIVOT IMAGES\MASTER TMJ\carex-folliculata-dissection-7.jpg	2010-08-02 17:11:37	C:\January 2011 GLOSS PIVOT DEPLOY TESTS\JAN 04 2011\REAL A-10\A10_files\images\carex-folliculata-dissection-7.xml	Carex folliculata			Carex	taxon	Carex folliculata	Canada	United States								Connecticut	Delaware		Georgia				Indiana					Maine	Maryland	Massachusetts	Michigan							New Hampshire	New Jersey		New York	North Carolina		Ohio
F:\AUGUST 2010 PIVOT IMAGES\MASTER TMJ\carex-folliculata-habit.jpg	#495	F:\AUGUST 2010 PIVOT IMAGES\MASTER TMJ\carex-folliculata-habit.jpg	2010-08-02 17:11:37	C:\January 2011 GLOSS PIVOT DEPLOY TESTS\JAN 04 2011\REAL A-10\A10_files\images\carex-folliculata-habit.xml	Carex folliculata			Carex	taxon	Carex folliculata	Canada	United States								Connecticut	Delaware		Georgia				Indiana					Maine	Maryland	Massachusetts	Michigan							New Hampshire	New Jersey		New York	North Carolina		Ohio
F:\AUGUST 2010 PIVOT IMAGES\MASTER TMJ\carex-folliculata-habit-10.jpg	#496	F:\AUGUST 2010 PIVOT IMAGES\MASTER TMJ\carex-folliculata-habit-10.jpg	2010-08-02 17:11:37	C:\January 2011 GLOSS PIVOT DEPLOY TESTS\JAN 04 2011\REAL A-10\A10_files\images\carex-folliculata-habit-10.xml	Carex folliculata			Carex	taxon	Carex folliculata	Canada	United States								Connecticut	Delaware		Georgia				Indiana					Maine	Maryland	Massachusetts	Michigan							New Hampshire	New Jersey		New York	North Carolina		Ohio
F:\AUGUST 2010 PIVOT IMAGES\MASTER TMJ\carex-folliculata-inflorescence.jpg	#497	F:\AUGUST 2010 PIVOT IMAGES\MASTER TMJ\carex-folliculata-inflorescence.jpg	2010-08-02 17:11:37	C:\January 2011 GLOSS PIVOT DEPLOY TESTS\JAN 04 2011\REAL A-10\A10_files\images\carex-folliculata-inflorescence.xml	Carex folliculata			Carex	taxon	Carex folliculata	Canada	United States								Connecticut	Delaware		Georgia				Indiana					Maine	Maryland	Massachusetts	Michigan							New Hampshire	New Jersey		New York	North Carolina		Ohio
F:\AUGUST 2010 PIVOT IMAGES\MASTER TMJ\carex-folliculata-lateral-pistillate-spike.jpg	#498	F:\AUGUST 2010 PIVOT IMAGES\MASTER TMJ\carex-folliculata-lateral-pistillate-spike.jpg	2010-08-02 17:11:37	C:\January 2011 GLOSS PIVOT DEPLOY TESTS\JAN 04 2011\REAL A-10\A10_files\images\carex-folliculata-lateral-pistillate-spike.xml	Carex folliculata			Carex	taxon	Carex folliculata	Canada	United States								Connecticut	Delaware		Georgia				Indiana					Maine	Maryland	Massachusetts	Michigan							New Hampshire	New Jersey		New York	North Carolina		Ohio
F:\AUGUST 2010 PIVOT IMAGES\MASTER TMJ\carex-frankii-inflorescence.jpg	#499	F:\AUGUST 2010 PIVOT IMAGES\MASTER TMJ\carex-frankii-inflorescence.jpg	2010-08-02 17:11:37	C:\January 2011 GLOSS PIVOT DEPLOY TESTS\JAN 04 2011\REAL A-10\A10_files\images\carex-frankii-inflorescence.xml	Carex frankii			Carex	taxon	Carex frankii	Canada	United States		Alabama			Arkansas				Delaware	Florida	Georgia			Illinois	Indiana	Iowa	Kansas	Kentucky	Louisiana		Maryland		Michigan		Mississippi	Missouri		Nebraska			New Jersey	New Mexico	New York	North Carolina		Ohio	Oklahoma
F:\AUGUST 2010 PIVOT IMAGES\MASTER TMJ\carex-frankii-inflorescence-2.jpg	#500	F:\AUGUST 2010 PIVOT IMAGES\MASTER TMJ\carex-frankii-inflorescence-2.jpg	2010-08-02 17:11:37	C:\January 2011 GLOSS PIVOT DEPLOY TESTS\JAN 04 2011\REAL A-10\A10_files\images\carex-frankii-inflorescence-2.xml	Carex frankii			Carex	taxon	Carex frankii	Canada	United States		Alabama			Arkansas				Delaware	Florida	Georgia			Illinois	Indiana	Iowa	Kansas	Kentucky	Louisiana		Maryland		Michigan		Mississippi	Missouri		Nebraska			New Jersey	New Mexico	New York	North Carolina		Ohio	Oklahoma
F:\AUGUST 2010 PIVOT IMAGES\MASTER TMJ\carex-frankii-spikes.jpg	#501	F:\AUGUST 2010 PIVOT IMAGES\MASTER TMJ\carex-frankii-spikes.jpg	2010-08-02 17:11:37	C:\January 2011 GLOSS PIVOT DEPLOY TESTS\JAN 04 2011\REAL A-10\A10_files\images\carex-frankii-spikes.xml	Carex frankii			Carex	taxon	Carex frankii	Canada	United States		Alabama			Arkansas				Delaware	Florida	Georgia			Illinois	Indiana	Iowa	Kansas	Kentucky	Louisiana		Maryland		Michigan		Mississippi	Missouri		Nebraska			New Jersey	New Mexico	New York	North Carolina		Ohio	Oklahoma
F:\AUGUST 2010 PIVOT IMAGES\MASTER TMJ\carex-garberi.jpg	#502	F:\AUGUST 2010 PIVOT IMAGES\MASTER TMJ\carex-garberi.jpg	2010-08-02 17:11:37	C:\January 2011 GLOSS PIVOT DEPLOY TESTS\JAN 04 2011\REAL A-10\A10_files\images\carex-garberi.xml	Carex garberi			Carex	taxon	Carex garberi	Canada	United States			Alaska	Arizona		California	Colorado						Idaho	Illinois	Indiana					Maine			Michigan	Minnesota			Montana		Nevada	New Hampshire		New Mexico	New York		North Dakota	Ohio
F:\AUGUST 2010 PIVOT IMAGES\MASTER TMJ\carex-garberi1.jpg	#503	F:\AUGUST 2010 PIVOT IMAGES\MASTER TMJ\carex-garberi1.jpg	2010-08-02 17:11:37	C:\January 2011 GLOSS PIVOT DEPLOY TESTS\JAN 04 2011\REAL A-10\A10_files\images\carex-garberi1.xml	Carex garberi			Carex	taxon	Carex garberi	Canada	United States			Alaska	Arizona		California	Colorado						Idaho	Illinois	Indiana					Maine			Michigan	Minnesota			Montana		Nevada	New Hampshire		New Mexico	New York		North Dakota	Ohio
F:\AUGUST 2010 PIVOT IMAGES\MASTER TMJ\carex-garberi2.jpg	#504	F:\AUGUST 2010 PIVOT IMAGES\MASTER TMJ\carex-garberi2.jpg	2010-08-02 17:11:37	C:\January 2011 GLOSS PIVOT DEPLOY TESTS\JAN 04 2011\REAL A-10\A10_files\images\carex-garberi2.xml	Carex garberi			Carex	taxon	Carex garberi	Canada	United States			Alaska	Arizona		California	Colorado						Idaho	Illinois	Indiana					Maine			Michigan	Minnesota			Montana		Nevada	New Hampshire		New Mexico	New York		North Dakota	Ohio
F:\AUGUST 2010 PIVOT IMAGES\MASTER TMJ\carex-garberi3.jpg	#505	F:\AUGUST 2010 PIVOT IMAGES\MASTER TMJ\carex-garberi3.jpg	2010-08-02 17:11:37	C:\January 2011 GLOSS PIVOT DEPLOY TESTS\JAN 04 2011\REAL A-10\A10_files\images\carex-garberi3.xml	Carex garberi			Carex	taxon	Carex garberi	Canada	United States			Alaska	Arizona		California	Colorado						Idaho	Illinois	Indiana					Maine			Michigan	Minnesota			Montana		Nevada	New Hampshire		New Mexico	New York		North Dakota	Ohio
F:\AUGUST 2010 PIVOT IMAGES\MASTER TMJ\carex-garberi5.jpg	#506	F:\AUGUST 2010 PIVOT IMAGES\MASTER TMJ\carex-garberi5.jpg	2010-08-02 17:11:37	C:\January 2011 GLOSS PIVOT DEPLOY TESTS\JAN 04 2011\REAL A-10\A10_files\images\carex-garberi5.xml	Carex garberi			Carex	taxon	Carex garberi	Canada	United States			Alaska	Arizona		California	Colorado						Idaho	Illinois	Indiana					Maine			Michigan	Minnesota			Montana		Nevada	New Hampshire		New Mexico	New York		North Dakota	Ohio
F:\AUGUST 2010 PIVOT IMAGES\MASTER TMJ\carex-garberi8.jpg	#507	F:\AUGUST 2010 PIVOT IMAGES\MASTER TMJ\carex-garberi8.jpg	2010-08-02 17:11:37	C:\January 2011 GLOSS PIVOT DEPLOY TESTS\JAN 04 2011\REAL A-10\A10_files\images\carex-garberi8.xml	Carex garberi			Carex	taxon	Carex garberi	Canada	United States			Alaska	Arizona		California	Colorado						Idaho	Illinois	Indiana					Maine			Michigan	Minnesota			Montana		Nevada	New Hampshire		New Mexico	New York		North Dakota	Ohio
F:\AUGUST 2010 PIVOT IMAGES\MASTER TMJ\carex-garberi12.jpg	#508	F:\AUGUST 2010 PIVOT IMAGES\MASTER TMJ\carex-garberi12.jpg	2010-08-02 17:11:37	C:\January 2011 GLOSS PIVOT DEPLOY TESTS\JAN 04 2011\REAL A-10\A10_files\images\carex-garberi12.xml	Carex garberi			Carex	taxon	Carex garberi	Canada	United States			Alaska	Arizona		California	Colorado						Idaho	Illinois	Indiana					Maine			Michigan	Minnesota			Montana		Nevada	New Hampshire		New Mexico	New York		North Dakota	Ohio
F:\AUGUST 2010 PIVOT IMAGES\MASTER TMJ\carex-garberi-habitat2-tmj.jpg	#509	F:\AUGUST 2010 PIVOT IMAGES\MASTER TMJ\carex-garberi-habitat2-tmj.jpg	2010-08-02 17:11:37	C:\January 2011 GLOSS PIVOT DEPLOY TESTS\JAN 04 2011\REAL A-10\A10_files\images\carex-garberi-habitat2-tmj.xml	Carex garberi			Carex	taxon	Carex garberi	Canada	United States			Alaska	Arizona		California	Colorado						Idaho	Illinois	Indiana					Maine			Michigan	Minnesota			Montana		Nevada	New Hampshire		New Mexico	New York		North Dakota	Ohio
F:\AUGUST 2010 PIVOT IMAGES\MASTER TMJ\carex-garberi-maturity.jpg	#510	F:\AUGUST 2010 PIVOT IMAGES\MASTER TMJ\carex-garberi-maturity.jpg	2010-08-02 17:11:37	C:\January 2011 GLOSS PIVOT DEPLOY TESTS\JAN 04 2011\REAL A-10\A10_files\images\carex-garberi-maturity.xml	Carex garberi			Carex	taxon	Carex garberi	Canada	United States			Alaska	Arizona		California	Colorado						Idaho	Illinois	Indiana					Maine			Michigan	Minnesota			Montana		Nevada	New Hampshire		New Mexico	New York		North Dakota	Ohio
F:\AUGUST 2010 PIVOT IMAGES\MASTER TMJ\carex-geyeri-habitat.jpg	#511	F:\AUGUST 2010 PIVOT IMAGES\MASTER TMJ\carex-geyeri-habitat.jpg	2010-08-02 17:11:37	C:\January 2011 GLOSS PIVOT DEPLOY TESTS\JAN 04 2011\REAL A-10\A10_files\images\carex-geyeri-habitat.xml	Carex geyeri			Carex	taxon	Carex geyeri	Canada	United States						California	Colorado						Idaho														Montana		Nevada
F:\AUGUST 2010 PIVOT IMAGES\MASTER TMJ\carex-geyeri-inflorescence.jpg	#512	F:\AUGUST 2010 PIVOT IMAGES\MASTER TMJ\carex-geyeri-inflorescence.jpg	2010-08-02 17:11:36	C:\January 2011 GLOSS PIVOT DEPLOY TESTS\JAN 04 2011\REAL A-10\A10_files\images\carex-geyeri-inflorescence.xml	Carex geyeri			Carex	taxon	Carex geyeri	Canada	United States						California	Colorado						Idaho														Montana		Nevada
F:\AUGUST 2010 PIVOT IMAGES\MASTER TMJ\carex-geyeri-inflorescence-2.jpg	#513	F:\AUGUST 2010 PIVOT IMAGES\MASTER TMJ\carex-geyeri-inflorescence-2.jpg	2010-08-02 17:11:37	C:\January 2011 GLOSS PIVOT DEPLOY TESTS\JAN 04 2011\REAL A-10\A10_files\images\carex-geyeri-inflorescence-2.xml	Carex geyeri			Carex	taxon	Carex geyeri	Canada	United States						California	Colorado						Idaho														Montana		Nevada
F:\AUGUST 2010 PIVOT IMAGES\MASTER TMJ\carex-gigantea-habit.jpg	#514	F:\AUGUST 2010 PIVOT IMAGES\MASTER TMJ\carex-gigantea-habit.jpg	2010-08-02 17:11:36	C:\January 2011 GLOSS PIVOT DEPLOY TESTS\JAN 04 2011\REAL A-10\A10_files\images\carex-gigantea-habit.xml	Carex gigantea			Carex	taxon	Carex gigantea		United States		Alabama			Arkansas				Delaware	Florida	Georgia			Illinois	Indiana			Kentucky	Louisiana							Missouri								North Carolina			Oklahoma
F:\AUGUST 2010 PIVOT IMAGES\MASTER TMJ\carex-gigantea-habitat.jpg	#515	F:\AUGUST 2010 PIVOT IMAGES\MASTER TMJ\carex-gigantea-habitat.jpg	2010-08-02 17:11:36	C:\January 2011 GLOSS PIVOT DEPLOY TESTS\JAN 04 2011\REAL A-10\A10_files\images\carex-gigantea-habitat.xml	Carex gigantea			Carex	taxon	Carex gigantea		United States		Alabama			Arkansas				Delaware	Florida	Georgia			Illinois	Indiana			Kentucky	Louisiana							Missouri								North Carolina			Oklahoma
F:\AUGUST 2010 PIVOT IMAGES\MASTER TMJ\carex-gigantea-inflorescence-3.jpg	#516	F:\AUGUST 2010 PIVOT IMAGES\MASTER TMJ\carex-gigantea-inflorescence-3.jpg	2010-05-18 20:10:02	C:\January 2011 GLOSS PIVOT DEPLOY TESTS\JAN 04 2011\REAL A-10\A10_files\images\carex-gigantea-inflorescence-3.xml	Carex gigantea			Carex	taxon	Carex gigantea		United States		Alabama			Arkansas				Delaware	Florida	Georgia			Illinois	Indiana			Kentucky	Louisiana							Missouri								North Carolina			Oklahoma
F:\AUGUST 2010 PIVOT IMAGES\MASTER TMJ\carex-gigantea-inflorescence-anthesis.jpg	#517	F:\AUGUST 2010 PIVOT IMAGES\MASTER TMJ\carex-gigantea-inflorescence-anthesis.jpg	2010-08-02 17:11:36	C:\January 2011 GLOSS PIVOT DEPLOY TESTS\JAN 04 2011\REAL A-10\A10_files\images\carex-gigantea-inflorescence-anthesis.xml	Carex gigantea			Carex	taxon	Carex gigantea		United States		Alabama			Arkansas				Delaware	Florida	Georgia			Illinois	Indiana			Kentucky	Louisiana							Missouri								North Carolina			Oklahoma
F:\AUGUST 2010 PIVOT IMAGES\MASTER TMJ\carex-gigantea-lateral-spikes.jpg	#518	F:\AUGUST 2010 PIVOT IMAGES\MASTER TMJ\carex-gigantea-lateral-spikes.jpg	2010-08-02 17:11:36	C:\January 2011 GLOSS PIVOT DEPLOY TESTS\JAN 04 2011\REAL A-10\A10_files\images\carex-gigantea-lateral-spikes.xml	Carex gigantea			Carex	taxon	Carex gigantea		United States		Alabama			Arkansas				Delaware	Florida	Georgia			Illinois	Indiana			Kentucky	Louisiana							Missouri								North Carolina			Oklahoma
F:\AUGUST 2010 PIVOT IMAGES\MASTER TMJ\carex-glaucescens-habitat-dmm.jpg	#519	F:\AUGUST 2010 PIVOT IMAGES\MASTER TMJ\carex-glaucescens-habitat-dmm.jpg	2010-08-02 17:11:36	C:\January 2011 GLOSS PIVOT DEPLOY TESTS\JAN 04 2011\REAL A-10\A10_files\images\carex-glaucescens-habitat-dmm.xml	Carex glaucescens			Carex	taxon	Carex glaucescens		United States		Alabama								Florida	Georgia								Louisiana						Mississippi									North Carolina
F:\AUGUST 2010 PIVOT IMAGES\MASTER TMJ\carex-glaucescens-inflorescence.jpg	#520	F:\AUGUST 2010 PIVOT IMAGES\MASTER TMJ\carex-glaucescens-inflorescence.jpg	2010-08-02 17:11:36	C:\January 2011 GLOSS PIVOT DEPLOY TESTS\JAN 04 2011\REAL A-10\A10_files\images\carex-glaucescens-inflorescence.xml	Carex glaucescens			Carex	taxon	Carex glaucescens		United States		Alabama								Florida	Georgia								Louisiana						Mississippi									North Carolina
F:\AUGUST 2010 PIVOT IMAGES\MASTER TMJ\carex-glaucescens-inflorescence-10.jpg	#521	F:\AUGUST 2010 PIVOT IMAGES\MASTER TMJ\carex-glaucescens-inflorescence-10.jpg	2010-08-02 17:11:36	C:\January 2011 GLOSS PIVOT DEPLOY TESTS\JAN 04 2011\REAL A-10\A10_files\images\carex-glaucescens-inflorescence-10.xml	Carex glaucescens			Carex	taxon	Carex glaucescens		United States		Alabama								Florida	Georgia								Louisiana						Mississippi									North Carolina
F:\AUGUST 2010 PIVOT IMAGES\MASTER TMJ\carex-glaucescens-lateral-spike-androgynous-spike.jpg	#522	F:\AUGUST 2010 PIVOT IMAGES\MASTER TMJ\carex-glaucescens-lateral-spike-androgynous-spike.jpg	2010-08-02 17:11:36	C:\January 2011 GLOSS PIVOT DEPLOY TESTS\JAN 04 2011\REAL A-10\A10_files\images\carex-glaucescens-lateral-spike-androgynous-spike.xml	Carex glaucescens			Carex	taxon	Carex glaucescens		United States		Alabama								Florida	Georgia								Louisiana						Mississippi									North Carolina
F:\AUGUST 2010 PIVOT IMAGES\MASTER TMJ\carex-glaucescens-lateral-spike-anthesis.jpg	#523	F:\AUGUST 2010 PIVOT IMAGES\MASTER TMJ\carex-glaucescens-lateral-spike-anthesis.jpg	2010-08-02 17:11:36	C:\January 2011 GLOSS PIVOT DEPLOY TESTS\JAN 04 2011\REAL A-10\A10_files\images\carex-glaucescens-lateral-spike-anthesis.xml	Carex glaucescens			Carex	taxon	Carex glaucescens		United States		Alabama								Florida	Georgia								Louisiana						Mississippi									North Carolina
F:\AUGUST 2010 PIVOT IMAGES\MASTER TMJ\carex-glaucescens--lateral-spikes.jpg	#524	F:\AUGUST 2010 PIVOT IMAGES\MASTER TMJ\carex-glaucescens--lateral-spikes.jpg	2010-08-02 17:11:36	C:\January 2011 GLOSS PIVOT DEPLOY TESTS\JAN 04 2011\REAL A-10\A10_files\images\carex-glaucescens--lateral-spikes.xml	Carex glaucescens			Carex	taxon	Carex glaucescens		United States		Alabama								Florida	Georgia								Louisiana						Mississippi									North Carolina
F:\AUGUST 2010 PIVOT IMAGES\MASTER TMJ\carex-glaucescens-pre-anthesis.jpg	#525	F:\AUGUST 2010 PIVOT IMAGES\MASTER TMJ\carex-glaucescens-pre-anthesis.jpg	2010-08-02 17:11:36	C:\January 2011 GLOSS PIVOT DEPLOY TESTS\JAN 04 2011\REAL A-10\A10_files\images\carex-glaucescens-pre-anthesis.xml	Carex glaucescens			Carex	taxon	Carex glaucescens		United States		Alabama								Florida	Georgia								Louisiana						Mississippi									North Carolina
F:\AUGUST 2010 PIVOT IMAGES\MASTER TMJ\carex-glaucescens-terminal-spike-anthesis.jpg	#526	F:\AUGUST 2010 PIVOT IMAGES\MASTER TMJ\carex-glaucescens-terminal-spike-anthesis.jpg	2010-08-02 17:11:36	C:\January 2011 GLOSS PIVOT DEPLOY TESTS\JAN 04 2011\REAL A-10\A10_files\images\carex-glaucescens-terminal-spike-anthesis.xml	Carex glaucescens			Carex	taxon	Carex glaucescens		United States		Alabama								Florida	Georgia								Louisiana						Mississippi									North Carolina
F:\AUGUST 2010 PIVOT IMAGES\MASTER TMJ\carex-gracillima-lateral-spike.jpg	#527	F:\AUGUST 2010 PIVOT IMAGES\MASTER TMJ\carex-gracillima-lateral-spike.jpg	2010-08-02 17:11:36	C:\January 2011 GLOSS PIVOT DEPLOY TESTS\JAN 04 2011\REAL A-10\A10_files\images\carex-gracillima-lateral-spike.xml	Carex gracillima			Carex	taxon	Carex gracillima	Canada	United States		Alabama			Arkansas			Connecticut	Delaware		Georgia			Illinois	Indiana	Iowa		Kentucky		Maine	Maryland	Massachusetts	Michigan	Minnesota		Missouri				New Hampshire	New Jersey		New York	North Carolina	North Dakota	Ohio
F:\AUGUST 2010 PIVOT IMAGES\MASTER TMJ\carex-gracillima-terminal-gynecandrous-spike.jpg	#528	F:\AUGUST 2010 PIVOT IMAGES\MASTER TMJ\carex-gracillima-terminal-gynecandrous-spike.jpg	2010-08-02 17:11:36	C:\January 2011 GLOSS PIVOT DEPLOY TESTS\JAN 04 2011\REAL A-10\A10_files\images\carex-gracillima-terminal-gynecandrous-spike.xml	Carex gracillima			Carex	taxon	Carex gracillima	Canada	United States		Alabama			Arkansas			Connecticut	Delaware		Georgia			Illinois	Indiana	Iowa		Kentucky		Maine	Maryland	Massachusetts	Michigan	Minnesota		Missouri				New Hampshire	New Jersey		New York	North Carolina	North Dakota	Ohio
F:\AUGUST 2010 PIVOT IMAGES\MASTER TMJ\carex-granularis (1).JPG	#529	F:\AUGUST 2010 PIVOT IMAGES\MASTER TMJ\carex-granularis (1).JPG	2010-09-20 12:24:22	C:\January 2011 GLOSS PIVOT DEPLOY TESTS\JAN 04 2011\REAL A-10\A10_files\images\carex-granularis(1).xml	Carex granularis			Carex	taxon	Carex granularis	Canada	United States		Alabama			Arkansas			Connecticut	Delaware		Georgia			Illinois	Indiana	Iowa	Kansas	Kentucky	Louisiana	Maine	Maryland	Massachusetts	Michigan	Minnesota	Mississippi	Missouri		Nebraska		New Hampshire	New Jersey		New York	North Carolina	North Dakota	Ohio	Oklahoma
F:\AUGUST 2010 PIVOT IMAGES\MASTER TMJ\carex-granularis (3).JPG	#530	F:\AUGUST 2010 PIVOT IMAGES\MASTER TMJ\carex-granularis (3).JPG	2010-09-20 12:24:18	C:\January 2011 GLOSS PIVOT DEPLOY TESTS\JAN 04 2011\REAL A-10\A10_files\images\carex-granularis(3).xml	Carex cephalophora			Carex	taxon	Carex cephalophora	Canada	United States		Alabama			Arkansas			Connecticut	Delaware	Florida	Georgia			Illinois	Indiana	Iowa	Kansas	Kentucky	Louisiana	Maine	Maryland	Massachusetts	Michigan	Minnesota	Mississippi	Missouri		Nebraska		New Hampshire	New Jersey	New Mexico		North Carolina		Ohio	Oklahoma
F:\AUGUST 2010 PIVOT IMAGES\MASTER TMJ\carex-granularis (9).JPG	#531	F:\AUGUST 2010 PIVOT IMAGES\MASTER TMJ\carex-granularis (9).JPG	2007-05-31 19:53:12	C:\January 2011 GLOSS PIVOT DEPLOY TESTS\JAN 04 2011\REAL A-10\A10_files\images\carex-granularis(9).xml	Carex granularis			Carex	taxon	Carex granularis	Canada	United States		Alabama			Arkansas			Connecticut	Delaware		Georgia			Illinois	Indiana	Iowa	Kansas	Kentucky	Louisiana	Maine	Maryland	Massachusetts	Michigan	Minnesota	Mississippi	Missouri		Nebraska		New Hampshire	New Jersey		New York	North Carolina	North Dakota	Ohio	Oklahoma
F:\AUGUST 2010 PIVOT IMAGES\MASTER TMJ\carex-granularis (10).JPG	#532	F:\AUGUST 2010 PIVOT IMAGES\MASTER TMJ\carex-granularis (10).JPG	2007-05-31 19:53:24	C:\January 2011 GLOSS PIVOT DEPLOY TESTS\JAN 04 2011\REAL A-10\A10_files\images\carex-granularis(10).xml	Carex granularis			Carex	taxon	Carex granularis	Canada	United States		Alabama			Arkansas			Connecticut	Delaware		Georgia			Illinois	Indiana	Iowa	Kansas	Kentucky	Louisiana	Maine	Maryland	Massachusetts	Michigan	Minnesota	Mississippi	Missouri		Nebraska		New Hampshire	New Jersey		New York	North Carolina	North Dakota	Ohio	Oklahoma
F:\AUGUST 2010 PIVOT IMAGES\MASTER TMJ\carex-granularis (26).JPG	#533	F:\AUGUST 2010 PIVOT IMAGES\MASTER TMJ\carex-granularis (26).JPG	2007-05-31 19:54:09	C:\January 2011 GLOSS PIVOT DEPLOY TESTS\JAN 04 2011\REAL A-10\A10_files\images\carex-granularis(26).xml	Carex granularis			Carex	taxon	Carex granularis	Canada	United States		Alabama			Arkansas			Connecticut	Delaware		Georgia			Illinois	Indiana	Iowa	Kansas	Kentucky	Louisiana	Maine	Maryland	Massachusetts	Michigan	Minnesota	Mississippi	Missouri		Nebraska		New Hampshire	New Jersey		New York	North Carolina	North Dakota	Ohio	Oklahoma
F:\AUGUST 2010 PIVOT IMAGES\MASTER TMJ\carex-grayi-anthesis.jpg	#534	F:\AUGUST 2010 PIVOT IMAGES\MASTER TMJ\carex-grayi-anthesis.jpg	2010-08-02 17:11:36	C:\January 2011 GLOSS PIVOT DEPLOY TESTS\JAN 04 2011\REAL A-10\A10_files\images\carex-grayi-anthesis.xml	Carex grayi			Carex	taxon	Carex grayi	Canada	United States		Alabama			Arkansas			Connecticut	Delaware	Florida	Georgia			Illinois	Indiana	Iowa	Kansas	Kentucky			Maryland	Massachusetts	Michigan	Minnesota	Mississippi	Missouri					New Jersey		New York	North Carolina		Ohio	Oklahoma
F:\AUGUST 2010 PIVOT IMAGES\MASTER TMJ\carex-grisea20100312_0122.jpg	#535	F:\AUGUST 2010 PIVOT IMAGES\MASTER TMJ\carex-grisea20100312_0122.jpg	2010-08-02 17:11:36	C:\January 2011 GLOSS PIVOT DEPLOY TESTS\JAN 04 2011\REAL A-10\A10_files\images\carex-grisea20100312_0122.xml	Carex grisea			Carex	taxon	Carex grisea	Canada	United States		Alabama			Arkansas			Connecticut	Delaware	Florida	Georgia			Illinois	Indiana	Iowa	Kansas	Kentucky	Louisiana	Maine	Maryland	Massachusetts	Michigan	Minnesota	Mississippi	Missouri		Nebraska		New Hampshire	New Jersey		New York	North Carolina		Ohio	Oklahoma
F:\AUGUST 2010 PIVOT IMAGES\MASTER TMJ\carex-grisea20100312_0125.jpg	#536	F:\AUGUST 2010 PIVOT IMAGES\MASTER TMJ\carex-grisea20100312_0125.jpg	2010-08-02 17:11:36	C:\January 2011 GLOSS PIVOT DEPLOY TESTS\JAN 04 2011\REAL A-10\A10_files\images\carex-grisea20100312_0125.xml	Carex grisea			Carex	taxon	Carex grisea	Canada	United States		Alabama			Arkansas			Connecticut	Delaware	Florida	Georgia			Illinois	Indiana	Iowa	Kansas	Kentucky	Louisiana	Maine	Maryland	Massachusetts	Michigan	Minnesota	Mississippi	Missouri		Nebraska		New Hampshire	New Jersey		New York	North Carolina		Ohio	Oklahoma
F:\AUGUST 2010 PIVOT IMAGES\MASTER TMJ\carex-grisea-lateral-spike-2.jpg	#537	F:\AUGUST 2010 PIVOT IMAGES\MASTER TMJ\carex-grisea-lateral-spike-2.jpg	2010-08-02 17:11:36	C:\January 2011 GLOSS PIVOT DEPLOY TESTS\JAN 04 2011\REAL A-10\A10_files\images\carex-grisea-lateral-spike-2.xml	Carex grisea			Carex	taxon	Carex grisea	Canada	United States		Alabama			Arkansas			Connecticut	Delaware	Florida	Georgia			Illinois	Indiana	Iowa	Kansas	Kentucky	Louisiana	Maine	Maryland	Massachusetts	Michigan	Minnesota	Mississippi	Missouri		Nebraska		New Hampshire	New Jersey		New York	North Carolina		Ohio	Oklahoma
F:\AUGUST 2010 PIVOT IMAGES\MASTER TMJ\carex-grisea-terminal-inflorescence.jpg	#538	F:\AUGUST 2010 PIVOT IMAGES\MASTER TMJ\carex-grisea-terminal-inflorescence.jpg	2010-08-02 17:11:36	C:\January 2011 GLOSS PIVOT DEPLOY TESTS\JAN 04 2011\REAL A-10\A10_files\images\carex-grisea-terminal-inflorescence.xml	Carex grisea			Carex	taxon	Carex grisea	Canada	United States		Alabama			Arkansas			Connecticut	Delaware	Florida	Georgia			Illinois	Indiana	Iowa	Kansas	Kentucky	Louisiana	Maine	Maryland	Massachusetts	Michigan	Minnesota	Mississippi	Missouri		Nebraska		New Hampshire	New Jersey		New York	North Carolina		Ohio	Oklahoma
F:\AUGUST 2010 PIVOT IMAGES\MASTER TMJ\carex-hitchcockiana (2).JPG	#539	F:\AUGUST 2010 PIVOT IMAGES\MASTER TMJ\carex-hitchcockiana (2).JPG	2007-05-31 20:05:32	C:\January 2011 GLOSS PIVOT DEPLOY TESTS\JAN 04 2011\REAL A-10\A10_files\images\carex-hitchcockiana(2).xml	Carex hitchcockiana			Carex	taxon	Carex hitchcockiana	Canada	United States		Alabama			Arkansas			Connecticut						Illinois	Indiana	Iowa	Kansas	Kentucky			Maryland	Massachusetts	Michigan	Minnesota		Missouri					New Jersey		New York			Ohio	Oklahoma
F:\AUGUST 2010 PIVOT IMAGES\MASTER TMJ\carex-hitchcockiana (3).JPG	#540	F:\AUGUST 2010 PIVOT IMAGES\MASTER TMJ\carex-hitchcockiana (3).JPG	2007-05-31 20:05:39	C:\January 2011 GLOSS PIVOT DEPLOY TESTS\JAN 04 2011\REAL A-10\A10_files\images\carex-hitchcockiana(3).xml	Carex hitchcockiana			Carex	taxon	Carex hitchcockiana	Canada	United States		Alabama			Arkansas			Connecticut						Illinois	Indiana	Iowa	Kansas	Kentucky			Maryland	Massachusetts	Michigan	Minnesota		Missouri					New Jersey		New York			Ohio	Oklahoma
F:\AUGUST 2010 PIVOT IMAGES\MASTER TMJ\carex-hitchcockiana (6).JPG	#541	F:\AUGUST 2010 PIVOT IMAGES\MASTER TMJ\carex-hitchcockiana (6).JPG	2007-05-31 20:05:47	C:\January 2011 GLOSS PIVOT DEPLOY TESTS\JAN 04 2011\REAL A-10\A10_files\images\carex-hitchcockiana(6).xml	Carex hitchcockiana			Carex	taxon	Carex hitchcockiana	Canada	United States		Alabama			Arkansas			Connecticut						Illinois	Indiana	Iowa	Kansas	Kentucky			Maryland	Massachusetts	Michigan	Minnesota		Missouri					New Jersey		New York			Ohio	Oklahoma
F:\AUGUST 2010 PIVOT IMAGES\MASTER TMJ\carex-hitcockiana-habit.jpg	#542	F:\AUGUST 2010 PIVOT IMAGES\MASTER TMJ\carex-hitcockiana-habit.jpg	2010-08-02 17:11:36	C:\January 2011 GLOSS PIVOT DEPLOY TESTS\JAN 04 2011\REAL A-10\A10_files\images\carex-hitcockiana-habit.xml	Carex hitchcockiana			Carex	taxon	Carex hitchcockiana	Canada	United States		Alabama			Arkansas			Connecticut						Illinois	Indiana	Iowa	Kansas	Kentucky			Maryland	Massachusetts	Michigan	Minnesota		Missouri					New Jersey		New York			Ohio	Oklahoma
F:\AUGUST 2010 PIVOT IMAGES\MASTER TMJ\carex-hitcockiana-habit2.jpg	#543	F:\AUGUST 2010 PIVOT IMAGES\MASTER TMJ\carex-hitcockiana-habit2.jpg	2010-08-02 17:11:36	C:\January 2011 GLOSS PIVOT DEPLOY TESTS\JAN 04 2011\REAL A-10\A10_files\images\carex-hitcockiana-habit2.xml	Carex hitchcockiana			Carex	taxon	Carex hitchcockiana	Canada	United States		Alabama			Arkansas			Connecticut						Illinois	Indiana	Iowa	Kansas	Kentucky			Maryland	Massachusetts	Michigan	Minnesota		Missouri					New Jersey		New York			Ohio	Oklahoma
F:\AUGUST 2010 PIVOT IMAGES\MASTER TMJ\carex-hyalinolepis-anthesis-staminate-spike.jpg	#544	F:\AUGUST 2010 PIVOT IMAGES\MASTER TMJ\carex-hyalinolepis-anthesis-staminate-spike.jpg	2010-08-02 17:11:36	C:\January 2011 GLOSS PIVOT DEPLOY TESTS\JAN 04 2011\REAL A-10\A10_files\images\carex-hyalinolepis-anthesis-staminate-spike.xml	Carex hyalinolepis			Carex	taxon	Carex hyalinolepis	Canada	United States		Alabama			Arkansas					Florida	Georgia			Illinois	Indiana	Iowa	Kansas	Kentucky	Louisiana		Maryland		Michigan		Mississippi	Missouri		Nebraska						North Carolina		Ohio	Oklahoma
F:\AUGUST 2010 PIVOT IMAGES\MASTER TMJ\carex-hyalinolepis-anthesis-styles-withering.jpg	#545	F:\AUGUST 2010 PIVOT IMAGES\MASTER TMJ\carex-hyalinolepis-anthesis-styles-withering.jpg	2010-08-02 17:11:36	C:\January 2011 GLOSS PIVOT DEPLOY TESTS\JAN 04 2011\REAL A-10\A10_files\images\carex-hyalinolepis-anthesis-styles-withering.xml	Carex hyalinolepis			Carex	taxon	Carex hyalinolepis	Canada	United States		Alabama			Arkansas					Florida	Georgia			Illinois	Indiana	Iowa	Kansas	Kentucky	Louisiana		Maryland		Michigan		Mississippi	Missouri		Nebraska						North Carolina		Ohio	Oklahoma
F:\AUGUST 2010 PIVOT IMAGES\MASTER TMJ\carex-hyalinolepis-habit.jpg	#546	F:\AUGUST 2010 PIVOT IMAGES\MASTER TMJ\carex-hyalinolepis-habit.jpg	2010-08-02 17:11:36	C:\January 2011 GLOSS PIVOT DEPLOY TESTS\JAN 04 2011\REAL A-10\A10_files\images\carex-hyalinolepis-habit.xml	Carex hyalinolepis			Carex	taxon	Carex hyalinolepis	Canada	United States		Alabama			Arkansas					Florida	Georgia			Illinois	Indiana	Iowa	Kansas	Kentucky	Louisiana		Maryland		Michigan		Mississippi	Missouri		Nebraska						North Carolina		Ohio	Oklahoma
F:\AUGUST 2010 PIVOT IMAGES\MASTER TMJ\carex-hyalinolepis-habitat.jpg	#547	F:\AUGUST 2010 PIVOT IMAGES\MASTER TMJ\carex-hyalinolepis-habitat.jpg	2010-08-02 17:11:36	C:\January 2011 GLOSS PIVOT DEPLOY TESTS\JAN 04 2011\REAL A-10\A10_files\images\carex-hyalinolepis-habitat.xml	Carex hyalinolepis			Carex	taxon	Carex hyalinolepis	Canada	United States		Alabama			Arkansas					Florida	Georgia			Illinois	Indiana	Iowa	Kansas	Kentucky	Louisiana		Maryland		Michigan		Mississippi	Missouri		Nebraska						North Carolina		Ohio	Oklahoma
F:\AUGUST 2010 PIVOT IMAGES\MASTER TMJ\carex-hyalinolepis-habitat-2.jpg	#548	F:\AUGUST 2010 PIVOT IMAGES\MASTER TMJ\carex-hyalinolepis-habitat-2.jpg	2010-08-02 17:11:36	C:\January 2011 GLOSS PIVOT DEPLOY TESTS\JAN 04 2011\REAL A-10\A10_files\images\carex-hyalinolepis-habitat-2.xml	Carex hyalinolepis			Carex	taxon	Carex hyalinolepis	Canada	United States		Alabama			Arkansas					Florida	Georgia			Illinois	Indiana	Iowa	Kansas	Kentucky	Louisiana		Maryland		Michigan		Mississippi	Missouri		Nebraska						North Carolina		Ohio	Oklahoma
F:\AUGUST 2010 PIVOT IMAGES\MASTER TMJ\carex-hyalinolepis-inflorescence-anthesis.jpg	#549	F:\AUGUST 2010 PIVOT IMAGES\MASTER TMJ\carex-hyalinolepis-inflorescence-anthesis.jpg	2010-08-02 17:11:36	C:\January 2011 GLOSS PIVOT DEPLOY TESTS\JAN 04 2011\REAL A-10\A10_files\images\carex-hyalinolepis-inflorescence-anthesis.xml	Carex hyalinolepis			Carex	taxon	Carex hyalinolepis	Canada	United States		Alabama			Arkansas					Florida	Georgia			Illinois	Indiana	Iowa	Kansas	Kentucky	Louisiana		Maryland		Michigan		Mississippi	Missouri		Nebraska						North Carolina		Ohio	Oklahoma
F:\AUGUST 2010 PIVOT IMAGES\MASTER TMJ\carex-hystericina-habit.jpg	#550	F:\AUGUST 2010 PIVOT IMAGES\MASTER TMJ\carex-hystericina-habit.jpg	2010-08-02 17:11:36	C:\January 2011 GLOSS PIVOT DEPLOY TESTS\JAN 04 2011\REAL A-10\A10_files\images\carex-hystericina-habit.xml	Carex hystericina			Carex	taxon	Carex hystericina	Canada	United States				Arizona	Arkansas	California		Connecticut			Georgia		Idaho	Illinois	Indiana	Iowa	Kansas	Kentucky		Maine	Maryland	Massachusetts	Michigan	Minnesota		Missouri	Montana	Nebraska		New Hampshire	New Jersey	New Mexico	New York		North Dakota	Ohio
F:\AUGUST 2010 PIVOT IMAGES\MASTER TMJ\carex-hystericina-habit-4.jpg	#551	F:\AUGUST 2010 PIVOT IMAGES\MASTER TMJ\carex-hystericina-habit-4.jpg	2010-08-02 17:11:36	C:\January 2011 GLOSS PIVOT DEPLOY TESTS\JAN 04 2011\REAL A-10\A10_files\images\carex-hystericina-habit-4.xml	Carex hystericina			Carex	taxon	Carex hystericina	Canada	United States				Arizona	Arkansas	California		Connecticut			Georgia		Idaho	Illinois	Indiana	Iowa	Kansas	Kentucky		Maine	Maryland	Massachusetts	Michigan	Minnesota		Missouri	Montana	Nebraska		New Hampshire	New Jersey	New Mexico	New York		North Dakota	Ohio
F:\AUGUST 2010 PIVOT IMAGES\MASTER TMJ\carex-hystericina-habitat.jpg	#552	F:\AUGUST 2010 PIVOT IMAGES\MASTER TMJ\carex-hystericina-habitat.jpg	2010-08-02 17:11:36	C:\January 2011 GLOSS PIVOT DEPLOY TESTS\JAN 04 2011\REAL A-10\A10_files\images\carex-hystericina-habitat.xml	Carex hystericina			Carex	taxon	Carex hystericina	Canada	United States				Arizona	Arkansas	California		Connecticut			Georgia		Idaho	Illinois	Indiana	Iowa	Kansas	Kentucky		Maine	Maryland	Massachusetts	Michigan	Minnesota		Missouri	Montana	Nebraska		New Hampshire	New Jersey	New Mexico	New York		North Dakota	Ohio
F:\AUGUST 2010 PIVOT IMAGES\MASTER TMJ\carex-hystericina-inflorescence.jpg	#553	F:\AUGUST 2010 PIVOT IMAGES\MASTER TMJ\carex-hystericina-inflorescence.jpg	2010-08-02 17:11:36	C:\January 2011 GLOSS PIVOT DEPLOY TESTS\JAN 04 2011\REAL A-10\A10_files\images\carex-hystericina-inflorescence.xml	Carex hystericina			Carex	taxon	Carex hystericina	Canada	United States				Arizona	Arkansas	California		Connecticut			Georgia		Idaho	Illinois	Indiana	Iowa	Kansas	Kentucky		Maine	Maryland	Massachusetts	Michigan	Minnesota		Missouri	Montana	Nebraska		New Hampshire	New Jersey	New Mexico	New York		North Dakota	Ohio
F:\AUGUST 2010 PIVOT IMAGES\MASTER TMJ\carex-hystericina-inflorescence2.jpg	#554	F:\AUGUST 2010 PIVOT IMAGES\MASTER TMJ\carex-hystericina-inflorescence2.jpg	2010-08-02 17:11:36	C:\January 2011 GLOSS PIVOT DEPLOY TESTS\JAN 04 2011\REAL A-10\A10_files\images\carex-hystericina-inflorescence2.xml	Carex hystericina			Carex	taxon	Carex hystericina	Canada	United States				Arizona	Arkansas	California		Connecticut			Georgia		Idaho	Illinois	Indiana	Iowa	Kansas	Kentucky		Maine	Maryland	Massachusetts	Michigan	Minnesota		Missouri	Montana	Nebraska		New Hampshire	New Jersey	New Mexico	New York		North Dakota	Ohio
F:\AUGUST 2010 PIVOT IMAGES\MASTER TMJ\carex-intumescens-habitat.jpg	#555	F:\AUGUST 2010 PIVOT IMAGES\MASTER TMJ\carex-intumescens-habitat.jpg	2010-08-02 17:11:36	C:\January 2011 GLOSS PIVOT DEPLOY TESTS\JAN 04 2011\REAL A-10\A10_files\images\carex-intumescens-habitat.xml	Carex intumescens			Carex	taxon	Carex intumescens	Canada	United States		Alabama			Arkansas			Connecticut	Delaware	Florida	Georgia			Illinois	Indiana	Iowa		Kentucky	Louisiana	Maine	Maryland	Massachusetts	Michigan	Minnesota	Mississippi	Missouri				New Hampshire	New Jersey		New York	North Carolina		Ohio	Oklahoma
F:\AUGUST 2010 PIVOT IMAGES\MASTER TMJ\carex-intumescens-lateral-spike.jpg	#556	F:\AUGUST 2010 PIVOT IMAGES\MASTER TMJ\carex-intumescens-lateral-spike.jpg	2010-08-02 17:11:36	C:\January 2011 GLOSS PIVOT DEPLOY TESTS\JAN 04 2011\REAL A-10\A10_files\images\carex-intumescens-lateral-spike.xml	Carex intumescens			Carex	taxon	Carex intumescens	Canada	United States		Alabama			Arkansas			Connecticut	Delaware	Florida	Georgia			Illinois	Indiana	Iowa		Kentucky	Louisiana	Maine	Maryland	Massachusetts	Michigan	Minnesota	Mississippi	Missouri				New Hampshire	New Jersey		New York	North Carolina		Ohio	Oklahoma
F:\AUGUST 2010 PIVOT IMAGES\MASTER TMJ\carex-intumescens-lateral-spikes-anthesis.jpg	#557	F:\AUGUST 2010 PIVOT IMAGES\MASTER TMJ\carex-intumescens-lateral-spikes-anthesis.jpg	2010-08-02 17:11:36	C:\January 2011 GLOSS PIVOT DEPLOY TESTS\JAN 04 2011\REAL A-10\A10_files\images\carex-intumescens-lateral-spikes-anthesis.xml	Carex intumescens			Carex	taxon	Carex intumescens	Canada	United States		Alabama			Arkansas			Connecticut	Delaware	Florida	Georgia			Illinois	Indiana	Iowa		Kentucky	Louisiana	Maine	Maryland	Massachusetts	Michigan	Minnesota	Mississippi	Missouri				New Hampshire	New Jersey		New York	North Carolina		Ohio	Oklahoma
F:\AUGUST 2010 PIVOT IMAGES\MASTER TMJ\carex-intumescens-terminal-staminate-spike.jpg	#558	F:\AUGUST 2010 PIVOT IMAGES\MASTER TMJ\carex-intumescens-terminal-staminate-spike.jpg	2010-08-02 17:11:35	C:\January 2011 GLOSS PIVOT DEPLOY TESTS\JAN 04 2011\REAL A-10\A10_files\images\carex-intumescens-terminal-staminate-spike.xml	Carex intumescens			Carex	taxon	Carex intumescens	Canada	United States		Alabama			Arkansas			Connecticut	Delaware	Florida	Georgia			Illinois	Indiana	Iowa		Kentucky	Louisiana	Maine	Maryland	Massachusetts	Michigan	Minnesota	Mississippi	Missouri				New Hampshire	New Jersey		New York	North Carolina		Ohio	Oklahoma
F:\AUGUST 2010 PIVOT IMAGES\MASTER TMJ\carex-jamesii20070921_0126.JPG	#559	F:\AUGUST 2010 PIVOT IMAGES\MASTER TMJ\carex-jamesii20070921_0126.JPG	2010-08-02 17:11:35	C:\January 2011 GLOSS PIVOT DEPLOY TESTS\JAN 04 2011\REAL A-10\A10_files\images\carex-jamesii20070921_0126.xml	Carex jamesii			Carex	taxon	Carex jamesii	Canada	United States	Mexico	Alabama			Arkansas						Georgia			Illinois	Indiana	Iowa	Kansas	Kentucky			Maryland		Michigan	Minnesota	Mississippi	Missouri		Nebraska			New Jersey		New York	North Carolina		Ohio	Oklahoma
F:\AUGUST 2010 PIVOT IMAGES\MASTER TMJ\carex-joorii-tmj.jpg	#560	F:\AUGUST 2010 PIVOT IMAGES\MASTER TMJ\carex-joorii-tmj.jpg	2010-08-02 17:11:35	C:\January 2011 GLOSS PIVOT DEPLOY TESTS\JAN 04 2011\REAL A-10\A10_files\images\carex-joorii-tmj.xml	Carex joorii			Carex	taxon	Carex joorii		United States		Alabama			Arkansas					Florida	Georgia							Kentucky	Louisiana		Maryland				Mississippi	Missouri								North Carolina
F:\AUGUST 2010 PIVOT IMAGES\MASTER TMJ\carex-lacustris-habit.jpg	#561	F:\AUGUST 2010 PIVOT IMAGES\MASTER TMJ\carex-lacustris-habit.jpg	2010-08-02 17:11:35	C:\January 2011 GLOSS PIVOT DEPLOY TESTS\JAN 04 2011\REAL A-10\A10_files\images\carex-lacustris-habit.xml	Carex lacustris			Carex	taxon	Carex lacustris	Canada	United States								Connecticut	Delaware				Idaho	Illinois	Indiana	Iowa	Kansas			Maine	Maryland	Massachusetts	Michigan	Minnesota		Missouri		Nebraska		New Hampshire	New Jersey		New York		North Dakota	Ohio
F:\AUGUST 2010 PIVOT IMAGES\MASTER TMJ\carex-lacustris-inflorescence-anthesis.jpg	#562	F:\AUGUST 2010 PIVOT IMAGES\MASTER TMJ\carex-lacustris-inflorescence-anthesis.jpg	2010-08-02 17:11:35	C:\January 2011 GLOSS PIVOT DEPLOY TESTS\JAN 04 2011\REAL A-10\A10_files\images\carex-lacustris-inflorescence-anthesis.xml	Carex lacustris			Carex	taxon	Carex lacustris	Canada	United States								Connecticut	Delaware				Idaho	Illinois	Indiana	Iowa	Kansas			Maine	Maryland	Massachusetts	Michigan	Minnesota		Missouri		Nebraska		New Hampshire	New Jersey		New York		North Dakota	Ohio
F:\AUGUST 2010 PIVOT IMAGES\MASTER TMJ\carex-lacustris-lateral-spike.jpg	#563	F:\AUGUST 2010 PIVOT IMAGES\MASTER TMJ\carex-lacustris-lateral-spike.jpg	2010-08-02 17:11:35	C:\January 2011 GLOSS PIVOT DEPLOY TESTS\JAN 04 2011\REAL A-10\A10_files\images\carex-lacustris-lateral-spike.xml	Carex lacustris			Carex	taxon	Carex lacustris	Canada	United States								Connecticut	Delaware				Idaho	Illinois	Indiana	Iowa	Kansas			Maine	Maryland	Massachusetts	Michigan	Minnesota		Missouri		Nebraska		New Hampshire	New Jersey		New York		North Dakota	Ohio
F:\AUGUST 2010 PIVOT IMAGES\MASTER TMJ\carex-lacustris-terminal-staminate-spike.jpg	#564	F:\AUGUST 2010 PIVOT IMAGES\MASTER TMJ\carex-lacustris-terminal-staminate-spike.jpg	2010-08-02 17:11:35	C:\January 2011 GLOSS PIVOT DEPLOY TESTS\JAN 04 2011\REAL A-10\A10_files\images\carex-lacustris-terminal-staminate-spike.xml	Carex lacustris			Carex	taxon	Carex lacustris	Canada	United States								Connecticut	Delaware				Idaho	Illinois	Indiana	Iowa	Kansas			Maine	Maryland	Massachusetts	Michigan	Minnesota		Missouri		Nebraska		New Hampshire	New Jersey		New York		North Dakota	Ohio
F:\AUGUST 2010 PIVOT IMAGES\MASTER TMJ\carex-laevivaginata20070602_0130.jpg	#565	F:\AUGUST 2010 PIVOT IMAGES\MASTER TMJ\carex-laevivaginata20070602_0130.jpg	2010-08-02 17:11:35	C:\January 2011 GLOSS PIVOT DEPLOY TESTS\JAN 04 2011\REAL A-10\A10_files\images\carex-laevivaginata20070602_0130.xml	Carex laevivaginata			Carex	taxon	Carex laevivaginata	Canada	United States		Alabama			Arkansas			Connecticut	Delaware	Florida	Georgia			Illinois	Indiana	Iowa		Kentucky		Maine	Maryland	Massachusetts	Michigan	Minnesota	Mississippi	Missouri					New Jersey		New York	North Carolina		Ohio	Oklahoma
F:\AUGUST 2010 PIVOT IMAGES\MASTER TMJ\carex-laevivaginata20070602_0131.jpg	#566	F:\AUGUST 2010 PIVOT IMAGES\MASTER TMJ\carex-laevivaginata20070602_0131.jpg	2010-08-02 17:11:35	C:\January 2011 GLOSS PIVOT DEPLOY TESTS\JAN 04 2011\REAL A-10\A10_files\images\carex-laevivaginata20070602_0131.xml	Carex laevivaginata			Carex	taxon	Carex laevivaginata	Canada	United States		Alabama			Arkansas			Connecticut	Delaware	Florida	Georgia			Illinois	Indiana	Iowa		Kentucky		Maine	Maryland	Massachusetts	Michigan	Minnesota	Mississippi	Missouri					New Jersey		New York	North Carolina		Ohio	Oklahoma
F:\AUGUST 2010 PIVOT IMAGES\MASTER TMJ\carex-laevivaginata20070602_0141.jpg	#567	F:\AUGUST 2010 PIVOT IMAGES\MASTER TMJ\carex-laevivaginata20070602_0141.jpg	2010-08-02 17:11:35	C:\January 2011 GLOSS PIVOT DEPLOY TESTS\JAN 04 2011\REAL A-10\A10_files\images\carex-laevivaginata20070602_0141.xml	Carex laevivaginata			Carex	taxon	Carex laevivaginata	Canada	United States		Alabama			Arkansas			Connecticut	Delaware	Florida	Georgia			Illinois	Indiana	Iowa		Kentucky		Maine	Maryland	Massachusetts	Michigan	Minnesota	Mississippi	Missouri					New Jersey		New York	North Carolina		Ohio	Oklahoma
F:\AUGUST 2010 PIVOT IMAGES\MASTER TMJ\carex-laevivaginata20070602_0145.jpg	#568	F:\AUGUST 2010 PIVOT IMAGES\MASTER TMJ\carex-laevivaginata20070602_0145.jpg	2010-08-02 17:11:35	C:\January 2011 GLOSS PIVOT DEPLOY TESTS\JAN 04 2011\REAL A-10\A10_files\images\carex-laevivaginata20070602_0145.xml	Carex laevivaginata			Carex	taxon	Carex laevivaginata	Canada	United States		Alabama			Arkansas			Connecticut	Delaware	Florida	Georgia			Illinois	Indiana	Iowa		Kentucky		Maine	Maryland	Massachusetts	Michigan	Minnesota	Mississippi	Missouri					New Jersey		New York	North Carolina		Ohio	Oklahoma
F:\AUGUST 2010 PIVOT IMAGES\MASTER TMJ\carex-laevivaginata20070602_0158.jpg	#569	F:\AUGUST 2010 PIVOT IMAGES\MASTER TMJ\carex-laevivaginata20070602_0158.jpg	2010-08-02 17:11:35	C:\January 2011 GLOSS PIVOT DEPLOY TESTS\JAN 04 2011\REAL A-10\A10_files\images\carex-laevivaginata20070602_0158.xml	Carex laevivaginata			Carex	taxon	Carex laevivaginata	Canada	United States		Alabama			Arkansas			Connecticut	Delaware	Florida	Georgia			Illinois	Indiana	Iowa		Kentucky		Maine	Maryland	Massachusetts	Michigan	Minnesota	Mississippi	Missouri					New Jersey		New York	North Carolina		Ohio	Oklahoma
F:\AUGUST 2010 PIVOT IMAGES\MASTER TMJ\carex-laevivaginata20070609_0160.JPG	#570	F:\AUGUST 2010 PIVOT IMAGES\MASTER TMJ\carex-laevivaginata20070609_0160.JPG	2010-09-20 12:29:16	C:\January 2011 GLOSS PIVOT DEPLOY TESTS\JAN 04 2011\REAL A-10\A10_files\images\carex-laevivaginata20070609_0160.xml	Carex laevivaginata			Carex	taxon	Carex laevivaginata	Canada	United States		Alabama			Arkansas			Connecticut	Delaware	Florida	Georgia			Illinois	Indiana	Iowa		Kentucky		Maine	Maryland	Massachusetts	Michigan	Minnesota	Mississippi	Missouri					New Jersey		New York	North Carolina		Ohio	Oklahoma
F:\AUGUST 2010 PIVOT IMAGES\MASTER TMJ\carex-laevivaginata20070616_0151.JPG	#571	F:\AUGUST 2010 PIVOT IMAGES\MASTER TMJ\carex-laevivaginata20070616_0151.JPG	2010-08-02 17:11:35	C:\January 2011 GLOSS PIVOT DEPLOY TESTS\JAN 04 2011\REAL A-10\A10_files\images\carex-laevivaginata20070616_0151.xml	Carex laevivaginata			Carex	taxon	Carex laevivaginata	Canada	United States		Alabama			Arkansas			Connecticut	Delaware	Florida	Georgia			Illinois	Indiana	Iowa		Kentucky		Maine	Maryland	Massachusetts	Michigan	Minnesota	Mississippi	Missouri					New Jersey		New York	North Carolina		Ohio	Oklahoma
F:\AUGUST 2010 PIVOT IMAGES\MASTER TMJ\carex-laevivaginata-inflorescence-tmj.jpg	#572	F:\AUGUST 2010 PIVOT IMAGES\MASTER TMJ\carex-laevivaginata-inflorescence-tmj.jpg	2010-08-02 17:11:35	C:\January 2011 GLOSS PIVOT DEPLOY TESTS\JAN 04 2011\REAL A-10\A10_files\images\carex-laevivaginata-inflorescence-tmj.xml	Carex laevivaginata			Carex	taxon	Carex laevivaginata	Canada	United States		Alabama			Arkansas			Connecticut	Delaware	Florida	Georgia			Illinois	Indiana	Iowa		Kentucky		Maine	Maryland	Massachusetts	Michigan	Minnesota	Mississippi	Missouri					New Jersey		New York	North Carolina		Ohio	Oklahoma
F:\AUGUST 2010 PIVOT IMAGES\MASTER TMJ\carex-laxiflora (6).JPG	#573	F:\AUGUST 2010 PIVOT IMAGES\MASTER TMJ\carex-laxiflora (6).JPG	2010-08-02 17:11:35	C:\January 2011 GLOSS PIVOT DEPLOY TESTS\JAN 04 2011\REAL A-10\A10_files\images\carex-laxiflora(6).xml	Carex laxiflora			Carex	taxon	Carex laxiflora	Canada	United States	Mexico	Alabama			Arkansas			Connecticut		Florida	Georgia			Illinois	Indiana			Kentucky	Louisiana	Maine	Maryland	Massachusetts	Michigan	Minnesota	Mississippi					New Hampshire	New Jersey		New York	North Carolina		Ohio	Oklahoma
F:\AUGUST 2010 PIVOT IMAGES\MASTER TMJ\carex-laxiflora (8).JPG	#574	F:\AUGUST 2010 PIVOT IMAGES\MASTER TMJ\carex-laxiflora (8).JPG	2010-09-20 12:32:03	C:\January 2011 GLOSS PIVOT DEPLOY TESTS\JAN 04 2011\REAL A-10\A10_files\images\carex-laxiflora(8).xml	Carex laxiflora			Carex	taxon	Carex laxiflora	Canada	United States	Mexico	Alabama			Arkansas			Connecticut		Florida	Georgia			Illinois	Indiana			Kentucky	Louisiana	Maine	Maryland	Massachusetts	Michigan	Minnesota	Mississippi					New Hampshire	New Jersey		New York	North Carolina		Ohio	Oklahoma
F:\AUGUST 2010 PIVOT IMAGES\MASTER TMJ\carex-laxiflora (9).JPG	#575	F:\AUGUST 2010 PIVOT IMAGES\MASTER TMJ\carex-laxiflora (9).JPG	2010-08-02 17:11:35	C:\January 2011 GLOSS PIVOT DEPLOY TESTS\JAN 04 2011\REAL A-10\A10_files\images\carex-laxiflora(9).xml	Carex laxiflora			Carex	taxon	Carex laxiflora	Canada	United States	Mexico	Alabama			Arkansas			Connecticut		Florida	Georgia			Illinois	Indiana			Kentucky	Louisiana	Maine	Maryland	Massachusetts	Michigan	Minnesota	Mississippi					New Hampshire	New Jersey		New York	North Carolina		Ohio	Oklahoma
F:\AUGUST 2010 PIVOT IMAGES\MASTER TMJ\carex-laxiflora (12).JPG	#576	F:\AUGUST 2010 PIVOT IMAGES\MASTER TMJ\carex-laxiflora (12).JPG	2010-08-02 17:11:35	C:\January 2011 GLOSS PIVOT DEPLOY TESTS\JAN 04 2011\REAL A-10\A10_files\images\carex-laxiflora(12).xml	Carex laxiflora			Carex	taxon	Carex laxiflora	Canada	United States	Mexico	Alabama			Arkansas			Connecticut		Florida	Georgia			Illinois	Indiana			Kentucky	Louisiana	Maine	Maryland	Massachusetts	Michigan	Minnesota	Mississippi					New Hampshire	New Jersey		New York	North Carolina		Ohio	Oklahoma
F:\AUGUST 2010 PIVOT IMAGES\MASTER TMJ\carex-laxiflora-20070519_0291.JPG	#577	F:\AUGUST 2010 PIVOT IMAGES\MASTER TMJ\carex-laxiflora-20070519_0291.JPG	2010-08-02 17:11:35	C:\January 2011 GLOSS PIVOT DEPLOY TESTS\JAN 04 2011\REAL A-10\A10_files\images\carex-laxiflora-20070519_0291.xml	Carex laxiflora			Carex	taxon	Carex laxiflora	Canada	United States	Mexico	Alabama			Arkansas			Connecticut		Florida	Georgia			Illinois	Indiana			Kentucky	Louisiana	Maine	Maryland	Massachusetts	Michigan	Minnesota	Mississippi					New Hampshire	New Jersey		New York	North Carolina		Ohio	Oklahoma
F:\AUGUST 2010 PIVOT IMAGES\MASTER TMJ\carex-leavenworthii-inflorescence.jpg	#578	F:\AUGUST 2010 PIVOT IMAGES\MASTER TMJ\carex-leavenworthii-inflorescence.jpg	2010-08-02 17:11:35	C:\January 2011 GLOSS PIVOT DEPLOY TESTS\JAN 04 2011\REAL A-10\A10_files\images\carex-leavenworthii-inflorescence.xml	Carex leavenworthii			Carex	taxon	Carex leavenworthii	Canada	United States		Alabama			Arkansas	California		Connecticut	Delaware	Florida	Georgia				Indiana	Iowa	Kansas	Kentucky	Louisiana		Maryland		Michigan		Mississippi	Missouri		Nebraska			New Jersey		New York	North Carolina		Ohio	Oklahoma
F:\AUGUST 2010 PIVOT IMAGES\MASTER TMJ\carex-leavenworthii-inflorescence-anthesis.jpg	#579	F:\AUGUST 2010 PIVOT IMAGES\MASTER TMJ\carex-leavenworthii-inflorescence-anthesis.jpg	2010-08-02 17:11:35	C:\January 2011 GLOSS PIVOT DEPLOY TESTS\JAN 04 2011\REAL A-10\A10_files\images\carex-leavenworthii-inflorescence-anthesis.xml	Carex leavenworthii			Carex	taxon	Carex leavenworthii	Canada	United States		Alabama			Arkansas	California		Connecticut	Delaware	Florida	Georgia				Indiana	Iowa	Kansas	Kentucky	Louisiana		Maryland		Michigan		Mississippi	Missouri		Nebraska			New Jersey		New York	North Carolina		Ohio	Oklahoma
F:\AUGUST 2010 PIVOT IMAGES\MASTER TMJ\carex-leptalea-habit.jpg	#580	F:\AUGUST 2010 PIVOT IMAGES\MASTER TMJ\carex-leptalea-habit.jpg	2010-08-02 17:11:35	C:\January 2011 GLOSS PIVOT DEPLOY TESTS\JAN 04 2011\REAL A-10\A10_files\images\carex-leptalea-habit.xml	Carex leptalea			Carex	taxon	Carex leptalea	Canada	United States	Mexico	Alabama	Alaska		Arkansas	California	Colorado	Connecticut	Delaware	Florida	Georgia		Idaho	Illinois	Indiana	Iowa		Kentucky	Louisiana	Maine	Maryland	Massachusetts	Michigan	Minnesota	Mississippi	Missouri	Montana			New Hampshire	New Jersey	New Mexico	New York	North Carolina	North Dakota	Ohio	Oklahoma
F:\AUGUST 2010 PIVOT IMAGES\MASTER TMJ\carex-leptalea-habit-2.jpg	#581	F:\AUGUST 2010 PIVOT IMAGES\MASTER TMJ\carex-leptalea-habit-2.jpg	2010-08-02 17:11:35	C:\January 2011 GLOSS PIVOT DEPLOY TESTS\JAN 04 2011\REAL A-10\A10_files\images\carex-leptalea-habit-2.xml	Carex leptalea			Carex	taxon	Carex leptalea	Canada	United States	Mexico	Alabama	Alaska		Arkansas	California	Colorado	Connecticut	Delaware	Florida	Georgia		Idaho	Illinois	Indiana	Iowa		Kentucky	Louisiana	Maine	Maryland	Massachusetts	Michigan	Minnesota	Mississippi	Missouri	Montana			New Hampshire	New Jersey	New Mexico	New York	North Carolina	North Dakota	Ohio	Oklahoma
F:\AUGUST 2010 PIVOT IMAGES\MASTER TMJ\carex-leptalea-inflorescence.jpg	#582	F:\AUGUST 2010 PIVOT IMAGES\MASTER TMJ\carex-leptalea-inflorescence.jpg	2010-08-02 17:11:35	C:\January 2011 GLOSS PIVOT DEPLOY TESTS\JAN 04 2011\REAL A-10\A10_files\images\carex-leptalea-inflorescence.xml	Carex leptalea			Carex	taxon	Carex leptalea	Canada	United States	Mexico	Alabama	Alaska		Arkansas	California	Colorado	Connecticut	Delaware	Florida	Georgia		Idaho	Illinois	Indiana	Iowa		Kentucky	Louisiana	Maine	Maryland	Massachusetts	Michigan	Minnesota	Mississippi	Missouri	Montana			New Hampshire	New Jersey	New Mexico	New York	North Carolina	North Dakota	Ohio	Oklahoma
F:\AUGUST 2010 PIVOT IMAGES\MASTER TMJ\carex-lonchocarpa-inflorescence.jpg	#583	F:\AUGUST 2010 PIVOT IMAGES\MASTER TMJ\carex-lonchocarpa-inflorescence.jpg	2010-08-02 17:11:35	C:\January 2011 GLOSS PIVOT DEPLOY TESTS\JAN 04 2011\REAL A-10\A10_files\images\carex-lonchocarpa-inflorescence.xml	Carex lonchocarpa			Carex	taxon	Carex lonchocarpa		United States			Alaska						Delaware	Florida	Georgia								Louisiana		Maryland				Mississippi									North Carolina
F:\AUGUST 2010 PIVOT IMAGES\MASTER TMJ\carex-lonchocarpa-lateral-spikes.jpg	#584	F:\AUGUST 2010 PIVOT IMAGES\MASTER TMJ\carex-lonchocarpa-lateral-spikes.jpg	2010-08-02 17:11:35	C:\January 2011 GLOSS PIVOT DEPLOY TESTS\JAN 04 2011\REAL A-10\A10_files\images\carex-lonchocarpa-lateral-spikes.xml	Carex lonchocarpa			Carex	taxon	Carex lonchocarpa		United States			Alaska						Delaware	Florida	Georgia								Louisiana		Maryland				Mississippi									North Carolina
F:\AUGUST 2010 PIVOT IMAGES\MASTER TMJ\carex-lonchocarpa-with-rhynchospora.jpg	#585	F:\AUGUST 2010 PIVOT IMAGES\MASTER TMJ\carex-lonchocarpa-with-rhynchospora.jpg	2010-08-02 17:11:35	C:\January 2011 GLOSS PIVOT DEPLOY TESTS\JAN 04 2011\REAL A-10\A10_files\images\carex-lonchocarpa-with-rhynchospora.xml	Carex lonchocarpa			Carex	taxon	Carex lonchocarpa		United States			Alaska						Delaware	Florida	Georgia								Louisiana		Maryland				Mississippi									North Carolina
F:\AUGUST 2010 PIVOT IMAGES\MASTER TMJ\carex-longii-inflorescence-anthesis.jpg	#586	F:\AUGUST 2010 PIVOT IMAGES\MASTER TMJ\carex-longii-inflorescence-anthesis.jpg	2010-08-02 17:11:35	C:\January 2011 GLOSS PIVOT DEPLOY TESTS\JAN 04 2011\REAL A-10\A10_files\images\carex-longii-inflorescence-anthesis.xml	Carex longii			Carex	taxon	Carex longii	Canada	United States	Mexico	Alabama			Arkansas				Delaware	Florida	Georgia	Hawaii		Illinois	Indiana			Kentucky	Louisiana		Maryland	Massachusetts	Michigan		Mississippi						New Jersey		New York	North Carolina		Ohio	Oklahoma
F:\AUGUST 2010 PIVOT IMAGES\MASTER TMJ\carex-longii-inflorescence-anthesis-2.jpg	#587	F:\AUGUST 2010 PIVOT IMAGES\MASTER TMJ\carex-longii-inflorescence-anthesis-2.jpg	2010-08-02 17:11:35	C:\January 2011 GLOSS PIVOT DEPLOY TESTS\JAN 04 2011\REAL A-10\A10_files\images\carex-longii-inflorescence-anthesis-2.xml	Carex longii			Carex	taxon	Carex longii	Canada	United States	Mexico	Alabama			Arkansas				Delaware	Florida	Georgia	Hawaii		Illinois	Indiana			Kentucky	Louisiana		Maryland	Massachusetts	Michigan		Mississippi						New Jersey		New York	North Carolina		Ohio	Oklahoma
F:\AUGUST 2010 PIVOT IMAGES\MASTER TMJ\carex-louisianica-habit-(2).jpg	#588	F:\AUGUST 2010 PIVOT IMAGES\MASTER TMJ\carex-louisianica-habit-(2).jpg	2010-08-02 17:11:35	C:\January 2011 GLOSS PIVOT DEPLOY TESTS\JAN 04 2011\REAL A-10\A10_files\images\carex-louisianica-habit-(2).xml	Carex louisianica			Carex	taxon	Carex louisianica		United States		Alabama			Arkansas				Delaware	Florida	Georgia			Illinois	Indiana			Kentucky	Louisiana		Maryland				Mississippi		Montana				New Jersey					Ohio	Oklahoma
F:\AUGUST 2010 PIVOT IMAGES\MASTER TMJ\carex-louisianica-habitat.jpg	#589	F:\AUGUST 2010 PIVOT IMAGES\MASTER TMJ\carex-louisianica-habitat.jpg	2010-08-02 17:11:35	C:\January 2011 GLOSS PIVOT DEPLOY TESTS\JAN 04 2011\REAL A-10\A10_files\images\carex-louisianica-habitat.xml	Carex louisianica			Carex	taxon	Carex louisianica		United States		Alabama			Arkansas				Delaware	Florida	Georgia			Illinois	Indiana			Kentucky	Louisiana		Maryland				Mississippi		Montana				New Jersey					Ohio	Oklahoma
F:\AUGUST 2010 PIVOT IMAGES\MASTER TMJ\carex-louisianica-habit-rhizomatous.jpg	#590	F:\AUGUST 2010 PIVOT IMAGES\MASTER TMJ\carex-louisianica-habit-rhizomatous.jpg	2010-08-02 17:11:35	C:\January 2011 GLOSS PIVOT DEPLOY TESTS\JAN 04 2011\REAL A-10\A10_files\images\carex-louisianica-habit-rhizomatous.xml	Carex louisianica			Carex	taxon	Carex louisianica		United States		Alabama			Arkansas				Delaware	Florida	Georgia			Illinois	Indiana			Kentucky	Louisiana		Maryland				Mississippi		Montana				New Jersey					Ohio	Oklahoma
F:\AUGUST 2010 PIVOT IMAGES\MASTER TMJ\carex-louisianica-inflorescence.jpg	#591	F:\AUGUST 2010 PIVOT IMAGES\MASTER TMJ\carex-louisianica-inflorescence.jpg	2010-08-02 17:11:35	C:\January 2011 GLOSS PIVOT DEPLOY TESTS\JAN 04 2011\REAL A-10\A10_files\images\carex-louisianica-inflorescence.xml	Carex louisianica			Carex	taxon	Carex louisianica		United States		Alabama			Arkansas				Delaware	Florida	Georgia			Illinois	Indiana			Kentucky	Louisiana		Maryland				Mississippi		Montana				New Jersey					Ohio	Oklahoma
F:\AUGUST 2010 PIVOT IMAGES\MASTER TMJ\carex-louisianica-perigynia-40-times.jpg	#592	F:\AUGUST 2010 PIVOT IMAGES\MASTER TMJ\carex-louisianica-perigynia-40-times.jpg	2010-08-02 17:11:35	C:\January 2011 GLOSS PIVOT DEPLOY TESTS\JAN 04 2011\REAL A-10\A10_files\images\carex-louisianica-perigynia-40-times.xml	Carex louisianica			Carex	taxon	Carex louisianica		United States		Alabama			Arkansas				Delaware	Florida	Georgia			Illinois	Indiana			Kentucky	Louisiana		Maryland				Mississippi		Montana				New Jersey					Ohio	Oklahoma
F:\AUGUST 2010 PIVOT IMAGES\MASTER TMJ\carex-lupuliformis-anthesis-(2).jpg	#593	F:\AUGUST 2010 PIVOT IMAGES\MASTER TMJ\carex-lupuliformis-anthesis-(2).jpg	2010-08-02 17:11:35	C:\January 2011 GLOSS PIVOT DEPLOY TESTS\JAN 04 2011\REAL A-10\A10_files\images\carex-lupuliformis-anthesis-(2).xml	Carex lupuliformis			Carex	taxon	Carex lupuliformis	Canada	United States					Arkansas			Connecticut	Delaware	Florida	Georgia			Illinois	Indiana	Iowa		Kentucky	Louisiana	Maine	Maryland		Michigan	Minnesota		Missouri					New Jersey		New York	North Carolina		Ohio
F:\AUGUST 2010 PIVOT IMAGES\MASTER TMJ\carex-lupuliformis-anthesis.jpg	#594	F:\AUGUST 2010 PIVOT IMAGES\MASTER TMJ\carex-lupuliformis-anthesis.jpg	2010-08-02 17:11:35	C:\January 2011 GLOSS PIVOT DEPLOY TESTS\JAN 04 2011\REAL A-10\A10_files\images\carex-lupuliformis-anthesis.xml	Carex lupuliformis			Carex	taxon	Carex lupuliformis	Canada	United States					Arkansas			Connecticut	Delaware	Florida	Georgia			Illinois	Indiana	Iowa		Kentucky	Louisiana	Maine	Maryland		Michigan	Minnesota		Missouri					New Jersey		New York	North Carolina		Ohio
F:\AUGUST 2010 PIVOT IMAGES\MASTER TMJ\carex-lupuliformis-habit-2.jpg	#595	F:\AUGUST 2010 PIVOT IMAGES\MASTER TMJ\carex-lupuliformis-habit-2.jpg	2010-08-02 17:11:35	C:\January 2011 GLOSS PIVOT DEPLOY TESTS\JAN 04 2011\REAL A-10\A10_files\images\carex-lupuliformis-habit-2.xml	Carex lupuliformis			Carex	taxon	Carex lupuliformis	Canada	United States					Arkansas			Connecticut	Delaware	Florida	Georgia			Illinois	Indiana	Iowa		Kentucky	Louisiana	Maine	Maryland		Michigan	Minnesota		Missouri					New Jersey		New York	North Carolina		Ohio
F:\AUGUST 2010 PIVOT IMAGES\MASTER TMJ\carex-lupulina20040729_0187.JPG	#596	F:\AUGUST 2010 PIVOT IMAGES\MASTER TMJ\carex-lupulina20040729_0187.JPG	2010-08-02 17:11:35	C:\January 2011 GLOSS PIVOT DEPLOY TESTS\JAN 04 2011\REAL A-10\A10_files\images\carex-lupulina20040729_0187.xml	Carex lupulina			Carex	taxon	Carex lupulina	Canada	United States		Alabama			Arkansas			Connecticut		Florida	Georgia			Illinois	Indiana	Iowa	Kansas	Kentucky	Louisiana	Maine	Maryland	Massachusetts	Michigan	Minnesota	Mississippi	Missouri		Nebraska		New Hampshire	New Jersey		New York	North Carolina		Ohio	Oklahoma
F:\AUGUST 2010 PIVOT IMAGES\MASTER TMJ\carex-lupulina20070706_0169.JPG	#597	F:\AUGUST 2010 PIVOT IMAGES\MASTER TMJ\carex-lupulina20070706_0169.JPG	2010-08-02 17:11:35	C:\January 2011 GLOSS PIVOT DEPLOY TESTS\JAN 04 2011\REAL A-10\A10_files\images\carex-lupulina20070706_0169.xml	Carex lupulina			Carex	taxon	Carex lupulina	Canada	United States		Alabama			Arkansas			Connecticut		Florida	Georgia			Illinois	Indiana	Iowa	Kansas	Kentucky	Louisiana	Maine	Maryland	Massachusetts	Michigan	Minnesota	Mississippi	Missouri		Nebraska		New Hampshire	New Jersey		New York	North Carolina		Ohio	Oklahoma
F:\AUGUST 2010 PIVOT IMAGES\MASTER TMJ\carex-lupulina20070706_0177.JPG	#598	F:\AUGUST 2010 PIVOT IMAGES\MASTER TMJ\carex-lupulina20070706_0177.JPG	2010-09-20 12:32:47	C:\January 2011 GLOSS PIVOT DEPLOY TESTS\JAN 04 2011\REAL A-10\A10_files\images\carex-lupulina20070706_0177.xml	Carex lupulina			Carex	taxon	Carex lupulina	Canada	United States		Alabama			Arkansas			Connecticut		Florida	Georgia			Illinois	Indiana	Iowa	Kansas	Kentucky	Louisiana	Maine	Maryland	Massachusetts	Michigan	Minnesota	Mississippi	Missouri		Nebraska		New Hampshire	New Jersey		New York	North Carolina		Ohio	Oklahoma
F:\AUGUST 2010 PIVOT IMAGES\MASTER TMJ\carex-lupulina20080420_0182.JPG	#599	F:\AUGUST 2010 PIVOT IMAGES\MASTER TMJ\carex-lupulina20080420_0182.JPG	2010-08-02 17:11:35	C:\January 2011 GLOSS PIVOT DEPLOY TESTS\JAN 04 2011\REAL A-10\A10_files\images\carex-lupulina20080420_0182.xml	Carex lupulina			Carex	taxon	Carex lupulina	Canada	United States		Alabama			Arkansas			Connecticut		Florida	Georgia			Illinois	Indiana	Iowa	Kansas	Kentucky	Louisiana	Maine	Maryland	Massachusetts	Michigan	Minnesota	Mississippi	Missouri		Nebraska		New Hampshire	New Jersey		New York	North Carolina		Ohio	Oklahoma
F:\AUGUST 2010 PIVOT IMAGES\MASTER TMJ\carex-lupulina20080425_0164.JPG	#600	F:\AUGUST 2010 PIVOT IMAGES\MASTER TMJ\carex-lupulina20080425_0164.JPG	2010-08-02 17:11:35	C:\January 2011 GLOSS PIVOT DEPLOY TESTS\JAN 04 2011\REAL A-10\A10_files\images\carex-lupulina20080425_0164.xml	Carex lupulina			Carex	taxon	Carex lupulina	Canada	United States		Alabama			Arkansas			Connecticut		Florida	Georgia			Illinois	Indiana	Iowa	Kansas	Kentucky	Louisiana	Maine	Maryland	Massachusetts	Michigan	Minnesota	Mississippi	Missouri		Nebraska		New Hampshire	New Jersey		New York	North Carolina		Ohio	Oklahoma
F:\AUGUST 2010 PIVOT IMAGES\MASTER TMJ\carex-lurida-habit.jpg	#601	F:\AUGUST 2010 PIVOT IMAGES\MASTER TMJ\carex-lurida-habit.jpg	2010-08-02 17:11:35	C:\January 2011 GLOSS PIVOT DEPLOY TESTS\JAN 04 2011\REAL A-10\A10_files\images\carex-lurida-habit.xml	Carex lurida			Carex	taxon	Carex lurida	Canada	United States	Mexico	Alabama			Arkansas			Connecticut	Delaware	Florida	Georgia			Illinois	Indiana	Iowa		Kentucky	Louisiana	Maine	Maryland	Massachusetts	Michigan	Minnesota	Mississippi	Missouri				New Hampshire	New Jersey		New York	North Carolina		Ohio	Oklahoma
F:\AUGUST 2010 PIVOT IMAGES\MASTER TMJ\carex-lurida-lateral-pistillate-spike.jpg	#602	F:\AUGUST 2010 PIVOT IMAGES\MASTER TMJ\carex-lurida-lateral-pistillate-spike.jpg	2010-08-02 17:11:35	C:\January 2011 GLOSS PIVOT DEPLOY TESTS\JAN 04 2011\REAL A-10\A10_files\images\carex-lurida-lateral-pistillate-spike.xml	Carex lurida			Carex	taxon	Carex lurida	Canada	United States	Mexico	Alabama			Arkansas			Connecticut	Delaware	Florida	Georgia			Illinois	Indiana	Iowa		Kentucky	Louisiana	Maine	Maryland	Massachusetts	Michigan	Minnesota	Mississippi	Missouri				New Hampshire	New Jersey		New York	North Carolina		Ohio	Oklahoma
F:\AUGUST 2010 PIVOT IMAGES\MASTER TMJ\carex-lurida-lateral-pistillate-spikes.jpg	#603	F:\AUGUST 2010 PIVOT IMAGES\MASTER TMJ\carex-lurida-lateral-pistillate-spikes.jpg	2010-08-02 17:11:35	C:\January 2011 GLOSS PIVOT DEPLOY TESTS\JAN 04 2011\REAL A-10\A10_files\images\carex-lurida-lateral-pistillate-spikes.xml	Carex lurida			Carex	taxon	Carex lurida	Canada	United States	Mexico	Alabama			Arkansas			Connecticut	Delaware	Florida	Georgia			Illinois	Indiana	Iowa		Kentucky	Louisiana	Maine	Maryland	Massachusetts	Michigan	Minnesota	Mississippi	Missouri				New Hampshire	New Jersey		New York	North Carolina		Ohio	Oklahoma
F:\AUGUST 2010 PIVOT IMAGES\MASTER TMJ\carex-lurida-streamside.jpg	#604	F:\AUGUST 2010 PIVOT IMAGES\MASTER TMJ\carex-lurida-streamside.jpg	2010-08-02 17:11:35	C:\January 2011 GLOSS PIVOT DEPLOY TESTS\JAN 04 2011\REAL A-10\A10_files\images\carex-lurida-streamside.xml	Carex lurida			Carex	taxon	Carex lurida	Canada	United States	Mexico	Alabama			Arkansas			Connecticut	Delaware	Florida	Georgia			Illinois	Indiana	Iowa		Kentucky	Louisiana	Maine	Maryland	Massachusetts	Michigan	Minnesota	Mississippi	Missouri				New Hampshire	New Jersey		New York	North Carolina		Ohio	Oklahoma
F:\AUGUST 2010 PIVOT IMAGES\MASTER TMJ\carex-mitchelliana-inflorescence.jpg	#605	F:\AUGUST 2010 PIVOT IMAGES\MASTER TMJ\carex-mitchelliana-inflorescence.jpg	2010-08-02 17:11:35	C:\January 2011 GLOSS PIVOT DEPLOY TESTS\JAN 04 2011\REAL A-10\A10_files\images\carex-mitchelliana-inflorescence.xml	Carex mitchelliana			Carex	taxon	Carex mitchelliana		United States		Alabama							Delaware	Florida	Georgia							Kentucky			Maryland	Massachusetts			Mississippi						New Jersey		New York	North Carolina		Ohio
F:\AUGUST 2010 PIVOT IMAGES\MASTER TMJ\carex-mitchelliana-lateral-spikes.jpg	#606	F:\AUGUST 2010 PIVOT IMAGES\MASTER TMJ\carex-mitchelliana-lateral-spikes.jpg	2010-08-02 17:11:35	C:\January 2011 GLOSS PIVOT DEPLOY TESTS\JAN 04 2011\REAL A-10\A10_files\images\carex-mitchelliana-lateral-spikes.xml	Carex mitchelliana			Carex	taxon	Carex mitchelliana		United States		Alabama							Delaware	Florida	Georgia							Kentucky			Maryland	Massachusetts			Mississippi						New Jersey		New York	North Carolina		Ohio
F:\AUGUST 2010 PIVOT IMAGES\MASTER TMJ\carex-mitchelliana-spike.jpg	#607	F:\AUGUST 2010 PIVOT IMAGES\MASTER TMJ\carex-mitchelliana-spike.jpg	2010-08-02 17:11:35	C:\January 2011 GLOSS PIVOT DEPLOY TESTS\JAN 04 2011\REAL A-10\A10_files\images\carex-mitchelliana-spike.xml	Carex mitchelliana			Carex	taxon	Carex mitchelliana		United States		Alabama							Delaware	Florida	Georgia							Kentucky			Maryland	Massachusetts			Mississippi						New Jersey		New York	North Carolina		Ohio
F:\AUGUST 2010 PIVOT IMAGES\MASTER TMJ\carex-mitchelliana-terminal-spike.jpg	#608	F:\AUGUST 2010 PIVOT IMAGES\MASTER TMJ\carex-mitchelliana-terminal-spike.jpg	2010-08-02 17:11:35	C:\January 2011 GLOSS PIVOT DEPLOY TESTS\JAN 04 2011\REAL A-10\A10_files\images\carex-mitchelliana-terminal-spike.xml	Carex mitchelliana			Carex	taxon	Carex mitchelliana		United States		Alabama							Delaware	Florida	Georgia							Kentucky			Maryland	Massachusetts			Mississippi						New Jersey		New York	North Carolina		Ohio
F:\AUGUST 2010 PIVOT IMAGES\MASTER TMJ\carex-molesta-inflorescencejpg.jpg	#609	F:\AUGUST 2010 PIVOT IMAGES\MASTER TMJ\carex-molesta-inflorescencejpg.jpg	2010-06-29 20:28:31	C:\January 2011 GLOSS PIVOT DEPLOY TESTS\JAN 04 2011\REAL A-10\A10_files\images\carex-molesta-inflorescencejpg.xml	Carex molesta			Carex	taxon	Carex molesta	Canada	United States		Alabama			Arkansas	California		Connecticut						Illinois	Indiana	Iowa	Kansas	Kentucky			Maryland	Massachusetts	Michigan	Minnesota	Mississippi	Missouri		Nebraska		New Hampshire			New York		North Dakota	Ohio	Oklahoma
F:\AUGUST 2010 PIVOT IMAGES\MASTER TMJ\carex-molesta-maturity.jpg	#610	F:\AUGUST 2010 PIVOT IMAGES\MASTER TMJ\carex-molesta-maturity.jpg	2010-08-02 17:11:38	C:\January 2011 GLOSS PIVOT DEPLOY TESTS\JAN 04 2011\REAL A-10\A10_files\images\carex-molesta-maturity.xml	Carex molesta			Carex	taxon	Carex molesta	Canada	United States		Alabama			Arkansas	California		Connecticut						Illinois	Indiana	Iowa	Kansas	Kentucky			Maryland	Massachusetts	Michigan	Minnesota	Mississippi	Missouri		Nebraska		New Hampshire			New York		North Dakota	Ohio	Oklahoma
F:\AUGUST 2010 PIVOT IMAGES\MASTER TMJ\carex-molesta-pre-anthesis.jpg	#611	F:\AUGUST 2010 PIVOT IMAGES\MASTER TMJ\carex-molesta-pre-anthesis.jpg	2010-06-29 20:28:31	C:\January 2011 GLOSS PIVOT DEPLOY TESTS\JAN 04 2011\REAL A-10\A10_files\images\carex-molesta-pre-anthesis.xml	Carex molesta			Carex	taxon	Carex molesta	Canada	United States		Alabama			Arkansas	California		Connecticut						Illinois	Indiana	Iowa	Kansas	Kentucky			Maryland	Massachusetts	Michigan	Minnesota	Mississippi	Missouri		Nebraska		New Hampshire			New York		North Dakota	Ohio	Oklahoma
F:\AUGUST 2010 PIVOT IMAGES\MASTER TMJ\carex-molesta-terminal-gynecandrous-spike.jpg	#612	F:\AUGUST 2010 PIVOT IMAGES\MASTER TMJ\carex-molesta-terminal-gynecandrous-spike.jpg	2010-06-29 20:28:31	C:\January 2011 GLOSS PIVOT DEPLOY TESTS\JAN 04 2011\REAL A-10\A10_files\images\carex-molesta-terminal-gynecandrous-spike.xml	Carex molesta			Carex	taxon	Carex molesta	Canada	United States		Alabama			Arkansas	California		Connecticut						Illinois	Indiana	Iowa	Kansas	Kentucky			Maryland	Massachusetts	Michigan	Minnesota	Mississippi	Missouri		Nebraska		New Hampshire			New York		North Dakota	Ohio	Oklahoma
F:\AUGUST 2010 PIVOT IMAGES\MASTER TMJ\carex-molesta-with-bug.JPG	#613	F:\AUGUST 2010 PIVOT IMAGES\MASTER TMJ\carex-molesta-with-bug.JPG	2009-06-02 20:55:08	C:\January 2011 GLOSS PIVOT DEPLOY TESTS\JAN 04 2011\REAL A-10\A10_files\images\carex-molesta-with-bug.xml	Carex molesta			Carex	taxon	Carex molesta	Canada	United States		Alabama			Arkansas	California		Connecticut						Illinois	Indiana	Iowa	Kansas	Kentucky			Maryland	Massachusetts	Michigan	Minnesota	Mississippi	Missouri		Nebraska		New Hampshire			New York		North Dakota	Ohio	Oklahoma
F:\AUGUST 2010 PIVOT IMAGES\MASTER TMJ\carex-muehlenbergii-habit.jpg	#614	F:\AUGUST 2010 PIVOT IMAGES\MASTER TMJ\carex-muehlenbergii-habit.jpg	2010-08-02 17:11:35	C:\January 2011 GLOSS PIVOT DEPLOY TESTS\JAN 04 2011\REAL A-10\A10_files\images\carex-muehlenbergii-habit.xml	Carex bicknellii			Carex	taxon	Carex bicknellii	Canada	United States					Arkansas			Connecticut						Illinois	Indiana	Iowa	Kansas					Massachusetts	Michigan	Minnesota	Mississippi	Missouri		Nebraska		New Hampshire	New Jersey		New York			Ohio	Oklahoma
F:\AUGUST 2010 PIVOT IMAGES\MASTER TMJ\carex-muehlenbergii-habit-2.jpg	#615	F:\AUGUST 2010 PIVOT IMAGES\MASTER TMJ\carex-muehlenbergii-habit-2.jpg	2010-08-02 17:11:35	C:\January 2011 GLOSS PIVOT DEPLOY TESTS\JAN 04 2011\REAL A-10\A10_files\images\carex-muehlenbergii-habit-2.xml	Carex bicknellii			Carex	taxon	Carex bicknellii	Canada	United States					Arkansas			Connecticut						Illinois	Indiana	Iowa	Kansas					Massachusetts	Michigan	Minnesota	Mississippi	Missouri		Nebraska		New Hampshire	New Jersey		New York			Ohio	Oklahoma
F:\AUGUST 2010 PIVOT IMAGES\MASTER TMJ\carex-muehlenbergii-habit-3.jpg	#616	F:\AUGUST 2010 PIVOT IMAGES\MASTER TMJ\carex-muehlenbergii-habit-3.jpg	2010-08-02 17:11:35	C:\January 2011 GLOSS PIVOT DEPLOY TESTS\JAN 04 2011\REAL A-10\A10_files\images\carex-muehlenbergii-habit-3.xml	Carex muehlenbergii			Carex	taxon	Carex muehlenbergii	Canada	United States		Alabama			Arkansas			Connecticut	Delaware	Florida	Georgia			Illinois	Indiana	Iowa	Kansas	Kentucky	Louisiana	Maine	Maryland	Massachusetts	Michigan	Minnesota	Mississippi	Missouri				New Hampshire	New Jersey		New York	North Carolina		Ohio	Oklahoma
F:\AUGUST 2010 PIVOT IMAGES\MASTER TMJ\carex-muehlenbergii-inflorescense.jpg	#617	F:\AUGUST 2010 PIVOT IMAGES\MASTER TMJ\carex-muehlenbergii-inflorescense.jpg	2010-08-02 17:11:35	C:\January 2011 GLOSS PIVOT DEPLOY TESTS\JAN 04 2011\REAL A-10\A10_files\images\carex-muehlenbergii-inflorescense.xml	Carex bicknellii			Carex	taxon	Carex bicknellii	Canada	United States					Arkansas			Connecticut						Illinois	Indiana	Iowa	Kansas					Massachusetts	Michigan	Minnesota	Mississippi	Missouri		Nebraska		New Hampshire	New Jersey		New York			Ohio	Oklahoma
F:\AUGUST 2010 PIVOT IMAGES\MASTER TMJ\carex-muskingumensis-inflorescence.jpg	#618	F:\AUGUST 2010 PIVOT IMAGES\MASTER TMJ\carex-muskingumensis-inflorescence.jpg	2010-08-02 17:11:34	C:\January 2011 GLOSS PIVOT DEPLOY TESTS\JAN 04 2011\REAL A-10\A10_files\images\carex-muskingumensis-inflorescence.xml	Carex muskingumensis			Carex	taxon	Carex muskingumensis	Canada	United States					Arkansas									Illinois	Indiana	Iowa	Kansas	Kentucky					Michigan	Minnesota		Missouri										Ohio	Oklahoma
F:\AUGUST 2010 PIVOT IMAGES\MASTER TMJ\carex-muskingumensis-inflorescence-3.jpg	#619	F:\AUGUST 2010 PIVOT IMAGES\MASTER TMJ\carex-muskingumensis-inflorescence-3.jpg	2010-08-02 17:11:34	C:\January 2011 GLOSS PIVOT DEPLOY TESTS\JAN 04 2011\REAL A-10\A10_files\images\carex-muskingumensis-inflorescence-3.xml	Carex muskingumensis			Carex	taxon	Carex muskingumensis	Canada	United States					Arkansas									Illinois	Indiana	Iowa	Kansas	Kentucky					Michigan	Minnesota		Missouri										Ohio	Oklahoma
F:\AUGUST 2010 PIVOT IMAGES\MASTER TMJ\carex-nebrascensis-habit.jpg	#620	F:\AUGUST 2010 PIVOT IMAGES\MASTER TMJ\carex-nebrascensis-habit.jpg	2010-08-02 17:11:34	C:\January 2011 GLOSS PIVOT DEPLOY TESTS\JAN 04 2011\REAL A-10\A10_files\images\carex-nebrascensis-habit.xml	Carex nebrascensis			Carex	taxon	Carex nebrascensis	Canada	United States				Arizona		California	Colorado						Idaho	Illinois			Kansas									Missouri	Montana	Nebraska	Nevada			New Mexico			North Dakota
F:\AUGUST 2010 PIVOT IMAGES\MASTER TMJ\carex-nebrascensis-habit-along-seep.jpg	#621	F:\AUGUST 2010 PIVOT IMAGES\MASTER TMJ\carex-nebrascensis-habit-along-seep.jpg	2010-08-02 17:11:34	C:\January 2011 GLOSS PIVOT DEPLOY TESTS\JAN 04 2011\REAL A-10\A10_files\images\carex-nebrascensis-habit-along-seep.xml	Carex nebrascensis			Carex	taxon	Carex nebrascensis	Canada	United States				Arizona		California	Colorado						Idaho	Illinois			Kansas									Missouri	Montana	Nebraska	Nevada			New Mexico			North Dakota
F:\AUGUST 2010 PIVOT IMAGES\MASTER TMJ\carex-nebrascensis-habitat-2.jpg	#622	F:\AUGUST 2010 PIVOT IMAGES\MASTER TMJ\carex-nebrascensis-habitat-2.jpg	2010-08-02 17:11:34	C:\January 2011 GLOSS PIVOT DEPLOY TESTS\JAN 04 2011\REAL A-10\A10_files\images\carex-nebrascensis-habitat-2.xml	Carex nebrascensis			Carex	taxon	Carex nebrascensis	Canada	United States				Arizona		California	Colorado						Idaho	Illinois			Kansas									Missouri	Montana	Nebraska	Nevada			New Mexico			North Dakota
F:\AUGUST 2010 PIVOT IMAGES\MASTER TMJ\carex-nebrascensis-habitat-3.jpg	#623	F:\AUGUST 2010 PIVOT IMAGES\MASTER TMJ\carex-nebrascensis-habitat-3.jpg	2010-08-02 17:11:34	C:\January 2011 GLOSS PIVOT DEPLOY TESTS\JAN 04 2011\REAL A-10\A10_files\images\carex-nebrascensis-habitat-3.xml	Carex nebrascensis			Carex	taxon	Carex nebrascensis	Canada	United States				Arizona		California	Colorado						Idaho	Illinois			Kansas									Missouri	Montana	Nebraska	Nevada			New Mexico			North Dakota
F:\AUGUST 2010 PIVOT IMAGES\MASTER TMJ\carex-nebrascensis-inflorescence.jpg	#624	F:\AUGUST 2010 PIVOT IMAGES\MASTER TMJ\carex-nebrascensis-inflorescence.jpg	2010-08-02 17:11:34	C:\January 2011 GLOSS PIVOT DEPLOY TESTS\JAN 04 2011\REAL A-10\A10_files\images\carex-nebrascensis-inflorescence.xml	Carex nebrascensis			Carex	taxon	Carex nebrascensis	Canada	United States				Arizona		California	Colorado						Idaho	Illinois			Kansas									Missouri	Montana	Nebraska	Nevada			New Mexico			North Dakota
F:\AUGUST 2010 PIVOT IMAGES\MASTER TMJ\carex-oligosperma-achene-micro.jpg	#625	F:\AUGUST 2010 PIVOT IMAGES\MASTER TMJ\carex-oligosperma-achene-micro.jpg	2010-08-02 17:11:34	C:\January 2011 GLOSS PIVOT DEPLOY TESTS\JAN 04 2011\REAL A-10\A10_files\images\carex-oligosperma-achene-micro.xml	Carex oligosperma			Carex	taxon	Carex oligosperma	Canada	United States								Connecticut						Illinois	Indiana					Maine		Massachusetts	Michigan	Minnesota						New Hampshire			New York	North Carolina		Ohio
F:\AUGUST 2010 PIVOT IMAGES\MASTER TMJ\carex-oligosperma-lateral-pistillate-spike.jpg	#626	F:\AUGUST 2010 PIVOT IMAGES\MASTER TMJ\carex-oligosperma-lateral-pistillate-spike.jpg	2010-08-02 17:11:34	C:\January 2011 GLOSS PIVOT DEPLOY TESTS\JAN 04 2011\REAL A-10\A10_files\images\carex-oligosperma-lateral-pistillate-spike.xml	Carex oligosperma			Carex	taxon	Carex oligosperma	Canada	United States								Connecticut						Illinois	Indiana					Maine		Massachusetts	Michigan	Minnesota						New Hampshire			New York	North Carolina		Ohio
F:\AUGUST 2010 PIVOT IMAGES\MASTER TMJ\carex-oligosperma-lateral-pistillate-spike-habit.jpg	#627	F:\AUGUST 2010 PIVOT IMAGES\MASTER TMJ\carex-oligosperma-lateral-pistillate-spike-habit.jpg	2010-08-02 17:11:34	C:\January 2011 GLOSS PIVOT DEPLOY TESTS\JAN 04 2011\REAL A-10\A10_files\images\carex-oligosperma-lateral-pistillate-spike-habit.xml	Carex oligosperma			Carex	taxon	Carex oligosperma	Canada	United States								Connecticut						Illinois	Indiana					Maine		Massachusetts	Michigan	Minnesota						New Hampshire			New York	North Carolina		Ohio
F:\AUGUST 2010 PIVOT IMAGES\MASTER TMJ\carex-oligosperma-perigynia-micro.jpg	#628	F:\AUGUST 2010 PIVOT IMAGES\MASTER TMJ\carex-oligosperma-perigynia-micro.jpg	2010-08-02 17:11:34	C:\January 2011 GLOSS PIVOT DEPLOY TESTS\JAN 04 2011\REAL A-10\A10_files\images\carex-oligosperma-perigynia-micro.xml	Carex oligosperma			Carex	taxon	Carex oligosperma	Canada	United States								Connecticut						Illinois	Indiana					Maine		Massachusetts	Michigan	Minnesota						New Hampshire			New York	North Carolina		Ohio
F:\AUGUST 2010 PIVOT IMAGES\MASTER TMJ\carex-oligosperma-spike-habitat.jpg	#629	F:\AUGUST 2010 PIVOT IMAGES\MASTER TMJ\carex-oligosperma-spike-habitat.jpg	2010-08-02 17:11:34	C:\January 2011 GLOSS PIVOT DEPLOY TESTS\JAN 04 2011\REAL A-10\A10_files\images\carex-oligosperma-spike-habitat.xml	Carex oligosperma			Carex	taxon	Carex oligosperma	Canada	United States								Connecticut						Illinois	Indiana					Maine		Massachusetts	Michigan	Minnesota						New Hampshire			New York	North Carolina		Ohio
F:\AUGUST 2010 PIVOT IMAGES\MASTER TMJ\carex-oligosperma-spike-micro.jpg	#630	F:\AUGUST 2010 PIVOT IMAGES\MASTER TMJ\carex-oligosperma-spike-micro.jpg	2010-08-02 17:11:34	C:\January 2011 GLOSS PIVOT DEPLOY TESTS\JAN 04 2011\REAL A-10\A10_files\images\carex-oligosperma-spike-micro.xml	Carex oligosperma			Carex	taxon	Carex oligosperma	Canada	United States								Connecticut						Illinois	Indiana					Maine		Massachusetts	Michigan	Minnesota						New Hampshire			New York	North Carolina		Ohio
F:\AUGUST 2010 PIVOT IMAGES\MASTER TMJ\carex-oxylepis-gynecandrous-terminal-spike.jpg	#631	F:\AUGUST 2010 PIVOT IMAGES\MASTER TMJ\carex-oxylepis-gynecandrous-terminal-spike.jpg	2010-08-02 17:11:34	C:\January 2011 GLOSS PIVOT DEPLOY TESTS\JAN 04 2011\REAL A-10\A10_files\images\carex-oxylepis-gynecandrous-terminal-spike.xml	Carex oxylepis			Carex	taxon	Carex oxylepis		United States		Alabama			Arkansas					Florida	Georgia			Illinois				Kentucky	Louisiana						Mississippi	Missouri								North Carolina			Oklahoma
F:\AUGUST 2010 PIVOT IMAGES\MASTER TMJ\carex-oxylepis-inflorescence.jpg	#632	F:\AUGUST 2010 PIVOT IMAGES\MASTER TMJ\carex-oxylepis-inflorescence.jpg	2010-08-02 17:11:34	C:\January 2011 GLOSS PIVOT DEPLOY TESTS\JAN 04 2011\REAL A-10\A10_files\images\carex-oxylepis-inflorescence.xml	Carex oxylepis			Carex	taxon	Carex oxylepis		United States		Alabama			Arkansas					Florida	Georgia			Illinois				Kentucky	Louisiana						Mississippi	Missouri								North Carolina			Oklahoma
F:\AUGUST 2010 PIVOT IMAGES\MASTER TMJ\carex-oxylepis-inflorescence-preanthesis.jpg	#633	F:\AUGUST 2010 PIVOT IMAGES\MASTER TMJ\carex-oxylepis-inflorescence-preanthesis.jpg	2010-08-02 17:11:34	C:\January 2011 GLOSS PIVOT DEPLOY TESTS\JAN 04 2011\REAL A-10\A10_files\images\carex-oxylepis-inflorescence-preanthesis.xml	Carex oxylepis			Carex	taxon	Carex oxylepis		United States		Alabama			Arkansas					Florida	Georgia			Illinois				Kentucky	Louisiana						Mississippi	Missouri								North Carolina			Oklahoma
F:\AUGUST 2010 PIVOT IMAGES\MASTER TMJ\carex-pellita-habit.jpg	#634	F:\AUGUST 2010 PIVOT IMAGES\MASTER TMJ\carex-pellita-habit.jpg	2010-08-02 17:11:34	C:\January 2011 GLOSS PIVOT DEPLOY TESTS\JAN 04 2011\REAL A-10\A10_files\images\carex-pellita-habit.xml	Carex pellita			Carex	taxon	Carex pellita	Canada	United States	Mexico			Arizona		California	Colorado	Connecticut	Delaware				Idaho	Illinois	Indiana	Iowa	Kansas	Kentucky		Maine	Maryland	Massachusetts	Michigan	Minnesota		Missouri	Montana	Nebraska	Nevada	New Hampshire	New Jersey	New Mexico	New York		North Dakota	Ohio	Oklahoma
F:\AUGUST 2010 PIVOT IMAGES\MASTER TMJ\carex-pellita-lateral-pistillate-spike-HDR.jpg	#635	F:\AUGUST 2010 PIVOT IMAGES\MASTER TMJ\carex-pellita-lateral-pistillate-spike-HDR.jpg	2010-08-02 17:11:34	C:\January 2011 GLOSS PIVOT DEPLOY TESTS\JAN 04 2011\REAL A-10\A10_files\images\carex-pellita-lateral-pistillate-spike-HDR.xml	Carex pellita			Carex	taxon	Carex pellita	Canada	United States	Mexico			Arizona		California	Colorado	Connecticut	Delaware				Idaho	Illinois	Indiana	Iowa	Kansas	Kentucky		Maine	Maryland	Massachusetts	Michigan	Minnesota		Missouri	Montana	Nebraska	Nevada	New Hampshire	New Jersey	New Mexico	New York		North Dakota	Ohio	Oklahoma
F:\AUGUST 2010 PIVOT IMAGES\MASTER TMJ\carex-plantaginea-habit-summer-flush.jpg	#636	F:\AUGUST 2010 PIVOT IMAGES\MASTER TMJ\carex-plantaginea-habit-summer-flush.jpg	2010-08-02 17:11:34	C:\January 2011 GLOSS PIVOT DEPLOY TESTS\JAN 04 2011\REAL A-10\A10_files\images\carex-plantaginea-habit-summer-flush.xml	Carex plantaginea			Carex	taxon	Carex plantaginea	Canada	United States		Alabama						Connecticut			Georgia			Illinois	Indiana	Iowa		Kentucky		Maine	Maryland	Massachusetts	Michigan	Minnesota						New Hampshire	New Jersey		New York	North Carolina		Ohio
F:\AUGUST 2010 PIVOT IMAGES\MASTER TMJ\carex-plantaginea-pistillate-spike.jpg	#637	F:\AUGUST 2010 PIVOT IMAGES\MASTER TMJ\carex-plantaginea-pistillate-spike.jpg	2010-08-02 17:11:34	C:\January 2011 GLOSS PIVOT DEPLOY TESTS\JAN 04 2011\REAL A-10\A10_files\images\carex-plantaginea-pistillate-spike.xml	Carex plantaginea			Carex	taxon	Carex plantaginea	Canada	United States		Alabama						Connecticut			Georgia			Illinois	Indiana	Iowa		Kentucky		Maine	Maryland	Massachusetts	Michigan	Minnesota						New Hampshire	New Jersey		New York	North Carolina		Ohio
F:\AUGUST 2010 PIVOT IMAGES\MASTER TMJ\carex-plantaginea-pistillate-spike-anthesis.jpg	#638	F:\AUGUST 2010 PIVOT IMAGES\MASTER TMJ\carex-plantaginea-pistillate-spike-anthesis.jpg	2010-08-02 17:11:34	C:\January 2011 GLOSS PIVOT DEPLOY TESTS\JAN 04 2011\REAL A-10\A10_files\images\carex-plantaginea-pistillate-spike-anthesis.xml	Carex plantaginea			Carex	taxon	Carex plantaginea	Canada	United States		Alabama						Connecticut			Georgia			Illinois	Indiana	Iowa		Kentucky		Maine	Maryland	Massachusetts	Michigan	Minnesota						New Hampshire	New Jersey		New York	North Carolina		Ohio
F:\AUGUST 2010 PIVOT IMAGES\MASTER TMJ\carex-praegracilis-habitat.jpg	#639	F:\AUGUST 2010 PIVOT IMAGES\MASTER TMJ\carex-praegracilis-habitat.jpg	2010-08-02 17:11:34	C:\January 2011 GLOSS PIVOT DEPLOY TESTS\JAN 04 2011\REAL A-10\A10_files\images\carex-praegracilis-habitat.xml	Carex praegracilis			Carex	taxon	Carex praegracilis	Canada	United States	Mexico		Alaska	Arizona		California	Colorado	Connecticut	Delaware				Idaho	Illinois	Indiana	Iowa	Kansas	Kentucky		Maine			Michigan	Minnesota		Missouri	Montana	Nebraska	Nevada			New Mexico	New York		North Dakota	Ohio	Oklahoma
F:\AUGUST 2010 PIVOT IMAGES\MASTER TMJ\carex-praegracilis-inflroescence.jpg	#640	F:\AUGUST 2010 PIVOT IMAGES\MASTER TMJ\carex-praegracilis-inflroescence.jpg	2010-08-02 17:11:34	C:\January 2011 GLOSS PIVOT DEPLOY TESTS\JAN 04 2011\REAL A-10\A10_files\images\carex-praegracilis-inflroescence.xml	Carex praegracilis			Carex	taxon	Carex praegracilis	Canada	United States	Mexico		Alaska	Arizona		California	Colorado	Connecticut	Delaware				Idaho	Illinois	Indiana	Iowa	Kansas	Kentucky		Maine			Michigan	Minnesota		Missouri	Montana	Nebraska	Nevada			New Mexico	New York		North Dakota	Ohio	Oklahoma
F:\AUGUST 2010 PIVOT IMAGES\MASTER TMJ\carex-praegracilis-inflroescence-primarily-pistillate.jpg	#641	F:\AUGUST 2010 PIVOT IMAGES\MASTER TMJ\carex-praegracilis-inflroescence-primarily-pistillate.jpg	2010-08-02 17:11:34	C:\January 2011 GLOSS PIVOT DEPLOY TESTS\JAN 04 2011\REAL A-10\A10_files\images\carex-praegracilis-inflroescence-primarily-pistillate.xml	Carex praegracilis			Carex	taxon	Carex praegracilis	Canada	United States	Mexico		Alaska	Arizona		California	Colorado	Connecticut	Delaware				Idaho	Illinois	Indiana	Iowa	Kansas	Kentucky		Maine			Michigan	Minnesota		Missouri	Montana	Nebraska	Nevada			New Mexico	New York		North Dakota	Ohio	Oklahoma
F:\AUGUST 2010 PIVOT IMAGES\MASTER TMJ\carex-prasina-anthesis.jpg	#642	F:\AUGUST 2010 PIVOT IMAGES\MASTER TMJ\carex-prasina-anthesis.jpg	2010-08-02 17:11:34	C:\January 2011 GLOSS PIVOT DEPLOY TESTS\JAN 04 2011\REAL A-10\A10_files\images\carex-prasina-anthesis.xml	Carex prasina			Carex	taxon	Carex prasina	Canada	United States		Alabama			Arkansas			Connecticut	Delaware		Georgia			Illinois	Indiana			Kentucky		Maine	Maryland	Massachusetts	Michigan		Mississippi					New Hampshire	New Jersey		New York	North Carolina		Ohio
F:\AUGUST 2010 PIVOT IMAGES\MASTER TMJ\carex-prasina-anthesis-2.jpg	#643	F:\AUGUST 2010 PIVOT IMAGES\MASTER TMJ\carex-prasina-anthesis-2.jpg	2010-08-02 17:11:34	C:\January 2011 GLOSS PIVOT DEPLOY TESTS\JAN 04 2011\REAL A-10\A10_files\images\carex-prasina-anthesis-2.xml	Carex prasina			Carex	taxon	Carex prasina	Canada	United States		Alabama			Arkansas			Connecticut	Delaware		Georgia			Illinois	Indiana			Kentucky		Maine	Maryland	Massachusetts	Michigan		Mississippi					New Hampshire	New Jersey		New York	North Carolina		Ohio
F:\AUGUST 2010 PIVOT IMAGES\MASTER TMJ\carex-prasina-anthesis-3.jpg	#644	F:\AUGUST 2010 PIVOT IMAGES\MASTER TMJ\carex-prasina-anthesis-3.jpg	2010-08-02 17:11:34	C:\January 2011 GLOSS PIVOT DEPLOY TESTS\JAN 04 2011\REAL A-10\A10_files\images\carex-prasina-anthesis-3.xml	Carex prasina			Carex	taxon	Carex prasina	Canada	United States		Alabama			Arkansas			Connecticut	Delaware		Georgia			Illinois	Indiana			Kentucky		Maine	Maryland	Massachusetts	Michigan		Mississippi					New Hampshire	New Jersey		New York	North Carolina		Ohio
F:\AUGUST 2010 PIVOT IMAGES\MASTER TMJ\carex-prasina-habit.jpg	#645	F:\AUGUST 2010 PIVOT IMAGES\MASTER TMJ\carex-prasina-habit.jpg	2010-08-02 17:11:34	C:\January 2011 GLOSS PIVOT DEPLOY TESTS\JAN 04 2011\REAL A-10\A10_files\images\carex-prasina-habit.xml	Carex prasina			Carex	taxon	Carex prasina	Canada	United States		Alabama			Arkansas			Connecticut	Delaware		Georgia			Illinois	Indiana			Kentucky		Maine	Maryland	Massachusetts	Michigan		Mississippi					New Hampshire	New Jersey		New York	North Carolina		Ohio
F:\AUGUST 2010 PIVOT IMAGES\MASTER TMJ\carex-prasina-habit-3.jpg	#646	F:\AUGUST 2010 PIVOT IMAGES\MASTER TMJ\carex-prasina-habit-3.jpg	2010-08-02 17:11:34	C:\January 2011 GLOSS PIVOT DEPLOY TESTS\JAN 04 2011\REAL A-10\A10_files\images\carex-prasina-habit-3.xml	Carex prasina			Carex	taxon	Carex prasina	Canada	United States		Alabama			Arkansas			Connecticut	Delaware		Georgia			Illinois	Indiana			Kentucky		Maine	Maryland	Massachusetts	Michigan		Mississippi					New Hampshire	New Jersey		New York	North Carolina		Ohio
F:\AUGUST 2010 PIVOT IMAGES\MASTER TMJ\carex-pseudocyperus-inflorescence.jpg	#647	F:\AUGUST 2010 PIVOT IMAGES\MASTER TMJ\carex-pseudocyperus-inflorescence.jpg	2010-08-02 17:11:34	C:\January 2011 GLOSS PIVOT DEPLOY TESTS\JAN 04 2011\REAL A-10\A10_files\images\carex-pseudocyperus-inflorescence.xml	Carex pseudocyperus			Carex	taxon	Carex pseudocyperus	Canada	United States	Mexico							Connecticut							Indiana							Massachusetts	Michigan	Minnesota							New Jersey		New York		North Dakota	Ohio
F:\AUGUST 2010 PIVOT IMAGES\MASTER TMJ\carex-pseudocyperus-lateral-spikes.jpg	#648	F:\AUGUST 2010 PIVOT IMAGES\MASTER TMJ\carex-pseudocyperus-lateral-spikes.jpg	2010-08-02 17:11:34	C:\January 2011 GLOSS PIVOT DEPLOY TESTS\JAN 04 2011\REAL A-10\A10_files\images\carex-pseudocyperus-lateral-spikes.xml	Carex pseudocyperus			Carex	taxon	Carex pseudocyperus	Canada	United States	Mexico							Connecticut							Indiana							Massachusetts	Michigan	Minnesota							New Jersey		New York		North Dakota	Ohio
F:\AUGUST 2010 PIVOT IMAGES\MASTER TMJ\carex-raynoldsii-tmj.jpg	#649	F:\AUGUST 2010 PIVOT IMAGES\MASTER TMJ\carex-raynoldsii-tmj.jpg	2010-08-02 17:11:34	C:\January 2011 GLOSS PIVOT DEPLOY TESTS\JAN 04 2011\REAL A-10\A10_files\images\carex-raynoldsii-tmj.xml	Carex raynoldsii			Carex	taxon	Carex raynoldsii	Canada	United States						California	Colorado						Idaho														Montana		Nevada
F:\AUGUST 2010 PIVOT IMAGES\MASTER TMJ\carex-raynoldsii-habitat.jpg	#650	F:\AUGUST 2010 PIVOT IMAGES\MASTER TMJ\carex-raynoldsii-habitat.jpg	2010-08-02 17:11:34	C:\January 2011 GLOSS PIVOT DEPLOY TESTS\JAN 04 2011\REAL A-10\A10_files\images\carex-raynoldsii-habitat.xml	Carex raynoldsii			Carex	taxon	Carex raynoldsii	Canada	United States						California	Colorado						Idaho														Montana		Nevada
F:\AUGUST 2010 PIVOT IMAGES\MASTER TMJ\carex-raynoldsii-inflroescence-3.jpg	#651	F:\AUGUST 2010 PIVOT IMAGES\MASTER TMJ\carex-raynoldsii-inflroescence-3.jpg	2010-08-02 17:11:34	C:\January 2011 GLOSS PIVOT DEPLOY TESTS\JAN 04 2011\REAL A-10\A10_files\images\carex-raynoldsii-inflroescence-3.xml	Carex raynoldsii			Carex	taxon	Carex raynoldsii	Canada	United States						California	Colorado						Idaho														Montana		Nevada
F:\AUGUST 2010 PIVOT IMAGES\MASTER TMJ\carex-reniformis-habitat.JPG	#652	F:\AUGUST 2010 PIVOT IMAGES\MASTER TMJ\carex-reniformis-habitat.JPG	2010-08-02 17:11:34	C:\January 2011 GLOSS PIVOT DEPLOY TESTS\JAN 04 2011\REAL A-10\A10_files\images\carex-reniformis-habitat.xml	Carex reniformis			Carex	taxon	Carex reniformis		United States		Alabama			Arkansas					Florida	Georgia			Illinois				Kentucky	Louisiana						Mississippi	Missouri								North Carolina			Oklahoma
F:\AUGUST 2010 PIVOT IMAGES\MASTER TMJ\carex-reniformis-inflorescence.jpg	#653	F:\AUGUST 2010 PIVOT IMAGES\MASTER TMJ\carex-reniformis-inflorescence.jpg	2010-08-02 17:11:34	C:\January 2011 GLOSS PIVOT DEPLOY TESTS\JAN 04 2011\REAL A-10\A10_files\images\carex-reniformis-inflorescence.xml	Carex reniformis			Carex	taxon	Carex reniformis		United States		Alabama			Arkansas					Florida	Georgia			Illinois				Kentucky	Louisiana						Mississippi	Missouri								North Carolina			Oklahoma
F:\AUGUST 2010 PIVOT IMAGES\MASTER TMJ\carex-reniformis-inflorescence2.jpg	#654	F:\AUGUST 2010 PIVOT IMAGES\MASTER TMJ\carex-reniformis-inflorescence2.jpg	2010-08-02 17:11:34	C:\January 2011 GLOSS PIVOT DEPLOY TESTS\JAN 04 2011\REAL A-10\A10_files\images\carex-reniformis-inflorescence2.xml	Carex reniformis			Carex	taxon	Carex reniformis		United States		Alabama			Arkansas					Florida	Georgia			Illinois				Kentucky	Louisiana						Mississippi	Missouri								North Carolina			Oklahoma
F:\AUGUST 2010 PIVOT IMAGES\MASTER TMJ\carex-rosea-inflorescence.jpg	#655	F:\AUGUST 2010 PIVOT IMAGES\MASTER TMJ\carex-rosea-inflorescence.jpg	2010-08-02 17:11:34	C:\January 2011 GLOSS PIVOT DEPLOY TESTS\JAN 04 2011\REAL A-10\A10_files\images\carex-rosea-inflorescence.xml	Carex rosea			Carex	taxon	Carex rosea	Canada	United States		Alabama			Arkansas			Connecticut	Delaware	Florida	Georgia			Illinois	Indiana	Iowa	Kansas	Kentucky		Maine	Maryland	Massachusetts	Michigan	Minnesota	Mississippi	Missouri		Nebraska		New Hampshire	New Jersey		New York	North Carolina	North Dakota	Ohio	Oklahoma
F:\AUGUST 2010 PIVOT IMAGES\MASTER TMJ\carex-scoparia 20070609_0189.JPG	#656	F:\AUGUST 2010 PIVOT IMAGES\MASTER TMJ\carex-scoparia 20070609_0189.JPG	2010-08-02 17:11:34	C:\January 2011 GLOSS PIVOT DEPLOY TESTS\JAN 04 2011\REAL A-10\A10_files\images\carex-scoparia20070609_0189.xml	Carex scoparia			Carex	taxon	Carex scoparia	Canada	United States		Alabama		Arizona	Arkansas	California	Colorado	Connecticut	Delaware		Georgia		Idaho	Illinois	Indiana	Iowa	Kansas	Kentucky	Louisiana	Maine	Maryland	Massachusetts	Michigan	Minnesota	Mississippi	Missouri	Montana	Nebraska		New Hampshire	New Jersey	New Mexico	New York	North Carolina	North Dakota	Ohio	Oklahoma
F:\AUGUST 2010 PIVOT IMAGES\MASTER TMJ\carex-scoparia 20070609_0190.JPG	#657	F:\AUGUST 2010 PIVOT IMAGES\MASTER TMJ\carex-scoparia 20070609_0190.JPG	2010-08-02 17:11:34	C:\January 2011 GLOSS PIVOT DEPLOY TESTS\JAN 04 2011\REAL A-10\A10_files\images\carex-scoparia20070609_0190.xml	Carex scoparia			Carex	taxon	Carex scoparia	Canada	United States		Alabama		Arizona	Arkansas	California	Colorado	Connecticut	Delaware		Georgia		Idaho	Illinois	Indiana	Iowa	Kansas	Kentucky	Louisiana	Maine	Maryland	Massachusetts	Michigan	Minnesota	Mississippi	Missouri	Montana	Nebraska		New Hampshire	New Jersey	New Mexico	New York	North Carolina	North Dakota	Ohio	Oklahoma
F:\AUGUST 2010 PIVOT IMAGES\MASTER TMJ\carex-scoparia-habit.jpg	#658	F:\AUGUST 2010 PIVOT IMAGES\MASTER TMJ\carex-scoparia-habit.jpg	2010-08-02 17:11:34	C:\January 2011 GLOSS PIVOT DEPLOY TESTS\JAN 04 2011\REAL A-10\A10_files\images\carex-scoparia-habit.xml	Carex scoparia			Carex	taxon	Carex scoparia	Canada	United States		Alabama		Arizona	Arkansas	California	Colorado	Connecticut	Delaware		Georgia		Idaho	Illinois	Indiana	Iowa	Kansas	Kentucky	Louisiana	Maine	Maryland	Massachusetts	Michigan	Minnesota	Mississippi	Missouri	Montana	Nebraska		New Hampshire	New Jersey	New Mexico	New York	North Carolina	North Dakota	Ohio	Oklahoma
F:\AUGUST 2010 PIVOT IMAGES\MASTER TMJ\carex-socialis-habit.jpg	#659	F:\AUGUST 2010 PIVOT IMAGES\MASTER TMJ\carex-socialis-habit.jpg	2010-05-18 20:45:19	C:\January 2011 GLOSS PIVOT DEPLOY TESTS\JAN 04 2011\REAL A-10\A10_files\images\carex-socialis-habit.xml	Carex socialis			Carex	taxon	Carex socialis		United States		Alabama			Arkansas						Georgia			Illinois	Indiana			Kentucky							Mississippi	Missouri								North Carolina			Oklahoma
F:\AUGUST 2010 PIVOT IMAGES\MASTER TMJ\carex-socialis-habit-2.jpg	#660	F:\AUGUST 2010 PIVOT IMAGES\MASTER TMJ\carex-socialis-habit-2.jpg	2010-05-18 20:46:01	C:\January 2011 GLOSS PIVOT DEPLOY TESTS\JAN 04 2011\REAL A-10\A10_files\images\carex-socialis-habit-2.xml	Carex socialis			Carex	taxon	Carex socialis		United States		Alabama			Arkansas						Georgia			Illinois	Indiana			Kentucky							Mississippi	Missouri								North Carolina			Oklahoma
F:\AUGUST 2010 PIVOT IMAGES\MASTER TMJ\carex-socialis-habitat.jpg	#661	F:\AUGUST 2010 PIVOT IMAGES\MASTER TMJ\carex-socialis-habitat.jpg	2010-05-18 20:45:37	C:\January 2011 GLOSS PIVOT DEPLOY TESTS\JAN 04 2011\REAL A-10\A10_files\images\carex-socialis-habitat.xml	Carex socialis			Carex	taxon	Carex socialis		United States		Alabama			Arkansas						Georgia			Illinois	Indiana			Kentucky							Mississippi	Missouri								North Carolina			Oklahoma
F:\AUGUST 2010 PIVOT IMAGES\MASTER TMJ\carex-socialis-inflorescence.jpg	#662	F:\AUGUST 2010 PIVOT IMAGES\MASTER TMJ\carex-socialis-inflorescence.jpg	2010-08-02 17:11:34	C:\January 2011 GLOSS PIVOT DEPLOY TESTS\JAN 04 2011\REAL A-10\A10_files\images\carex-socialis-inflorescence.xml	Carex socialis			Carex	taxon	Carex socialis		United States		Alabama			Arkansas						Georgia			Illinois	Indiana			Kentucky							Mississippi	Missouri								North Carolina			Oklahoma
F:\AUGUST 2010 PIVOT IMAGES\MASTER TMJ\carex-socialis-inflorescence-2.jpg	#663	F:\AUGUST 2010 PIVOT IMAGES\MASTER TMJ\carex-socialis-inflorescence-2.jpg	2010-08-02 17:11:34	C:\January 2011 GLOSS PIVOT DEPLOY TESTS\JAN 04 2011\REAL A-10\A10_files\images\carex-socialis-inflorescence-2.xml	Carex socialis			Carex	taxon	Carex socialis		United States		Alabama			Arkansas						Georgia			Illinois	Indiana			Kentucky							Mississippi	Missouri								North Carolina			Oklahoma
F:\AUGUST 2010 PIVOT IMAGES\MASTER TMJ\carex-sparganoides-depaureate-spike.jpg	#664	F:\AUGUST 2010 PIVOT IMAGES\MASTER TMJ\carex-sparganoides-depaureate-spike.jpg	2010-08-02 17:11:34	C:\January 2011 GLOSS PIVOT DEPLOY TESTS\JAN 04 2011\REAL A-10\A10_files\images\carex-sparganoides-depaureate-spike.xml	Carex sparganioides			Carex	taxon	Carex sparganioides	Canada	United States		Alabama			Arkansas			Connecticut	Delaware		Georgia			Illinois	Indiana	Iowa	Kansas	Kentucky		Maine	Maryland	Massachusetts	Michigan	Minnesota		Missouri		Nebraska		New Hampshire	New Jersey		New York	North Carolina		Ohio
F:\AUGUST 2010 PIVOT IMAGES\MASTER TMJ\carex-sparganoides-inflorescence.JPG	#665	F:\AUGUST 2010 PIVOT IMAGES\MASTER TMJ\carex-sparganoides-inflorescence.JPG	2010-08-02 17:11:34	C:\January 2011 GLOSS PIVOT DEPLOY TESTS\JAN 04 2011\REAL A-10\A10_files\images\carex-sparganoides-inflorescence.xml	Carex sparganioides			Carex	taxon	Carex sparganioides	Canada	United States		Alabama			Arkansas			Connecticut	Delaware		Georgia			Illinois	Indiana	Iowa	Kansas	Kentucky		Maine	Maryland	Massachusetts	Michigan	Minnesota		Missouri		Nebraska		New Hampshire	New Jersey		New York	North Carolina		Ohio
F:\AUGUST 2010 PIVOT IMAGES\MASTER TMJ\carex-sparganoides-lateral-spike.jpg	#666	F:\AUGUST 2010 PIVOT IMAGES\MASTER TMJ\carex-sparganoides-lateral-spike.jpg	2010-08-02 17:11:33	C:\January 2011 GLOSS PIVOT DEPLOY TESTS\JAN 04 2011\REAL A-10\A10_files\images\carex-sparganoides-lateral-spike.xml	Carex sparganioides			Carex	taxon	Carex sparganioides	Canada	United States		Alabama			Arkansas			Connecticut	Delaware		Georgia			Illinois	Indiana	Iowa	Kansas	Kentucky		Maine	Maryland	Massachusetts	Michigan	Minnesota		Missouri		Nebraska		New Hampshire	New Jersey		New York	North Carolina		Ohio
F:\AUGUST 2010 PIVOT IMAGES\MASTER TMJ\carex-squarrosa 20040605_0229.JPG	#667	F:\AUGUST 2010 PIVOT IMAGES\MASTER TMJ\carex-squarrosa 20040605_0229.JPG	2010-08-02 17:11:33	C:\January 2011 GLOSS PIVOT DEPLOY TESTS\JAN 04 2011\REAL A-10\A10_files\images\carex-squarrosa20040605_0229.xml	Carex squarrosa			Carex	taxon	Carex squarrosa	Canada	United States		Alabama			Arkansas			Connecticut	Delaware		Georgia			Illinois	Indiana	Iowa	Kansas	Kentucky	Louisiana		Maryland		Michigan	Minnesota	Mississippi	Missouri		Nebraska			New Jersey		New York	North Carolina		Ohio	Oklahoma
F:\AUGUST 2010 PIVOT IMAGES\MASTER TMJ\carex-squarrosa 20070613_0223.JPG	#668	F:\AUGUST 2010 PIVOT IMAGES\MASTER TMJ\carex-squarrosa 20070613_0223.JPG	2010-08-02 17:11:33	C:\January 2011 GLOSS PIVOT DEPLOY TESTS\JAN 04 2011\REAL A-10\A10_files\images\carex-squarrosa20070613_0223.xml	Carex squarrosa			Carex	taxon	Carex squarrosa	Canada	United States		Alabama			Arkansas			Connecticut	Delaware		Georgia			Illinois	Indiana	Iowa	Kansas	Kentucky	Louisiana		Maryland		Michigan	Minnesota	Mississippi	Missouri		Nebraska			New Jersey		New York	North Carolina		Ohio	Oklahoma
F:\AUGUST 2010 PIVOT IMAGES\MASTER TMJ\carex-squarrosa 20070811_0221.JPG	#669	F:\AUGUST 2010 PIVOT IMAGES\MASTER TMJ\carex-squarrosa 20070811_0221.JPG	2010-08-02 17:11:33	C:\January 2011 GLOSS PIVOT DEPLOY TESTS\JAN 04 2011\REAL A-10\A10_files\images\carex-squarrosa20070811_0221.xml	Carex squarrosa			Carex	taxon	Carex squarrosa	Canada	United States		Alabama			Arkansas			Connecticut	Delaware		Georgia			Illinois	Indiana	Iowa	Kansas	Kentucky	Louisiana		Maryland		Michigan	Minnesota	Mississippi	Missouri		Nebraska			New Jersey		New York	North Carolina		Ohio	Oklahoma
F:\AUGUST 2010 PIVOT IMAGES\MASTER TMJ\carex-squarrosa-20070602_0197.jpg	#670	F:\AUGUST 2010 PIVOT IMAGES\MASTER TMJ\carex-squarrosa-20070602_0197.jpg	2010-08-02 17:11:33	C:\January 2011 GLOSS PIVOT DEPLOY TESTS\JAN 04 2011\REAL A-10\A10_files\images\carex-squarrosa-20070602_0197.xml	Carex squarrosa			Carex	taxon	Carex squarrosa	Canada	United States		Alabama			Arkansas			Connecticut	Delaware		Georgia			Illinois	Indiana	Iowa	Kansas	Kentucky	Louisiana		Maryland		Michigan	Minnesota	Mississippi	Missouri		Nebraska			New Jersey		New York	North Carolina		Ohio	Oklahoma
F:\AUGUST 2010 PIVOT IMAGES\MASTER TMJ\carex-stipata 20050525_0230.JPG	#671	F:\AUGUST 2010 PIVOT IMAGES\MASTER TMJ\carex-stipata 20050525_0230.JPG	2010-08-02 17:11:33	C:\January 2011 GLOSS PIVOT DEPLOY TESTS\JAN 04 2011\REAL A-10\A10_files\images\carex-stipata20050525_0230.xml	Carex stipata			Carex	taxon	Carex stipata	Canada	United States		Alabama	Alaska	Arizona	Arkansas	California	Colorado	Connecticut	Delaware	Florida	Georgia		Idaho	Illinois	Indiana	Iowa	Kansas	Kentucky	Louisiana	Maine	Maryland	Massachusetts	Michigan	Minnesota	Mississippi	Missouri	Montana	Nebraska		New Hampshire	New Jersey	New Mexico	New York	North Carolina	North Dakota	Ohio	Oklahoma
F:\AUGUST 2010 PIVOT IMAGES\MASTER TMJ\carex-stipata 20050525_0231.JPG	#672	F:\AUGUST 2010 PIVOT IMAGES\MASTER TMJ\carex-stipata 20050525_0231.JPG	2010-08-02 17:11:33	C:\January 2011 GLOSS PIVOT DEPLOY TESTS\JAN 04 2011\REAL A-10\A10_files\images\carex-stipata20050525_0231.xml	Carex stipata			Carex	taxon	Carex stipata	Canada	United States		Alabama	Alaska	Arizona	Arkansas	California	Colorado	Connecticut	Delaware	Florida	Georgia		Idaho	Illinois	Indiana	Iowa	Kansas	Kentucky	Louisiana	Maine	Maryland	Massachusetts	Michigan	Minnesota	Mississippi	Missouri	Montana	Nebraska		New Hampshire	New Jersey	New Mexico	New York	North Carolina	North Dakota	Ohio	Oklahoma
F:\AUGUST 2010 PIVOT IMAGES\MASTER TMJ\carex-stipata 20050525_0237.JPG	#673	F:\AUGUST 2010 PIVOT IMAGES\MASTER TMJ\carex-stipata 20050525_0237.JPG	2010-09-20 12:35:01	C:\January 2011 GLOSS PIVOT DEPLOY TESTS\JAN 04 2011\REAL A-10\A10_files\images\carex-stipata20050525_0237.xml	Carex stipata			Carex	taxon	Carex stipata	Canada	United States		Alabama	Alaska	Arizona	Arkansas	California	Colorado	Connecticut	Delaware	Florida	Georgia		Idaho	Illinois	Indiana	Iowa	Kansas	Kentucky	Louisiana	Maine	Maryland	Massachusetts	Michigan	Minnesota	Mississippi	Missouri	Montana	Nebraska		New Hampshire	New Jersey	New Mexico	New York	North Carolina	North Dakota	Ohio	Oklahoma
F:\AUGUST 2010 PIVOT IMAGES\MASTER TMJ\carex-stipata 20050525_0239.JPG	#674	F:\AUGUST 2010 PIVOT IMAGES\MASTER TMJ\carex-stipata 20050525_0239.JPG	2010-08-02 17:11:33	C:\January 2011 GLOSS PIVOT DEPLOY TESTS\JAN 04 2011\REAL A-10\A10_files\images\carex-stipata20050525_0239.xml	Carex stipata			Carex	taxon	Carex stipata	Canada	United States		Alabama	Alaska	Arizona	Arkansas	California	Colorado	Connecticut	Delaware	Florida	Georgia		Idaho	Illinois	Indiana	Iowa	Kansas	Kentucky	Louisiana	Maine	Maryland	Massachusetts	Michigan	Minnesota	Mississippi	Missouri	Montana	Nebraska		New Hampshire	New Jersey	New Mexico	New York	North Carolina	North Dakota	Ohio	Oklahoma
F:\AUGUST 2010 PIVOT IMAGES\MASTER TMJ\carex-straminea-habit.jpg	#675	F:\AUGUST 2010 PIVOT IMAGES\MASTER TMJ\carex-straminea-habit.jpg	2010-08-02 17:11:33	C:\January 2011 GLOSS PIVOT DEPLOY TESTS\JAN 04 2011\REAL A-10\A10_files\images\carex-straminea-habit.xml	Carex straminea			Carex	taxon	Carex straminea		United States								Connecticut	Delaware					Illinois	Indiana			Kentucky			Maryland	Massachusetts	Michigan			Missouri					New Jersey		New York	North Carolina		Ohio
F:\AUGUST 2010 PIVOT IMAGES\MASTER TMJ\carex-straminea-habitat.jpg	#676	F:\AUGUST 2010 PIVOT IMAGES\MASTER TMJ\carex-straminea-habitat.jpg	2010-08-02 17:11:33	C:\January 2011 GLOSS PIVOT DEPLOY TESTS\JAN 04 2011\REAL A-10\A10_files\images\carex-straminea-habitat.xml	Carex straminea			Carex	taxon	Carex straminea		United States								Connecticut	Delaware					Illinois	Indiana			Kentucky			Maryland	Massachusetts	Michigan			Missouri					New Jersey		New York	North Carolina		Ohio
F:\AUGUST 2010 PIVOT IMAGES\MASTER TMJ\carex-straminea-spikes.jpg	#677	F:\AUGUST 2010 PIVOT IMAGES\MASTER TMJ\carex-straminea-spikes.jpg	2010-08-02 17:11:33	C:\January 2011 GLOSS PIVOT DEPLOY TESTS\JAN 04 2011\REAL A-10\A10_files\images\carex-straminea-spikes.xml	Carex straminea			Carex	taxon	Carex straminea		United States								Connecticut	Delaware					Illinois	Indiana			Kentucky			Maryland	Massachusetts	Michigan			Missouri					New Jersey		New York	North Carolina		Ohio
F:\AUGUST 2010 PIVOT IMAGES\MASTER TMJ\carex-straminea-spikes-2.jpg	#678	F:\AUGUST 2010 PIVOT IMAGES\MASTER TMJ\carex-straminea-spikes-2.jpg	2010-08-02 17:11:33	C:\January 2011 GLOSS PIVOT DEPLOY TESTS\JAN 04 2011\REAL A-10\A10_files\images\carex-straminea-spikes-2.xml	Carex straminea			Carex	taxon	Carex straminea		United States								Connecticut	Delaware					Illinois	Indiana			Kentucky			Maryland	Massachusetts	Michigan			Missouri					New Jersey		New York	North Carolina		Ohio
F:\AUGUST 2010 PIVOT IMAGES\MASTER TMJ\carex-straminea-spikes-3.jpg	#679	F:\AUGUST 2010 PIVOT IMAGES\MASTER TMJ\carex-straminea-spikes-3.jpg	2010-08-02 17:11:33	C:\January 2011 GLOSS PIVOT DEPLOY TESTS\JAN 04 2011\REAL A-10\A10_files\images\carex-straminea-spikes-3.xml	Carex straminea			Carex	taxon	Carex straminea		United States								Connecticut	Delaware					Illinois	Indiana			Kentucky			Maryland	Massachusetts	Michigan			Missouri					New Jersey		New York	North Carolina		Ohio
F:\AUGUST 2010 PIVOT IMAGES\MASTER TMJ\carex-stricta 20070616_0240.JPG	#680	F:\AUGUST 2010 PIVOT IMAGES\MASTER TMJ\carex-stricta 20070616_0240.JPG	2010-08-02 17:11:33	C:\January 2011 GLOSS PIVOT DEPLOY TESTS\JAN 04 2011\REAL A-10\A10_files\images\carex-stricta20070616_0240.xml	Carex stricta			Carex	taxon	Carex stricta	Canada	United States					Arkansas			Connecticut	Delaware		Georgia			Illinois	Indiana	Iowa	Kansas	Kentucky		Maine	Maryland	Massachusetts	Michigan	Minnesota	Mississippi	Missouri		Nebraska		New Hampshire	New Jersey		New York	North Carolina	North Dakota	Ohio
F:\AUGUST 2010 PIVOT IMAGES\MASTER TMJ\carex-stricta 20070616_0243.JPG	#681	F:\AUGUST 2010 PIVOT IMAGES\MASTER TMJ\carex-stricta 20070616_0243.JPG	2010-08-02 17:11:33	C:\January 2011 GLOSS PIVOT DEPLOY TESTS\JAN 04 2011\REAL A-10\A10_files\images\carex-stricta20070616_0243.xml	Carex stricta			Carex	taxon	Carex stricta	Canada	United States					Arkansas			Connecticut	Delaware		Georgia			Illinois	Indiana	Iowa	Kansas	Kentucky		Maine	Maryland	Massachusetts	Michigan	Minnesota	Mississippi	Missouri		Nebraska		New Hampshire	New Jersey		New York	North Carolina	North Dakota	Ohio
F:\AUGUST 2010 PIVOT IMAGES\MASTER TMJ\carex-stricta 20070616_0245.JPG	#682	F:\AUGUST 2010 PIVOT IMAGES\MASTER TMJ\carex-stricta 20070616_0245.JPG	2010-08-02 17:11:33	C:\January 2011 GLOSS PIVOT DEPLOY TESTS\JAN 04 2011\REAL A-10\A10_files\images\carex-stricta20070616_0245.xml	Carex stricta			Carex	taxon	Carex stricta	Canada	United States					Arkansas			Connecticut	Delaware		Georgia			Illinois	Indiana	Iowa	Kansas	Kentucky		Maine	Maryland	Massachusetts	Michigan	Minnesota	Mississippi	Missouri		Nebraska		New Hampshire	New Jersey		New York	North Carolina	North Dakota	Ohio
F:\AUGUST 2010 PIVOT IMAGES\MASTER TMJ\carex-stricta 20070616_0246.JPG	#683	F:\AUGUST 2010 PIVOT IMAGES\MASTER TMJ\carex-stricta 20070616_0246.JPG	2010-08-02 17:11:33	C:\January 2011 GLOSS PIVOT DEPLOY TESTS\JAN 04 2011\REAL A-10\A10_files\images\carex-stricta20070616_0246.xml	Carex stricta			Carex	taxon	Carex stricta	Canada	United States					Arkansas			Connecticut	Delaware		Georgia			Illinois	Indiana	Iowa	Kansas	Kentucky		Maine	Maryland	Massachusetts	Michigan	Minnesota	Mississippi	Missouri		Nebraska		New Hampshire	New Jersey		New York	North Carolina	North Dakota	Ohio
F:\AUGUST 2010 PIVOT IMAGES\MASTER TMJ\carex-stricta-anthesis.jpg	#684	F:\AUGUST 2010 PIVOT IMAGES\MASTER TMJ\carex-stricta-anthesis.jpg	2010-08-02 17:11:33	C:\January 2011 GLOSS PIVOT DEPLOY TESTS\JAN 04 2011\REAL A-10\A10_files\images\carex-stricta-anthesis.xml	Carex stricta			Carex	taxon	Carex stricta	Canada	United States					Arkansas			Connecticut	Delaware		Georgia			Illinois	Indiana	Iowa	Kansas	Kentucky		Maine	Maryland	Massachusetts	Michigan	Minnesota	Mississippi	Missouri		Nebraska		New Hampshire	New Jersey		New York	North Carolina	North Dakota	Ohio
F:\AUGUST 2010 PIVOT IMAGES\MASTER TMJ\carex-tenax-habit.jpg	#685	F:\AUGUST 2010 PIVOT IMAGES\MASTER TMJ\carex-tenax-habit.jpg	2010-08-02 17:11:33	C:\January 2011 GLOSS PIVOT DEPLOY TESTS\JAN 04 2011\REAL A-10\A10_files\images\carex-tenax-habit.xml	Carex tenax			Carex	taxon	Carex tenax		United States		Alabama								Florida	Georgia								Louisiana						Mississippi									North Carolina
F:\AUGUST 2010 PIVOT IMAGES\MASTER TMJ\carex-tenax-habitat.jpg	#686	F:\AUGUST 2010 PIVOT IMAGES\MASTER TMJ\carex-tenax-habitat.jpg	2010-08-02 17:11:33	C:\January 2011 GLOSS PIVOT DEPLOY TESTS\JAN 04 2011\REAL A-10\A10_files\images\carex-tenax-habitat.xml	Carex tenax			Carex	taxon	Carex tenax		United States		Alabama								Florida	Georgia								Louisiana						Mississippi									North Carolina
F:\AUGUST 2010 PIVOT IMAGES\MASTER TMJ\carex-tenax-inflorescence.jpg	#687	F:\AUGUST 2010 PIVOT IMAGES\MASTER TMJ\carex-tenax-inflorescence.jpg	2010-08-02 17:11:33	C:\January 2011 GLOSS PIVOT DEPLOY TESTS\JAN 04 2011\REAL A-10\A10_files\images\carex-tenax-inflorescence.xml	Carex tenax			Carex	taxon	Carex tenax		United States		Alabama								Florida	Georgia								Louisiana						Mississippi									North Carolina
F:\AUGUST 2010 PIVOT IMAGES\MASTER TMJ\carex-tenax-inflorescence-2.jpg	#688	F:\AUGUST 2010 PIVOT IMAGES\MASTER TMJ\carex-tenax-inflorescence-2.jpg	2010-08-02 17:11:33	C:\January 2011 GLOSS PIVOT DEPLOY TESTS\JAN 04 2011\REAL A-10\A10_files\images\carex-tenax-inflorescence-2.xml	Carex tenax			Carex	taxon	Carex tenax		United States		Alabama								Florida	Georgia								Louisiana						Mississippi									North Carolina
F:\AUGUST 2010 PIVOT IMAGES\MASTER TMJ\carex-tenax-leaves.jpg	#689	F:\AUGUST 2010 PIVOT IMAGES\MASTER TMJ\carex-tenax-leaves.jpg	2010-08-02 17:11:33	C:\January 2011 GLOSS PIVOT DEPLOY TESTS\JAN 04 2011\REAL A-10\A10_files\images\carex-tenax-leaves.xml	Carex tenax			Carex	taxon	Carex tenax		United States		Alabama								Florida	Georgia								Louisiana						Mississippi									North Carolina
F:\AUGUST 2010 PIVOT IMAGES\MASTER TMJ\carex-tetanica-habit.jpg	#690	F:\AUGUST 2010 PIVOT IMAGES\MASTER TMJ\carex-tetanica-habit.jpg	2010-08-02 17:11:33	C:\January 2011 GLOSS PIVOT DEPLOY TESTS\JAN 04 2011\REAL A-10\A10_files\images\carex-tetanica-habit.xml	Carex tetanica			Carex	taxon	Carex tetanica	Canada	United States								Connecticut	Delaware					Illinois	Indiana	Iowa		Kentucky		Maine	Maryland	Massachusetts	Michigan	Minnesota		Missouri		Nebraska		New Hampshire	New Jersey		New York	North Carolina	North Dakota	Ohio
F:\AUGUST 2010 PIVOT IMAGES\MASTER TMJ\carex-tetanica-lateral-spike.jpg	#691	F:\AUGUST 2010 PIVOT IMAGES\MASTER TMJ\carex-tetanica-lateral-spike.jpg	2010-08-02 17:11:33	C:\January 2011 GLOSS PIVOT DEPLOY TESTS\JAN 04 2011\REAL A-10\A10_files\images\carex-tetanica-lateral-spike.xml	Carex tetanica			Carex	taxon	Carex tetanica	Canada	United States								Connecticut	Delaware					Illinois	Indiana	Iowa		Kentucky		Maine	Maryland	Massachusetts	Michigan	Minnesota		Missouri		Nebraska		New Hampshire	New Jersey		New York	North Carolina	North Dakota	Ohio
F:\AUGUST 2010 PIVOT IMAGES\MASTER TMJ\carex-tetanica-lateral-spike-smut.jpg	#692	F:\AUGUST 2010 PIVOT IMAGES\MASTER TMJ\carex-tetanica-lateral-spike-smut.jpg	2010-08-02 17:11:33	C:\January 2011 GLOSS PIVOT DEPLOY TESTS\JAN 04 2011\REAL A-10\A10_files\images\carex-tetanica-lateral-spike-smut.xml	Carex tetanica			Carex	taxon	Carex tetanica	Canada	United States								Connecticut	Delaware					Illinois	Indiana	Iowa		Kentucky		Maine	Maryland	Massachusetts	Michigan	Minnesota		Missouri		Nebraska		New Hampshire	New Jersey		New York	North Carolina	North Dakota	Ohio
F:\AUGUST 2010 PIVOT IMAGES\MASTER TMJ\carex-tetanica-terminal-staminate-spike.jpg	#693	F:\AUGUST 2010 PIVOT IMAGES\MASTER TMJ\carex-tetanica-terminal-staminate-spike.jpg	2010-08-02 17:11:33	C:\January 2011 GLOSS PIVOT DEPLOY TESTS\JAN 04 2011\REAL A-10\A10_files\images\carex-tetanica-terminal-staminate-spike.xml	Carex tetanica			Carex	taxon	Carex tetanica	Canada	United States								Connecticut	Delaware					Illinois	Indiana	Iowa		Kentucky		Maine	Maryland	Massachusetts	Michigan	Minnesota		Missouri		Nebraska		New Hampshire	New Jersey		New York	North Carolina	North Dakota	Ohio
F:\AUGUST 2010 PIVOT IMAGES\MASTER TMJ\carex-texensis (1).JPG	#694	F:\AUGUST 2010 PIVOT IMAGES\MASTER TMJ\carex-texensis (1).JPG	2010-08-02 17:11:33	C:\January 2011 GLOSS PIVOT DEPLOY TESTS\JAN 04 2011\REAL A-10\A10_files\images\carex-texensis(1).xml	Carex texensis			Carex	taxon	Carex texensis		United States		Alabama			Arkansas	California				Florida	Georgia						Kansas	Kentucky	Louisiana		Maryland				Mississippi	Missouri		Nebraska			New Jersey		New York	North Carolina		Ohio
F:\AUGUST 2010 PIVOT IMAGES\MASTER TMJ\carex-texensis (5).JPG	#695	F:\AUGUST 2010 PIVOT IMAGES\MASTER TMJ\carex-texensis (5).JPG	2010-08-02 17:11:33	C:\January 2011 GLOSS PIVOT DEPLOY TESTS\JAN 04 2011\REAL A-10\A10_files\images\carex-texensis(5).xml	Carex texensis			Carex	taxon	Carex texensis		United States		Alabama			Arkansas	California				Florida	Georgia						Kansas	Kentucky	Louisiana		Maryland				Mississippi	Missouri		Nebraska			New Jersey		New York	North Carolina		Ohio
F:\AUGUST 2010 PIVOT IMAGES\MASTER TMJ\carex-texensis (7).JPG	#696	F:\AUGUST 2010 PIVOT IMAGES\MASTER TMJ\carex-texensis (7).JPG	2010-08-02 17:11:33	C:\January 2011 GLOSS PIVOT DEPLOY TESTS\JAN 04 2011\REAL A-10\A10_files\images\carex-texensis(7).xml	Carex texensis			Carex	taxon	Carex texensis		United States		Alabama			Arkansas	California				Florida	Georgia						Kansas	Kentucky	Louisiana		Maryland				Mississippi	Missouri		Nebraska			New Jersey		New York	North Carolina		Ohio
F:\AUGUST 2010 PIVOT IMAGES\MASTER TMJ\carex-texensis-habit (2).jpg	#697	F:\AUGUST 2010 PIVOT IMAGES\MASTER TMJ\carex-texensis-habit (2).jpg	2010-08-02 17:11:33	C:\January 2011 GLOSS PIVOT DEPLOY TESTS\JAN 04 2011\REAL A-10\A10_files\images\carex-texensis-habit(2).xml	Carex texensis			Carex	taxon	Carex texensis		United States		Alabama			Arkansas	California				Florida	Georgia						Kansas	Kentucky	Louisiana		Maryland				Mississippi	Missouri		Nebraska			New Jersey		New York	North Carolina		Ohio
F:\AUGUST 2010 PIVOT IMAGES\MASTER TMJ\carex-texensis-habit.jpg	#698	F:\AUGUST 2010 PIVOT IMAGES\MASTER TMJ\carex-texensis-habit.jpg	2010-08-02 17:11:33	C:\January 2011 GLOSS PIVOT DEPLOY TESTS\JAN 04 2011\REAL A-10\A10_files\images\carex-texensis-habit.xml	Carex texensis			Carex	taxon	Carex texensis		United States		Alabama			Arkansas	California				Florida	Georgia						Kansas	Kentucky	Louisiana		Maryland				Mississippi	Missouri		Nebraska			New Jersey		New York	North Carolina		Ohio
F:\AUGUST 2010 PIVOT IMAGES\MASTER TMJ\carex-tribuloides-anthesis.jpg	#699	F:\AUGUST 2010 PIVOT IMAGES\MASTER TMJ\carex-tribuloides-anthesis.jpg	2010-08-02 17:11:33	C:\January 2011 GLOSS PIVOT DEPLOY TESTS\JAN 04 2011\REAL A-10\A10_files\images\carex-tribuloides-anthesis.xml	Carex tribuloides			Carex	taxon	Carex tribuloides	Canada	United States	Mexico	Alabama			Arkansas			Connecticut	Delaware	Florida	Georgia			Illinois	Indiana	Iowa	Kansas	Kentucky	Louisiana	Maine	Maryland	Massachusetts	Michigan	Minnesota	Mississippi	Missouri		Nebraska		New Hampshire	New Jersey		New York	North Carolina		Ohio	Oklahoma
F:\AUGUST 2010 PIVOT IMAGES\MASTER TMJ\carex-tribuloides-habit-2.jpg	#700	F:\AUGUST 2010 PIVOT IMAGES\MASTER TMJ\carex-tribuloides-habit-2.jpg	2010-08-02 17:11:33	C:\January 2011 GLOSS PIVOT DEPLOY TESTS\JAN 04 2011\REAL A-10\A10_files\images\carex-tribuloides-habit-2.xml	Carex tribuloides			Carex	taxon	Carex tribuloides	Canada	United States	Mexico	Alabama			Arkansas			Connecticut	Delaware	Florida	Georgia			Illinois	Indiana	Iowa	Kansas	Kentucky	Louisiana	Maine	Maryland	Massachusetts	Michigan	Minnesota	Mississippi	Missouri		Nebraska		New Hampshire	New Jersey		New York	North Carolina		Ohio	Oklahoma
F:\AUGUST 2010 PIVOT IMAGES\MASTER TMJ\carex-trisperma-habit.jpg	#701	F:\AUGUST 2010 PIVOT IMAGES\MASTER TMJ\carex-trisperma-habit.jpg	2010-08-02 17:11:33	C:\January 2011 GLOSS PIVOT DEPLOY TESTS\JAN 04 2011\REAL A-10\A10_files\images\carex-trisperma-habit.xml	Carex trisperma			Carex	taxon	Carex trisperma	Canada	United States								Connecticut	Delaware					Illinois	Indiana					Maine	Maryland	Massachusetts	Michigan	Minnesota						New Hampshire	New Jersey		New York	North Carolina		Ohio
F:\AUGUST 2010 PIVOT IMAGES\MASTER TMJ\carex-trisperma-inflorescence2.jpg	#702	F:\AUGUST 2010 PIVOT IMAGES\MASTER TMJ\carex-trisperma-inflorescence2.jpg	2010-08-02 17:11:33	C:\January 2011 GLOSS PIVOT DEPLOY TESTS\JAN 04 2011\REAL A-10\A10_files\images\carex-trisperma-inflorescence2.xml	Carex trisperma			Carex	taxon	Carex trisperma	Canada	United States								Connecticut	Delaware					Illinois	Indiana					Maine	Maryland	Massachusetts	Michigan	Minnesota						New Hampshire	New Jersey		New York	North Carolina		Ohio
F:\AUGUST 2010 PIVOT IMAGES\MASTER TMJ\carex-trisperma-inflorescence-3.jpg	#703	F:\AUGUST 2010 PIVOT IMAGES\MASTER TMJ\carex-trisperma-inflorescence-3.jpg	2010-08-02 17:11:33	C:\January 2011 GLOSS PIVOT DEPLOY TESTS\JAN 04 2011\REAL A-10\A10_files\images\carex-trisperma-inflorescence-3.xml	Carex trisperma			Carex	taxon	Carex trisperma	Canada	United States								Connecticut	Delaware					Illinois	Indiana					Maine	Maryland	Massachusetts	Michigan	Minnesota						New Hampshire	New Jersey		New York	North Carolina		Ohio
F:\AUGUST 2010 PIVOT IMAGES\MASTER TMJ\carex-tuckermannii-habit.jpg	#704	F:\AUGUST 2010 PIVOT IMAGES\MASTER TMJ\carex-tuckermannii-habit.jpg	2010-08-02 17:11:33	C:\January 2011 GLOSS PIVOT DEPLOY TESTS\JAN 04 2011\REAL A-10\A10_files\images\carex-tuckermannii-habit.xml	Carex tuckermanii			Carex	taxon	Carex tuckermanii	Canada	United States								Connecticut						Illinois	Indiana	Iowa				Maine	Maryland	Massachusetts	Michigan		Mississippi					New Hampshire	New Jersey		New York			Ohio
F:\AUGUST 2010 PIVOT IMAGES\MASTER TMJ\carex-tuckermannii-habitat-3jpg (2).jpg	#705	F:\AUGUST 2010 PIVOT IMAGES\MASTER TMJ\carex-tuckermannii-habitat-3jpg (2).jpg	2010-08-02 17:11:33	C:\January 2011 GLOSS PIVOT DEPLOY TESTS\JAN 04 2011\REAL A-10\A10_files\images\carex-tuckermannii-habitat-3jpg(2).xml	Carex tuckermanii			Carex	taxon	Carex tuckermanii	Canada	United States								Connecticut						Illinois	Indiana	Iowa				Maine	Maryland	Massachusetts	Michigan		Mississippi					New Hampshire	New Jersey		New York			Ohio
F:\AUGUST 2010 PIVOT IMAGES\MASTER TMJ\carex-tuckermannii-habitat-3jpg-(1).jpg	#706	F:\AUGUST 2010 PIVOT IMAGES\MASTER TMJ\carex-tuckermannii-habitat-3jpg-(1).jpg	2010-08-02 17:11:33	C:\January 2011 GLOSS PIVOT DEPLOY TESTS\JAN 04 2011\REAL A-10\A10_files\images\carex-tuckermannii-habitat-3jpg-(1).xml	Carex tuckermanii			Carex	taxon	Carex tuckermanii	Canada	United States								Connecticut						Illinois	Indiana	Iowa				Maine	Maryland	Massachusetts	Michigan		Mississippi					New Hampshire	New Jersey		New York			Ohio
F:\AUGUST 2010 PIVOT IMAGES\MASTER TMJ\carex-tuckermannii-lateral-spikejpg (4).jpg	#707	F:\AUGUST 2010 PIVOT IMAGES\MASTER TMJ\carex-tuckermannii-lateral-spikejpg (4).jpg	2010-08-02 17:11:33	C:\January 2011 GLOSS PIVOT DEPLOY TESTS\JAN 04 2011\REAL A-10\A10_files\images\carex-tuckermannii-lateral-spikejpg(4).xml	Carex tuckermanii			Carex	taxon	Carex tuckermanii	Canada	United States								Connecticut						Illinois	Indiana	Iowa				Maine	Maryland	Massachusetts	Michigan		Mississippi					New Hampshire	New Jersey		New York			Ohio
F:\AUGUST 2010 PIVOT IMAGES\MASTER TMJ\carex-turgescens-habit2.jpg	#708	F:\AUGUST 2010 PIVOT IMAGES\MASTER TMJ\carex-turgescens-habit2.jpg	2010-08-02 17:11:33	C:\January 2011 GLOSS PIVOT DEPLOY TESTS\JAN 04 2011\REAL A-10\A10_files\images\carex-turgescens-habit2.xml	Carex turgescens			Carex	taxon	Carex turgescens		United States		Alabama								Florida	Georgia								Louisiana						Mississippi									North Carolina
F:\AUGUST 2010 PIVOT IMAGES\MASTER TMJ\carex-turgescens-inflorescencejpg.jpg	#709	F:\AUGUST 2010 PIVOT IMAGES\MASTER TMJ\carex-turgescens-inflorescencejpg.jpg	2010-08-02 17:11:33	C:\January 2011 GLOSS PIVOT DEPLOY TESTS\JAN 04 2011\REAL A-10\A10_files\images\carex-turgescens-inflorescencejpg.xml	Carex turgescens			Carex	taxon	Carex turgescens		United States		Alabama								Florida	Georgia								Louisiana						Mississippi									North Carolina
F:\AUGUST 2010 PIVOT IMAGES\MASTER TMJ\carex-turgescens-terminal-spike-staminate.jpg	#710	F:\AUGUST 2010 PIVOT IMAGES\MASTER TMJ\carex-turgescens-terminal-spike-staminate.jpg	2010-08-02 17:11:33	C:\January 2011 GLOSS PIVOT DEPLOY TESTS\JAN 04 2011\REAL A-10\A10_files\images\carex-turgescens-terminal-spike-staminate.xml	Carex turgescens			Carex	taxon	Carex turgescens		United States		Alabama								Florida	Georgia								Louisiana						Mississippi									North Carolina
F:\AUGUST 2010 PIVOT IMAGES\MASTER TMJ\carex-utriculata-20070610_0264.JPG	#711	F:\AUGUST 2010 PIVOT IMAGES\MASTER TMJ\carex-utriculata-20070610_0264.JPG	2010-08-02 17:11:33	C:\January 2011 GLOSS PIVOT DEPLOY TESTS\JAN 04 2011\REAL A-10\A10_files\images\carex-utriculata-20070610_0264.xml	Carex utriculata			Carex	taxon	Carex utriculata	Canada	United States	Mexico		Alaska	Arizona			Colorado	Connecticut					Idaho	Illinois	Indiana					Maine	Maryland	Massachusetts	Michigan	Minnesota			Montana		Nevada	New Hampshire		New Mexico	New York	North Carolina		Ohio
F:\AUGUST 2010 PIVOT IMAGES\MASTER TMJ\carex-utriculata-20070610_0273.JPG	#712	F:\AUGUST 2010 PIVOT IMAGES\MASTER TMJ\carex-utriculata-20070610_0273.JPG	2010-08-02 17:11:33	C:\January 2011 GLOSS PIVOT DEPLOY TESTS\JAN 04 2011\REAL A-10\A10_files\images\carex-utriculata-20070610_0273.xml	Carex utriculata			Carex	taxon	Carex utriculata	Canada	United States	Mexico		Alaska	Arizona			Colorado	Connecticut					Idaho	Illinois	Indiana					Maine	Maryland	Massachusetts	Michigan	Minnesota			Montana		Nevada	New Hampshire		New Mexico	New York	North Carolina		Ohio
F:\AUGUST 2010 PIVOT IMAGES\MASTER TMJ\carex-utriculata-20070719_0270.JPG	#713	F:\AUGUST 2010 PIVOT IMAGES\MASTER TMJ\carex-utriculata-20070719_0270.JPG	2010-08-02 17:11:33	C:\January 2011 GLOSS PIVOT DEPLOY TESTS\JAN 04 2011\REAL A-10\A10_files\images\carex-utriculata-20070719_0270.xml	Carex utriculata			Carex	taxon	Carex utriculata	Canada	United States	Mexico		Alaska	Arizona			Colorado	Connecticut					Idaho	Illinois	Indiana					Maine	Maryland	Massachusetts	Michigan	Minnesota			Montana		Nevada	New Hampshire		New Mexico	New York	North Carolina		Ohio
F:\AUGUST 2010 PIVOT IMAGES\MASTER TMJ\carex-utriculata-20070725_0252.JPG	#714	F:\AUGUST 2010 PIVOT IMAGES\MASTER TMJ\carex-utriculata-20070725_0252.JPG	2010-08-02 17:11:33	C:\January 2011 GLOSS PIVOT DEPLOY TESTS\JAN 04 2011\REAL A-10\A10_files\images\carex-utriculata-20070725_0252.xml	Carex utriculata			Carex	taxon	Carex utriculata	Canada	United States	Mexico		Alaska	Arizona			Colorado	Connecticut					Idaho	Illinois	Indiana					Maine	Maryland	Massachusetts	Michigan	Minnesota			Montana		Nevada	New Hampshire		New Mexico	New York	North Carolina		Ohio
F:\AUGUST 2010 PIVOT IMAGES\MASTER TMJ\carex-venusta-20080429_0274.jpg	#715	F:\AUGUST 2010 PIVOT IMAGES\MASTER TMJ\carex-venusta-20080429_0274.jpg	2010-08-02 17:11:33	C:\January 2011 GLOSS PIVOT DEPLOY TESTS\JAN 04 2011\REAL A-10\A10_files\images\carex-venusta-20080429_0274.xml	Carex venusta			Carex	taxon	Carex venusta		United States		Alabama							Delaware	Florida	Georgia							Kentucky	Louisiana		Maryland				Mississippi						New Jersey		New York	North Carolina
F:\AUGUST 2010 PIVOT IMAGES\MASTER TMJ\carex-venusta-20080429_0279.jpg	#716	F:\AUGUST 2010 PIVOT IMAGES\MASTER TMJ\carex-venusta-20080429_0279.jpg	2010-08-02 17:11:33	C:\January 2011 GLOSS PIVOT DEPLOY TESTS\JAN 04 2011\REAL A-10\A10_files\images\carex-venusta-20080429_0279.xml	Carex venusta			Carex	taxon	Carex venusta		United States		Alabama							Delaware	Florida	Georgia							Kentucky	Louisiana		Maryland				Mississippi						New Jersey		New York	North Carolina
F:\AUGUST 2010 PIVOT IMAGES\MASTER TMJ\carex-venusta-20080429_0288.jpg	#717	F:\AUGUST 2010 PIVOT IMAGES\MASTER TMJ\carex-venusta-20080429_0288.jpg	2010-08-02 17:11:33	C:\January 2011 GLOSS PIVOT DEPLOY TESTS\JAN 04 2011\REAL A-10\A10_files\images\carex-venusta-20080429_0288.xml	Carex venusta			Carex	taxon	Carex venusta		United States		Alabama							Delaware	Florida	Georgia							Kentucky	Louisiana		Maryland				Mississippi						New Jersey		New York	North Carolina
F:\AUGUST 2010 PIVOT IMAGES\MASTER TMJ\carex-venusta-terminal-spike-staminate.jpg	#718	F:\AUGUST 2010 PIVOT IMAGES\MASTER TMJ\carex-venusta-terminal-spike-staminate.jpg	2010-08-02 17:11:33	C:\January 2011 GLOSS PIVOT DEPLOY TESTS\JAN 04 2011\REAL A-10\A10_files\images\carex-venusta-terminal-spike-staminate.xml	Carex venusta			Carex	taxon	Carex venusta		United States		Alabama							Delaware	Florida	Georgia							Kentucky	Louisiana		Maryland				Mississippi						New Jersey		New York	North Carolina
F:\AUGUST 2010 PIVOT IMAGES\MASTER TMJ\carex-virdula-anthesis.jpg	#719	F:\AUGUST 2010 PIVOT IMAGES\MASTER TMJ\carex-virdula-anthesis.jpg	2010-08-02 17:11:33	C:\January 2011 GLOSS PIVOT DEPLOY TESTS\JAN 04 2011\REAL A-10\A10_files\images\carex-virdula-anthesis.xml	Carex viridula			Carex	taxon	Carex viridula	Canada	United States			Alaska			California	Colorado	Connecticut					Idaho	Illinois	Indiana					Maine		Massachusetts	Michigan	Minnesota			Montana		Nevada	New Hampshire	New Jersey	New Mexico	New York		North Dakota	Ohio
F:\AUGUST 2010 PIVOT IMAGES\MASTER TMJ\carex-viridula-anthesis.jpg	#720	F:\AUGUST 2010 PIVOT IMAGES\MASTER TMJ\carex-viridula-anthesis.jpg	2010-08-02 17:11:33	C:\January 2011 GLOSS PIVOT DEPLOY TESTS\JAN 04 2011\REAL A-10\A10_files\images\carex-viridula-anthesis.xml	Carex viridula			Carex	taxon	Carex viridula	Canada	United States			Alaska			California	Colorado	Connecticut					Idaho	Illinois	Indiana					Maine		Massachusetts	Michigan	Minnesota			Montana		Nevada	New Hampshire	New Jersey	New Mexico	New York		North Dakota	Ohio
F:\AUGUST 2010 PIVOT IMAGES\MASTER TMJ\carex-viridula-habitat2.jpg	#721	F:\AUGUST 2010 PIVOT IMAGES\MASTER TMJ\carex-viridula-habitat2.jpg	2010-08-02 17:11:33	C:\January 2011 GLOSS PIVOT DEPLOY TESTS\JAN 04 2011\REAL A-10\A10_files\images\carex-viridula-habitat2.xml	Carex viridula			Carex	taxon	Carex viridula	Canada	United States			Alaska			California	Colorado	Connecticut					Idaho	Illinois	Indiana					Maine		Massachusetts	Michigan	Minnesota			Montana		Nevada	New Hampshire	New Jersey	New Mexico	New York		North Dakota	Ohio
F:\AUGUST 2010 PIVOT IMAGES\MASTER TMJ\carex-viridula-habitat3.jpg	#722	F:\AUGUST 2010 PIVOT IMAGES\MASTER TMJ\carex-viridula-habitat3.jpg	2010-08-02 17:11:33	C:\January 2011 GLOSS PIVOT DEPLOY TESTS\JAN 04 2011\REAL A-10\A10_files\images\carex-viridula-habitat3.xml	Carex viridula			Carex	taxon	Carex viridula	Canada	United States			Alaska			California	Colorado	Connecticut					Idaho	Illinois	Indiana					Maine		Massachusetts	Michigan	Minnesota			Montana		Nevada	New Hampshire	New Jersey	New Mexico	New York		North Dakota	Ohio
F:\AUGUST 2010 PIVOT IMAGES\MASTER TMJ\carex-viridula-habitat6.jpg	#723	F:\AUGUST 2010 PIVOT IMAGES\MASTER TMJ\carex-viridula-habitat6.jpg	2010-08-02 17:11:33	C:\January 2011 GLOSS PIVOT DEPLOY TESTS\JAN 04 2011\REAL A-10\A10_files\images\carex-viridula-habitat6.xml	Carex viridula			Carex	taxon	Carex viridula	Canada	United States			Alaska			California	Colorado	Connecticut					Idaho	Illinois	Indiana					Maine		Massachusetts	Michigan	Minnesota			Montana		Nevada	New Hampshire	New Jersey	New Mexico	New York		North Dakota	Ohio
F:\AUGUST 2010 PIVOT IMAGES\MATSON\A\abrupta\1-94.jpg	#724	F:\AUGUST 2010 PIVOT IMAGES\MATSON\A\abrupta\1-94.jpg	2003-06-22 17:29:50	C:\January 2011 GLOSS PIVOT DEPLOY TESTS\JAN 04 2011\REAL A-10\A10_files\images\1-94.xml	Carex abrupta	http://calphotos.berkeley.edu/cgi/photographer_query?where-name_full=Steve+Matson&one=T		Carex	taxon	Carex abrupta		United States						California							Idaho																Nevada
F:\AUGUST 2010 PIVOT IMAGES\MATSON\A\abrupta\3-06.jpg	#725	F:\AUGUST 2010 PIVOT IMAGES\MATSON\A\abrupta\3-06.jpg	2003-06-23 11:43:20	C:\January 2011 GLOSS PIVOT DEPLOY TESTS\JAN 04 2011\REAL A-10\A10_files\images\3-06.xml	Carex abrupta	http://calphotos.berkeley.edu/cgi/photographer_query?where-name_full=Steve+Matson&one=T		Carex	taxon	Carex abrupta		United States						California							Idaho																Nevada
F:\AUGUST 2010 PIVOT IMAGES\MATSON\A\abrupta\5-02.jpg	#726	F:\AUGUST 2010 PIVOT IMAGES\MATSON\A\abrupta\5-02.jpg	2003-06-23 11:48:50	C:\January 2011 GLOSS PIVOT DEPLOY TESTS\JAN 04 2011\REAL A-10\A10_files\images\5-02.xml	Carex abrupta	http://calphotos.berkeley.edu/cgi/photographer_query?where-name_full=Steve+Matson&one=T		Carex	taxon	Carex abrupta		United States						California							Idaho																Nevada
F:\AUGUST 2010 PIVOT IMAGES\MATSON\A\abrupta\128-2854_IMG.JPG	#727	F:\AUGUST 2010 PIVOT IMAGES\MATSON\A\abrupta\128-2854_IMG.JPG	2002-12-15 19:28:08	C:\January 2011 GLOSS PIVOT DEPLOY TESTS\JAN 04 2011\REAL A-10\A10_files\images\128-2854_IMG.xml	Carex abrupta	http://calphotos.berkeley.edu/cgi/photographer_query?where-name_full=Steve+Matson&one=T		Carex	taxon	Carex abrupta		United States						California							Idaho																Nevada
F:\AUGUST 2010 PIVOT IMAGES\MATSON\A\albida\1-61.jpg	#728	F:\AUGUST 2010 PIVOT IMAGES\MATSON\A\albida\1-61.jpg	2003-06-10 22:13:14	C:\January 2011 GLOSS PIVOT DEPLOY TESTS\JAN 04 2011\REAL A-10\A10_files\images\1-61.xml	Carex albida	http://calphotos.berkeley.edu/cgi/photographer_query?where-name_full=Steve+Matson&one=T		Carex	taxon	Carex albida		United States						California
F:\AUGUST 2010 PIVOT IMAGES\MATSON\A\albida\2-62.jpg	#729	F:\AUGUST 2010 PIVOT IMAGES\MATSON\A\albida\2-62.jpg	2003-06-10 22:16:54	C:\January 2011 GLOSS PIVOT DEPLOY TESTS\JAN 04 2011\REAL A-10\A10_files\images\2-62.xml	Carex albida	http://calphotos.berkeley.edu/cgi/photographer_query?where-name_full=Steve+Matson&one=T		Carex	taxon	Carex albida		United States						California
F:\AUGUST 2010 PIVOT IMAGES\MATSON\A\albida\3-65.jpg	#730	F:\AUGUST 2010 PIVOT IMAGES\MATSON\A\albida\3-65.jpg	2003-06-10 22:18:42	C:\January 2011 GLOSS PIVOT DEPLOY TESTS\JAN 04 2011\REAL A-10\A10_files\images\3-65.xml	Carex albida	http://calphotos.berkeley.edu/cgi/photographer_query?where-name_full=Steve+Matson&one=T		Carex	taxon	Carex albida		United States						California
F:\AUGUST 2010 PIVOT IMAGES\MATSON\A\albida\4-64.jpg	#731	F:\AUGUST 2010 PIVOT IMAGES\MATSON\A\albida\4-64.jpg	2003-06-10 22:20:06	C:\January 2011 GLOSS PIVOT DEPLOY TESTS\JAN 04 2011\REAL A-10\A10_files\images\4-64.xml	Carex albida	http://calphotos.berkeley.edu/cgi/photographer_query?where-name_full=Steve+Matson&one=T		Carex	taxon	Carex albida		United States						California
F:\AUGUST 2010 PIVOT IMAGES\MATSON\A\albonigra\5+2707.jpg	#732	F:\AUGUST 2010 PIVOT IMAGES\MATSON\A\albonigra\5+2707.jpg	2004-11-14 22:18:18	C:\January 2011 GLOSS PIVOT DEPLOY TESTS\JAN 04 2011\REAL A-10\A10_files\images\5+2707.xml	Carex albonigra	http://calphotos.berkeley.edu/cgi/photographer_query?where-name_full=Steve+Matson&one=T		Carex	taxon	Carex albonigra	Canada	United States			Alaska	Arizona		California	Colorado						Idaho														Montana		Nevada
F:\AUGUST 2010 PIVOT IMAGES\MATSON\A\albonigra\7+698.jpg	#733	F:\AUGUST 2010 PIVOT IMAGES\MATSON\A\albonigra\7+698.jpg	2004-11-14 22:21:42	C:\January 2011 GLOSS PIVOT DEPLOY TESTS\JAN 04 2011\REAL A-10\A10_files\images\7+698.xml	Carex albonigra	http://calphotos.berkeley.edu/cgi/photographer_query?where-name_full=Steve+Matson&one=T		Carex	taxon	Carex albonigra	Canada	United States			Alaska	Arizona		California	Colorado						Idaho														Montana		Nevada
F:\AUGUST 2010 PIVOT IMAGES\MATSON\A\albonigra\9+2694.jpg	#734	F:\AUGUST 2010 PIVOT IMAGES\MATSON\A\albonigra\9+2694.jpg	2004-11-14 22:26:12	C:\January 2011 GLOSS PIVOT DEPLOY TESTS\JAN 04 2011\REAL A-10\A10_files\images\9+2694.xml	Carex albonigra	http://calphotos.berkeley.edu/cgi/photographer_query?where-name_full=Steve+Matson&one=T		Carex	taxon	Carex albonigra	Canada	United States			Alaska	Arizona		California	Colorado						Idaho														Montana		Nevada
F:\AUGUST 2010 PIVOT IMAGES\MATSON\A\albonigra\132-3201_IMG.JPG	#735	F:\AUGUST 2010 PIVOT IMAGES\MATSON\A\albonigra\132-3201_IMG.JPG	2003-01-29 15:57:32	C:\January 2011 GLOSS PIVOT DEPLOY TESTS\JAN 04 2011\REAL A-10\A10_files\images\132-3201_IMG.xml	Carex albonigra	http://calphotos.berkeley.edu/cgi/photographer_query?where-name_full=Steve+Matson&one=T		Carex	taxon	Carex albonigra	Canada	United States			Alaska	Arizona		California	Colorado						Idaho														Montana		Nevada
F:\AUGUST 2010 PIVOT IMAGES\MATSON\A\albonigra\IMG_2694.JPG	#736	F:\AUGUST 2010 PIVOT IMAGES\MATSON\A\albonigra\IMG_2694.JPG	2004-10-23 13:30:00	C:\January 2011 GLOSS PIVOT DEPLOY TESTS\JAN 04 2011\REAL A-10\A10_files\images\IMG_2694.xml	Carex albonigra	http://calphotos.berkeley.edu/cgi/photographer_query?where-name_full=Steve+Matson&one=T		Carex	taxon	Carex albonigra	Canada	United States			Alaska	Arizona		California	Colorado						Idaho														Montana		Nevada
F:\AUGUST 2010 PIVOT IMAGES\MATSON\A\alma\132-3207_IMG.JPG	#737	F:\AUGUST 2010 PIVOT IMAGES\MATSON\A\alma\132-3207_IMG.JPG	2003-01-29 21:05:44	C:\January 2011 GLOSS PIVOT DEPLOY TESTS\JAN 04 2011\REAL A-10\A10_files\images\132-3207_IMG.xml	Carex alma	http://calphotos.berkeley.edu/cgi/photographer_query?where-name_full=Steve+Matson&one=T		Carex	taxon	Carex alma		United States	Mexico			Arizona		California																							Nevada			New Mexico
F:\AUGUST 2010 PIVOT IMAGES\MATSON\A\alma\132-3210_IMG.JPG	#738	F:\AUGUST 2010 PIVOT IMAGES\MATSON\A\alma\132-3210_IMG.JPG	2003-01-29 16:49:16	C:\January 2011 GLOSS PIVOT DEPLOY TESTS\JAN 04 2011\REAL A-10\A10_files\images\132-3210_IMG.xml	Carex alma	http://calphotos.berkeley.edu/cgi/photographer_query?where-name_full=Steve+Matson&one=T		Carex	taxon	Carex alma		United States	Mexico			Arizona		California																							Nevada			New Mexico
F:\AUGUST 2010 PIVOT IMAGES\MATSON\A\alma\132-3297_IMG.JPG	#739	F:\AUGUST 2010 PIVOT IMAGES\MATSON\A\alma\132-3297_IMG.JPG	2003-01-31 19:05:56	C:\January 2011 GLOSS PIVOT DEPLOY TESTS\JAN 04 2011\REAL A-10\A10_files\images\132-3297_IMG.xml	Carex alma	http://calphotos.berkeley.edu/cgi/photographer_query?where-name_full=Steve+Matson&one=T		Carex	taxon	Carex alma		United States	Mexico			Arizona		California																							Nevada			New Mexico
F:\AUGUST 2010 PIVOT IMAGES\MATSON\A\alma\132-3299_IMG.JPG	#740	F:\AUGUST 2010 PIVOT IMAGES\MATSON\A\alma\132-3299_IMG.JPG	2003-01-31 19:06:20	C:\January 2011 GLOSS PIVOT DEPLOY TESTS\JAN 04 2011\REAL A-10\A10_files\images\132-3299_IMG.xml	Carex alma	http://calphotos.berkeley.edu/cgi/photographer_query?where-name_full=Steve+Matson&one=T		Carex	taxon	Carex alma		United States	Mexico			Arizona		California																							Nevada			New Mexico
F:\AUGUST 2010 PIVOT IMAGES\MATSON\A\amplectens\128-2831_IMG.JPG	#741	F:\AUGUST 2010 PIVOT IMAGES\MATSON\A\amplectens\128-2831_IMG.JPG	2002-12-14 15:42:50	C:\January 2011 GLOSS PIVOT DEPLOY TESTS\JAN 04 2011\REAL A-10\A10_files\images\128-2831_IMG.xml	Carex amplectens	http://calphotos.berkeley.edu/cgi/photographer_query?where-name_full=Steve+Matson&one=T		Carex	taxon	Carex amplectens		United States						California
F:\AUGUST 2010 PIVOT IMAGES\MATSON\A\amplectens\amplectens 4-46.jpg	#742	F:\AUGUST 2010 PIVOT IMAGES\MATSON\A\amplectens\amplectens 4-46.jpg	2002-12-14 16:05:52	C:\January 2011 GLOSS PIVOT DEPLOY TESTS\JAN 04 2011\REAL A-10\A10_files\images\amplectens4-46.xml	Carex amplectens	http://calphotos.berkeley.edu/cgi/photographer_query?where-name_full=Steve+Matson&one=T		Carex	taxon	Carex amplectens		United States						California
F:\AUGUST 2010 PIVOT IMAGES\MATSON\A\amplifolia\119-1913_IMG.JPG	#743	F:\AUGUST 2010 PIVOT IMAGES\MATSON\A\amplifolia\119-1913_IMG.JPG	2002-07-04 01:08:12	C:\January 2011 GLOSS PIVOT DEPLOY TESTS\JAN 04 2011\REAL A-10\A10_files\images\119-1913_IMG.xml	Carex amplifolia	http://calphotos.berkeley.edu/cgi/photographer_query?where-name_full=Steve+Matson&one=T		Carex	taxon	Carex amplifolia	Canada	United States						California							Idaho														Montana					New Mexico
F:\AUGUST 2010 PIVOT IMAGES\MATSON\A\amplifolia\119-1916_IMG.JPG	#744	F:\AUGUST 2010 PIVOT IMAGES\MATSON\A\amplifolia\119-1916_IMG.JPG	2002-07-04 01:09:00	C:\January 2011 GLOSS PIVOT DEPLOY TESTS\JAN 04 2011\REAL A-10\A10_files\images\119-1916_IMG.xml	Carex amplifolia	http://calphotos.berkeley.edu/cgi/photographer_query?where-name_full=Steve+Matson&one=T		Carex	taxon	Carex amplifolia	Canada	United States						California							Idaho														Montana					New Mexico
F:\AUGUST 2010 PIVOT IMAGES\MATSON\A\amplifolia\126-2672_IMG.JPG	#745	F:\AUGUST 2010 PIVOT IMAGES\MATSON\A\amplifolia\126-2672_IMG.JPG	2002-11-26 22:06:50	C:\January 2011 GLOSS PIVOT DEPLOY TESTS\JAN 04 2011\REAL A-10\A10_files\images\126-2672_IMG.xml	Carex amplifolia	http://calphotos.berkeley.edu/cgi/photographer_query?where-name_full=Steve+Matson&one=T		Carex	taxon	Carex amplifolia	Canada	United States						California							Idaho														Montana					New Mexico
F:\AUGUST 2010 PIVOT IMAGES\MATSON\A\amplifolia\Carex amplifolia 3.jpg	#746	F:\AUGUST 2010 PIVOT IMAGES\MATSON\A\amplifolia\Carex amplifolia 3.jpg	2002-11-26 23:01:58	C:\January 2011 GLOSS PIVOT DEPLOY TESTS\JAN 04 2011\REAL A-10\A10_files\images\Carexamplifolia3.xml	Carex amplifolia	http://calphotos.berkeley.edu/cgi/photographer_query?where-name_full=Steve+Matson&one=T		Carex	taxon	Carex amplifolia	Canada	United States						California							Idaho														Montana					New Mexico
F:\AUGUST 2010 PIVOT IMAGES\MATSON\A\angustata\134-3431_IMG.JPG	#747	F:\AUGUST 2010 PIVOT IMAGES\MATSON\A\angustata\134-3431_IMG.JPG	2003-02-02 23:58:40	C:\January 2011 GLOSS PIVOT DEPLOY TESTS\JAN 04 2011\REAL A-10\A10_files\images\134-3431_IMG.xml	Carex angustata	http://calphotos.berkeley.edu/cgi/photographer_query?where-name_full=Steve+Matson&one=T		Carex	taxon	Carex angustata		United States						California							Idaho
F:\AUGUST 2010 PIVOT IMAGES\MATSON\A\angustata\134-3434_IMG.JPG	#748	F:\AUGUST 2010 PIVOT IMAGES\MATSON\A\angustata\134-3434_IMG.JPG	2003-02-03 00:00:06	C:\January 2011 GLOSS PIVOT DEPLOY TESTS\JAN 04 2011\REAL A-10\A10_files\images\134-3434_IMG.xml	Carex angustata	http://calphotos.berkeley.edu/cgi/photographer_query?where-name_full=Steve+Matson&one=T		Carex	taxon	Carex angustata		United States						California							Idaho
F:\AUGUST 2010 PIVOT IMAGES\MATSON\A\angustata\135-3533_IMG.JPG	#749	F:\AUGUST 2010 PIVOT IMAGES\MATSON\A\angustata\135-3533_IMG.JPG	2003-02-03 23:34:46	C:\January 2011 GLOSS PIVOT DEPLOY TESTS\JAN 04 2011\REAL A-10\A10_files\images\135-3533_IMG.xml	Carex angustata	http://calphotos.berkeley.edu/cgi/photographer_query?where-name_full=Steve+Matson&one=T		Carex	taxon	Carex angustata		United States						California							Idaho
F:\AUGUST 2010 PIVOT IMAGES\MATSON\A\angustata\134-3430_IMG.JPG	#750	F:\AUGUST 2010 PIVOT IMAGES\MATSON\A\angustata\134-3430_IMG.JPG	2003-02-02 23:58:28	C:\January 2011 GLOSS PIVOT DEPLOY TESTS\JAN 04 2011\REAL A-10\A10_files\images\134-3430_IMG.xml	Carex angustata	http://calphotos.berkeley.edu/cgi/photographer_query?where-name_full=Steve+Matson&one=T		Carex	taxon	Carex angustata		United States						California							Idaho
F:\AUGUST 2010 PIVOT IMAGES\MATSON\A\aquatilis\132-3217_IMG.JPG	#751	F:\AUGUST 2010 PIVOT IMAGES\MATSON\A\aquatilis\132-3217_IMG.JPG	2003-01-29 21:11:32	C:\January 2011 GLOSS PIVOT DEPLOY TESTS\JAN 04 2011\REAL A-10\A10_files\images\132-3217_IMG.xml	Carex aquatilis	http://calphotos.berkeley.edu/cgi/photographer_query?where-name_full=Steve+Matson&one=T		Carex	taxon	Carex aquatilis	Canada	United States			Alaska	Arizona		California	Colorado	Connecticut					Idaho	Illinois	Indiana	Iowa	Kansas			Maine	Maryland	Massachusetts	Michigan	Minnesota		Missouri	Montana	Nebraska	Nevada	New Hampshire	New Jersey	New Mexico	New York		North Dakota	Ohio
F:\AUGUST 2010 PIVOT IMAGES\MATSON\A\aquatilis\133-3306_IMG.JPG	#752	F:\AUGUST 2010 PIVOT IMAGES\MATSON\A\aquatilis\133-3306_IMG.JPG	2003-01-31 19:10:06	C:\January 2011 GLOSS PIVOT DEPLOY TESTS\JAN 04 2011\REAL A-10\A10_files\images\133-3306_IMG.xml	Carex aquatilis	http://calphotos.berkeley.edu/cgi/photographer_query?where-name_full=Steve+Matson&one=T		Carex	taxon	Carex aquatilis	Canada	United States			Alaska	Arizona		California	Colorado	Connecticut					Idaho	Illinois	Indiana	Iowa	Kansas			Maine	Maryland	Massachusetts	Michigan	Minnesota		Missouri	Montana	Nebraska	Nevada	New Hampshire	New Jersey	New Mexico	New York		North Dakota	Ohio
F:\AUGUST 2010 PIVOT IMAGES\MATSON\A\aquatilis\aq 2-18.jpg	#753	F:\AUGUST 2010 PIVOT IMAGES\MATSON\A\aquatilis\aq 2-18.jpg	2003-01-29 22:26:58	C:\January 2011 GLOSS PIVOT DEPLOY TESTS\JAN 04 2011\REAL A-10\A10_files\images\aq2-18.xml	Carex aquatilis	http://calphotos.berkeley.edu/cgi/photographer_query?where-name_full=Steve+Matson&one=T		Carex	taxon	Carex aquatilis	Canada	United States			Alaska	Arizona		California	Colorado	Connecticut					Idaho	Illinois	Indiana	Iowa	Kansas			Maine	Maryland	Massachusetts	Michigan	Minnesota		Missouri	Montana	Nebraska	Nevada	New Hampshire	New Jersey	New Mexico	New York		North Dakota	Ohio
F:\AUGUST 2010 PIVOT IMAGES\MATSON\A\aquatilis\aq 5-08.jpg	#754	F:\AUGUST 2010 PIVOT IMAGES\MATSON\A\aquatilis\aq 5-08.jpg	2003-02-04 22:53:50	C:\January 2011 GLOSS PIVOT DEPLOY TESTS\JAN 04 2011\REAL A-10\A10_files\images\aq5-08.xml	Carex aquatilis	http://calphotos.berkeley.edu/cgi/photographer_query?where-name_full=Steve+Matson&one=T		Carex	taxon	Carex aquatilis	Canada	United States			Alaska	Arizona		California	Colorado	Connecticut					Idaho	Illinois	Indiana	Iowa	Kansas			Maine	Maryland	Massachusetts	Michigan	Minnesota		Missouri	Montana	Nebraska	Nevada	New Hampshire	New Jersey	New Mexico	New York		North Dakota	Ohio
F:\AUGUST 2010 PIVOT IMAGES\MATSON\A\arcta\134-3415_IMG.JPG	#755	F:\AUGUST 2010 PIVOT IMAGES\MATSON\A\arcta\134-3415_IMG.JPG	2003-02-02 23:47:20	C:\January 2011 GLOSS PIVOT DEPLOY TESTS\JAN 04 2011\REAL A-10\A10_files\images\134-3415_IMG.xml	Carex arcta	http://calphotos.berkeley.edu/cgi/photographer_query?where-name_full=Steve+Matson&one=T		Carex	taxon	Carex arcta	Canada	United States			Alaska			California							Idaho							Maine		Massachusetts	Michigan	Minnesota			Montana			New Hampshire			New York
F:\AUGUST 2010 PIVOT IMAGES\MATSON\A\arcta\arcta 1-22.jpg	#756	F:\AUGUST 2010 PIVOT IMAGES\MATSON\A\arcta\arcta 1-22.jpg	2003-02-04 23:07:00	C:\January 2011 GLOSS PIVOT DEPLOY TESTS\JAN 04 2011\REAL A-10\A10_files\images\arcta1-22.xml	Carex arcta	http://calphotos.berkeley.edu/cgi/photographer_query?where-name_full=Steve+Matson&one=T		Carex	taxon	Carex arcta	Canada	United States			Alaska			California							Idaho							Maine		Massachusetts	Michigan	Minnesota			Montana			New Hampshire			New York
F:\AUGUST 2010 PIVOT IMAGES\MATSON\A\arcta\arcta 4-21.jpg	#757	F:\AUGUST 2010 PIVOT IMAGES\MATSON\A\arcta\arcta 4-21.jpg	2003-02-04 23:36:00	C:\January 2011 GLOSS PIVOT DEPLOY TESTS\JAN 04 2011\REAL A-10\A10_files\images\arcta4-21.xml	Carex arcta	http://calphotos.berkeley.edu/cgi/photographer_query?where-name_full=Steve+Matson&one=T		Carex	taxon	Carex arcta	Canada	United States			Alaska			California							Idaho							Maine		Massachusetts	Michigan	Minnesota			Montana			New Hampshire			New York
F:\AUGUST 2010 PIVOT IMAGES\MATSON\A\atherodes\1-50.jpg	#758	F:\AUGUST 2010 PIVOT IMAGES\MATSON\A\atherodes\1-50.jpg	2003-05-24 01:22:54	C:\January 2011 GLOSS PIVOT DEPLOY TESTS\JAN 04 2011\REAL A-10\A10_files\images\1-50.xml	Carex atherodes	http://calphotos.berkeley.edu/cgi/photographer_query?where-name_full=Steve+Matson&one=T		Carex	taxon	Carex atherodes	Canada	United States			Alaska	Arizona		California	Colorado						Idaho	Illinois	Indiana	Iowa	Kansas	Kentucky		Maine			Michigan	Minnesota		Missouri	Montana	Nebraska	Nevada			New Mexico	New York		North Dakota	Ohio
F:\AUGUST 2010 PIVOT IMAGES\MATSON\A\atherodes\4-56.jpg	#759	F:\AUGUST 2010 PIVOT IMAGES\MATSON\A\atherodes\4-56.jpg	2003-05-24 10:26:28	C:\January 2011 GLOSS PIVOT DEPLOY TESTS\JAN 04 2011\REAL A-10\A10_files\images\4-56.xml	Carex atherodes	http://calphotos.berkeley.edu/cgi/photographer_query?where-name_full=Steve+Matson&one=T		Carex	taxon	Carex atherodes	Canada	United States			Alaska	Arizona		California	Colorado						Idaho	Illinois	Indiana	Iowa	Kansas	Kentucky		Maine			Michigan	Minnesota		Missouri	Montana	Nebraska	Nevada			New Mexico	New York		North Dakota	Ohio
F:\AUGUST 2010 PIVOT IMAGES\MATSON\A\atherodes\137-3761_IMG.JPG	#760	F:\AUGUST 2010 PIVOT IMAGES\MATSON\A\atherodes\137-3761_IMG.JPG	2003-03-16 22:22:18	C:\January 2011 GLOSS PIVOT DEPLOY TESTS\JAN 04 2011\REAL A-10\A10_files\images\137-3761_IMG.xml	Carex atherodes	http://calphotos.berkeley.edu/cgi/photographer_query?where-name_full=Steve+Matson&one=T		Carex	taxon	Carex atherodes	Canada	United States			Alaska	Arizona		California	Colorado						Idaho	Illinois	Indiana	Iowa	Kansas	Kentucky		Maine			Michigan	Minnesota		Missouri	Montana	Nebraska	Nevada			New Mexico	New York		North Dakota	Ohio
F:\AUGUST 2010 PIVOT IMAGES\MATSON\A\athrostachya\117-1740_IMG.JPG	#761	F:\AUGUST 2010 PIVOT IMAGES\MATSON\A\athrostachya\117-1740_IMG.JPG	2002-06-03 21:12:48	C:\January 2011 GLOSS PIVOT DEPLOY TESTS\JAN 04 2011\REAL A-10\A10_files\images\117-1740_IMG.xml	Carex athrostachya	http://calphotos.berkeley.edu/cgi/photographer_query?where-name_full=Steve+Matson&one=T		Carex	taxon	Carex athrostachya	Canada	United States	Mexico		Alaska	Arizona		California	Colorado						Idaho														Montana		Nevada						North Dakota
F:\AUGUST 2010 PIVOT IMAGES\MATSON\A\athrostachya\131-3159_IMG.JPG	#762	F:\AUGUST 2010 PIVOT IMAGES\MATSON\A\athrostachya\131-3159_IMG.JPG	2003-01-26 23:15:46	C:\January 2011 GLOSS PIVOT DEPLOY TESTS\JAN 04 2011\REAL A-10\A10_files\images\131-3159_IMG.xml	Carex athrostachya	http://calphotos.berkeley.edu/cgi/photographer_query?where-name_full=Steve+Matson&one=T		Carex	taxon	Carex athrostachya	Canada	United States	Mexico		Alaska	Arizona		California	Colorado						Idaho														Montana		Nevada						North Dakota
F:\AUGUST 2010 PIVOT IMAGES\MATSON\A\athrostachya\athrostachya 3-57.jpg	#763	F:\AUGUST 2010 PIVOT IMAGES\MATSON\A\athrostachya\athrostachya 3-57.jpg	2003-01-26 23:34:54	C:\January 2011 GLOSS PIVOT DEPLOY TESTS\JAN 04 2011\REAL A-10\A10_files\images\athrostachya3-57.xml	Carex athrostachya	http://calphotos.berkeley.edu/cgi/photographer_query?where-name_full=Steve+Matson&one=T		Carex	taxon	Carex athrostachya	Canada	United States	Mexico		Alaska	Arizona		California	Colorado						Idaho														Montana		Nevada						North Dakota
F:\AUGUST 2010 PIVOT IMAGES\MATSON\A\athrostachya\tweeked ca ath copy.JPG	#764	F:\AUGUST 2010 PIVOT IMAGES\MATSON\A\athrostachya\tweeked ca ath copy.JPG	2002-08-15 01:15:04	C:\January 2011 GLOSS PIVOT DEPLOY TESTS\JAN 04 2011\REAL A-10\A10_files\images\tweekedcaathcopy.xml	Carex athrostachya	http://calphotos.berkeley.edu/cgi/photographer_query?where-name_full=Steve+Matson&one=T		Carex	taxon	Carex athrostachya	Canada	United States	Mexico		Alaska	Arizona		California	Colorado						Idaho														Montana		Nevada						North Dakota
F:\AUGUST 2010 PIVOT IMAGES\MATSON\B\barbarae\7-19.jpg	#765	F:\AUGUST 2010 PIVOT IMAGES\MATSON\B\barbarae\7-19.jpg	2003-02-06 22:47:44	C:\January 2011 GLOSS PIVOT DEPLOY TESTS\JAN 04 2011\REAL A-10\A10_files\images\7-19.xml	Carex barbarae	http://calphotos.berkeley.edu/cgi/photographer_query?where-name_full=Steve+Matson&one=T		Carex	taxon	Carex barbarae		United States						California
F:\AUGUST 2010 PIVOT IMAGES\MATSON\B\barbarae\barb 4-40.jpg	#766	F:\AUGUST 2010 PIVOT IMAGES\MATSON\B\barbarae\barb 4-40.jpg	2003-01-29 23:07:26	C:\January 2011 GLOSS PIVOT DEPLOY TESTS\JAN 04 2011\REAL A-10\A10_files\images\barb4-40.xml	Carex barbarae	http://calphotos.berkeley.edu/cgi/photographer_query?where-name_full=Steve+Matson&one=T		Carex	taxon	Carex barbarae		United States						California
F:\AUGUST 2010 PIVOT IMAGES\MATSON\B\barbarae\barb 6-17.jpg	#767	F:\AUGUST 2010 PIVOT IMAGES\MATSON\B\barbarae\barb 6-17.jpg	2003-02-05 23:55:30	C:\January 2011 GLOSS PIVOT DEPLOY TESTS\JAN 04 2011\REAL A-10\A10_files\images\barb6-17.xml	Carex barbarae	http://calphotos.berkeley.edu/cgi/photographer_query?where-name_full=Steve+Matson&one=T		Carex	taxon	Carex barbarae		United States						California
F:\AUGUST 2010 PIVOT IMAGES\MATSON\B\bella\132-3248_IMG.JPG	#768	F:\AUGUST 2010 PIVOT IMAGES\MATSON\B\bella\132-3248_IMG.JPG	2003-01-29 21:43:06	C:\January 2011 GLOSS PIVOT DEPLOY TESTS\JAN 04 2011\REAL A-10\A10_files\images\132-3248_IMG.xml	Carex bella	http://calphotos.berkeley.edu/cgi/photographer_query?where-name_full=Steve+Matson&one=T		Carex	taxon	Carex bella		United States	Mexico			Arizona			Colorado																						Nevada			New Mexico
F:\AUGUST 2010 PIVOT IMAGES\MATSON\B\bella\132-3250_IMG.JPG	#769	F:\AUGUST 2010 PIVOT IMAGES\MATSON\B\bella\132-3250_IMG.JPG	2003-01-29 21:45:32	C:\January 2011 GLOSS PIVOT DEPLOY TESTS\JAN 04 2011\REAL A-10\A10_files\images\132-3250_IMG.xml	Carex bella	http://calphotos.berkeley.edu/cgi/photographer_query?where-name_full=Steve+Matson&one=T		Carex	taxon	Carex bella		United States	Mexico			Arizona			Colorado																						Nevada			New Mexico
F:\AUGUST 2010 PIVOT IMAGES\MATSON\B\bella\bella 5-22.jpg	#770	F:\AUGUST 2010 PIVOT IMAGES\MATSON\B\bella\bella 5-22.jpg	2003-02-06 00:00:28	C:\January 2011 GLOSS PIVOT DEPLOY TESTS\JAN 04 2011\REAL A-10\A10_files\images\bella5-22.xml	Carex bella	http://calphotos.berkeley.edu/cgi/photographer_query?where-name_full=Steve+Matson&one=T		Carex	taxon	Carex bella		United States	Mexico			Arizona			Colorado																						Nevada			New Mexico
F:\AUGUST 2010 PIVOT IMAGES\MATSON\B\bella\bella 6-30.jpg	#771	F:\AUGUST 2010 PIVOT IMAGES\MATSON\B\bella\bella 6-30.jpg	2003-02-06 00:02:00	C:\January 2011 GLOSS PIVOT DEPLOY TESTS\JAN 04 2011\REAL A-10\A10_files\images\bella6-30.xml	Carex bella	http://calphotos.berkeley.edu/cgi/photographer_query?where-name_full=Steve+Matson&one=T		Carex	taxon	Carex bella		United States	Mexico			Arizona			Colorado																						Nevada			New Mexico
F:\AUGUST 2010 PIVOT IMAGES\MATSON\B\brainerdii\132-3265_IMG.JPG	#772	F:\AUGUST 2010 PIVOT IMAGES\MATSON\B\brainerdii\132-3265_IMG.JPG	2003-01-29 21:54:04	C:\January 2011 GLOSS PIVOT DEPLOY TESTS\JAN 04 2011\REAL A-10\A10_files\images\132-3265_IMG.xml	Carex brainerdii	http://calphotos.berkeley.edu/cgi/photographer_query?where-name_full=Steve+Matson&one=T		Carex	taxon	Carex brainerdii		United States						California
F:\AUGUST 2010 PIVOT IMAGES\MATSON\B\brainerdii\132-3264_IMG.JPG	#773	F:\AUGUST 2010 PIVOT IMAGES\MATSON\B\brainerdii\132-3264_IMG.JPG	2003-01-29 21:53:50	C:\January 2011 GLOSS PIVOT DEPLOY TESTS\JAN 04 2011\REAL A-10\A10_files\images\132-3264_IMG.xml	Carex brainerdii	http://calphotos.berkeley.edu/cgi/photographer_query?where-name_full=Steve+Matson&one=T		Carex	taxon	Carex brainerdii		United States						California
F:\AUGUST 2010 PIVOT IMAGES\MATSON\B\brainerdii\brainerd 1-36.jpg	#774	F:\AUGUST 2010 PIVOT IMAGES\MATSON\B\brainerdii\brainerd 1-36.jpg	2003-02-06 00:32:16	C:\January 2011 GLOSS PIVOT DEPLOY TESTS\JAN 04 2011\REAL A-10\A10_files\images\brainerd1-36.xml	Carex brainerdii	http://calphotos.berkeley.edu/cgi/photographer_query?where-name_full=Steve+Matson&one=T		Carex	taxon	Carex brainerdii		United States						California
F:\AUGUST 2010 PIVOT IMAGES\MATSON\B\brainerdii\brainerd 4-68.jpg	#775	F:\AUGUST 2010 PIVOT IMAGES\MATSON\B\brainerdii\brainerd 4-68.jpg	2003-02-06 22:57:58	C:\January 2011 GLOSS PIVOT DEPLOY TESTS\JAN 04 2011\REAL A-10\A10_files\images\brainerd4-68.xml	Carex brainerdii	http://calphotos.berkeley.edu/cgi/photographer_query?where-name_full=Steve+Matson&one=T		Carex	taxon	Carex brainerdii		United States						California
F:\AUGUST 2010 PIVOT IMAGES\MATSON\B\brevicaulis\134-3437_IMG.JPG	#776	F:\AUGUST 2010 PIVOT IMAGES\MATSON\B\brevicaulis\134-3437_IMG.JPG	2003-02-03 00:03:10	C:\January 2011 GLOSS PIVOT DEPLOY TESTS\JAN 04 2011\REAL A-10\A10_files\images\134-3437_IMG.xml	Carex brevicaulis	http://calphotos.berkeley.edu/cgi/photographer_query?where-name_full=Steve+Matson&one=T		Carex	taxon	Carex brevicaulis	Canada	United States						California
F:\AUGUST 2010 PIVOT IMAGES\MATSON\B\brevicaulis\134-3441_IMG.JPG	#777	F:\AUGUST 2010 PIVOT IMAGES\MATSON\B\brevicaulis\134-3441_IMG.JPG	2003-02-03 00:04:00	C:\January 2011 GLOSS PIVOT DEPLOY TESTS\JAN 04 2011\REAL A-10\A10_files\images\134-3441_IMG.xml	Carex brevicaulis	http://calphotos.berkeley.edu/cgi/photographer_query?where-name_full=Steve+Matson&one=T		Carex	taxon	Carex brevicaulis	Canada	United States						California
F:\AUGUST 2010 PIVOT IMAGES\MATSON\B\brevicaulis\brevi 5-46.jpg	#778	F:\AUGUST 2010 PIVOT IMAGES\MATSON\B\brevicaulis\brevi 5-46.jpg	2003-02-06 23:16:14	C:\January 2011 GLOSS PIVOT DEPLOY TESTS\JAN 04 2011\REAL A-10\A10_files\images\brevi5-46.xml	Carex brevicaulis	http://calphotos.berkeley.edu/cgi/photographer_query?where-name_full=Steve+Matson&one=T		Carex	taxon	Carex brevicaulis	Canada	United States						California
[truncated: 528 more rows]
[truncated: 141 more columns]

## Sheet: Collection Properties
Collection Title:	Jones T. M., et al. (2010)
Icon:	http://www.herbarium.lsu.edu/keys/favicon.ico
Brand Image:	http://www.herbarium.lsu.edu/keys/LSU-logo-2.png
Additional Search Text:
Copyright:	Jones T. M. (2010)
