# Supplementary material for: A visual identification key utilizing both gestalt and analytic approaches to identification of Carices present in North America (Plantae, Cyperaceae)
Source: Biodivers Data J. 2013 Sep 16;(1):e984. doi: 10.3897/BDJ.1.e984 (PMC3964697; doi:10.3897/BDJ.1.e984)
Supplement: Supplementary file 5 — Authors: Jones, T. M. Data type: XLSX Export from CIIK 2013 in CSV format File: Carex-all-CSV.xlsx [file biodiversity_data_journal-1-e984-s005.xlsx]

## Sheet: Sheet1
	Carex abrupta	Carex abscondita	Carex acidicola	Carex acuta	Carex acrifolia	Carex acutiformis	Carex adrenii	Carex adelostoma	Carex adusta	Carex aestivalis	Carex agglomerata	Carex aggregata	Carex alata	Carex alba	Carex albata	Carex albicans	Carex albida	Carex albolutescens	Carex albonigra	Carex albursina	Carex alliiformis	Carex alma	Carex alligata	Carex alopecoidea	Carex alopecuroides	Carex amgunensis	Carex amphibola	Carex amplectens	Carex amplifolia	Carex angustata	Carex anisostachys	Carex annectens	Carex anthoxanthea	Carex aperta	Carex appalachica	Carex appropinquata	Carex aquatilis	Carex arapahoensis	Carex arctata	Carex arcta	Carex arctiformis	Carex arenaria	Carex arkansana	Carex argyrantha	Carex arnellii	Carex arsenii	Carex assiniboinensis	Carex atherodes	Carex athrostachya
country, state or floristic zone:country:Avoid or use later	1	1	1	1	1	1	1	1	1	1	1	1	1	1	1	1	1	1	1	1	1	1	1	1	1	1	1	1	1	1	1	1	1	1	1	1	1	1	1	1	1	1	1	1	1	1	1	1	1
country, state or floristic zone:country:Afganistan	0	0	0	0	0	1	0	0	0	0	0	0	0	0	0	0	0	0	0	0	0	0	0	0	0	0	0	0	0	0	0	0	0	0	0	0	0	0	0	0	0	0	0	0	0	0	0	0	0
country, state or floristic zone:country:Albania	0	0	0	1	0	1	0	0	0	0	0	0	0	0	0	0	0	0	0	0	0	0	0	0	0	0	0	0	0	0	0	0	0	0	0	0	0	0	0	0	0	0	0	0	0	0	0	0	0
country, state or floristic zone:country:Algeria	0	0	0	0	0	5	0	0	0	0	0	0	0	0	0	0	0	0	0	0	0	0	0	0	0	0	0	0	0	0	0	0	0	0	0	0	0	0	0	0	0	0	0	0	0	0	0	0	0
country, state or floristic zone:country:Argentina	0	0	0	0	0	0	0	0	0	0	0	0	0	0	0	1	0	1	0	0	0	0	0	0	0	0	0	0	0	0	0	0	0	0	0	0	0	0	0	0	0	0	0	0	0	0	0	0	0
country, state or floristic zone:country:Armenia	0	0	0	0	0	0	0	0	0	0	0	0	0	0	0	0	0	0	0	0	0	0	0	0	0	0	0	0	0	0	0	0	0	0	0	0	0	0	0	0	0	0	0	0	0	0	0	0	0
country, state or floristic zone:country:Australia	0	0	0	0	0	0	0	0	0	0	0	0	0	0	0	0	0	0	0	0	0	0	0	0	0	0	0	0	0	0	0	0	0	0	0	0	0	0	0	0	0	1	0	0	0	0	0	0	0
country, state or floristic zone:country:Austria	0	0	0	1	0	1	0	0	0	0	0	0	0	1	0	0	0	0	0	0	0	0	0	0	0	0	0	0	0	0	0	0	0	0	0	1	0	0	0	0	0	1	0	0	0	0	0	0	0
country, state or floristic zone:country:Azerbaijan	0	0	0	0	0	0	0	0	0	0	0	0	0	0	0	0	0	0	0	0	0	0	0	0	0	0	0	0	0	0	0	0	0	0	0	0	0	0	0	0	0	0	0	0	0	0	0	1	0
country, state or floristic zone:country:Belarus	0	0	0	0	0	1	0	0	0	0	0	0	0	1	0	0	0	0	0	0	0	0	0	0	0	1	0	0	0	0	0	0	0	0	0	0	0	0	0	0	0	0	0	0	0	0	0	0	0
country, state or floristic zone:country:Belgium	0	0	0	0	0	1	0	0	0	0	0	0	0	0	0	0	0	0	0	0	0	0	0	0	0	0	0	0	0	0	0	0	0	0	0	1	0	0	0	0	0	1	0	0	0	0	0	0	0
country, state or floristic zone:country:Belize	0	0	0	0	0	0	0	0	0	0	0	0	0	0	0	0	0	0	0	0	0	0	0	0	0	0	0	0	0	0	0	0	0	0	0	0	0	0	0	0	0	0	0	0	0	0	0	0	0
country, state or floristic zone:country:Bermuda	0	0	0	0	0	0	0	0	0	0	0	0	0	0	0	0	0	0	0	0	0	0	0	0	0	0	0	0	0	0	0	0	0	0	0	0	0	0	0	0	0	0	0	0	0	0	0	0	0
country, state or floristic zone:country:Bolivia	0	0	0	0	0	0	0	0	0	0	0	0	0	0	0	0	0	0	0	0	0	0	0	0	0	0	0	0	0	0	0	0	0	0	0	0	0	0	0	0	0	0	0	0	0	0	0	0	0
country, state or floristic zone:country:Bosnia and Herzegovina	0	0	0	1	0	1	0	0	0	0	0	0	0	1	0	0	0	0	0	0	0	0	0	0	0	0	0	0	0	0	0	0	0	0	0	1	0	0	0	0	0	0	0	0	0	0	0	0	0
country, state or floristic zone:country:Brazil	0	0	0	0	0	0	0	0	0	0	0	0	0	0	0	0	0	1	0	0	0	0	0	0	0	0	0	0	0	0	0	0	0	0	0	0	0	0	0	0	0	0	0	0	0	0	0	0	0
country, state or floristic zone:country:Bulgaria	0	0	0	1	0	1	0	0	0	0	0	0	0	0	0	0	0	0	0	0	0	0	0	0	0	0	0	0	0	0	0	0	0	0	0	0	0	0	0	0	0	0	0	0	0	0	0	0	0
country, state or floristic zone:country:Cambodia	0	0	0	0	0	0	0	0	0	0	0	0	0	0	0	0	0	0	0	0	0	0	0	0	0	0	0	0	0	0	0	0	0	0	0	0	0	0	0	0	0	0	0	0	0	0	0	0	0
country, state or floristic zone:country:Canada	0	0	0	0	0	0	0	1	1	0	0	1	1	0	0	1	0	0	1	1	0	0	0	1	0	0	1	0	1	0	0	1	1	1	1	0	1	0	1	1	1	0	0	1	0	0	1	1	1
country, state or floristic zone:country:Chile	0	0	0	0	0	0	0	0	0	0	0	0	0	0	0	1	0	0	0	0	0	0	0	0	0	0	0	0	0	0	0	0	0	0	0	0	1	0	0	0	0	0	0	0	0	0	0	0	0
country, state or floristic zone:country:China	0	0	0	0	0	0	1	0	0	0	1	0	0	1	1	0	0	0	0	0	1	0	0	0	1	1	0	0	0	0	0	0	0	0	0	0	0	0	0	0	0	0	0	0	1	0	0	0	0
country, state or floristic zone:country:Colombia	0	0	0	0	0	0	0	0	0	0	0	0	0	0	0	0	0	0	0	0	0	0	0	0	0	0	0	0	0	0	0	0	0	0	0	0	0	0	0	0	0	0	0	0	0	0	0	0	0
country, state or floristic zone:country:Costa Rica	0	0	0	0	0	0	0	0	0	0	0	0	0	0	0	0	0	0	0	0	0	0	0	0	0	0	0	0	0	0	0	0	0	0	0	0	0	0	0	0	0	0	0	0	0	0	0	0	0
country, state or floristic zone:country:Croatia	0	0	0	0	0	0	0	0	0	0	0	0	0	1	0	0	0	0	0	0	0	0	0	0	0	0	0	0	0	0	0	0	0	0	0	0	0	0	0	0	0	0	0	0	0	0	0	0	0
country, state or floristic zone:country:Cuba	0	0	0	0	0	0	0	0	0	0	0	0	0	0	0	0	0	0	0	0	0	0	0	0	0	0	0	0	0	0	0	0	0	0	0	0	0	0	0	0	0	0	0	0	0	0	0	0	0
country, state or floristic zone:country:Czech Republic	0	0	0	1	0	1	0	0	0	0	0	0	0	1	0	0	0	0	0	0	0	0	0	0	0	0	0	0	0	0	0	0	0	0	0	1	0	0	0	0	0	0	0	0	0	0	0	0	0
country, state or floristic zone:country:Denmark	0	0	0	1	0	1	0	0	0	0	0	0	0	0	0	0	0	0	0	0	0	0	0	0	0	0	0	0	0	0	0	0	0	0	0	1	0	0	0	0	0	1	0	0	0	0	0	0	0
country, state or floristic zone:country:Dominican Republic	0	0	0	0	0	0	0	0	0	0	0	0	0	0	0	0	0	0	0	0	0	0	0	0	0	0	0	0	0	0	0	0	0	0	0	0	0	0	0	0	0	0	0	0	0	0	0	0	0
country, state or floristic zone:country:Ecuador	0	0	0	0	0	0	0	0	0	0	0	0	0	0	0	0	0	0	0	0	0	0	0	0	0	0	0	0	0	0	0	0	0	0	0	0	0	0	0	0	0	0	0	0	0	0	0	0	0
country, state or floristic zone:country:El Salvador	0	0	0	0	0	0	0	0	0	0	0	0	0	0	0	0	0	0	0	0	0	0	0	0	0	0	0	0	0	0	0	0	0	0	0	0	0	0	0	0	0	0	0	0	0	0	0	0	0
country, state or floristic zone:country:Estonia	0	0	0	0	0	1	0	0	0	0	0	0	0	0	0	0	0	0	0	0	0	0	0	0	0	0	0	0	0	0	0	0	0	0	0	0	0	0	0	0	0	0	0	0	0	0	0	0	0
country, state or floristic zone:country:Finland	0	0	0	1	0	1	0	1	0	0	0	0	1	0	0	0	0	0	0	0	0	0	0	0	0	0	0	0	0	0	0	0	0	0	0	1	1	0	0	0	0	1	0	0	0	0	0	1	0
country, state or floristic zone:country:France	0	0	0	1	0	1	0	0	0	0	0	0	0	1	0	0	0	0	0	0	0	0	0	0	0	0	0	0	0	0	0	0	0	0	0	1	0	0	0	0	0	1	0	0	0	0	0	0	0
country, state or floristic zone:country:Georgia	0	0	0	0	0	1	0	0	0	0	0	0	0	0	0	0	0	0	0	0	0	0	0	0	0	0	0	0	0	0	0	0	0	0	0	0	0	0	0	0	0	0	0	0	0	0	0	0	0
country, state or floristic zone:country:Germany	0	0	0	1	0	1	0	0	0	0	0	0	0	1	0	0	0	0	0	0	0	0	0	0	0	0	0	0	0	0	0	0	0	0	0	1	1	0	0	0	0	1	0	0	0	0	0	1	0
country, state or floristic zone:country:Greece	0	0	0	1	0	1	0	0	0	0	0	0	0	0	0	0	0	0	0	0	0	0	0	0	0	0	0	0	0	0	0	0	0	0	0	1	0	0	0	0	0	0	0	0	0	0	0	0	0
country, state or floristic zone:country:Greenland	0	0	0	0	0	0	0	0	0	0	0	0	0	0	0	0	0	0	0	0	0	0	0	0	0	0	0	0	0	0	0	0	0	0	0	0	1	0	0	0	0	0	0	0	0	0	0	0	0
country, state or floristic zone:country:Guatemala	0	0	0	0	0	0	0	0	0	0	0	0	0	0	0	1	0	0	0	0	0	0	0	0	0	0	0	0	0	0	0	0	0	0	0	0	0	0	0	0	0	0	0	0	0	0	0	0	0
country, state or floristic zone:country:Haiti	0	0	0	0	0	0	0	0	0	0	0	0	0	0	0	0	0	0	0	0	0	0	0	0	0	0	0	0	0	0	0	0	0	0	0	0	0	0	0	0	0	0	0	0	0	0	0	0	0
country, state or floristic zone:country:Honduras	0	0	0	0	0	0	0	0	0	0	0	0	0	0	0	0	0	0	0	0	0	0	0	0	0	0	0	0	0	0	0	0	0	0	0	0	0	0	0	0	0	0	0	0	0	0	0	0	0
country, state or floristic zone:country:Hungary	0	0	0	1	0	1	0	0	0	0	0	0	0	1	0	0	0	0	0	0	0	0	0	0	0	0	0	0	0	0	0	0	0	0	0	1	0	0	0	0	0	0	0	0	0	0	0	0	0
country, state or floristic zone:country:Iceland	0	0	0	0	0	0	0	0	0	0	0	0	0	0	0	0	0	0	0	0	0	0	0	0	0	0	0	0	0	0	0	0	0	0	0	0	0	0	0	0	0	0	0	0	0	0	0	0	0
country, state or floristic zone:country:India	0	0	0	0	0	0	0	0	0	0	0	0	0	0	0	0	0	0	0	0	0	0	0	0	1	0	0	0	0	0	0	0	0	0	0	0	0	0	0	0	0	0	0	0	0	0	0	0	0
country, state or floristic zone:country:Indonesia	0	0	0	0	0	0	0	0	0	0	0	0	0	0	0	0	0	0	0	0	0	0	0	0	0	0	0	0	0	0	0	0	0	0	0	0	0	0	0	0	0	0	0	0	0	0	0	0	0
country, state or floristic zone:country:Iran	0	0	0	0	0	1	0	0	0	0	0	0	0	0	0	0	0	0	0	0	0	0	0	0	0	0	0	0	0	0	0	0	0	0	0	0	0	0	0	0	0	0	0	0	0	0	0	0	0
country, state or floristic zone:country:Iraq	0	0	0	0	0	0	0	0	0	0	0	0	0	0	0	0	0	0	0	0	0	0	0	0	0	0	0	0	0	0	0	0	0	0	0	0	0	0	0	0	0	0	0	0	0	0	0	0	0
country, state or floristic zone:country:Israel	0	0	0	0	0	0	0	0	0	0	0	0	0	0	0	0	0	0	0	0	0	0	0	0	0	0	0	0	0	0	0	0	0	0	0	0	0	0	0	0	0	0	0	0	0	0	0	0	0
country, state or floristic zone:country:Italy	0	0	0	1	0	1	0	0	0	0	0	0	0	1	0	0	0	0	0	0	0	0	0	0	0	0	0	0	0	0	0	0	0	0	0	1	0	0	0	0	0	0	0	0	0	0	0	0	0
country, state or floristic zone:country:Japan	0	0	0	0	0	0	0	0	0	0	0	0	0	2	1	0	0	0	0	0	1	0	0	0	1	0	0	0	0	0	0	0	0	0	0	0	0	0	0	0	0	0	0	0	1	0	0	1	0
country, state or floristic zone:country:Jordan	0	0	0	0	0	0	0	0	0	0	0	0	0	0	0	0	0	0	0	0	0	0	0	0	0	0	0	0	0	0	0	0	0	0	0	0	0	0	0	0	0	0	0	0	0	0	0	0	0
country, state or floristic zone:country:Kazakhstan	0	0	0	0	0	0	0	0	0	0	0	0	0	0	0	0	0	0	0	0	0	0	0	0	0	0	0	0	0	0	0	0	0	0	0	0	0	0	0	0	0	0	0	0	0	0	0	0	0
country, state or floristic zone:country:Korea	0	0	0	0	0	0	0	0	0	0	0	0	0	0	0	0	0	0	0	0	0	0	0	0	0	0	0	0	0	0	0	0	0	0	0	0	0	0	0	0	0	0	0	0	1	0	0	0	0
country, state or floristic zone:country:Kyrgyzstan	0	0	0	0	0	0	0	0	0	0	0	0	0	0	0	0	0	0	0	0	0	0	0	0	0	0	0	0	0	0	0	0	0	0	0	0	0	0	0	0	0	0	0	0	0	0	0	0	0
country, state or floristic zone:country:Laos	0	0	0	0	0	0	1	0	0	0	0	0	0	0	0	0	0	0	0	0	0	0	0	0	0	0	0	0	0	0	0	0	0	0	0	0	0	0	0	0	0	0	0	0	0	0	0	0	0
country, state or floristic zone:country:Latvia	0	0	0	1	0	1	0	0	0	0	0	0	0	0	0	0	0	0	0	0	0	0	0	0	0	0	0	0	0	0	0	0	0	0	0	0	1	0	0	0	0	0	0	0	0	0	0	1	0
country, state or floristic zone:country:Lebanon	0	0	0	1	0	0	0	0	0	0	0	0	0	0	0	0	0	0	0	0	0	0	0	0	0	0	0	0	0	0	0	0	0	0	0	0	0	0	0	0	0	0	0	0	0	0	0	0	0
country, state or floristic zone:country:Lesotho	0	0	0	0	0	0	0	0	0	0	0	0	0	0	0	0	0	0	0	0	0	0	0	0	0	0	0	0	0	0	0	0	0	0	0	0	0	0	0	0	0	0	0	0	0	0	0	0	0
country, state or floristic zone:country:Lithuania	0	0	0	1	0	1	0	0	0	0	0	0	0	0	0	0	0	0	0	0	0	0	0	0	0	0	0	0	0	0	0	0	0	0	0	0	0	0	0	0	0	0	0	0	0	0	0	0	0
country, state or floristic zone:country:Luxembourg	0	0	0	1	0	0	0	0	0	0	0	0	0	0	0	0	0	0	0	0	0	0	0	0	0	0	0	0	0	0	0	0	0	0	0	1	0	0	0	0	0	1	0	0	0	0	0	0	0
country, state or floristic zone:country:Macedonia	0	0	0	0	0	0	0	0	0	0	0	0	0	0	0	0	0	0	0	0	0	0	0	0	0	0	0	0	0	0	0	0	0	0	0	0	0	0	0	0	0	0	0	0	0	0	0	0	0
country, state or floristic zone:country:Madagascar	0	0	0	0	0	0	0	0	0	0	0	0	0	0	0	0	0	0	0	0	0	0	0	0	0	0	0	0	0	0	0	0	0	0	0	0	0	0	0	0	0	0	0	0	0	0	0	0	0
country, state or floristic zone:country:Malaysia	0	0	0	0	0	0	0	0	0	0	0	0	0	0	0	0	0	0	0	0	0	0	0	0	0	0	0	0	0	0	0	0	0	0	0	0	0	0	0	0	0	0	0	0	0	0	0	0	0
country, state or floristic zone:country:Mexico	0	0	0	0	0	0	0	0	0	0	0	0	0	0	0	1	0	0	0	0	0	1	0	0	0	0	0	0	0	0	1	0	0	0	0	0	0	0	0	0	0	0	0	0	0	1	0	0	1
country, state or floristic zone:country:Moldova	0	0	0	0	0	0	0	0	0	0	0	0	0	0	0	0	0	0	0	0	0	0	0	0	0	0	0	0	0	0	0	0	0	0	0	0	0	0	0	0	0	0	0	0	0	0	0	0	0
country, state or floristic zone:country:Morocco	0	0	0	1	0	1	0	0	0	0	0	0	0	0	0	0	0	0	0	0	0	0	0	0	0	0	0	0	0	0	0	0	0	0	0	0	0	0	0	0	0	0	0	0	0	0	0	0	0
country, state or floristic zone:country:Myanmar	0	0	0	0	0	0	0	0	0	0	0	0	0	0	0	0	0	0	0	0	0	0	0	0	0	0	0	0	0	0	0	0	0	0	0	0	0	0	0	0	0	0	0	0	0	0	0	0	0
country, state or floristic zone:country:Nepal	0	0	0	0	0	0	0	0	0	0	0	0	0	0	0	0	0	0	0	0	0	0	0	0	1	0	0	0	0	0	0	0	0	0	0	0	0	0	0	0	0	0	0	0	0	0	0	0	0
country, state or floristic zone:country:Netherlands	0	0	0	1	0	1	0	0	0	0	0	0	0	0	0	0	0	0	0	0	0	0	0	0	0	0	0	0	0	0	0	0	0	0	0	1	1	0	0	0	0	1	0	0	0	0	0	0	0
country, state or floristic zone:country:New Zealand	0	0	0	0	0	0	0	0	0	0	0	0	0	0	0	0	0	0	0	0	0	0	0	0	0	0	0	0	0	0	0	0	0	0	0	0	0	0	0	0	0	0	0	0	0	0	0	0	0
country, state or floristic zone:country:Nicaragua	0	0	0	0	0	0	0	0	0	0	0	0	0	0	0	0	0	0	0	0	0	0	0	0	0	0	0	0	0	0	0	0	0	0	0	0	0	0	0	0	0	0	0	0	0	0	0	0	0
country, state or floristic zone:country:Norway	0	0	0	1	0	1	0	1	0	0	0	0	0	0	0	0	0	0	0	0	0	0	0	0	0	0	0	0	0	0	0	0	0	0	0	1	1	0	0	0	0	1	0	0	0	0	0	0	0
country, state or floristic zone:country:Pakistan	0	0	0	0	0	1	0	0	0	0	0	0	0	0	0	0	0	0	0	0	0	0	0	0	0	0	0	0	0	0	0	0	0	0	0	0	0	0	0	0	0	0	0	0	0	0	0	0	0
country, state or floristic zone:country:Panama	0	0	0	0	0	0	0	0	0	0	0	0	0	0	0	0	0	0	0	0	0	0	0	0	0	0	0	0	0	0	0	0	0	0	0	0	0	0	0	0	0	0	0	0	0	0	0	0	0
country, state or floristic zone:country:Papua New Guinea	0	0	0	0	0	0	0	0	0	0	0	0	0	0	0	0	0	0	0	0	0	0	0	0	0	0	0	0	0	0	0	0	0	0	0	0	0	0	0	0	0	0	0	0	0	0	0	0	0
country, state or floristic zone:country:Paraguay	0	0	0	0	0	0	0	0	0	0	0	0	0	0	0	0	0	0	0	0	0	0	0	0	0	0	0	0	0	0	0	0	0	0	0	0	0	0	0	0	0	0	0	0	0	0	0	0	0
country, state or floristic zone:country:Peru	0	0	0	0	0	0	0	0	0	0	0	0	0	0	0	0	0	0	0	0	0	0	0	0	0	0	0	0	0	0	0	0	0	0	0	0	0	0	0	0	0	0	0	0	0	0	0	0	0
country, state or floristic zone:country:Philippines	0	0	0	0	0	0	0	0	0	0	0	0	0	0	0	0	0	0	0	0	0	0	0	0	0	0	0	0	0	0	0	0	0	0	0	0	0	0	0	0	0	0	0	0	0	0	0	0	0
country, state or floristic zone:country:Poland	0	0	0	1	0	1	0	0	0	0	0	0	0	1	0	0	0	0	0	0	0	0	0	0	0	0	0	0	0	0	0	0	0	0	0	1	0	0	0	0	0	1	0	0	0	0	0	1	0
country, state or floristic zone:country:Portugal	0	0	0	1	0	0	0	0	0	0	0	0	0	0	0	0	0	0	0	0	0	0	0	0	0	0	0	0	0	0	0	0	0	0	0	0	0	0	0	0	0	1	0	0	0	0	0	0	0
country, state or floristic zone:country:Romania	0	0	0	1	0	1	0	0	0	0	0	0	0	1	0	0	0	0	0	0	0	0	0	0	0	0	0	0	0	0	0	0	0	0	0	1	0	0	0	0	0	0	0	0	0	0	0	0	0
country, state or floristic zone:country:Russia	0	0	0	1	1	1	0	1	0	0	0	0	0	1	0	0	0	0	0	0	0	0	0	0	0	1	0	0	0	0	0	0	0	0	0	0	1	0	0	0	0	1	0	0	1	0	0	1	0
country, state or floristic zone:country:Serbia	0	0	0	1	0	0	0	0	0	0	0	0	0	1	0	0	0	0	0	0	0	0	0	0	0	0	0	0	0	0	0	0	0	0	0	0	0	0	0	0	0	0	0	0	0	0	0	0	0
country, state or floristic zone:country:Slovakia	0	0	0	1	0	0	0	0	0	0	0	0	0	1	0	0	0	0	0	0	0	0	0	0	0	0	0	0	0	0	0	0	0	0	0	0	0	0	0	0	0	0	0	0	0	0	0	0	0
country, state or floristic zone:country:Slovenia	0	0	0	1	0	0	0	0	0	0	0	0	0	1	0	0	0	0	0	0	0	0	0	0	0	0	0	0	0	0	0	0	0	0	0	0	0	0	0	0	0	0	0	0	0	0	0	0	0
country, state or floristic zone:country:South Africa	0	0	0	0	0	0	0	0	0	0	0	0	0	0	0	0	0	0	0	0	0	0	0	0	0	0	0	0	0	0	0	0	0	0	0	0	0	0	0	0	0	0	0	0	0	0	0	0	0
country, state or floristic zone:country:Spain	0	0	0	1	0	1	0	0	0	0	0	0	0	1	0	0	0	0	0	0	0	0	0	0	0	0	0	0	0	0	0	0	0	0	0	0	0	0	0	0	0	0	0	0	0	0	0	0	0
country, state or floristic zone:country:Sri Lanka	0	0	0	0	0	0	0	0	0	0	0	0	0	0	0	0	0	0	0	0	0	0	0	0	0	0	0	0	0	0	0	0	0	0	0	0	0	0	0	0	0	0	0	0	0	0	0	0	0
country, state or floristic zone:country:Sweden	0	0	0	1	0	1	0	0	0	0	0	0	0	0	0	0	0	0	0	0	0	0	0	0	0	0	0	0	0	0	0	0	0	0	0	1	1	0	0	0	0	1	0	0	0	0	0	1	0
country, state or floristic zone:country:Switzerland	0	0	0	1	0	1	0	0	0	0	0	0	0	1	0	0	0	0	0	0	0	0	0	1	0	0	0	0	0	0	0	0	0	0	0	1	0	0	0	0	0	0	0	0	0	0	0	0	0
country, state or floristic zone:country:Syria	0	0	0	1	0	0	0	0	0	0	0	0	0	0	0	0	0	0	0	0	0	0	0	0	0	0	0	0	0	0	0	0	0	0	0	0	0	0	0	0	0	0	0	0	0	0	0	0	0
country, state or floristic zone:country:Taiwan	0	0	0	0	0	0	0	0	0	0	0	0	0	0	0	0	0	0	0	0	1	0	0	0	0	0	0	0	0	0	0	0	0	0	0	0	0	0	0	0	0	0	0	0	0	0	0	0	0
country, state or floristic zone:country:Tajikistan	0	0	0	0	0	0	0	0	0	0	0	0	0	0	0	0	0	0	0	0	0	0	0	0	0	0	0	0	0	0	0	0	0	0	0	0	0	0	0	0	0	0	0	0	0	0	0	0	0
country, state or floristic zone:country:Tanzania	0	0	0	0	0	0	0	0	0	0	0	0	0	0	0	0	0	0	0	0	0	0	0	0	0	0	0	0	0	0	0	0	0	0	0	0	0	0	0	0	0	0	0	0	0	0	0	0	0
country, state or floristic zone:country:Thailand	0	0	0	0	0	0	0	0	0	0	0	0	0	0	0	0	0	0	0	0	0	0	0	0	0	0	0	0	0	0	0	0	0	0	0	0	0	0	0	0	0	0	0	0	0	0	0	0	0
country, state or floristic zone:country:Tunisia	0	0	0	1	0	0	0	0	0	0	0	0	0	0	0	0	0	0	0	0	0	0	0	0	0	0	0	0	0	0	0	0	0	0	0	0	0	0	0	0	0	0	0	0	0	0	0	0	0
country, state or floristic zone:country:Turkey	0	0	0	0	0	1	0	0	0	0	0	0	0	0	0	0	0	0	0	0	0	0	0	0	0	0	0	0	0	0	0	0	0	0	0	0	0	0	0	0	0	1	0	0	0	0	0	0	0
country, state or floristic zone:country:Turkmenistan	0	0	0	0	0	0	0	0	0	0	0	0	0	0	0	0	0	0	0	0	0	0	0	0	0	0	0	0	0	0	0	0	0	0	0	0	0	0	0	0	0	0	0	0	0	0	0	0	0
country, state or floristic zone:country:Ukraine	0	0	0	1	0	0	0	0	0	0	0	0	0	1	0	0	0	0	0	0	0	0	0	0	0	1	0	0	0	0	0	0	0	0	0	0	0	0	0	0	0	0	0	0	0	0	0	0	0
country, state or floristic zone:country:United Kingdom	0	0	0	1	0	1	0	0	0	0	0	0	0	0	0	0	0	0	0	0	0	0	0	0	0	0	0	0	0	0	0	0	0	0	0	1	1	0	0	0	0	1	0	0	0	0	0	0	0
country, state or floristic zone:country:United States	1	1	1	0	0	0	0	1	1	1	0	1	1	0	0	1	1	1	1	1	0	1	1	1	0	0	1	1	1	1	0	1	1	1	1	0	1	1	1	1	1	1	1	1	0	0	1	1	1
country, state or floristic zone:country:Uruguay	0	0	0	0	0	0	0	0	0	0	0	0	0	0	0	0	0	1	0	0	0	0	0	0	0	0	0	0	0	0	0	0	0	0	0	0	0	0	0	0	0	0	0	0	0	0	0	0	0
country, state or floristic zone:country:Uzbekistan	0	0	0	0	0	0	0	0	0	0	0	0	0	0	0	0	0	0	0	0	0	0	0	0	0	0	0	0	0	0	0	0	0	0	0	0	0	0	0	0	0	0	0	0	0	0	0	0	0
country, state or floristic zone:country:Venezuela	0	0	0	0	0	0	0	0	0	0	0	0	0	0	0	0	0	0	0	0	0	0	0	0	0	0	0	0	0	0	0	0	0	0	0	0	0	0	0	0	0	0	0	0	0	0	0	0	0
country, state or floristic zone:country:Viet Nam	0	0	0	0	0	0	1	0	0	0	0	0	0	0	0	0	0	0	0	0	1	0	0	0	0	0	0	0	0	0	0	0	0	0	0	0	0	0	0	0	0	0	0	0	0	0	0	0	0
country, state or floristic zone:country:Yemen	0	0	0	0	0	0	0	0	0	0	0	0	0	0	0	0	0	0	0	0	0	0	0	0	0	0	0	0	0	0	0	0	0	0	0	0	0	0	0	0	0	0	0	0	0	0	0	0	0
country, state or floristic zone:US State and Commonwealth:Avoid or use later	1	1	1	1	1	1	1	1	1	1	1	1	1	1	1	1	1	1	1	1	1	1	1	1	1	1	1	1	1	1	1	1	1	1	1	1	1	1	1	1	1	1	1	1	1	1	1	1	1
country, state or floristic zone:US State and Commonwealth:Alabama	0	1	1	0	0	0	0	0	0	1	0	1	1	0	0	1	0	1	0	1	0	0	0	0	0	0	1	0	0	0	0	0	0	0	0	0	0	0	0	0	0	0	0	0	0	0	0	0	0
country, state or floristic zone:US State and Commonwealth:Alaska	0	0	0	0	0	0	0	1	0	0	0	0	0	0	0	0	0	0	1	0	0	0	0	0	0	0	0	0	0	0	0	0	1	0	0	0	1	0	0	1	1	0	0	0	0	0	0	1	1
country, state or floristic zone:US State and Commonwealth:Arizona	0	0	0	0	0	0	0	0	0	0	0	0	0	0	0	0	0	0	1	0	0	1	0	0	0	0	0	0	0	0	0	0	0	0	0	0	1	0	0	0	0	0	0	0	0	0	0	1	1
country, state or floristic zone:US State and Commonwealth:Arkansas	0	1	0	0	0	0	0	0	0	0	0	0	1	0	0	1	0	1	0	1	0	0	0	0	0	0	1	0	0	0	0	1	0	0	0	0	0	0	0	0	0	0	1	0	0	0	0	0	0
country, state or floristic zone:US State and Commonwealth:California	1	0	0	0	0	0	0	0	0	0	0	0	0	0	0	0	1	0	1	0	0	1	0	0	0	0	0	1	1	1	0	0	0	0	0	0	1	0	0	1	0	0	0	0	0	0	0	1	1
country, state or floristic zone:US State and Commonwealth:Colorado	0	0	0	0	0	0	0	0	0	0	0	0	0	0	0	0	0	0	1	0	0	0	0	0	0	0	0	0	0	0	0	0	0	0	0	0	1	1	0	0	0	0	0	0	0	0	0	1	1
country, state or floristic zone:US State and Commonwealth:Connecticut	0	1	0	0	0	1	0	0	0	0	0	0	1	0	0	1	0	1	0	1	0	0	0	1	0	0	1	0	0	0	0	1	0	0	1	0	1	0	1	0	0	0	0	1	0	0	0	0	0
country, state or floristic zone:US State and Commonwealth:Delaware	0	1	0	0	0	0	0	0	0	0	0	1	1	0	0	1	0	1	0	0	0	0	0	1	0	0	1	0	0	0	0	1	0	0	1	0	0	0	0	0	0	1	0	1	0	0	0	0	0
country, state or floristic zone:US State and Commonwealth:Florida	0	1	0	0	0	0	0	0	0	0	0	0	1	0	0	0	0	1	0	0	0	0	0	0	0	0	1	0	0	0	0	0	0	0	0	0	0	0	0	0	0	0	0	0	0	0	0	0	0
country, state or floristic zone:US State and Commonwealth:Georgia	0	1	1	0	0	0	0	0	0	1	0	0	1	0	0	1	0	1	0	1	0	0	0	0	0	0	1	0	0	0	0	0	0	0	1	0	0	0	0	0	0	0	0	0	0	0	0	0	0
country, state or floristic zone:US State and Commonwealth:Hawaii	0	0	0	0	0	0	0	0	0	0	0	0	0	0	0	0	0	0	0	0	0	0	1	0	0	0	0	0	0	0	0	0	0	0	0	0	0	0	0	0	0	0	0	0	0	0	0	0	0
country, state or floristic zone:US State and Commonwealth:Idaho	1	0	0	0	0	0	0	0	1	0	0	0	0	0	0	0	0	0	1	0	0	0	0	0	0	0	0	0	1	1	0	0	0	1	0	0	1	0	0	1	0	0	0	0	0	0	0	1	1
country, state or floristic zone:US State and Commonwealth:Illinois	0	0	0	0	0	0	0	0	0	0	0	1	1	0	0	1	0	1	0	1	0	0	0	1	0	0	1	0	0	0	0	1	0	0	0	0	1	0	0	0	0	0	1	0	0	0	0	1	0
country, state or floristic zone:US State and Commonwealth:Indiana	0	0	0	0	0	1	0	0	0	0	0	1	1	0	0	1	0	1	0	1	0	0	0	1	0	0	1	0	0	0	0	1	0	0	0	0	1	0	1	0	0	0	0	0	0	0	0	1	0
country, state or floristic zone:US State and Commonwealth:Iowa	0	0	0	0	0	0	0	0	0	0	0	1	0	0	0	1	0	0	0	1	0	0	0	1	0	0	1	0	0	0	0	1	0	0	0	0	1	0	0	0	0	0	0	0	0	0	1	1	0
country, state or floristic zone:US State and Commonwealth:Kansas	0	0	0	0	0	0	0	0	0	0	0	0	0	0	0	1	0	0	0	0	0	0	0	0	0	0	1	0	0	0	0	1	0	0	0	0	1	0	0	0	0	0	1	0	0	0	0	1	0
country, state or floristic zone:US State and Commonwealth:Kentucky	0	1	0	0	0	0	0	0	0	1	0	1	1	0	0	1	0	1	0	1	0	0	0	1	0	0	1	0	0	0	0	1	0	0	0	0	0	0	0	0	0	0	0	0	0	0	0	1	0
country, state or floristic zone:US State and Commonwealth:Louisiana	0	1	0	0	0	0	0	0	0	0	0	0	1	0	0	1	0	1	0	0	0	0	0	0	0	0	1	0	0	0	0	1	0	0	0	0	0	0	0	0	0	0	1	0	0	0	0	0	0
country, state or floristic zone:US State and Commonwealth:Maine	0	0	0	0	0	0	0	0	1	0	0	0	0	0	0	1	0	0	0	0	0	0	0	1	0	0	1	0	0	0	0	1	0	0	1	0	1	0	1	1	0	0	0	1	0	0	0	1	0
country, state or floristic zone:US State and Commonwealth:Maryland	0	1	0	0	0	1	0	0	0	1	0	1	1	0	0	1	0	1	0	1	0	0	0	1	0	0	1	0	0	0	0	1	0	0	1	0	1	0	0	0	0	1	0	1	0	0	0	0	0
country, state or floristic zone:US State and Commonwealth:Massachusetts	0	1	0	0	0	1	0	0	0	0	0	0	1	0	0	1	0	1	0	1	0	0	0	1	0	0	1	0	0	0	0	1	0	0	1	0	1	0	1	1	0	0	0	1	0	0	0	0	0
country, state or floristic zone:US State and Commonwealth:Michigan	0	0	0	0	0	1	0	0	1	0	0	0	1	0	0	1	0	1	0	1	0	0	0	1	0	0	1	0	0	0	0	1	0	0	0	0	1	0	1	1	0	0	0	1	0	0	1	1	0
country, state or floristic zone:US State and Commonwealth:Minnesota	0	0	0	0	0	0	0	0	1	0	0	1	0	0	0	0	0	0	0	1	0	0	0	1	0	0	1	0	0	0	0	1	0	0	0	0	1	0	1	1	0	0	0	0	0	0	1	1	0
country, state or floristic zone:US State and Commonwealth:Mississippi	0	1	0	0	0	0	0	0	0	0	0	0	0	0	0	1	0	1	0	0	0	0	0	0	0	0	1	0	0	0	0	1	0	0	0	0	0	0	0	0	0	0	0	0	0	0	1	0	0
country, state or floristic zone:US State and Commonwealth:Missouri	0	1	0	0	0	0	0	0	0	0	0	1	1	0	0	1	0	1	0	1	0	0	0	1	0	0	1	0	0	0	0	1	0	0	0	0	1	0	0	0	0	0	1	0	0	0	0	1	0
country, state or floristic zone:US State and Commonwealth:Montana	0	0	0	0	0	0	0	0	0	0	0	0	0	0	0	0	0	0	1	0	0	0	0	0	0	0	0	0	1	0	0	0	0	1	0	0	1	0	0	1	0	0	0	0	0	0	0	1	1
country, state or floristic zone:US State and Commonwealth:Nebraska	0	0	0	0	0	0	0	0	0	0	0	0	0	0	0	1	0	0	0	0	0	0	0	0	0	0	1	0	0	0	0	1	0	0	0	0	1	0	0	0	0	0	0	0	0	0	0	1	0
country, state or floristic zone:US State and Commonwealth:Nevada	1	0	0	0	0	0	0	0	0	0	0	0	0	0	0	0	0	0	1	0	0	1	0	0	0	0	0	0	0	0	0	0	0	0	0	0	1	0	0	0	0	0	0	0	0	0	0	1	1
country, state or floristic zone:US State and Commonwealth:New Hampshire	0	0	0	0	0	0	0	0	1	0	0	0	1	0	0	1	0	0	0	1	0	0	0	1	0	0	1	0	0	0	0	1	0	0	1	0	1	0	1	1	0	0	0	1	0	0	0	0	0
country, state or floristic zone:US State and Commonwealth:New Jersey	0	1	0	0	0	0	0	0	1	0	0	1	1	0	0	1	0	1	0	1	0	0	0	1	0	0	1	0	0	0	0	1	0	0	1	0	1	0	0	0	0	0	0	1	0	0	0	0	0
country, state or floristic zone:US State and Commonwealth:New Mexico	0	0	0	0	0	0	0	0	0	0	0	0	0	0	0	0	0	0	0	0	0	1	0	0	0	0	0	0	1	0	0	0	0	0	0	0	1	0	0	0	0	0	0	0	0	0	0	1	0
country, state or floristic zone:US State and Commonwealth:New York	0	1	0	0	0	1	0	0	1	1	0	1	1	0	0	1	0	1	0	1	0	0	0	1	0	0	1	0	0	0	0	1	0	0	1	0	1	0	1	1	0	0	0	1	0	0	0	1	0
country, state or floristic zone:US State and Commonwealth:North Carolina	0	1	0	0	0	0	0	0	0	1	0	1	1	0	0	1	0	1	0	1	0	0	0	0	0	0	1	0	0	0	0	1	0	0	1	0	0	0	0	0	0	0	0	1	0	0	0	0	0
country, state or floristic zone:US State and Commonwealth:North Dakota	0	0	0	0	0	0	0	0	0	0	0	0	0	0	0	0	0	0	0	0	0	0	0	1	0	0	0	0	0	0	0	0	0	0	0	0	1	0	0	0	0	0	0	0	0	0	1	1	1
country, state or floristic zone:US State and Commonwealth:Ohio	0	1	0	0	0	0	0	0	0	0	0	1	1	0	0	1	0	1	0	1	0	0	0	1	0	0	1	0	0	0	0	1	0	0	1	0	1	0	1	0	0	0	0	1	0	0	0	1	0
country, state or floristic zone:US State and Commonwealth:Oklahoma	0	1	0	0	0	0	0	0	0	0	0	1	1	0	0	1	0	1	0	1	0	0	0	0	0	0	1	0	0	0	0	1	0	0	0	0	0	0	0	0	0	0	1	0	0	0	0	0	0
country, state or floristic zone:US State and Commonwealth:Oregon	1	0	0	0	0	0	0	0	0	0	0	0	0	0	0	0	0	0	1	0	0	0	0	0	0	0	0	0	1	1	0	0	0	1	0	0	1	0	0	1	0	1	0	0	0	0	0	1	1
country, state or floristic zone:US State and Commonwealth:Pennsylvania	0	1	0	0	0	0	0	0	1	1	0	1	1	0	0	1	0	1	0	1	0	0	0	1	0	0	1	0	0	0	0	1	0	0	1	0	1	0	1	0	0	0	0	1	0	0	0	1	0
country, state or floristic zone:US State and Commonwealth:Puerto Rico	0	0	0	0	0	0	0	0	0	0	0	0	0	0	0	0	0	0	0	0	0	0	0	0	0	0	0	0	0	0	0	0	0	0	0	0	0	0	0	0	0	0	0	0	0	0	0	0	0
country, state or floristic zone:US State and Commonwealth:Rhode Island	0	1	0	0	0	0	0	0	0	0	0	0	1	0	0	1	0	1	0	0	0	0	0	1	0	0	1	0	0	0	0	1	0	0	1	0	0	0	1	0	0	0	0	1	0	0	0	0	0
country, state or floristic zone:US State and Commonwealth:South Carolina	0	1	0	0	0	0	0	0	0	1	0	0	1	0	0	1	0	1	0	1	0	0	0	0	0	0	1	0	0	0	0	1	0	0	1	0	0	0	0	0	0	0	0	0	0	0	0	0	0
country, state or floristic zone:US State and Commonwealth:South Dakota	0	0	0	0	0	0	0	0	0	0	0	0	0	0	0	0	0	0	0	0	0	0	0	1	0	0	1	0	0	0	0	0	0	0	0	0	1	0	0	0	0	0	0	0	0	0	1	1	1
country, state or floristic zone:US State and Commonwealth:Tennessee	0	1	0	0	0	0	0	0	0	1	0	0	1	0	0	1	0	1	0	1	0	0	0	1	0	0	1	0	0	0	0	1	0	0	0	0	0	0	0	0	0	0	0	1	0	0	0	0	0
country, state or floristic zone:US State and Commonwealth:Texas	0	1	0	0	0	0	0	0	0	0	0	0	1	0	0	1	0	1	0	0	0	1	0	0	0	0	1	0	0	0	0	0	0	0	0	0	0	0	0	0	0	0	1	0	0	0	0	0	1
country, state or floristic zone:US State and Commonwealth:Utah	0	0	0	0	0	0	0	0	0	0	0	0	0	0	0	0	0	0	1	0	0	0	0	0	0	0	0	0	0	0	0	0	0	0	0	0	1	1	0	0	0	0	0	0	0	0	0	1	1
country, state or floristic zone:US State and Commonwealth:Vermont	0	0	0	0	0	0	0	0	0	1	0	0	0	0	0	1	0	0	0	1	0	0	0	1	0	0	1	0	0	0	0	1	0	0	1	0	1	0	1	1	0	0	0	1	0	0	0	0	0
country, state or floristic zone:US State and Commonwealth:Virginia	0	1	0	0	0	0	0	0	0	1	0	1	1	0	0	1	0	1	0	1	0	0	0	0	0	0	1	0	0	0	0	1	0	0	1	0	1	0	0	0	0	1	0	1	0	0	0	1	0
country, state or floristic zone:US State and Commonwealth:Washington	0	0	0	0	0	0	0	0	0	0	0	0	0	0	0	0	0	0	1	0	0	0	0	0	0	0	0	0	1	1	0	0	0	1	0	0	1	0	0	1	0	0	0	0	0	0	0	1	1
country, state or floristic zone:US State and Commonwealth:West Virginia	0	0	0	0	0	0	0	0	0	1	0	1	0	0	0	1	0	1	0	1	0	0	0	0	0	0	1	0	0	0	0	1	0	0	1	0	0	0	0	0	0	0	0	1	0	0	0	1	0
country, state or floristic zone:US State and Commonwealth:Wisconsin	0	0	0	0	0	0	0	0	1	0	0	1	0	0	0	0	0	0	0	1	0	0	0	1	0	0	1	0	0	0	0	1	0	0	0	0	1	0	1	1	0	0	0	0	0	0	1	1	0
country, state or floristic zone:US State and Commonwealth:Wyoming	0	0	0	0	0	0	0	0	0	0	0	0	0	0	0	0	0	0	1	0	0	0	0	1	0	0	0	0	0	0	0	0	0	0	0	0	1	1	0	0	0	0	0	0	0	0	0	1	1
country, state or floristic zone:Canadian Province and Territory:Avoid or use later	1	1	1	1	1	1	1	1	1	1	1	1	1	1	1	1	1	1	1	1	1	1	1	1	1	1	1	1	1	1	1	1	1	1	1	1	1	1	1	1	1	1	1	1	1	1	1	1	1
country, state or floristic zone:Canadian Province and Territory:Alberta	0	0	0	0	0	0	0	0	1	0	0	0	0	0	0	0	0	0	1	0	0	0	0	0	0	0	0	0	0	0	0	0	0	1	0	0	1	0	0	1	0	0	0	0	0	0	0	1	1
country, state or floristic zone:Canadian Province and Territory:British Columbia	0	0	0	0	0	0	0	0	1	0	0	0	0	0	0	0	0	0	1	0	0	0	0	0	0	0	0	0	1	0	0	0	1	1	0	0	1	0	0	1	1	0	0	0	0	0	0	1	1
country, state or floristic zone:Canadian Province and Territory:Manitoba	0	0	0	0	0	0	0	0	1	0	0	0	0	0	0	0	0	0	0	0	0	0	0	1	0	0	0	0	0	0	0	0	0	0	0	0	1	0	1	1	0	0	0	1	0	0	1	1	1
country, state or floristic zone:Canadian Province and Territory:New Brunswick	0	0	0	0	0	0	0	0	0	0	0	0	0	0	0	0	0	0	0	0	0	0	0	0	0	0	0	0	0	0	0	0	0	0	0	0	1	0	0	1	0	0	0	0	0	0	0	0	0
country, state or floristic zone:Canadian Province and Territory:Newfoundland and Labrador	0	0	0	0	0	0	0	1	0	0	0	0	0	0	0	0	0	0	0	0	0	0	0	0	0	0	0	0	0	0	0	0	0	0	0	0	1	0	1	1	0	0	0	0	0	0	0	0	0
country, state or floristic zone:Canadian Province and Territory:Northwest Territories	0	0	0	0	0	0	0	1	1	0	0	0	0	0	0	0	0	0	1	0	0	0	0	0	0	0	0	0	0	0	0	0	1	0	0	0	1	0	0	1	0	0	0	0	0	0	0	1	0
country, state or floristic zone:Canadian Province and Territory:Nova Scotia	0	0	0	0	0	0	0	0	0	0	0	0	0	0	0	0	0	0	0	0	0	0	0	0	0	0	0	0	0	0	0	0	0	0	0	0	1	0	1	0	0	0	0	1	0	0	0	0	0
country, state or floristic zone:Canadian Province and Territory:Nunavat	0	0	0	0	0	0	0	1	0	0	0	0	0	0	0	0	0	0	0	0	0	0	0	0	0	0	0	0	0	0	0	0	0	0	0	0	1	0	0	0	0	0	0	0	0	0	0	0	0
country, state or floristic zone:Canadian Province and Territory:Ontario	0	0	0	0	0	1	0	0	1	0	0	1	1	0	0	1	0	0	0	1	0	0	0	1	0	0	1	0	0	0	0	1	0	0	1	0	1	0	1	1	0	0	0	1	0	0	1	1	0
country, state or floristic zone:Canadian Province and Territory:Quebec	0	0	0	0	0	0	0	1	1	0	0	0	0	0	0	1	0	0	0	1	0	0	0	1	0	0	0	0	0	0	0	1	0	0	1	0	1	0	1	1	0	0	0	1	0	0	1	1	0
country, state or floristic zone:Canadian Province and Territory:Saskatchewan	0	0	0	0	0	0	0	0	1	0	0	0	0	0	0	0	0	0	0	0	0	0	0	1	0	0	0	0	0	0	0	0	0	0	0	0	1	0	0	1	0	0	0	0	0	0	1	1	1
country, state or floristic zone:Canadian Province and Territory:Yukon	0	0	0	0	0	0	0	0	0	0	0	0	0	0	0	0	0	0	1	0	0	0	0	0	0	0	0	0	0	0	0	0	1	0	0	0	1	0	0	1	0	0	0	0	0	0	0	1	1
country, state or floristic zone:Takhtajan Floristic Region:Avoid or use later	1	1	1	1	1	1	1	1	1	1	1	1	1	1	1	1	1	1	1	1	1	1	1	1	1	1	1	1	1	1	1	1	1	1	1	1	1	1	1	1	1	1	1	1	1	1	1	1	1
country, state or floristic zone:Takhtajan Floristic Region:1. Circumboreal Region	0	0	0	1	0	1	0	1	1	0	0	1	1	1	0	1	0	0	0	1	0	0	0	1	0	1	1	0	0	0	0	1	1	1	1	1	1	0	1	1	1	1	0	1	1	0	1	1	1
country, state or floristic zone:Takhtajan Floristic Region:2. Eastern Asiatic	0	0	0	0	0	1	1	0	0	0	0	0	0	1	1	0	0	0	0	0	1	0	0	0	1	2	0	0	0	0	0	0	0	0	0	0	0	0	0	0	0	0	0	0	1	0	0	0	0
country, state or floristic zone:Takhtajan Floristic Region:3. North American Atlantic Region	0	1	1	0	0	1	0	0	1	1	0	1	1	0	0	1	0	1	1	1	0	0	0	1	0	0	1	0	1	1	0	1	0	1	1	0	1	1	1	1	0	1	1	1	0	0	1	1	0
country, state or floristic zone:Takhtajan Floristic Region:4. Rocky Mountain Region	1	0	0	0	0	0	0	1	1	0	0	1	0	0	0	0	0	0	1	0	0	1	0	1	0	0	0	1	1	1	0	0	1	1	0	0	1	1	0	1	1	1	0	1	0	0	0	1	1
country, state or floristic zone:Takhtajan Floristic Region:5. Macronesian Region	0	0	0	0	0	0	0	0	0	0	0	0	0	0	0	0	0	0	0	0	0	0	0	0	0	0	0	0	0	0	0	0	0	0	0	0	0	0	0	0	0	0	0	0	0	0	0	0	0
country, state or floristic zone:Takhtajan Floristic Region:6. Mediterranean Region	0	0	0	1	0	1	0	0	0	0	0	0	0	1	0	0	0	0	0	0	0	0	0	0	0	0	0	0	0	0	0	0	0	0	0	1	0	0	0	0	0	0	0	0	0	0	0	0	0
country, state or floristic zone:Takhtajan Floristic Region:7. Saharo-Arabian Region	0	0	0	0	0	1	0	0	0	0	0	0	0	0	0	0	0	0	0	0	0	0	0	0	0	0	0	0	0	0	0	0	0	0	0	0	0	0	0	0	0	0	0	0	0	0	0	0	0
country, state or floristic zone:Takhtajan Floristic Region:8. Irano-Turanian Region	0	0	0	1	1	1	0	0	0	0	1	0	0	1	1	0	0	0	0	0	0	0	0	0	0	1	0	0	0	0	0	0	0	0	0	1	0	0	0	0	0	2	0	0	1	0	0	0	0
country, state or floristic zone:Takhtajan Floristic Region:9. Madrean Region	1	0	0	0	0	0	0	0	0	0	0	0	1	0	0	1	1	1	1	1	0	1	0	0	0	0	1	1	1	1	1	1	0	0	0	0	1	1	0	1	0	1	1	0	0	1	0	1	1
country, state or floristic zone:Takhtajan Floristic Region:10. Guineo-Congolian Region	0	0	0	0	0	0	0	0	0	0	0	0	0	0	0	0	0	0	0	0	0	0	0	0	0	0	0	0	0	0	0	0	0	0	0	0	0	0	0	0	0	0	0	0	0	0	0	0	0
country, state or floristic zone:Takhtajan Floristic Region:11. Uzambara-Zululand Region	0	0	0	0	0	1	0	0	0	0	0	0	0	0	0	0	0	0	0	0	0	0	0	0	0	0	0	0	0	0	0	0	0	0	0	0	0	0	0	0	0	0	0	0	0	0	0	0	0
country, state or floristic zone:Takhtajan Floristic Region:12. Sudano-Zambesian Region	0	0	0	0	1	1	0	0	0	0	0	0	0	0	0	0	0	0	0	0	0	0	0	0	0	0	0	0	0	0	0	0	0	0	0	0	0	0	0	0	0	0	0	0	0	0	0	0	0
country, state or floristic zone:Takhtajan Floristic Region:13. Karoo-Namib Region	0	0	0	0	0	1	0	0	0	0	0	0	0	0	0	0	0	0	0	0	0	0	0	0	0	0	0	0	0	0	0	0	0	0	0	0	0	0	0	0	0	0	0	0	0	0	0	0	0
country, state or floristic zone:Takhtajan Floristic Region:14. St. Helena and Ascension Region	0	0	0	0	0	0	0	0	0	0	0	0	0	0	0	0	0	0	0	0	0	0	0	0	0	0	0	0	0	0	0	0	0	0	0	0	0	0	0	0	0	0	0	0	0	0	0	0	0
country, state or floristic zone:Takhtajan Floristic Region:15. Madagascan Region	0	0	0	0	0	0	0	0	0	0	0	0	0	0	0	0	0	0	0	0	0	0	0	0	0	0	0	0	0	0	0	0	0	0	0	0	0	0	0	0	0	0	0	0	0	0	0	0	0
country, state or floristic zone:Takhtajan Floristic Region:16. Indian Region	0	0	0	0	0	0	0	0	0	0	0	0	0	0	0	0	0	0	0	0	0	0	0	0	1	0	0	0	0	0	0	0	0	0	0	0	0	0	0	0	0	0	0	0	0	0	0	0	0
country, state or floristic zone:Takhtajan Floristic Region:17. Indochinese Region	0	0	0	0	0	0	1	0	0	0	0	0	0	0	0	0	0	0	0	0	1	0	0	0	0	0	0	0	0	0	0	0	0	0	0	0	0	0	0	0	0	0	0	0	0	0	0	0	0
country, state or floristic zone:Takhtajan Floristic Region:18. Malesian Region	0	0	0	0	0	0	0	0	0	0	0	0	0	0	0	0	0	0	0	0	0	0	0	0	0	0	0	0	0	0	0	0	0	0	0	0	0	0	0	0	0	0	0	0	0	0	0	0	0
country, state or floristic zone:Takhtajan Floristic Region:19. Fijian Region	0	0	0	0	0	0	0	0	0	0	0	0	0	0	0	0	0	0	0	0	0	0	0	0	0	0	0	0	0	0	0	0	0	0	0	0	0	0	0	0	0	0	0	0	0	0	0	0	0
country, state or floristic zone:Takhtajan Floristic Region:20. Polynesian Region	0	0	0	0	0	0	0	0	0	0	0	0	0	0	0	0	0	0	0	0	0	0	0	0	0	0	0	0	0	0	0	0	0	0	0	0	0	0	0	0	0	0	0	0	0	0	0	0	0
country, state or floristic zone:Takhtajan Floristic Region:21. Hawaiian Region	0	0	0	0	0	0	0	0	0	0	0	0	0	0	0	0	0	0	0	0	0	0	1	0	0	0	0	0	0	0	0	0	0	0	0	0	0	0	0	0	0	0	0	0	0	0	0	0	0
country, state or floristic zone:Takhtajan Floristic Region:22. Neocaledonian Region	0	0	0	0	0	0	0	0	0	0	0	0	0	0	0	0	0	0	0	0	0	0	0	0	0	0	0	0	0	0	0	0	0	0	0	0	0	0	0	0	0	0	0	0	0	0	0	0	0
country, state or floristic zone:Takhtajan Floristic Region:23. Carribean Region	0	1	0	0	0	0	0	0	0	0	0	0	1	0	0	1	0	1	1	0	0	0	0	0	0	0	1	0	0	0	1	0	0	0	0	0	0	0	0	0	0	0	0	0	0	0	0	0	0
country, state or floristic zone:Takhtajan Floristic Region:24. Guyana Highlands Region	0	0	0	0	0	0	0	0	0	0	0	0	0	0	0	0	0	0	0	0	0	0	0	0	0	0	0	0	0	0	0	0	0	0	0	0	0	0	0	0	0	0	0	0	0	0	0	0	0
country, state or floristic zone:Takhtajan Floristic Region:25. Amazonian Region	0	0	0	0	0	0	0	0	0	0	0	0	0	0	0	0	0	0	0	0	0	0	0	0	0	0	0	0	0	0	0	0	0	0	0	0	0	0	0	0	0	0	0	0	0	0	0	0	0
country, state or floristic zone:Takhtajan Floristic Region:26. Brazilian Region	0	0	0	0	0	0	0	0	0	0	0	0	0	0	0	0	0	0	0	0	0	0	0	0	0	0	0	0	0	0	0	0	0	0	0	0	0	0	0	0	0	0	0	0	0	0	0	0	0
country, state or floristic zone:Takhtajan Floristic Region:27. Andean Region	0	0	0	0	0	0	0	0	0	0	0	0	0	0	0	0	0	0	0	0	0	0	0	0	0	0	0	0	0	0	0	0	0	0	0	0	0	0	0	0	0	0	0	0	0	0	0	0	0
country, state or floristic zone:Takhtajan Floristic Region:28. Cape Region	0	0	0	0	0	1	0	0	0	0	0	0	0	0	0	0	0	0	0	0	0	0	0	0	0	0	0	0	0	0	0	0	0	0	0	0	0	0	0	0	0	0	0	0	0	0	0	0	0
country, state or floristic zone:Takhtajan Floristic Region:29. Northeast Australian Region	0	0	0	0	0	0	0	0	0	0	0	0	0	0	0	0	0	0	0	0	0	0	0	0	0	0	0	0	0	0	0	0	0	0	0	0	0	0	0	0	0	0	0	0	0	0	0	0	0
country, state or floristic zone:Takhtajan Floristic Region:30. Southwest Australian Region	0	0	0	0	0	0	0	0	0	0	0	0	0	0	0	0	0	0	0	0	0	0	0	0	0	0	0	0	0	0	0	0	0	0	0	0	0	0	0	0	0	0	0	0	0	0	0	0	0
country, state or floristic zone:Takhtajan Floristic Region:31. Central Australian Region	0	0	0	0	0	0	0	0	0	0	0	0	0	0	0	0	0	0	0	0	0	0	0	0	0	0	0	0	0	0	0	0	0	0	0	0	0	0	0	0	0	0	0	0	0	0	0	0	0
country, state or floristic zone:Takhtajan Floristic Region:32. Fernandezian Region	0	0	0	0	0	0	0	0	0	0	0	0	0	0	0	0	0	0	0	0	0	0	0	0	0	0	0	0	0	0	0	0	0	0	0	0	0	0	0	0	0	0	0	0	0	0	0	0	0
country, state or floristic zone:Takhtajan Floristic Region:33. Chile-Patagonian Region	0	0	0	0	0	0	0	0	0	0	0	0	0	0	0	0	0	0	0	0	0	0	0	0	0	0	0	0	0	0	0	0	0	0	0	0	0	0	0	0	0	0	0	0	0	0	0	0	0
country, state or floristic zone:Takhtajan Floristic Region:34. South Subantartic Islands Region	0	0	0	0	0	0	0	0	0	0	0	0	0	0	0	0	0	0	0	0	0	0	0	0	0	0	0	0	0	0	0	0	0	0	0	0	0	0	0	0	0	0	0	0	0	0	0	0	0
country, state or floristic zone:Takhtajan Floristic Region:35. Neozeylandic Region	0	0	0	0	0	0	0	0	0	0	0	0	0	0	0	0	0	0	0	0	0	0	0	0	0	0	0	0	0	0	0	0	0	0	0	0	0	0	0	0	0	0	0	0	0	0	0	0	0
country, state or floristic zone:Takhtajan Floristic Province:Avoid or use later	1	1	1	1	1	1	1	1	1	1	1	1	1	1	1	1	1	1	1	1	1	1	1	1	1	1	1	1	1	1	1	1	1	1	1	1	1	1	1	1	1	1	1	1	1	1	1	1	1
country, state or floristic zone:Takhtajan Floristic Province:3a. Appalachian Province	0	1	0	0	0	1	0	0	1	1	0	1	1	0	0	1	0	1	0	1	0	0	0	1	0	0	1	0	0	0	0	1	0	0	1	0	1	0	1	1	0	1	1	1	0	0	1	1	0
country, state or floristic zone:Takhtajan Floristic Province:1a. Arctic Province	0	0	0	0	0	0	0	1	1	0	0	0	0	0	0	1	0	0	0	1	0	0	0	1	0	0	0	0	0	0	0	1	1	0	1	0	1	0	1	1	1	0	0	1	0	0	1	1	1
country, state or floristic zone:Takhtajan Floristic Province:3b. Atlantic and Gulf Coastal Plain Province	0	1	1	0	0	0	0	0	0	1	0	1	1	0	0	1	0	1	0	1	0	0	0	0	0	0	1	0	0	0	0	1	0	0	1	0	0	0	1	0	0	1	1	1	0	0	0	0	1
country, state or floristic zone:Takhtajan Floristic Province:9b. Californian Province	1	0	0	0	0	0	0	0	0	0	0	0	0	0	0	0	1	0	1	0	0	1	0	0	0	0	0	1	1	1	0	0	0	0	0	0	1	0	0	1	0	0	0	0	0	0	0	1	1
country, state or floristic zone:Takhtajan Floristic Province:1b. Canadian Province	0	0	0	0	0	1	0	1	1	0	0	1	1	0	0	1	0	0	0	1	0	0	0	1	0	0	1	0	0	0	0	1	1	1	1	0	1	0	1	1	1	0	0	1	0	0	1	1	1
country, state or floristic zone:Takhtajan Floristic Province:23a. Central American Province	0	0	0	0	0	0	0	0	0	0	0	0	0	0	0	0	0	0	0	0	0	0	0	0	0	0	0	0	0	0	1	0	0	0	0	0	0	0	0	0	0	0	0	0	0	0	0	0	0
country, state or floristic zone:Takhtajan Floristic Province:9a. Great Basin Province	1	0	0	0	0	0	0	0	0	0	0	0	0	0	0	0	0	0	1	0	0	1	0	0	0	0	0	0	1	1	0	0	0	0	0	0	1	1	0	1	0	1	0	0	0	0	0	1	1
country, state or floristic zone:Takhtajan Floristic Province:9d. Mexican Highlands Province	0	0	0	0	0	0	0	0	0	0	0	0	0	0	0	0	0	0	0	0	0	0	0	0	0	0	0	0	0	0	1	0	0	0	0	0	0	0	0	0	0	0	0	0	0	1	0	0	0
country, state or floristic zone:Takhtajan Floristic Province:3c. North American Prairies Province	0	1	0	0	0	0	0	0	1	0	0	1	1	0	0	1	0	1	1	1	0	0	0	1	0	0	1	0	1	1	0	1	0	1	0	0	1	1	1	1	0	0	1	1	0	0	1	1	1
country, state or floristic zone:Takhtajan Floristic Province:4b. Rocky Mountain Province	1	0	0	0	0	0	0	1	1	0	0	0	0	0	0	0	0	0	1	0	0	0	0	0	0	0	0	0	1	1	0	0	1	1	0	0	1	1	0	1	1	0	0	0	0	0	0	1	1
country, state or floristic zone:Takhtajan Floristic Province:9c. Sonoran Province	1	0	0	0	0	0	0	0	0	0	0	0	1	0	0	1	1	1	1	0	0	1	0	0	0	0	1	1	1	1	0	1	0	0	0	0	1	0	0	1	0	0	1	0	0	1	0	1	1
country, state or floristic zone:Takhtajan Floristic Province:4a. Vancouverian Province	1	0	0	0	0	0	0	1	0	0	0	0	0	0	0	0	1	0	1	0	0	1	0	1	0	0	0	1	1	1	0	0	1	1	0	0	1	0	0	1	1	1	0	1	0	0	0	1	1
country, state or floristic zone:Takhtajan Floristic Province:23b. West Indian Province	0	1	0	0	0	0	0	0	0	0	0	0	0	0	0	0	0	0	0	0	0	0	0	0	0	0	0	0	0	0	0	0	0	0	0	0	0	0	0	0	0	0	0	0	0	0	0	0	0
Carex section:Avoid or use later	1	1	1	1	1	1	1	1	1	1	1	1	1	1	1	1	1	1	1	1	1	1	1	1	1	1	1	1	1	1	1	1	1	1	1	1	1	1	1	1	1	1	1	1	1	1	1	1	1
Carex section:Aciculares	0	0	0	0	0	0	0	0	0	0	0	0	0	0	0	0	0	0	0	0	0	0	0	0	0	0	0	0	0	0	0	0	0	0	0	0	0	0	0	0	0	0	0	0	0	0	0	0	0
Carex section:Acrocystis	0	0	0	0	0	0	0	0	0	0	0	0	0	0	0	1	0	0	0	0	0	0	0	0	0	1	0	0	0	0	0	0	0	0	0	0	0	0	0	0	0	0	0	0	0	0	0	0	0
Carex section:Albae	0	0	0	0	0	0	0	0	0	0	0	0	0	1	0	0	0	0	0	0	0	0	0	0	0	0	0	0	0	0	0	0	0	0	0	0	0	0	0	0	0	0	0	0	0	0	0	0	0
Carex section:Ammoglochin	0	0	0	0	0	0	0	0	0	0	0	0	0	0	0	0	0	0	0	0	0	0	0	0	0	0	0	0	0	0	0	0	0	0	0	0	0	0	0	0	0	1	0	0	0	0	0	0	0
Carex section:Anomalae	0	0	0	0	0	0	0	0	0	0	0	0	0	0	0	0	0	0	0	0	0	0	0	0	0	0	0	0	1	0	0	0	0	0	0	0	0	0	0	0	0	0	0	0	0	0	0	0	0
Carex section:Aulocystis	0	0	0	0	0	0	0	0	0	0	0	0	0	0	0	0	1	0	0	0	0	0	0	0	0	0	0	0	0	0	0	0	0	0	0	0	0	0	0	0	0	0	0	0	0	0	0	0	0
Carex section:Baldenses*	0	0	0	0	0	0	0	0	0	0	0	0	0	0	0	0	0	0	0	0	0	0	0	0	0	0	0	0	0	0	0	0	0	0	0	0	0	0	0	0	0	0	0	0	0	0	0	0	0
Carex section:Bicolores	0	0	0	0	0	0	0	0	0	0	0	0	0	0	0	0	0	0	0	0	0	0	0	0	0	0	0	0	0	0	0	0	0	0	0	0	0	0	0	0	0	0	0	0	0	0	0	0	0
Carex section:Capituligerae	0	0	0	0	0	0	0	0	0	0	0	0	0	0	0	0	0	0	0	0	0	0	0	0	0	0	0	0	0	0	0	0	0	0	0	0	0	0	0	0	0	0	0	0	0	0	0	0	0
Carex section:Carex	0	0	0	0	0	0	0	0	0	0	0	0	0	0	0	0	0	0	0	0	0	0	0	0	0	0	0	0	0	0	0	0	0	0	0	0	0	0	0	0	0	0	0	0	0	0	0	1	0
Carex section:Careyanae (use with Laxiflorae)	0	1	0	0	0	0	0	0	0	0	0	0	0	0	0	0	0	0	0	0	0	0	0	0	0	0	0	0	0	0	0	0	0	0	0	0	0	0	0	0	0	0	0	0	0	0	0	0	0
Carex section:Ceratocystis	0	0	0	0	0	0	0	0	0	0	0	0	0	0	0	0	0	0	0	0	0	0	0	0	0	0	0	0	0	0	0	0	0	0	0	0	0	0	0	0	0	0	0	0	0	0	0	0	0
Carex section:Chlorostachyae	0	0	0	0	0	0	0	0	0	0	0	0	0	0	0	0	0	0	0	0	0	0	0	0	0	0	0	0	0	0	0	0	0	0	0	0	0	0	0	0	0	0	0	0	0	0	0	0	0
Carex section:Chordorrhizae	0	0	0	0	0	0	0	0	0	0	0	0	0	0	0	0	0	0	0	0	0	0	0	0	0	0	0	0	0	0	0	0	0	0	0	0	0	0	0	0	0	0	0	0	0	0	0	0	0
Carex section:Circinatae	0	0	0	0	0	0	0	0	0	0	0	0	0	0	0	0	0	0	0	0	0	0	0	0	0	0	0	0	0	0	0	0	1	0	0	0	0	0	0	0	0	0	0	0	0	0	0	0	0
Carex section:Clandestinae	0	0	0	0	0	0	0	0	0	0	0	0	0	0	0	0	0	0	0	0	0	0	0	0	0	0	0	0	0	0	0	0	0	0	0	0	0	0	0	0	0	0	0	0	0	0	0	0	0
Carex section:Collinsinae	0	0	0	0	0	0	0	0	0	0	0	0	0	0	0	0	0	0	0	0	0	0	0	0	0	0	0	0	0	0	0	0	0	0	0	0	0	0	0	0	0	0	0	0	0	0	0	0	0
Carex section:Confertiflorae	0	0	0	0	0	0	0	0	0	0	0	0	0	0	0	0	0	0	0	0	0	0	0	0	0	0	0	0	0	0	0	0	0	0	0	0	0	0	0	0	0	0	0	0	0	0	0	0	0
Carex section:Cyperoideae	0	0	0	0	0	0	0	0	0	0	0	0	0	0	0	0	0	0	0	0	0	0	0	0	0	0	0	0	0	0	0	0	0	0	0	0	0	0	0	0	0	0	0	0	0	0	0	0	0
Carex section:Decorae	0	0	0	0	0	0	0	0	0	0	0	0	0	0	0	0	0	0	0	0	0	0	0	0	0	0	0	0	0	0	0	0	0	0	0	0	0	0	0	0	0	0	0	0	0	0	0	0	0
Carex section:Deweyanae	0	0	0	0	0	0	0	0	0	0	0	0	0	0	0	0	0	0	0	0	0	0	0	0	0	0	0	0	0	0	0	0	0	0	0	0	0	0	0	0	0	0	0	0	0	0	0	0	0
Carex section:Digitatae	0	0	0	0	0	0	0	0	0	0	0	0	0	0	0	0	0	0	0	0	0	0	0	0	0	0	0	0	0	0	0	0	0	0	0	0	0	0	0	0	0	0	0	0	0	0	0	0	0
Carex section:Dispermae	0	0	0	0	0	0	0	0	0	0	0	0	0	0	0	0	0	0	0	0	0	0	0	0	0	0	0	0	0	0	0	0	0	0	0	0	0	0	0	0	0	0	0	0	0	0	0	0	0
Carex section:Divisae	0	0	0	0	0	0	0	0	0	0	0	0	0	0	0	0	0	0	0	0	0	0	0	0	0	0	0	0	0	0	0	0	0	0	0	0	0	0	0	0	0	0	0	0	0	0	0	0	0
Carex section:Dornera	0	0	0	0	0	0	0	0	0	0	0	0	0	0	0	0	0	0	0	0	0	0	0	0	0	0	0	0	0	0	0	0	0	0	0	0	0	0	0	0	0	0	0	0	0	0	0	0	0
Carex section:Elatae	0	0	0	0	0	0	0	0	0	0	0	0	0	0	0	0	0	0	0	0	0	0	0	0	0	0	0	0	0	0	0	0	0	0	0	0	0	0	0	0	0	0	0	0	0	0	0	0	0
Carex section:Elongatae*	0	0	0	0	0	0	0	0	0	0	0	0	0	0	0	0	0	0	0	0	0	0	0	0	0	0	0	0	0	0	0	0	0	0	0	0	0	0	0	0	0	0	0	0	0	0	0	0	0
Carex section:Fecundae	0	0	0	0	0	0	0	0	0	0	0	0	0	0	0	0	0	0	0	0	0	0	0	0	0	0	0	0	0	0	0	0	0	0	0	0	0	0	0	0	0	0	0	0	0	0	0	0	0
Carex section:Ferrugineae	0	0	0	0	0	0	0	0	0	0	0	0	0	0	0	0	0	0	0	0	0	0	0	0	0	0	0	0	0	0	0	0	0	0	0	0	0	0	0	0	0	0	0	0	0	0	0	0	0
Carex section:Filifoliae	0	0	0	0	0	0	0	0	0	0	0	0	0	0	0	0	0	0	0	0	0	0	0	0	0	0	0	0	0	0	0	0	0	0	0	0	0	0	0	0	0	0	0	0	0	1	0	0	0
Carex section:Firmiculmes	0	0	0	0	0	0	0	0	0	0	0	0	0	0	0	0	0	0	0	0	0	0	0	0	0	0	0	0	0	0	0	0	0	0	0	0	0	0	0	0	0	0	0	0	0	0	0	0	0
Carex section:Foetidae	0	0	0	0	0	0	0	0	0	0	0	0	0	0	0	0	0	0	0	0	0	0	0	0	0	0	0	0	0	0	0	0	0	0	0	0	0	0	0	0	0	0	0	0	0	0	0	0	0
Carex section:Forficulae	0	0	0	0	0	0	0	0	0	0	0	0	0	0	0	0	0	0	0	0	0	0	0	0	0	0	0	0	0	0	0	0	0	0	0	0	0	0	0	0	0	0	0	0	0	0	0	0	0
Carex section:Fuliginosae	0	0	0	0	0	0	0	0	0	0	0	0	0	0	0	0	0	0	0	0	0	0	0	0	0	0	0	0	0	0	0	0	0	0	0	0	0	0	0	0	0	0	0	0	0	0	0	0	0
Carex section:Glarosae	0	0	0	0	0	0	0	0	0	0	0	0	0	0	0	0	0	0	0	0	0	0	0	0	0	0	0	0	0	0	0	0	0	0	0	0	0	0	0	1	1	0	0	0	0	0	0	0	0
Carex section:Glaucescentes	0	0	0	0	0	0	0	0	0	0	0	0	0	0	0	0	0	0	0	0	0	0	0	0	0	0	0	0	0	0	0	0	0	0	0	0	0	0	0	0	0	0	0	0	0	0	0	0	0
Carex section:Graciles*	0	0	0	0	0	0	0	0	0	0	0	0	0	0	0	0	0	0	0	0	0	0	0	0	0	0	0	0	0	0	0	0	0	0	0	0	0	0	0	0	0	0	0	0	0	0	0	0	0
Carex section:Granulares	0	0	0	0	0	0	0	0	0	0	0	0	0	0	0	0	0	0	0	0	0	0	0	0	0	0	0	0	0	0	0	0	0	0	0	0	0	0	0	0	0	0	0	0	0	0	0	0	0
Carex section:Griseae	0	0	1	0	0	0	0	0	0	0	0	0	0	0	0	0	0	0	0	0	0	0	0	0	0	0	1	0	0	0	0	0	0	0	0	0	0	0	0	0	0	0	0	0	0	0	0	0	0
Carex section:Hallaraniae	0	0	0	0	0	0	0	0	0	0	0	0	0	0	0	0	0	0	0	0	0	0	0	0	0	0	0	0	0	0	0	0	0	0	0	0	0	0	0	0	0	0	0	0	0	0	0	0	0
Carex section:Heleoglochin	0	0	0	0	0	0	0	0	0	0	0	0	0	0	0	0	0	0	0	0	0	0	0	0	0	0	0	0	0	0	0	0	0	0	0	1	0	0	0	0	0	0	0	0	0	0	0	0	0
Carex section:Hirtifoliae	0	0	0	0	0	0	0	0	0	0	0	0	0	0	0	0	0	0	0	0	0	0	0	0	0	0	0	0	0	0	0	0	0	0	0	0	0	0	0	0	0	0	0	0	0	0	0	0	0
Carex section:Hispidae	0	0	0	0	0	0	0	0	0	0	0	0	0	0	0	0	0	0	0	0	0	0	0	0	0	0	0	0	0	0	0	0	0	0	0	0	0	0	0	0	0	0	0	0	0	0	0	0	0
Carex section:Holarrhenae	0	0	0	0	0	0	0	0	0	0	0	0	0	0	0	0	0	0	0	0	0	0	0	0	0	0	0	0	0	0	0	0	0	0	0	0	0	0	0	0	0	0	0	0	0	0	0	0	0
Carex section:Hymenochalanae	0	0	0	0	0	0	0	0	0	1	0	0	0	0	0	0	0	0	0	0	0	0	0	0	0	0	0	0	0	0	0	0	0	0	0	0	0	0	1	0	0	0	0	0	1	0	1	0	0
Carex section:Indicae	0	0	0	0	0	0	0	0	0	0	0	0	0	0	0	0	0	0	0	0	0	0	0	0	0	0	0	0	0	0	0	0	0	0	0	0	0	0	0	0	0	0	0	0	0	0	0	0	0
Carex section:Inflatae	0	0	0	0	0	0	0	0	0	0	0	0	0	0	0	0	0	0	0	0	0	0	0	0	0	0	0	0	0	0	0	0	0	0	0	0	0	0	0	0	0	0	0	0	0	0	0	0	0
Carex section:Lamprochlaenae	0	0	0	0	0	0	0	0	0	0	0	0	0	0	0	0	0	0	0	0	0	0	0	0	0	0	0	0	0	0	0	0	0	0	0	0	0	0	0	0	0	0	0	0	0	0	0	0	0
Carex section:Laxiflorae (use with Careyanae)	0	0	0	0	0	0	0	0	0	0	0	0	0	0	0	0	0	0	0	1	0	0	0	0	0	0	0	0	0	0	0	0	0	0	0	0	0	0	0	0	0	0	0	0	0	0	0	0	0
Carex section:Leptocephalae	0	0	0	0	0	0	0	0	0	0	0	0	0	0	0	0	0	0	0	0	0	0	0	0	0	0	0	0	0	0	0	0	0	0	0	0	0	0	0	0	0	0	0	0	0	0	0	0	0
Carex section:Leucoglochin	0	0	0	0	0	0	0	0	0	0	0	0	0	0	0	0	0	0	0	0	0	0	0	0	0	0	0	0	0	0	0	0	0	0	0	0	0	0	0	0	0	0	0	0	0	0	0	0	0
Carex section:Limosae	0	0	0	0	0	0	0	0	0	0	0	0	0	0	0	0	0	0	0	0	0	0	0	0	0	0	0	0	0	0	0	0	0	0	0	0	0	0	0	0	0	0	0	0	0	0	0	0	0
Carex section:Longicaules	0	0	0	0	0	0	0	0	0	0	0	0	0	0	0	0	0	0	0	0	0	0	0	0	0	0	0	0	0	0	1	0	0	0	0	0	0	0	0	0	0	0	0	0	0	0	0	0	0
Carex section:Luplinae	0	0	0	0	0	0	0	0	0	0	0	0	0	0	0	0	0	0	0	0	0	0	0	0	0	0	0	0	0	0	0	0	0	0	0	0	0	0	0	0	0	0	0	0	0	0	0	0	0
Carex section:Macrocephalae	0	0	0	0	0	0	0	0	0	0	0	0	0	0	0	0	0	0	0	0	0	0	0	0	0	0	0	0	0	0	0	0	0	0	0	0	0	0	0	0	0	0	0	0	0	0	0	0	0
Carex section:Mitratae	0	0	0	0	0	0	0	0	0	0	0	0	0	0	0	0	0	0	0	0	0	0	0	0	0	0	0	0	0	0	0	0	0	0	0	0	0	0	0	0	0	0	0	0	0	0	0	0	0
Carex section:Molliculae	0	0	0	0	0	0	0	0	0	0	1	0	0	0	0	0	0	0	0	0	1	0	0	0	1	0	0	0	0	0	0	0	0	0	0	0	0	0	0	0	0	0	0	0	0	0	0	0	0
Carex section:Multiflorae	0	0	0	0	0	0	0	0	0	0	0	0	0	0	0	0	0	0	0	0	0	1	0	0	0	0	0	0	0	0	0	1	0	0	0	0	0	0	0	0	0	0	0	0	0	0	0	0	0
Carex section:Nardinae	0	0	0	0	0	0	0	0	0	0	0	0	0	0	0	0	0	0	0	0	0	0	0	0	0	0	0	0	0	0	0	0	0	0	0	0	0	0	0	0	0	0	0	0	0	0	0	0	0
Carex section:Obtusatae	0	0	0	0	0	0	0	0	0	0	0	0	0	0	0	0	0	0	0	0	0	0	0	0	0	0	0	0	0	0	0	0	0	0	0	0	0	0	0	0	0	0	0	0	0	0	0	0	0
Carex section:Ovales	1	0	0	0	0	0	0	0	1	0	0	0	1	0	0	0	0	1	0	0	0	0	0	0	0	0	0	1	0	0	0	0	0	0	0	0	0	1	0	0	0	0	0	1	0	0	0	0	1
Carex section:Paludosae	0	0	0	0	0	1	0	0	0	0	0	0	0	0	0	0	0	0	0	0	0	0	0	0	0	0	0	0	0	0	0	0	0	0	0	0	0	0	0	0	0	0	0	0	0	0	0	0	0
Carex section:Paniceae	0	0	0	0	0	0	0	0	0	0	0	0	0	0	0	0	0	0	0	0	0	0	0	0	0	0	0	0	0	0	0	0	0	0	0	0	0	0	0	0	0	0	0	0	0	0	0	0	0
Carex section:Phacocytis	0	0	0	1	1	0	0	0	0	0	0	0	0	0	0	0	0	0	0	0	0	0	1	0	0	0	0	0	0	1	0	0	0	1	0	0	1	0	0	0	0	0	0	0	0	0	0	0	0
Carex section:Phaestoglochin	0	0	0	0	0	0	0	0	0	0	0	1	0	0	0	0	0	0	0	0	0	0	0	0	0	0	0	0	0	0	0	0	0	0	1	0	0	0	0	0	0	0	1	0	0	0	0	0	0
Carex section:Phleoideae	0	0	0	0	0	0	0	0	0	0	0	0	0	0	1	0	0	0	0	0	0	0	0	0	0	0	0	0	0	0	0	0	0	0	0	0	0	0	0	0	0	0	0	0	0	0	0	0	0
Carex section:Phyllostachyae	0	0	0	0	0	0	0	0	0	0	0	0	0	0	0	0	0	0	0	0	0	0	0	0	0	0	0	0	0	0	0	0	0	0	0	0	0	0	0	0	0	0	0	0	0	0	0	0	0
Carex section:Physoglochin	0	0	0	0	0	0	0	0	0	0	0	0	0	0	0	0	0	0	0	0	0	0	0	0	0	0	0	0	0	0	0	0	0	0	0	0	0	0	0	0	0	0	0	0	0	0	0	0	0
Carex section:Pictae	0	0	0	0	0	0	0	0	0	0	0	0	0	0	0	0	0	0	0	0	0	0	0	0	0	0	0	0	0	0	0	0	0	0	0	0	0	0	0	0	0	0	0	0	0	0	0	0	0
Carex section:Porocystis	0	0	0	0	0	0	0	0	0	0	0	0	0	0	0	0	0	0	0	0	0	0	0	0	0	0	0	0	0	0	0	0	0	0	0	0	0	0	0	0	0	0	0	0	0	0	0	0	0
Carex section:Polystachyae	0	0	0	0	0	0	0	0	0	0	0	0	0	0	0	0	0	0	0	0	0	0	0	0	0	0	0	0	0	0	0	0	0	0	0	0	0	0	0	0	0	0	0	0	0	0	0	0	0
Carex section:Praelongae	0	0	0	0	0	0	0	0	0	0	0	0	0	0	0	0	0	0	0	0	0	0	0	0	0	0	0	0	0	0	0	0	0	0	0	0	0	0	0	0	0	0	0	0	0	0	0	0	0
Carex section:Racemosae	0	0	0	0	0	0	0	1	0	0	0	0	0	0	0	0	0	0	1	0	0	0	0	0	0	0	0	0	0	0	0	0	0	0	0	0	0	0	0	0	0	0	0	0	0	0	0	0	0
Carex section:Remotae	0	0	0	0	0	0	0	0	0	0	0	0	0	0	0	0	0	0	0	0	0	0	0	0	0	0	0	0	0	0	0	0	0	0	0	0	0	0	0	0	0	0	0	0	0	0	0	0	0
Carex section:Rhomboidales	0	0	0	0	0	0	0	0	0	0	0	0	0	0	0	0	0	0	0	0	0	0	0	0	0	0	0	0	0	0	0	0	0	0	0	0	0	0	0	0	0	0	0	0	0	0	0	0	0
Carex section:Rhynchocystis	0	0	0	0	0	0	0	0	0	0	0	0	0	0	0	0	0	0	0	0	0	0	0	0	0	0	0	0	0	0	0	0	0	0	0	0	0	0	0	0	0	0	0	0	0	0	0	0	0
Carex section:Rostrales	0	0	0	0	0	0	0	0	0	0	0	0	0	0	0	0	0	0	0	0	0	0	0	0	0	0	0	0	0	0	0	0	0	0	0	0	0	0	0	0	0	0	0	0	0	0	0	0	0
Carex section:Rupestres	0	0	0	0	0	0	0	0	0	0	0	0	0	0	0	0	0	0	0	0	0	0	0	0	0	0	0	0	0	0	0	0	0	0	0	0	0	0	0	0	0	0	0	0	0	0	0	0	0
Carex section:Schneideanae	0	0	0	0	0	0	0	0	0	0	0	0	0	0	0	0	0	0	0	0	0	0	0	0	0	0	0	0	0	0	0	0	0	0	0	0	0	0	0	0	0	0	0	0	0	0	0	0	0
Carex section:Scripinae	0	0	0	0	0	0	0	0	0	0	0	0	0	0	0	0	0	0	0	0	0	0	0	0	0	0	0	0	0	0	0	0	0	0	0	0	0	0	0	0	0	0	0	0	0	0	0	0	0
Carex section:Scitae	0	0	0	0	0	0	0	0	0	0	0	0	0	0	0	0	0	0	0	0	0	0	0	0	0	0	0	0	0	0	0	0	0	0	0	0	0	0	0	0	0	0	0	0	0	0	0	0	0
Carex section:Secalinae	0	0	0	0	0	0	0	0	0	0	0	0	0	0	0	0	0	0	0	0	0	0	0	0	0	0	0	0	0	0	0	0	0	0	0	0	0	0	0	0	0	0	0	0	0	0	0	0	0
Carex section:Shortianae	0	0	0	0	0	0	0	0	0	0	0	0	0	0	0	0	0	0	0	0	0	0	0	0	0	0	0	0	0	0	0	0	0	0	0	0	0	0	0	0	0	0	0	0	0	0	0	0	0
Carex section:Spirostachyae	0	0	0	0	0	0	0	0	0	0	0	0	0	0	0	0	0	0	0	0	0	0	0	0	0	0	0	0	0	0	0	0	0	0	0	0	0	0	0	0	0	0	0	0	0	0	0	0	0
Carex section:Squarrosae	0	0	0	0	0	0	0	0	0	0	0	0	0	0	0	0	0	0	0	0	0	0	0	0	0	0	0	0	0	0	0	0	0	0	0	0	0	0	0	0	0	0	0	0	0	0	0	0	0
Carex section:Stellulatae	0	0	0	0	0	0	0	0	0	0	0	0	0	0	0	0	0	0	0	0	0	0	0	0	0	0	0	0	0	0	0	0	0	0	0	0	0	0	0	0	0	0	0	0	0	0	0	0	0
Carex section:Thuringiaca	0	0	0	0	0	0	0	0	0	0	0	0	0	0	0	0	0	0	0	0	0	0	0	0	0	0	0	0	0	0	0	0	0	0	0	0	0	0	0	0	0	0	0	0	0	0	0	0	0
Carex section:Triquetrae	0	0	0	0	0	0	0	0	0	0	0	0	0	0	0	0	0	0	0	0	0	0	0	0	0	0	0	0	0	0	0	0	0	0	0	0	0	0	0	0	0	0	0	0	0	0	0	0	0
Carex section:Unciniiformes	0	0	0	0	0	0	0	0	0	0	0	0	0	0	0	0	0	0	0	0	0	0	0	0	0	0	0	0	0	0	0	0	0	0	0	0	0	0	0	0	0	0	0	0	0	0	0	0	0
Carex section:Vesicariae	0	0	0	0	0	0	0	0	0	0	0	0	0	0	0	0	0	0	0	0	0	0	0	0	0	0	0	0	0	0	0	0	0	0	0	0	0	0	0	0	0	0	0	0	0	0	0	0	0
Carex section:Vulpinae	0	0	0	0	0	0	0	0	0	0	0	0	0	0	0	0	0	0	0	0	0	0	0	1	0	0	0	0	0	0	0	0	0	0	0	0	0	0	0	0	0	0	0	0	0	0	0	0	0
sexuality of plant:pistillate	0	0	0	0	0	0	0	0	0	0	0	0	0	0	0	0	0	0	0	0	0	0	0	0	0	0	0	0	0	0	0	0	1	0	0	0	0	0	0	0	0	0	0	0	0	0	0	0	0
sexuality of plant:staminate	0	0	0	0	0	0	0	0	0	0	0	0	0	0	0	0	0	0	0	0	0	0	0	0	0	0	0	0	0	0	0	0	1	0	0	0	0	0	0	0	0	0	0	0	0	0	0	0	0
sexuality of plant:bisexual	1	1	1	1	1	1	1	1	1	1	1	1	1	1	1	1	1	1	1	1	1	1	1	1	1	1	1	1	1	1	1	1	4	1	1	1	1	1	1	1	1	1	1	1	1	1	1	1	1
roots with dense yellow indumentum:absent	6	6	6	6	6	6	1	6	6	6	1	6	6	0	6	6	6	6	6	6	6	6	6	6	0	0	6	6	6	6	6	6	6	6	6	6	6	6	6	6	6	6	6	6	6	6	6	6	6
roots with dense yellow indumentum:present	6	6	6	6	6	6	0	6	6	6	0	6	6	0	6	6	6	6	6	6	6	6	6	6	0	0	6	6	6	6	6	6	6	6	6	6	6	6	6	6	6	6	6	6	6	6	6	6	6
culm:height#	1:18.0:18.0:66.0:66.0	1:7.0:7.0:30.0:30.0	1:11.0:11.0:41.0:41.0	1:30.0:30.0:120.0:150.0	1:30.0:35.0:75.0:85.0	1:55.0:55.0:130.0:130.0	1:30:30:50:50	1:20.0:20.0:35.0:35.0	1:25.0:25.0:80.0:80.0	1:25.0:25.0:60.0:60.0	1:15.0:25.0:45.0:60.0	1:20.0:30.0:100.0:100.0	1:30.0:30.0:140.0:140.0	1:5.0:10.0:18.0:30.0	1:15.0:30.0:45.0:60.0	1:10.0:10.0:45.0:45.0	1:10.0:10.0:60.0:60.0	1:25.0:25.0:120.0:120.0	1:10.0:10.0:30.0:30.0	1:10.0:10.0:62.0:62.0	1:15.0:25.0:45.0:50.0	1:10.0:10.0:90.0:90.0	1:60:60:150:150	1:4.0:4.0:80.0:80.0	1:10.0:15.0:50.0:60.0	1:10.0:15.0:35.0:40.0	1:15.0:15.0:80.0:80.0	1:30.0:30.0:90.0:90.0	1:50.0:50.0:130.0:130.0	1:30.0:30.0:110.0:110.0	1:15.0:15.0:90.0:90.0	1:3.0:3.0:100.0:100.0	1:5.0:5.0:40.0:40.0	1:15.0:15.0:90.0:90.0	1:20.0:20.0:60.0:60.0	1:30.0:30.0:80.0:100.0	1:5.0:20.0:150.0:150.0	1:20.0:20.0:30.0:30.0	1:20.0:20.0:100.0:100.0	1:15.0:15.0:80.0:80.0	1:15.0:15.0:50.0:50.0	1:15.0:15.0:60.0:60.0	1:15.0:15.0:60.0:60.0	1:30.0:30.0:100.0:100.0	1:20.0:25.0:90.0:95.0	1:25.0:25.0:60.0:60.0	1:35.0:35.0:75.0:75.0	1:35.0:35.0:125.0:125.0	1:5.0:5.0:80.0:80.0
culm:width#	6	1:0.20:0.20:0.5:0.5	1:3.2:4.1:7.4:7.4	3	3	6	3	6	6	1:0.50:0.50:0.70:0.70	3	1:1.5:1.5:3.5:3.5	6	3	3	6	6	6	6	1:2.0:2.0:2.40:2.40	3	1:1.80:1.80:2.20:2.20	3	1:2.0:3.0:4.0:4.0	3	3	6	6	6	6	6	1:2.0:2.0:4.5:4.5	6	6	6	3	6	6	1:0.60:0.60:1.0:1.0	6	6	6	1:0.70:0.70:2.0:2.0	6	3	6	1:0.5:0.5:0.80:0.80	6	6
leaf sheath length#	6	1:1.0:1.0:4.0:4.0	6	6	3	6	3	6	6	6	3	6	6	3	3	6	6	6	6	1:2.0:2.0:15.0:15.0	6	6	6	6	6	3	6	6	6	6	6	6	6	6	6	6	6	6	6	6	6	6	6	6	6	6	6	6	6
leaf ligule length#	6	6	3	3	3	1:5.0:5.0:14.0:14.0	3	6	6	6	3	1:1.0:1.0:4.5:4.5	6	3	3	6	6	6	6	6	3	1:0.10:0.10:1.0:1.0	3	1:0.10:0.10:5.0:5.0	3	3	6	6	1:3.0:3.0:65.0:65.0	6	6	1:0.0:0.0:3.0:3.0	6	6	1:0.10:0.10:1.90:1.90	3	6	6	6	6	6	1:1.5:1.5:2.20:2.20	1:0.10:0.10:1.5:1.5	6	3	6	6	1:6.0:6.0:45.0:45.0	6
distal leaf ligule length#	1:1.0:1.0:3.0:4.5	6	6	6	6	6	3	6	1:1.0:1.0:4.0:4.0	6	6	6	1:2.80:2.80:8.0:8.0	6	6	6	6	1:1.5:1.5:4.5:4.5	6	6	6	6	6	6	6	0	6	1:1.5:1.5:4.5:4.5	6	6	6	6	6	6	6	6	6	1:1.0:1.0:2.5:2.5	6	6	6	6	6	1:3.5:3.5:5.0:5.0	6	6	6	6	1:1.0:1.0:5.0:5.0
blade:width#	1:1.5:1.5:3.7:4.90	1:3.0:3.0:9.0:9.0	1:3.7:4.3:5.5:5.5	1:3.0:3.0:5.0:10.0	1:2.3:2.4:3.7:3.8	1:4.5:4.5:20.0:20.0	1:22:22:23:23	1:2.0:2.0:3.0:3.0	1:2.0:2.0:3.5:3.5	1:1.5:1.5:3.0:3.0	1:1.5:2.0:4.0:6.0	1:3.5:3.5:5.0:5.0	1:2.5:2.5:6.0:6.0	1:0.6:0.9:1.2:1.3	1:1.0:1.5:2.0:3.0	1:0.80:0.80:2.5:2.5	1:3.0:3.0:6.0:6.0	1:2.0:2.0:3.5:3.5	1:2.5:2.5:5.0:5.0	1:10.0:10.0:38.0:38.0	1:5.0:7.0:12.0:14.0	1:1.0:1.0:6.0:6.0	1:8.00:8.00:15.0:15.0	1:1.0:1.0:7.0:7.0	1:1.9:2.0:6.0:7.0	1:0.8:1.0:1.5:2.0	1:3.70:3.70:7.0:7.0	1:3.0:3.0:6.5:6.5	1:8.0:8.0:23.0:23.0	1:4.0:4.0:7.0:7.0	1:1.0:1.0:3.0:3.0	1:1.0:1.0:5.0:5.0	1:1.5:1.5:2.5:2.5	1:3.0:3.0:6.0:6.0	1:0.5:0.5:1.5:1.5	1:1.0:1.0:3.0:3.0	1:3.0:3.0:7.0:7.0	1:2.20:2.20:3.20:3.20	1:3.0:3.0:13.0:13.0	1:2.0:2.0:4.0:4.0	1:2.0:2.0:4.0:4.0	1:1.5:1.5:4.0:4.0	1:1.0:1.0:2.5:2.5	1:2.0:2.0:5.0:5.0	1:2.9:3.0:4.0:4.1	1:1.5:1.5:2.0:2.0	1:1.0:1.0:3.0:3.0	1:3.0:3.0:10.0:10.0	1:1.5:1.5:5.0:5.0
blade:length#	1:10.0:10.0:30.0:45.0	1:11.0:11.0:38.0:38.0	6	3	1:20.0:30.0:60.0:70.0	6	3	6	1:7.0:7.0:25.0:25.0	6	3	6	1:11.0:11.0:50.0:50.0	3	3	6	6	1:9.0:9.0:25.0:25.0	6	1:10.0:10.0:35.0:35.0	3	1:1.0:1.0:75.0:75.0	3	1:1.0:1.0:60.0:60.0	3	3	6	1:20.0:20.0:45.0:45.0	1:10.0:10.0:80.0:80.0	6	1:5.0:5.0:15.0:15.0	1:1.0:1.0:60.0:60.0	6	6	6	3	6	1:10.0:10.0:40.0:40.0	6	1:15.0:15.0:50.0:50.0	1:10.0:10.0:30.0:30.0	6	6	1:17.0:17.0:37.0:37.0	3	1:1.0:1.0:25.0:25.0	6	6	1:10.0:10.0:20.0:20.0
blade:number per culm#	1:3.0:3.0:6.0:6.0	6	6	6	6	6	3	6	1:2.0:2.0:5.0:5.0	6	6	6	1:3.0:3.0:7.0:7.0	6	6	6	6	1:3.0:3.0:5.0:5.0	6	6	3	6	3	6	3	0	6	1:3.0:3.0:7.0:7.0	6	6	1:5.0:5.0:10.0:10.0	6	6	6	6	6	6	1:3.0:3.0:5.0:5.0	6	6	6	6	6	1:4.0:4.0:5.0:5.0	6	1:2.0:2.0:4.0:4.0	6	6	1:3.0:3.0:5.0:5.0
blade:abaxial surface whether pubescent:glabrous	6	1	1	1	1	6	0	6	1	1	1	1	6	1	1	6	6	6	6	6	1	6	1	6	1	1	6	6	6	6	6	6	6	6	6	1	6	6	1	6	6	6	6	6	1	6	6	0	6
blade:abaxial surface whether pubescent:pubescent to pilose	6	0	0	0	0	6	0	6	0	1	0	0	6	0	0	6	6	6	6	6	0	6	0	6	0	2	6	6	6	6	6	6	6	6	6	0	6	6	0	6	6	6	6	6	0	6	6	1	6
blade:adaxial surface whether pubescent:glabrous	6	1	1	1	1	6	0	6	1	1	1	1	6	1	1	6	6	6	6	6	1	6	1	6	1	2	6	6	6	6	6	6	6	6	6	1	6	6	1	6	6	6	6	6	1	6	1	1	6
blade:adaxial surface whether pubescent:pubescent to pilose	6	0	0	0	0	6	0	6	0	1	0	0	6	0	0	6	6	6	6	6	0	6	0	6	0	1	6	6	6	6	6	6	6	6	6	0	6	6	0	6	6	6	6	6	0	6	0	1	6
blade:adaxial venation:midvein most pronounced	6	0	0	1	6	6	0	6	1	0	1	1	6	1	1	1	6	6	6	0	0	6	0	6	6	0	0	6	6	6	6	6	6	6	6	6	6	6	0	6	6	6	6	6	0	6	0	0	6
blade:adaxial venation:lateral or parallel venation most pronounced	6	1	1	0	6	6	0	6	0	1	0	0	6	0	0	0	6	6	6	1	1	6	0	6	6	2	1	6	6	6	6	6	6	6	6	6	6	6	1	6	6	6	6	6	1	6	1	1	6
blade:shape in cross section:flat	6	1	1	1	1	0	0	1	1	1	1	1	6	1	1	6	6	6	6	1	1	6	0	0	6	2	6	6	6	6	6	6	1	6	6	1	6	6	1	1	1	6	6	6	1	6	1	1	6
blade:shape in cross section:W shaped	6	1	1	0	1	1	0	0	0	1	0	0	6	0	0	6	6	6	6	0	1	6	0	1	6	2	6	6	6	6	6	6	0	6	6	0	6	6	0	0	0	6	6	6	1	6	0	1	6
blade:shape in cross section:C or involute	6	0	0	0	0	0	0	0	0	0	0	0	6	1	0	6	6	6	6	0	0	6	0	0	6	0	6	6	6	6	6	6	0	6	6	0	6	6	0	0	0	6	6	6	0	6	0	0	6
blade:shape in cross section:V shaped	6	0	0	1	1	0	0	1	0	0	1	1	6	0	1	6	6	6	6	0	0	6	0	0	6	0	6	6	6	6	6	6	0	6	6	1	6	6	0	0	0	6	6	6	0	6	0	0	6
blade:shape in cross section:terete	6	0	0	0	0	0	0	0	1	0	0	0	6	1	0	6	6	6	6	0	0	6	0	0	6	0	6	6	6	6	6	6	0	6	6	0	6	6	0	0	0	6	6	6	0	6	0	0	6
bract:proximal bract whether present:absent	0	0	0	0	0	0	0	0	0	0	0	0	0	1	4	0	0	0	0	0	0	0	0	0	0	0	0	0	0	0	0	0	1	0	0	1	0	4	0	0	0	0	0	0	0	4	0	0	0
bract:proximal bract whether present:present	1	1	1	1	1	1	1	1	1	1	1	1	1	1	1	1	1	1	1	1	1	1	1	1	1	1	1	1	1	1	1	1	4	1	1	1	1	1	1	1	1	1	1	1	1	1	1	1	1
bract:proximal bract appearing:bristlelike	1	0	0	0	0	0	1	1	1	0	1	1	1	1	1	1	1	1	0	0	0	1	0	1	0	1	0	1	0	0	0	1	0	0	1	1	0	1	0	1	1	1	1	1	0	1	0	0	1
bract:proximal bract appearing:leaflike	0	1	1	1	1	1	1	1	1	1	1	0	0	0	0	0	0	0	1	1	1	0	1	0	1	0	1	1	1	1	1	0	0	1	0	0	1	0	1	0	0	0	1	0	1	1	1	1	0
bract:proximal bract appearing:scalelike	1	0	0	0	0	0	0	1	1	0	0	1	1	1	1	1	1	1	1	0	0	1	0	1	0	1	0	0	0	0	0	1	0	0	0	1	0	1	0	1	1	1	0	1	0	0	0	0	1
bract:proximal bract width#	6	1:1.5:1.5:4.0:4.0	6	3	1:3.5:4.0:4.5:5.0	6	3	6	6	1:1.0:1.0:2.0:2.0	6	6	6	3	3	6	6	6	6	6	3	6	3	6	3	3	6	6	6	1:3.0:3.0:6.0:6.0	6	6	6	1:2.0:2.0:4.0:4.0	6	3	6	6	6	6	6	6	6	6	3	6	1:1.5:1.5:2.20:2.20	6	6
bract:proximal bract length#	6	1:10.0:10.0:105.0:105.0	6	3	3	6	3	6	6	6	6	1:0.0:0.0:30.0:30.0	6	3	3	6	1:40.0:40.0:125.0:125.0	6	6	6	3	6	1:10.0:10.0:60.0:60.0	6	3	3	6	6	6	6	1:20.0:20.0:40.0:40.0	6	6	6	1:10.0:10.0:110.0:110.0	3	6	6	6	6	6	6	1:60.0:60.0:250.0:250.0	6	3	6	6	6	6
(3) spike arrangement:paniculate	0	0	0	0	0	0	1	0	0	0	0	0	0	0	0	0	0	0	0	0	0	1	0	1	0	0	0	0	0	0	0	1	0	0	0	1	0	0	0	0	0	0	1	0	0	0	0	0	0
(3) spike arrangement:racemose	1	1	1	1	1	1	0	1	1	1	1	1	1	1	1	1	1	1	1	1	1	4	1	1	1	1	1	1	1	1	1	4	1	1	1	1	1	1	1	1	1	1	1	1	1	0	1	1	1
(3) spike arrangement:spicate	4	0	0	0	0	0	0	0	4	0	4	0	0	0	4	0	0	0	0	0	0	4	0	1	0	0	0	4	0	0	0	4	1	0	0	4	0	4	0	0	0	0	0	0	0	1	0	0	0
racemose arrangement:composed of head like spikes - note: ignore terminal spike	1	1	2	0	0	0	0	1	1	0	1	1	1	1	1	1	1	1	1	0	0	4	0	1	1	1	0	1	2	0	1	4	0	0	1	1	0	1	0	1	1	1	1	1	0	0	0	1	1
racemose arrangement:composed of oblong to linear spikes	0	1	1	1	1	1	0	1	0	1	1	0	0	1	0	1	1	0	0	1	1	0	1	0	1	0	0	0	0	1	0	0	0	1	0	1	1	0	1	1	0	0	0	0	1	0	1	1	0
paniculate arrangement:dense - appears spike-like	0	0	6	0	0	0	0	0	0	0	0	0	0	0	0	0	0	0	0	0	0	1	0	0	0	0	0	0	1	0	0	1	0	0	0	1	0	0	0	0	0	0	1	0	0	0	0	0	0
paniculate arrangement:loose - appears grass-like	0	0	6	0	0	0	1	0	0	0	0	0	0	0	0	0	0	0	0	0	0	0	0	0	0	0	0	0	0	0	0	0	0	0	0	1	0	0	0	0	0	0	0	0	0	0	0	0	0
proximal internode - length in synflorescence#	1:1.0:1.0:3.0:3.0	6	6	6	6	6	3	6	1:2.0:2.0:15.0:15.0	6	6	6	1:3.0:3.0:13.0:13.0	6	6	6	6	1:3.0:3.0:12.0:12.0	6	6	6	6	6	6	6	0	6	1:7.0:7.0:20.0:20.0	6	6	6	6	6	6	6	6	6	1:1.5:1.5:3.5:3.5	6	6	6	6	6	1:7.0:7.0:18.0:18.0	6	6	6	6	1:1.5:1.5:5.0:5.0
second internode - length from proximal internode#	1:1.0:1.0:2.0:2.0	6	6	6	6	6	3	6	1:2.5:2.5:5.0:5.0	6	6	6	1:4.0:4.0:10.0:10.0	6	6	6	6	1:3.0:3.0:9.0:9.0	6	6	6	6	6	6	6	0	6	1:4.0:4.0:8.5:8.5	6	6	6	6	6	6	6	6	6	1:0.5:0.5:2.5:2.5	6	6	6	6	6	1:3.0:3.0:10.0:10.0	6	6	6	6	1:1.0:1.0:3.5:3.5
inflorescence:with number of spikes#	1:4.0:4.0:9.0:9.0;4:1.0:1.0:1.0:1.0	1:1.0:1.0:4.0:4.0	1:2.0:2.0:5.0:5.0	1:3.0:4.0:8.0:12.0	1:3.0:4.0:6.0:9.0	1:3.0:3.0:8.0:8.0	3	1:3.0:3.0:4.0:4.0	1:5.0:5.0:8.0:11.0;4:1.0:1.0:1.0:1.0	1:3.0:3.0:5.0:5.0	1:1.0:2.0:3.0:5.0	1:5.0:5.0:10.0:10.0	1:3.0:3.0:11.0:11.0	1:2.0:3.0:4.0:4.0	3	1:2.0:2.0:5.0:5.0	1:5.0:5.0:7.0:7.0	1:2.0:2.0:8.0:8.0	1:2.0:2.0:6.0:6.0	1:4.0:4.0:5.0:5.0	1:3.0:4.0:8.0:10.0	1:6.0:6.0:30.0:30.0;4:1.0:1.0:1.0:1.0	1:5.0:5.0:9.0:9.0	1:8.0:8.0:12.0:12.0;4:1.0:1.0:1.0:1.0	1:3.0:4.0:6.0:7.0	1:2.0:3.0:4.0:5.0	1:3.0:3.0:5.0:5.0	1:6.0:6.0:20.0:20.0;4:1.0:1.0:1.0:1.0	1:5.0:5.0:8.0:8.0	1:3.0:3.0:6.0:6.0	1:3.0:3.0:6.0:6.0	1:10.0:10.0:15.0:15.0;4:1.0:1.0:1.0:1.0	1:1.0:1.0:1.0:1.0	1:3.0:3.0:5.0:5.0	1:3.0:3.0:6.0:6.0	3	1:3.0:3.0:10.0:10.0	1:3.0:4.0:5.0:6.0;1:1.0:1.0:1.0:1.0	1:3.0:3.0:6.0:6.0	1:5.0:5.0:15.0:15.0	1:3.0:3.0:6.0:6.0	1:5.0:5.0:20.0:20.0	1:3.0:3.0:6.0:6.0	1:3.0:3.0:15.0:15.0	1:4.0:5.0:7.0:8.0	1:1.0:1.0:1.0:1.0	1:3.0:3.0:7.0:7.0	1:3.0:3.0:11.0:11.0	1:5.0:5.0:14.0:14.0
inflorescence:length#	1:1.20:1.20:2.20:2.20	6	1:8.8:8.8:36.0:36.0	3	3	1:15.0:15.0:35.0:35.0	3	6	1:2.0:2.0:4.5:4.5	6	1:1.7:1.9:2.3:3.3	1:1.5:2.0:5.0:5.0	1:2.0:2.0:6.5:6.5	3	1:2.0:3.0:4.0:6.5	6	6	1:1.5:1.5:4.0:4.0	6	6	3	1:4.0:4.0:12.0:12.0	3	1:2.0:2.0:4.0:4.0	3	3	6	1:4.0:4.0:6.5:6.5	6	6	6	1:4.0:4.0:7.0:7.0	1:1.0:1.0:3.0:3.0	6	1:2.0:2.0:8.0:8.0	1:2.0:4.0:8.0:8.0	6	1:1.20:1.20:2.5:2.5	6	1:1.5:1.5:4.0:4.0	1:1.5:1.5:4.0:4.0	1:2.0:2.0:8.0:8.0	1:1.5:1.5:4.0:4.0	1:2.5:2.5:6.5:6.5	3	1:2.5:2.5:4.0:4.0	6	1:12.0:12.0:60.0:60.0	1:0.80:0.80:2.20:2.20
inflorescence:width#	1:6.0:9.0:18.0:18.0	6	3	3	3	6	3	6	1:12.0:12.0:20.0:20.0	6	3	1:8.0:8.0:13.0:13.0	1:7.0:7.0:20.0:20.0	3	3	6	6	1:4.0:4.0:12.0:12.0	6	6	3	1:15.0:15.0:20.0:20.0	3	1:1.350:1.350:1.650:1.650	3	3	6	1:10.0:10.0:18.0:18.0	6	6	6	1:1.0:1.0:15.0:15.0	1:2.0:3.0:4.0:4.0	6	1:2.5:2.5:6.5:6.5	3	6	1:8.0:8.0:18.0:18.0	6	1:7.0:7.0:12.0:12.0	1:8.0:8.0:14.0:14.0	6	1:7.0:7.0:12.0:12.0	1:7.0:7.0:17.0:17.0	3	1:2.5:2.5:3.5:3.5	6	6	1:7.0:7.0:20.0:20.0
inflorescence:spikes - imbricate or isolated within synflorescence:imbricate	1	0	0	1	1	1	0	1	1	0	1	1	1	1	1	1	0	1	1	0	1	1	1	1	1	1	1	1	0	1	1	1	1	1	0	1	0	1	0	1	1	1	1	1	0	1	0	1	1
inflorescence:spikes - imbricate or isolated within synflorescence:imbricate apically, isolated basally	4	4	1	1	1	1	0	1	1	1	1	1	1	1	1	1	1	1	1	1	1	1	1	1	1	1	1	1	1	1	1	1	1	1	1	1	1	1	1	1	1	1	1	1	1	1	1	1	1
inflorescence:spikes - imbricate or isolated within synflorescence:isolated	4	1	1	1	1	0	0	0	0	1	0	0	0	1	0	0	1	1	0	1	0	0	0	0	1	0	0	0	1	0	0	0	1	0	1	0	1	0	1	0	0	0	0	0	1	1	1	0	0
proximal spike:length#	1:4.40:4.40:10.80:10.80	1:6.0:6.0:12.0:12.0	1:6.0:6.0:21.0:21.0	1:30.0:50.0:100.0:150.0	1:30.0:40.0:50.0:70.0	6	3	1:10.0:10.0:15.0:15.0	1:8.0:8.0:11.0:11.0	1:15.0:15.0:50.0:50.0	3	6	1:6.0:6.0:20.0:20.0	3	3	6	1:9.0:9.0:20.0:20.0	1:5.0:5.0:13.0:13.0	1:8.0:8.0:20.0:20.0	1:6.0:6.0:36.0:36.0	1:25.0:30.0:55.0:60.0	6	1:50.0:50.0:120.0:120.0	6	1:10.0:10.0:60.0:60.0	3	1:5.0:5.0:26.0:26.0	1:12.0:12.0:17.0:17.0	1:15.0:15.0:140.0:140.0	1:25.0:25.0:70.0:70.0	1:7.0:7.0:15.0:15.0	6	3	1:15.0:15.0:35.0:35.0	6	3	6	1:9.0:9.0:12.0:12.0	1:25.0:25.0:80.0:80.0	1:5.0:5.0:10.0:10.0	1:6.0:6.0:10.0:10.0	6	6	1:6.0:6.0:17.0:17.0	1:19.0:20.0:35.0:37.0	3	1:5.0:5.0:30.0:30.0	6	1:4.5:4.5:10.0:10.0
proximal spike:width#	1:2.70:2.70:8.40:8.40	1:3.5:3.5:6.0:6.0	1:3.2:3.2:5.7:5.7	3	1:3.0:4.0:5.0:7.0	6	3	1:5.0:5.0:8.0:8.0	1:5.0:5.0:8.0:8.0	1:3.0:3.0:3.5:3.5	3	6	1:4.0:4.0:9.0:9.0	3	3	6	1:5.0:5.0:8.0:8.0	1:4.0:4.0:6.5:6.5	1:4.0:4.0:7.0:7.0	1:3.0:3.0:4.20:4.20	3	6	1:4.0:4.0:5.0:5.0	6	3	3	1:4.60:4.60:9.80:9.80	1:5.0:5.0:8.0:8.0	1:2.5:2.5:6.5:6.5	1:3.0:3.0:5.0:5.0	6	6	0	1:4.0:4.0:6.0:6.0	6	3	6	1:5.5:5.5:9.0:9.0	1:3.0:3.0:4.0:4.0	1:4.0:4.0:6.0:6.0	1:4.0:4.0:6.0:6.0	6	6	1:4.0:4.0:5.70:5.70	3	0	1:3.0:3.0:5.0:5.0	6	1:4.5:4.5:9.0:9.0
proximal spike:peduncle length#	6	1:3.0:3.0:15.0:15.0	3	3	3	6	3	6	6	1:5.0:5.0:25.0:25.0	3	6	6	3	3	6	6	6	6	1:0.0:0.0:58.0:58.0	3	6	3	6	3	3	6	6	6	6	6	6	0	6	6	3	6	6	1:1.0:1.0:30.0:30.0	6	6	6	6	6	3	0	1:20.0:20.0:60.0:60.0	6	6
proximal spike:sexuality:androgynous	0	0	0	0	1	0	0	0	0	0	0	1	0	0	1	0	1	0	0	0	0	1	1	1	1	0	0	0	0	1	0	1	0	0	1	1	0	0	0	0	0	1	1	0	0	0	0	0	0
proximal spike:sexuality:gynecandrous	1	1	0	0	0	0	0	0	1	0	0	0	1	0	0	1	0	1	0	0	0	1	0	0	0	0	0	1	0	0	0	1	0	0	0	0	0	1	0	1	1	0	0	1	0	0	0	0	1
proximal spike:sexuality:pistillate	1	1	1	1	2	1	0	1	1	1	1	1	1	1	1	1	1	1	1	1	1	1	1	1	1	1	1	1	1	1	1	0	0	1	1	1	1	1	1	1	1	1	1	1	1	0	1	1	1
proximal spike:sexuality:staminate	0	0	0	0	0	0	0	0	0	0	0	0	0	0	0	0	0	0	0	0	0	0	0	0	0	0	0	0	0	0	0	0	1	0	0	0	0	0	0	0	0	0	0	0	0	0	0	0	0
proximal spike:perigynia whether imbricate within spike:imbricate	1	1	1	1	1	1	0	1	1	1	1	1	1	1	1	1	1	1	1	1	1	1	1	1	1	1	1	1	1	1	1	1	1	1	1	1	1	1	1	1	1	1	1	1	1	1	1	1	1
proximal spike:perigynia whether imbricate within spike:imbricate apically, isolated basally	1	1	1	1	1	1	0	1	1	1	1	1	1	1	1	1	1	1	1	1	1	1	1	1	1	1	1	1	1	1	1	1	1	1	1	1	1	1	1	1	1	1	1	1	1	1	1	1	1
proximal spike:perigynia whether imbricate within spike:isolated	0	0	0	0	0	0	0	0	0	2	0	0	0	1	0	0	0	0	0	0	0	0	0	0	0	0	0	0	0	0	0	0	0	0	0	0	0	0	0	0	0	0	0	0	0	0	0	0	0
(2) terminal spike:length#	1:4.4:4.4:10.8:10.8	1:3.5:3.5:11.5:11.5	1:12.0:12.0:49.0:49.0	1:20.0:20.0:60.0:60.0	3	6	3	6	6	1:20.0:20.0:35.0:35.0	3	6	6	3	3	1:2.8:2.8:14.0:14.0	1:9.0:9.0:19.0:19.0	6	6	1:4.0:4.0:18.0:18.0	1:25.0:30.0:40.0:60.0	6	1:50.0:50.0:170.0:170.0	6	3	3	1:7.0:7.0:34.0:34.0	6	1:5.0:5.0:95.0:95.0	6	6	6	1:30.0:30.0:40.0:40.0	6	6	3	6	6	1:6.0:6.0:40.0:40.0	6	6	6	6	6	3	1:25.0:25.0:40.0:40.0	1:11.0:11.0:30.0:30.0	6	6
(2) terminal spike:width#	1:2.7:2.7:8.4:8.4	1:0.60:0.60:1.60:1.60	1:1.3:2.1:4.0:4.0	3	3	6	3	6	6	1:1.5:1.5:3.5:3.5	3	6	6	3	3	1:0.5:0.5:1.80:1.80	1:2.5:2.5:4.5:4.5	6	6	1:1.20:1.20:1.60:1.60	3	6	1:2.5:2.5:3.5:3.5	6	3	3	1:1.10:1.10:2.70:2.70	6	6	6	6	6	1:2.0:3.0:4.0:4.0	6	6	3	6	6	1:0.80:0.80:2.0:2.0	6	6	6	6	6	3	1:2.5:2.5:3.5:3.5	1:1.5:1.5:3.0:3.0	6	6
(2) terminal spike:peduncle length#	6	1:0.0:1.0:5.0:10.0	1:14.0:98.0:141.0:141.0	3	3	6	3	6	6	6	3	6	6	3	3	1:0.40:0.40:9.90:9.90	6	6	6	1:0.0:0.0:0.0:0.0	3	6	3	6	3	3	1:1.60:1.60:37.0:37.0	6	6	6	6	6	6	6	6	3	6	6	1:0.0:0.0:28.0:28.0	6	6	6	6	6	3	6	1:40.0:40.0:60.0:60.0	6	6
(2) terminal spike:(a) sexuality:androgynous	0	0	0	0	0	0	0	1	0	0	0	1	0	0	1	0	1	0	0	0	0	1	1	1	0	0	0	0	0	0	0	1	2	0	1	1	0	0	0	0	0	1	1	0	0	1	0	0	0
(2) terminal spike:(a) sexuality:gynecandrous	1	0	0	0	0	0	0	1	1	1	1	0	1	0	0	0	0	1	1	0	1	1	0	0	1	0	0	1	1	0	0	0	0	0	0	0	0	1	0	1	1	0	0	1	0	0	0	0	1
(2) terminal spike:(a) sexuality:pistillate	0	0	0	0	0	0	0	0	0	0	0	0	0	0	0	0	0	0	0	0	0	0	0	0	0	0	0	0	0	0	0	0	1	0	0	0	0	0	0	0	0	0	0	0	0	0	0	0	0
(2) terminal spike:(a) sexuality:staminate	0	1	1	1	1	1	0	1	0	0	2	0	0	1	0	1	1	0	0	1	1	0	1	0	1	1	1	0	1	1	1	0	1	1	0	0	1	0	1	0	0	1	0	0	1	0	1	1	0
stigma number:stigmas#	1:2.0:2.0:2.0:2.0	1:3.0:3.0:3.0:3.0	1:3.0:3.0:3.0:3.0	1:2.0:2.0:2.0:2.0	1:3.0:3.0:3.0:3.0	1:3.0:3.0:3.0:3.0	1:3:3:3:3	1:2.0:2.0:3.0:3.0	1:2.0:2.0:2.0:2.0	1:3.0:3.0:3.0:3.0	1:3.0:3.0:3.0:3.0	1:2.0:2.0:2.0:2.0	1:2.0:2.0:2.0:2.0	1:3.0:3.0:3.0:3.0	1:2.0:2.0:2.0:2.0	1:3.0:3.0:3.0:3.0	1:2.0:2.0:3.0:3.0	1:2.0:2.0:2.0:2.0	1:3.0:3.0:3.0:3.0	1:3.0:3.0:3.0:3.0	1:3.0:3.0:3.0:3.0	1:2.0:2.0:2.0:2.0	1:2.0:2.0:2.0:2.0	1:2.0:2.0:2.0:2.0	1:3.0:3.0:3.0:3.0	1:3.0:3.0:3.0:3.0	1:3.0:3.0:3.0:3.0	1:2.0:2.0:2.0:2.0	1:3.0:3.0:3.0:3.0	1:2.0:2.0:2.0:2.0	1:3.0:3.0:3.0:3.0	1:2.0:2.0:2.0:2.0	1:2.0:2.0:3.0:3.0	1:2.0:2.0:2.0:2.0	1:2.0:2.0:2.0:2.0	1:2.0:2.0:2.0:2.0	1:2.0:2.0:2.0:2.0	1:2.0:2.0:2.0:2.0	1:3.0:3.0:3.0:3.0	1:2.0:2.0:2.0:2.0	1:2.0:2.0:2.0:2.0	1:2.0:2.0:2.0:2.0	1:2.0:2.0:2.0:2.0	1:2.0:2.0:2.0:2.0	1:3.0:3.0:3.0:3.0	1:3.0:3.0:3.0:3.0	1:3.0:3.0:3.0:3.0	1:3.0:3.0:3.0:3.0	1:2.0:2.0:2.0:2.0
anther length#	3	1:1.20:1.20:1.80:1.80	3	3	3	3	3	3	3	3	3	1:1.5:1.5:2.5:2.5	3	1:2.2:2.6:3.0:3.2	3	1:1.5:1.5:2.70:2.70	1:1.40:1.40:2.20:2.20	3	3	1:2.0:2.0:2.20:2.20	3	3	3	3	3	3	1:2.0:2.0:2.80:2.80	3	3	3	3	3	3	3	1:2.0:2.0:3.40:3.40	3	3	3	3	3	3	3	1:1.30:1.30:1.80:1.80	3	3	3	3	3	3
pistillate scale:length#	1:2.40:2.40:3.90:3.90	1:1.5:1.5:2.0:2.0	1:2.8:2.8:4.8:4.8	3	1:2.9:3.0:3.5:3.7	3	3	3	1:4.0:4.0:5.5:5.5	3	3	1:2.20:2.20:3.5:3.5	1:2.80:2.80:3.80:3.80	1:2.2:2.5:3.0:3.3;4:2.8:2.9:3.0:3.2	3	1:2.20:2.20:3.40:3.40	1:2.0:2.0:4.0:4.0	1:2.5:2.5:3.40:3.40	3	1:2.80:2.80:3.20:3.20	1:2.9:3.0:4.0:4.1	3	1:3.0:3.0:4.0:4.0	3	1:1.9:2.0:3.0:3.1	3	1:3.70:3.70:8.0:8.0	1:3.5:3.5:5.5:5.5	3	3	3	3	3	3	1:1.20:1.20:1.90:1.90	3	3	1:4.30:4.30:5.60:5.60	3	3	3	1:5.0:5.0:7.80:7.80	1:2.0:2.0:3.5:3.5	1:3.20:3.20:4.60:4.60	1:3.4:3.5:5.0:5.1	3	3	3	1:2.40:2.40:4.30:4.30
pistillate scale:width#	3	1:0.80:0.80:1.0:1.0	1:1.6:1.6:2.1:2.1	3	1:1.2:1.3:1.6:1.8	3	3	3	3	3	3	1:1.20:1.20:1.80:1.80	3	3	3	1:0.40:0.40:1.80:1.80	1:1.20:1.20:2.0:2.0	3	3	1:1.40:1.40:2.0:2.0	3	3	1:1.0:1.0:2.0:2.0	3	3	3	1:1.20:1.20:2.40:2.40	3	3	3	3	3	3	3	1:0.90:0.90:1.60:1.60	3	3	3	3	3	3	3	1:1.20:1.20:2.40:2.40	3	3	3	3	3	3
pistillate scale:awn length#	3	6	1:0.6:0.6:2.8:2.8	3	3	1:0.0:0.0:3.5:3.5	3	1:0.0:0.0:0.490:0.490	3	6	3	6	1:0.010:0.010:0.80:0.80	3	3	6	6	6	3	6	3	6	1:0.5:0.5:0.8:0.8	6	3	3	1:1.10:1.10:6.0:6.0	6	6	3	3	1:0.10:0.10:1.5:1.5	3	3	6	3	6	3	1:0.010:0.010:1.5:1.5	6	3	3	6	6	3	3	1:1.0:1.0:3.0:3.0	6	6
pistillate scale:tip condition:acute to acuminate	6	6	6	6	1	6	0	6	6	6	1	6	6	1	1	6	6	6	6	6	1	6	6	6	1	1	6	6	6	6	6	6	6	6	1	1	1	1	1	1	1	1	1	1	1	1	0	0	1
pistillate scale:tip condition:rounded to truncate	6	6	6	6	1	6	0	6	6	6	0	6	6	0	0	6	6	6	6	6	0	6	6	6	0	1	6	6	6	6	6	6	6	6	1	0	1	0	0	0	0	0	0	0	0	1	0	0	0
pistillate scale:tip condition:awned	6	6	6	6	1	6	0	6	6	6	1	6	6	1	1	6	6	6	6	6	1	6	6	6	1	0	6	6	6	6	6	6	6	6	1	1	1	0	1	1	0	0	1	1	1	0	1	1	1
staminate scale:length#	3	1:2.60:2.60:3.60:3.80	1:4.2:4.2:6.5:6.5	3	1:5.6:5.7:6.3:6.6	6	3	6	6	6	3	6	6	1:4.5:5.0:6.0:7.0	3	1:2.80:2.90:6.0:6.0	1:2.80:2.80:4.30:4.30	6	6	1:2.80:2.80:3.20:3.20	3	6	3	6	3	3	1:3.60:3.60:4.90:4.90	6	6	6	6	6	6	6	6	3	6	6	6	6	6	6	6	6	3	6	6	6	6
staminate scale:width#	6	1:0.80:0.80:1.0:1.0	1:1.6:1.6:2.4:2.4	3	3	6	3	6	6	6	3	6	6	3	3	1:0.6:0.6:1.90:1.90	1:1.0:1.0:2.40:2.40	6	6	1:1.40:1.40:2.0:2.0	3	6	3	6	3	3	1:1.10:1.10:1.90:1.90	6	6	6	6	6	6	6	6	3	6	6	6	6	6	6	6	6	3	6	6	6	6
perigynia number per spike#	6	1:3.0:8.0:13.0:13.0	1:2.0:4.0:7.0:11.0	3	3	6	3	6	6	1:15.0:15.0:30.0:30.0	3	1:5.0:5.0:15.0:15.0	6	3	3	1:4.0:4.0:14.0:14.0	6	6	6	1:3.0:3.0:20.0:20.0	3	6	3	6	3	3	1:3.0:3.0:18.0:18.0	6	1:40.0:40.0:470.0:705.0	6	1:10.0:10.0:25.0:25.0	6	6	6	1:2.0:2.0:7.0:7.0	3	6	6	1:15.0:15.0:45.0:45.0	1:10.0:10.0:20.0:20.0	1:15.0:15.0:30.0:30.0	6	1:8.0:8.0:20.0:20.0	6	3	1:15.0:15.0:30.0:30.0	1:1.0:1.0:10.0:10.0	6	6
(1) perigynium:(a) length#	1:2.90:3.6:5.40:5.40	1:2.80:2.80:4.20:4.20	1:3.7:4.2:4.9:4.9	1:2.0:2.0:3.5:3.5	1:3.0:3.1:3.4:3.7	1:3.0:3.0:4.5:4.5	1:2.511:3.0:3.0:3.511	1:2.5:2.5:3.80:3.80	1:4.0:4.0:5.0:5.0	1:2.0:2.0:3.2:3.2	1:3.0:3.2:3.5:4.0	1:3.40:3.40:4.60:4.60	1:4.0:4.0:5.5:5.5	1:2.4:2.5:2.9:3.4;4:3.5:3.5:4.0:4.0	1:3.7:4.2:4.5:4.7	1:2.3:2.3:3.30:3.30	1:3.10:3.10:4.5:4.5	1:2.60:2.60:4.5:4.5	1:3.0:3.0:3.5:3.5	1:3.0:3.0:4.20:4.20	1:3.4:3.5:4.0:4.2	1:3.0:3.0:4.5:4.5	1:2.0:2.0:2.5:2.5	1:3.80:3.80:4.20:4.20	1:2.9:3.0:3.5:3.6	1:2.2:2.4:2.6:2.9	1:4.20:4.20:5.20:5.20	1:3.5:3.5:5.20:5.20	1:2.40:2.40:3.10:3.10	1:2.20:2.20:3.0:3.0	1:2.5:2.5:4.0:4.0	1:2.20:2.20:3.0:3.0	1:3.0:3.0:4.0:4.0	1:2.5:2.5:2.80:2.80	1:2.0:2.0:3.40:3.40	1:2.4:2.5:3.0:3.1	1:1.90:1.90:3.60:3.60	1:4.0:4.0:5.5:5.5	1:3.0:3.0:5.0:5.0	1:2.0:2.0:3.5:3.5	1:2.20:2.20:3.0:3.0	1:4.0:4.0:6.0:6.0	1:3.30:3.30:4.0:4.0	1:3.0:3.0:4.5:4.5	1:3.9:4.0:4.5:4.6	1:2.5:2.5:3.0:3.0	1:5.0:5.0:6.5:6.5	1:6.5:6.5:12.0:12.0	1:2.80:2.80:4.80:4.80
(1) perigynium:(b) width#	1:1.0:1.0:2.10:2.10	1:1.40:1.40:2.0:2.0	1:1.6:1.6:1.9:1.9	3	1:1.7:1.8:2.4:2.5	1:1.40:1.40:2.10:2.10	3	1:1.20:1.20:1.80:1.80	1:1.90:1.90:2.5:2.5	1:0.80:0.80:1.0:1.0	1:1.0:1.1:1.3:1.6	1:1.90:1.90:2.80:2.80	1:2.5:2.5:3.80:3.80	1:0.9:1.0:1.3:1.5	1:1.1:1.3:1.5:1.7	1:0.8:0.8:1.2:1.2	1:1.0:1.0:1.60:1.60	1:1.5:1.5:2.70:2.70	1:2.0:2.0:2.5:2.5	1:1.80:1.80:2.10:2.10	3	1:1.5:1.5:2.0:2.0	1:1.0:1.0:2.0:2.0	1:1.5:1.5:1.90:1.90	3	1:0.9:1.2:1.3:1.6	1:1.5:1.5:2.20:2.20	1:1.5:1.5:1.80:1.80	1:1.5:1.5:1.70:1.70	1:1.20:1.20:2.0:2.0	1:1.0:1.0:1.5:1.5	1:1.5:1.5:2.20:2.20	1:1.30:1.30:1.60:1.60	1:1.5:1.5:2.0:2.0	1:0.80:0.80:1.30:1.30	3	1:1.0:1.0:2.30:2.30	1:2.0:2.0:2.70:2.70	1:1.0:1.0:2.0:2.0	1:1.20:1.20:1.5:1.5	1:0.80:0.80:1.80:1.80	1:1.30:1.30:3.30:3.30	1:2.30:2.30:3.0:3.0	1:1.90:1.90:2.30:2.30	3	1:0.80:0.80:1.20:1.20	1:0.80:0.80:1.80:1.80	1:1.80:1.80:3.80:3.80	1:0.80:0.80:1.80:1.80
(1) perigynium:thickness#	1:0.40:0.40:0.50:0.60	6	3	3	3	6	3	6	1:0.70:0.70:1.10:1.10	6	6	6	1:0.40:0.40:0.5:0.5	6	6	6	6	1:0.30:0.30:0.450:0.450	6	6	6	6	3	6	6	0	6	1:0.60:0.60:0.80:0.80	6	6	6	6	6	6	6	3	6	1:0.25:0.25:0.5:0.5	6	6	6	6	6	1:0.10:0.10:0.60:0.60	6	6	6	6	1:0.30:0.350:0.5:0.5
(1) perigynium:beak tip to achene distance#	1:1.60:2.0:2.3:2.3	6	6	0	6	6	3	6	1:1.70:1.70:1.70:1.70	6	6	6	1:1.80:1.80:3.0:3.0	6	6	6	6	1:1.0:1.0:2.0:2.0	6	6	6	6	6	6	6	0	6	1:1.80:1.80:3.0:3.0	6	6	6	6	6	6	6	0	6	1:1.90:1.90:2.90:2.90	6	6	6	6	6	1:1.5:1.5:1.75:1.75	6	6	6	6	1:1.90:1.90:2.5:2.5
(1) perigynium:number of nerves#	1:8.0:8.0:18.0:18.0	6	1:49.0:49.0:64.0:64.0	1:0.0:0.0:10.0:10.0	1:0.0:0.0:0.0:4	1:10.0:10.0:20.0:20.0	3	6	1:7.0:7.0:13.0:13.0	1:2.0:12.0:15.0:17.0	1:2.0:4.0:5.0:8.0	1:0.0:0.0:5.0:5.0	1:3.0:3.0:16.0:16.0	1:10.0:18.0:25.0:32.0	1:10.0:12.0:22.0:28.0	1:0.0:0.0:0.0:0.0	1:11.0:11.0:16.0:16.0	1:8.0:8.0:16.0:16.0	1:0.0:0.0:0.0:2.0	6	3	1:3.0:3.0:8.0:8.0	1:0.0:1.0:3.0:5.0	1:0.0:3.0:5.0:7.0	3	1:4.0:6.0:8.0:12.0	1:52.0:52.0:64.0:64.0	1:10.0:10.0:19.0:19.0	1:2.0:2.0:9.0:9.0	1:1.0:1.0:5.0:7.0	3	1:3.0:3.0:3.0:3.0	3	1:0.0:0.0:0.0:2.00	1:0.0:0.0:0.0:2.0	3	1:0.0:0.0:0.0:3.0	3	1:2.0:2.0:17.0:17.0	3	3	3	1:0.0:1.0:2.0:4.0	1:8.0:8.0:20.0:20.0	3	1:0.0:2.0:5.0:5.0	3	1:12.0:12.0:21.0:21.0	1:0.0:0.0:17.0:17.0
(1) perigynium:shape in cross section:biconvex	1	0	0	1	1	0	0	1	1	0	1	0	0	0	0	0	1	0	1	0	0	0	1	0	0	4	0	0	0	1	0	0	0	1	0	0	1	0	0	0	0	0	0	0	0	0	0	0	0
(1) perigynium:shape in cross section:circular to subcircular	0	0	0	0	0	1	0	1	0	1	1	0	0	1	0	1	1	0	1	1	1	0	0	0	1	1	1	0	1	0	0	0	1	0	0	1	0	0	1	0	0	0	0	0	1	1	1	1	0
(1) perigynium:shape in cross section:planoconvex to concavoconvex to flat	1	0	0	1	0	0	0	1	1	0	0	1	1	0	1	0	0	1	0	0	0	1	1	1	1	0	0	1	0	1	0	1	0	1	1	1	1	1	0	1	1	1	1	1	0	0	0	0	1
(1) perigynium:shape in cross section:trigonous	0	1	1	0	0	1	0	0	0	1	1	0	0	1	4	1	1	0	0	0	0	0	0	0	1	0	1	0	1	0	1	0	0	0	0	0	0	0	1	0	0	0	0	0	1	1	1	1	0
(1) perigynium:whether alate:alate	1	0	0	0	0	0	0	0	1	0	0	0	1	0	3	0	0	1	0	0	0	0	0	0	0	0	0	1	0	0	0	0	0	0	0	0	0	1	0	0	0	1	1	1	0	0	0	0	1
(1) perigynium:whether alate:not alate	1	1	1	1	1	1	0	1	0	1	1	1	0	1	3	1	1	0	1	1	1	1	1	1	1	1	1	0	1	1	1	1	1	1	1	1	1	0	1	1	1	0	1	0	1	1	1	1	0
(1) perigynium:abaxial nerve number#	1:5.0:7.0:10.0:10.0	6	3	3	1:0.0:0.0:0.0:2.0	6	3	6	1:7.0:7.0:11.0:11.0	6	1:0:0:2.0:4.0	1:0.0:0.0:5.0:5.0	1:3.0:3.0:8.0:8.0	3	1:5.0:8.0:12.0:18.0	1:0.0:0.0:0.0:0.0	6	1:4.0:4.0:8.0:10.0	1:0.0:0.0:0.0:0.0	6	3	1:3.0:3.0:5.0:5.0	1:0:1:2:2	1:0.0:0.0:5.0:5.0	3	3	6	1:6.0:6.0:11.0:11.0	6	1:1.0:1.0:3.0:3.0	6	1:3.0:3.0:3.0:3.0	6	6	1:0.0:0.0:0.0:0.0	3	6	6	6	6	6	6	6	1:4.0:4.0:10.0:10.0	3	6	6	6	1:0.0:0.0:9.0:9.0
(1) perigynium:adaxial nerve number#	1:3.0:3.0:8.0:8.0	6	3	3	1:0.0:0.0:0.0:2.0	6	3	6	1:0.0:0.0:2.0:2.0	6	1:0:0:2.0:4.0	1:0.0:0.0:0.0:0.0	1:3.0:3.0:8.0:8.0	3	1:3.0:5.0:8.0:10.0	1:0.0:0.0:0.0:0.0	6	1:4.0:4.0:8.0:10.0	1:0.0:0.0:0.0:0.0	6	3	1:0.0:0.0:3.0:3.0	1:0:0:2:2	1:0.0:0.0:0.0:0.0	3	3	6	1:4.0:4.0:8.0:8.0	6	0	6	1:0.0:0.0:0.0:0.0	6	6	1:0.0:0.0:0.0:0.0	3	6	6	6	6	6	6	6	1:4.0:4.0:10.0:10.0	3	6	6	6	1:0.0:0.0:8.0:8.0
(1) perigynium:surface red dotted:absent	6	6	6	6	0	6	0	6	6	6	6	1	6	1	6	6	6	6	6	6	6	1	6	6	6	0	6	6	6	6	6	1	6	6	6	6	6	6	6	6	6	6	6	6	0	6	6	6	6
(1) perigynium:surface red dotted:present	6	6	6	6	1	6	0	6	6	6	6	0	6	0	6	6	6	6	6	6	6	0	6	6	6	0	6	6	6	6	6	0	6	6	6	6	6	6	6	6	6	6	6	6	0	6	6	6	6
(1) perigynium:perigynium beak:whether present:absent	0	0	1	0	1	0	0	1	0	1	0	0	0	0	0	0	0	0	0	0	0	0	0	0	0	0	1	0	0	0	0	0	0	0	0	0	0	0	0	0	0	0	0	0	0	0	0	0	0
(1) perigynium:perigynium beak:whether present:present	1	1	1	1	1	1	0	1	1	1	1	1	1	1	1	1	1	1	1	1	1	1	1	1	1	1	1	1	1	1	1	1	1	1	1	1	1	1	1	1	1	1	1	1	1	1	1	1	1
(1) perigynium:perigynium beak:in relation to perigynia base:straight	1	1	1	1	1	1	0	1	1	1	1	1	1	1	1	1	1	1	1	0	1	1	1	1	1	1	1	1	0	1	1	1	1	1	1	1	1	1	1	1	1	1	1	1	1	1	1	1	1
(1) perigynium:perigynium beak:in relation to perigynia base:bending away from axis	0	0	1	1	0	0	0	0	0	2	0	0	0	0	0	0	0	1	0	1	1	0	0	0	1	0	0	0	1	0	0	0	1	0	0	1	0	0	0	0	0	0	0	0	1	0	0	0	0
(1) perigynium:perigynium beak:length#	6	6	1:0.0:0.0:0.7:0.9	3	3	1:0.30:0.30:0.60:0.60	3	1:0.0:0.0:0.20:0.20	6	6	3	1:0.70:0.70:1.40:1.40	1:0.850:0.850:2.20:2.20	3	3	1:0.20:0.20:0.30:0.30	1:0.60:0.60:1.20:1.20	6	1:0.30:0.30:0.40:0.40	1:0.30:0.30:0.60:0.60	3	1:1.0:1.0:1.5:1.5	3	1:0.0:0.0:2.0:2.0	3	3	1:0.0:0.0:0.20:0.20	6	1:0.70:0.70:1.10:1.10	1:0.20:0.20:0.5:0.5	1:0.20:0.20:0.5:0.5	1:0.5:0.5:1.20:1.20	6	1:0.10:0.10:0.30:0.30	1:0.30:0.30:1.0:1.0	3	6	6	1:0.70:0.70:1.5:1.5	6	1:0.10:0.10:0.30:0.30	1:1.20:1.20:2.5:2.5	1:0.80:0.80:1.20:1.20	6	1:2.2:2.3:2.5:2.7	1:0.010:0.010:0.5:0.5	1:0.10:0.10:2.5:2.5	1:2.10:2.10:4.0:4.0	6
(1) perigynium:perigynium beak teeth:whether present:absent	1	1	1	1	1	0	0	1	0	1	0	0	0	1	0	0	0	0	4	1	0	0	0	0	0	0	1	0	4	1	4	0	1	1	0	0	1	0	0	0	1	0	0	0	0	0	0	0	0
(1) perigynium:perigynium beak teeth:whether present:present	1	0	0	0	2	1	0	2	1	0	1	1	1	0	1	1	1	1	1	0	1	1	1	1	1	1	0	1	1	1	1	1	0	4	1	1	1	1	1	1	4	1	1	1	1	1	1	1	1
(1) perigynium:perigynium beak teeth:teeth length#	6	6	3	3	3	1:0.10:0.10:0.30:0.30	3	6	6	1:0.0:0.0:0.0:0.0	6	1:0.30:0.30:1.0:1.0	6	3	3	1:0.1:0.1:0.4:0.4	6	6	6	6	3	6	3	6	3	3	6	6	6	6	6	6	6	6	1:0.10:0.10:0.40:0.40	3	6	6	6	6	6	6	1:0.30:0.30:0.70:0.70	6	3	6	6	1:1.20:1.20:3.0:3.0	6
(1) perigynium:perigynium beak teeth:teeth orientation to one another:parallel	1	6	6	6	0	1	0	1	1	6	1	1	1	6	1	1	1	1	1	6	1	1	1	1	1	1	6	1	1	1	1	1	6	1	1	1	6	1	1	1	1	1	1	1	1	1	6	0	1
(1) perigynium:perigynium beak teeth:teeth orientation to one another:spreading	0	6	6	6	0	0	0	0	0	6	0	0	0	6	0	0	0	0	0	6	0	0	0	0	0	0	6	1	0	0	0	0	6	0	0	0	6	0	0	0	0	1	0	0	0	1	6	1	1
(4) achene:(a) length#	1:1.20:1.20:1.8:1.8	1:2.60:2.60:4.0:4.0	1:3.1:3.1:3.3:3.3	3	3	1:1.80:1.80:2.20:2.20	1:1.211:1.5:1.5:1.711	3	1:2.0:2.10:2.5:2.5	1:1.80:1.80:2.10:2.10	1:1.7:1.8:2.0:2.2	1:1.80:1.80:2.10:2.10	1:1.70:1.70:2.0:2.0	1:1.7:1.8:2.0:2.3;4:2.2:2.3:2.5:2.7	1:1.5:1.7:1.9:2.1	1:1.20:1.20:1.70:1.70	1:1.20:1.20:1.90:1.90	1:1.30:1.30:1.70:1.70	1:1.30:1.30:2.0:2.0	1:2.5:2.5:3.80:3.80	1:1.4:1.5:2.0:2.2	1:1.20:1.20:1.5:1.5	3	1:1.30:1.30:1.70:1.70	1:1.2:1.5:1.8:1.8	1:1.6:1.8:2.0:2.2	1:2.60:2.60:3.40:3.40	1:1.80:1.80:2.0:2.0	1:1.5:1.5:1.70:1.70	1:1.0:1.0:1.5:1.5	1:1.20:1.20:1.70:1.70	1:1.20:1.20:1.5:1.5	1:1.20:1.20:1.70:1.70	1:1.30:1.30:1.70:1.70	1:1.40:1.40:2.0:2.0	3	1:1.10:1.10:1.80:1.80	1:1.60:1.60:2.10:2.10	1:1.70:1.70:2.60:2.60	1:1.20:1.20:1.5:1.5	1:1.20:1.20:1.70:1.70	1:1.5:1.5:2.0:2.0	1:1.5:1.5:2.0:2.0	1:1.5:1.5:1.80:1.80	3	1:1.80:1.80:2.20:2.20	1:1.80:1.80:2.5:2.5	1:2.0:2.0:3.20:3.20	1:1.0:1.0:1.60:1.60
(4) achene:(b) width#	4:0.70:0.70:1.10:1.10	1:1.20:1.20:1.80:1.80	1:1.5:1.5:1.8:1.8	3	3	3	3	3	1:1.60:1.60:2.0:2.0	1:0.80:0.80:0.80:0.80	1:1.0:1.2:1.4:1.6	1:1.60:1.60:1.80:1.80	1:0.90:0.90:1.10:1.10	3	1:0.9:1.1:1.3:1.5	1:0.70:0.70:1.30:1.30	1:0.90:0.90:1.5:1.5	1:0.70:0.70:1.0:1.0	1:0.70:0.70:1.30:1.30	1:1.60:1.60:1.80:1.80	3	1:1.0:1.0:1.20:1.20	3	1:1.10:1.10:1.5:1.5	3	1:0.9:1.0:1.1:1.2	1:1.30:1.30:1.80:1.80	1:1.0:1.0:1.30:1.30	1:1.0:1.0:1.30:1.30	1:0.70:0.70:1.30:1.30	3	1:1.00:1.0:1.20:1.20	1:0.70:0.70:1.60:1.60	3	1:0.80:0.80:1.30:1.30	3	1:0.70:0.70:1.60:1.60	1:1.0:1.0:1.40:1.40	1:0.80:0.80:1.70:1.70	3	1:1.0:1.0:1.25:1.25	3	1:1.5:1.5:1.80:1.80	1:1.0:1.0:1.20:1.20	3	1:0.5:0.5:1.0:1.0	1:0.70:0.70:1.0:1.0	1:1.20:1.20:1.5:1.5	1:0.70:0.70:1.0:1.0
(4) achene:thickness#	1:0.30:0.4:0.5:0.5	6	6	6	3	6	3	6	1:0.70:0.70:1.0:1.0	6	3	6	1:0.30:0.30:0.40:0.40	6	3	6	6	1:0.30:0.30:0.40:0.40	6	6	6	6	6	6	6	0	6	1:0.60:0.60:0.70:0.70	6	6	6	6	6	6	6	6	6	1:0.30:0.30:0.5:0.5	6	6	6	6	6	1:0.10:0.10:0.5:0.5	6	6	6	6	1:0.30:0.30:0.40:0.40
(4) achene:shape in cross section:biconvex to elliptic	1	0	0	1	3	0	0	0	1	0	0	1	1	0	1	0	1	1	0	0	0	1	1	1	0	0	0	1	0	1	0	1	0	1	1	1	1	1	0	1	1	1	1	1	0	1	0	0	1
(4) achene:shape in cross section:trigonous	0	1	1	0	3	1	1	1	0	1	1	0	0	1	0	1	1	0	1	1	1	0	0	0	1	1	1	0	1	0	1	0	1	0	0	0	0	0	1	0	0	0	0	0	1	1	1	1	0
(4) achene: symmetry of cross section:symmetrical	1	1	1	6	3	1	1	1	1	1	1	1	1	1	1	1	1	1	1	1	1	1	1	1	1	1	1	1	1	1	1	1	1	1	1	1	1	1	1	1	1	1	1	1	1	1	1	1	1
(4) achene: symmetry of cross section:irregular	0	0	0	6	3	0	0	0	0	0	0	0	0	0	0	0	0	0	0	0	0	0	0	0	0	0	0	0	0	0	0	0	0	0	0	0	0	0	0	0	0	0	0	0	0	0	0	0	0
(4) achene:achene beak:whether bent or straight:bent	0	1	1	3	3	1	0	3	0	0	0	0	0	0	0	3	3	1	0	1	3	0	1	0	3	0	0	0	1	3	0	0	0	0	0	3	0	0	0	0	0	3	0	0	0	0	0	1	0
(4) achene:achene beak:whether bent or straight:straight	1	1	1	3	3	1	0	3	1	1	1	1	1	1	1	3	3	2	1	1	3	1	1	1	3	1	1	1	0	3	1	1	1	1	1	3	1	1	1	1	1	3	1	1	0	1	1	1	1
style:whether deciduous or persistent:deciduous	1	1	1	1	3	1	0	1	1	1	1	1	1	1	1	1	1	1	1	1	1	1	1	0	0	1	1	1	1	1	1	1	1	1	1	1	1	1	1	1	1	1	1	1	1	1	1	0	1
style:whether deciduous or persistent:persistent	0	0	0	0	3	1	0	0	0	0	0	0	0	1	0	0	0	0	0	0	0	0	0	1	1	0	0	0	0	0	0	0	0	0	0	0	0	0	0	0	0	0	0	0	0	0	0	1	0
[truncated: 519 more columns]
